# Supplementary material for: Ribosome profiling reveals an important role for translational control in circadian gene expression
Source: HighWire-hosted journal article supplement (doi:10.1101/gr.191296.115), 2015-09-03
Supplement: Supplemental_Methods.docx [file Supplemental_Methods.docx]

**Supplementary Methods**

**Library Preparation from Ribosome Protected Fragments and Sequencing**

Library generation was performed as described previously ([Ingolia et al. 2012](#_ENREF_34)), with some modifications. Briefly, RPFs were resuspended in 10 μL of 10 mM Tris, pH 8.0, and dephosphorylated with T4 polynucleotide kinase (New England Biolabs) in the presence of 20 units of SUPERase•In in a final volume of 40 μL. The reaction was incubated for 1 hour at 37˚C, and inactivated for 10 minutes at 70˚C. RNAs were isopropanol precipitated, and ligated to the preadenylated and 3′ blocked cloning Linker-1 (IDT) by incubation with truncated T4 RNA ligase 2 (New England Biolabs) for 2.5 hours at room temperature. Ligated RPFs were isopropanol precipitated and gel purified from a 15% TBE-Urea gel before being reverse transcribed with SuperScript III (Life Technologies), using primer NI-NI-9. The RNA template was then removed by alkaline hydrolysis, and the reverse transcription products were isopropanol precipitated and gel purified. DNA fragments were circularized with CircLigase (Epicentre) in a final volume of 20 μL and reverse transcription products corresponding to rRNAs were removed by subtractive hybridization using MyOne Streptavidin C1 Dynabeads (Life Technologies) and the three biotinylated DNA oligos NI-NI-21, NI-NI-23, and NI-NI-24, which are complementary to the rRNAs with accession numbers NR_003285.2:124-155, NR_003287.1:182-213, and NR_003287.1:1435-1461, respectively. The resulting DNA was precipitated and used as a template for PCR amplification with Phusion polymerase (New England Biolabs) using NI-NI-2 and one of the index amplification primers CJ-NI-4, CJ-NI-6, CJ-NI-12, or CJ-NI-23. PCR amplified libraries were pooled and sequenced on a HiSeq 2000 using a V3 flowcell at the University of Pennsylvania Next Generation Sequencing Core. Pooled libraries were sequenced as single, 50bp reads.

**Library Preparation from Total RNA and Sequencing**

Cleared lysate frozen with QIAzol lysis reagent was processed according to the Qiagen miRNeasy Quick-Start Protocol. RNA integrity was verified by Bioanalyzer (Agilent Technologies) before library preparation as described according to the TruSeq Stranded Total RNA Sample Prep Kit (Illumina). PCR amplified libraries were pooled and sequenced on a HiSeq 2000 using a V3 flowcell at the University of Pennsylvania Next Generation Sequencing Core. Pooled libraries were sequenced as single, 100 bp reads.

**Data Alignment, Quantification, and Analysis for Cycling Transcripts**

Raw FASTQ files from RPF library sequencing were preprocessed as previously described ([Ingolia et al. 2012](#_ENREF_11)). Briefly, low quality reads were discarded using FASTQ illumina filter. 3' linker sequences and the first nucleotide from the 5' end were removed from each sequence using FASTX-Toolkit (http://hannonlab.cshl.edu/fastx_toolkit/). The resulting reads were aligned against a library of rRNA sequences ([Ingolia et al. 2012](#_ENREF_11)) using Bowtie ([Langmead et al. 2009](#_ENREF_14)), and only the unaligned reads were retained for downstream analysis.

Following preprocessing, the remaining reads were aligned to the reference human genome (GRCh37/hg19) using STAR ([Dobin et al. 2013](#_ENREF_5)) with default parameters. All read counts were calculated using HTSeq ([Anders et al. 2014](#_ENREF_2)) run in stranded mode with default parameters. Total RNA-seq data was aligned using the same methods as the RPF data, without any of the preprocessing steps. All quantification was performed using gene models for 19438 protein-coding genes from UCSC Known Genes ([Hsu et al. 2006](#_ENREF_7)). For coding sequence (CDS) and untranslated region (UTR) quantification, the model for each gene with the longest CDS was used. Quantification values were normalized using DESeq2 ([Anders and Huber 2010](#_ENREF_1); [Love et al. 2014](#_ENREF_15)). The distribution of reads across exonic, intronic, and intergenic regions were generated using RNA-SeQC ([DeLuca et al. 2012](#_ENREF_4)) with default parameters. Following quantification, only those genes meeting the following criteria were retained for further analysis: at least 10 mapped reads in all wild-type RPF libraries, at least 1 mapped read in all total RNA libraries. This yielded a set of 9942 genes.

Oscillations in quantification data for these genes were detected using the JTK_CYCLE algorithm ([Hughes et al. 2010](#_ENREF_10)), with parameters set to handle replicates and to look for oscillating transcripts with period lengths of 24h. The JTK_CYCLE algorithm functions by comparing the data from a given gene to a set of reference cosine waves with different phases and periods. The phase of the cosine curve with the best correlation to the data is used determine the peak phase for that gene. For this reason, JTK_CYCLE can return peak phases that are not limited to time points sampled in the actual experiment. Genes with FDR < 0.2 were identified as oscillating in the RPF data, while genes with FDR < 0.05 were identified as oscillating in the total RNA-seq data. Those genes that met these FDR thresholds in the si*ARNTL* data were removed from further analysis, with the exception of those genes that showed a phase difference ≥ 4hrs between the wild-type and si*ARNTL* data. This set of phase-shifted genes was manually inspected for phase differences. The lines in all expression traces were plotted using a moving average across both replicates. The moving average is calculated across a three time point window (current, previous, and next time points) using data from both replicates.

**ChIP-Seq Analysis**

Hoffman and colleagues performed ChIP-seq to identify binding sites for ARNTL, CLOCK, and CRY1 in un-synchronized U2OS cells ([Hoffmann et al. 2014](#_ENREF_6)). They provided a link to UCSC genome browser tracks that identify the binding peaks for these three clock factors. The UCSC table browser was used to download the locations of these ChIP peaks in BED format. ChIP peaks were assigned to the promoter regions of their nearest UCSC transcripts using the Bioconductor package ChIPpeakAnno v3.2.2 ([Zhu et al. 2010](#_ENREF_16)). Gene promoter regions were defined as 5 kb upstream and 1 kb downstream of the transcriptional start site.

**DAVID, oPossum, and RNA Regulatory Element Enrichment Analyses**

NIH DAVID ([Huang da et al. 2009b](#_ENREF_9); [Huang da et al. 2009a](#_ENREF_8)) analysis were performed using default parameters to test for enrichment of GO terms in the Biological Process ontology. oPOSSUM ([Kwon et al. 2012](#_ENREF_13)) analyses were performed using default parameters, except the promoters were defined as the region spanning 5000 bp upstream of the transcriptional start-site and 1000 bp downstream of the transcriptional start site. For enrichment of RNA regulatory elements, annotated lists of RNA regulatory elements and their target transcripts were downloaded from the AURA database ([Dassi et al. 2014](#_ENREF_3)). Enrichment of a given regulatory element in a set of target genes against the background was implemented using the fisher.test function in R. Fisher test *p*-values were corrected for multiple testing by the Benjamini-Hochberg method using the p.adjust function in R. Regulatory elements were required to be present in at least 10% of the genes in a given target set, for inclusion in the enrichment test. The set of 9942 expressed genes identified above served as the “background” set for all enrichment tests.

**Translational Efficiency**

Translational efficiencies were calculated as previously described ([Ingolia et al. 2011](#_ENREF_12)). Briefly, the RPF density was calculated for each gene by dividing the DESeq2-normalized RPF reads mapping to a gene’s coding sequence, by the length of the coding sequence. Similarly, the RNA-seq read density is calculated by dividing the DESeq2-normalized RNA reads mapping to a gene, by the length of the gene. The translational efficiency for a given gene is calculated by dividing the gene’s RPF density by its RNA-seq read density. Translational efficiency values were analyzed for oscillations using the JTK_CYCLE algorithm, with parameters set to handle replicates and to look for oscillating transcripts with period lengths of 24h. Genes with p < 0.01 were identified as having rhythms in translational efficiency. Trend lines for translational efficiency are plotted in the same manner described for the RPF and RNA data.

**Identifying and Quantifying Upstream Open Reading Frames**

Nucleotide sequences for the 5' UTR and CDS of genes from the UCSC know genes annotation were downloaded using the UCSC table browser. As with the quantification, for genes with multiple isoforms, the model for each gene with the longest CDS was used. Upstream Open Reading Frames (uORFs) were identified by searching the 5' UTR for canonical start codons (“ATG”) followed by at least 3 codons and a canonical stop codon (“TAG”, “TAA”, or “TGA”). Only start codons out-of-frame with the main CDS of the gene were considered. This list of uORFs was filtered for those that ended at least 30bp upstream of the main CDS. This reduced noise arising from RPF reads mapping to the main CDS, rather than those mapping to a non-overlapping uORF. These uORFs were quantified in the RPF and RNA-seq data, and normalized using the same methods as for full protein-coding transcripts. Only those uORFs with an average of at least 10 reads mapping across all wild-type RPF libraries were retained for further analysis.

**References**

Anders S, Huber W. 2010. Differential expression analysis for sequence count data. *Genome biology* **11**(10): R106.

Anders S, Pyl PT, Huber W. 2014. HTSeq &#150; A Python framework to work with high-throughput sequencing data. *bioRxiv*.

Dassi E, Re A, Leo S, Tebaldi T, Pasini L, Peroni D, Quattrone A. 2014. Aura 2. *Translation* **2**(1): e27738.

DeLuca DS, Levin JZ, Sivachenko A, Fennell T, Nazaire MD, Williams C, Reich M, Winckler W, Getz G. 2012. RNA-SeQC: RNA-seq metrics for quality control and process optimization. *Bioinformatics* **28**(11): 1530-1532.

Dobin A, Davis CA, Schlesinger F, Drenkow J, Zaleski C, Jha S, Batut P, Chaisson M, Gingeras TR. 2013. STAR: ultrafast universal RNA-seq aligner. *Bioinformatics* **29**(1): 15-21.

Hoffmann J, Symul L, Shostak A, Fischer T, Naef F, Brunner M. 2014. Non-circadian expression masking clock-driven weak transcription rhythms in U2OS cells. *PloS one* **9**(7): e102238.

Hsu F, Kent WJ, Clawson H, Kuhn RM, Diekhans M, Haussler D. 2006. The UCSC Known Genes. *Bioinformatics* **22**(9): 1036-1046.

Huang da W, Sherman BT, Lempicki RA. 2009a. Bioinformatics enrichment tools: paths toward the comprehensive functional analysis of large gene lists. *Nucleic acids research* **37**(1): 1-13.

-. 2009b. Systematic and integrative analysis of large gene lists using DAVID bioinformatics resources. *Nat Protoc* **4**(1): 44-57.

Hughes ME, Hogenesch JB, Kornacker K. 2010. JTK_CYCLE: an efficient nonparametric algorithm for detecting rhythmic components in genome-scale data sets. *J Biol Rhythms* **25**(5): 372-380.

Ingolia NT, Brar GA, Rouskin S, McGeachy AM, Weissman JS. 2012. The ribosome profiling strategy for monitoring translation in vivo by deep sequencing of ribosome-protected mRNA fragments. *Nat Protoc* **7**(8): 1534-1550.

Ingolia NT, Lareau LF, Weissman JS. 2011. Ribosome profiling of mouse embryonic stem cells reveals the complexity and dynamics of mammalian proteomes. *Cell* **147**(4): 789-802.

Kwon AT, Arenillas DJ, Worsley Hunt R, Wasserman WW. 2012. oPOSSUM-3: advanced analysis of regulatory motif over-representation across genes or ChIP-Seq datasets. *G3 (Bethesda)* **2**(9): 987-1002.

Langmead B, Trapnell C, Pop M, Salzberg SL. 2009. Ultrafast and memory-efficient alignment of short DNA sequences to the human genome. *Genome biology* **10**(3): R25.

Love MI, Huber W, Anders S. 2014. Moderated estimation of fold change and dispersion for RNA-seq data with DESeq2. *Genome biology* **15**(12): 550.

Zhu LJ, Gazin C, Lawson ND, Pages H, Lin SM, Lapointe DS, Green MR. 2010. ChIPpeakAnno: a Bioconductor package to annotate ChIP-seq and ChIP-chip data. *BMC bioinformatics* **11**: 237.
