# Supplementary material for: Ribosome profiling reveals an important role for translational control in circadian gene expression
Source: HighWire-hosted journal article supplement (doi:10.1101/gr.191296.115), 2015-09-03
Supplement: Supplemental_Table_S1.xlsx [file Supplemental_Table_S1.xlsx]

## Sheet: Table_S1
Supplementary Table S1: Mapping statistics for RPF and RNA libraries.
		Filter Stats			Alignment Stats
Sample	Note	TotalReads	QC_Filtered	rRNA_Mapping	TotalInputReads	UniqueReads
WT_RP_rep1_00	WT ribosome profiling replicate 1 CT00	54774995	1784577	40323305	12667113	8757844
WT_RP_rep1_02	WT ribosome profiling replicate 1 CT02	40956566	1132123	31187007	8637436	6048483
WT_RP_rep1_04	WT ribosome profiling replicate 1 CT04	54278098	1721699	42346726	10209673	6958615
WT_RP_rep1_06	WT ribosome profiling replicate 1 CT06	56293495	1965593	42644380	11683522	8338213
WT_RP_rep1_08	WT ribosome profiling replicate 1 CT08	60452943	1537377	46868038	12047528	8599797
WT_RP_rep1_10	WT ribosome profiling replicate 1 CT10	50014831	1507738	38746762	9760331	6869068
WT_RP_rep1_12	WT ribosome profiling replicate 1 CT12	64387335	2884413	47798977	13703945	9467286
WT_RP_rep1_14	WT ribosome profiling replicate 1 CT14	50987403	1994729	38733089	10259585	7370179
WT_RP_rep1_16	WT ribosome profiling replicate 1 CT16	31955852	1168076	24234290	6553486	4645142
WT_RP_rep1_18	WT ribosome profiling replicate 1 CT18	37451421	2405446	28092036	6953939	5042627
WT_RP_rep1_20	WT ribosome profiling replicate 1 CT20	53499709	2401495	40950770	10147444	7335235
WT_RP_rep1_22	WT ribosome profiling replicate 1 CT22	80149801	3249863	61895058	15004880	10786029
WT_RP_rep2_00	WT ribosome profiling replicate 2 CT00	56071156	1032248	45550565	9488343	6261529
WT_RP_rep2_02	WT ribosome profiling replicate 2 CT02	36688749	1107191	27604681	7976877	5143076
WT_RP_rep2_04	WT ribosome profiling replicate 2 CT04	54598639	769937	45554940	8273762	5381239
WT_RP_rep2_06	WT ribosome profiling replicate 2 CT06	80517676	1495844	64468404	14553428	9599399
WT_RP_rep2_08	WT ribosome profiling replicate 2 CT08	57243353	833641	45524206	10885506	7368056
WT_RP_rep2_10	WT ribosome profiling replicate 2 CT10	63679523	1118688	50714890	11845945	7909104
WT_RP_rep2_12	WT ribosome profiling replicate 2 CT12	42552146	1284980	34024934	7242232	4548145
WT_RP_rep2_14	WT ribosome profiling replicate 2 CT14	65054967	1273441	51481519	12300007	8207559
WT_RP_rep2_16	WT ribosome profiling replicate 2 CT16	55899368	956727	44244008	10698633	7279866
WT_RP_rep2_18	WT ribosome profiling replicate 2 CT18	64758993	1574065	51799884	11385044	7737034
WT_RP_rep2_20	WT ribosome profiling replicate 2 CT20	60896904	1629145	47062968	12204791	8444102
WT_RP_rep2_22	WT ribosome profiling replicate 2 CT22	50176171	1426140	39515185	9234846	6296846
Bmal1_kd_RP_rep1_00	Bmal1 KD ribosome profiling replicate 1 CT00	40851520	1659972	31871973	7319575	4761334
Bmal1_kd_RP_rep1_02	Bmal1 KD ribosome profiling replicate 1 CT02	51091304	1920864	39809691	9360749	6393652
Bmal1_kd_RP_rep1_04	Bmal1 KD ribosome profiling replicate 1 CT04	48192260	1444231	38511710	8236319	5678211
Bmal1_kd_RP_rep1_06	Bmal1 KD ribosome profiling replicate 1 CT06	56710731	1254882	45969188	9486661	6564496
Bmal1_kd_RP_rep1_08	Bmal1 KD ribosome profiling replicate 1 CT08	52344217	1833253	42072788	8438176	5853276
Bmal1_kd_RP_rep1_10	Bmal1 KD ribosome profiling replicate 1 CT10	51218178	2338554	39892456	8987168	6502968
Bmal1_kd_RP_rep1_12	Bmal1 KD ribosome profiling replicate 1 CT12	50429899	1609827	40103055	8717017	5715700
Bmal1_kd_RP_rep1_14	Bmal1 KD ribosome profiling replicate 1 CT14	53013772	2069158	41231695	9712919	6742376
Bmal1_kd_RP_rep1_16	Bmal1 KD ribosome profiling replicate 1 CT16	50932709	1346516	40389500	9196693	6454328
Bmal1_kd_RP_rep1_18	Bmal1 KD ribosome profiling replicate 1 CT18	56023360	1912433	44851571	9259356	6487748
Bmal1_kd_RP_rep1_20	Bmal1 KD ribosome profiling replicate 1 CT20	55754389	3163391	41478970	11112028	6943284
Bmal1_kd_RP_rep1_22	Bmal1 KD ribosome profiling replicate 1 CT22	44205031	2225196	34567339	7412496	5354021
Bmal1_kd_RP_rep2_00	Bmal1 KD ribosome profiling replicate 2 CT00	51085679	1905248	40653090	8527341	5334422
Bmal1_kd_RP_rep2_02	Bmal1 KD ribosome profiling replicate 2 CT02	49883060	1794496	38308786	9779778	6402407
Bmal1_kd_RP_rep2_04	Bmal1 KD ribosome profiling replicate 2 CT04	37681824	830093	30118677	6733054	4469187
Bmal1_kd_RP_rep2_06	Bmal1 KD ribosome profiling replicate 2 CT06	40849027	1151059	32359688	7338280	5166831
Bmal1_kd_RP_rep2_08	Bmal1 KD ribosome profiling replicate 2 CT08	55125506	1231648	44326804	9567054	6688240
Bmal1_kd_RP_rep2_10	Bmal1 KD ribosome profiling replicate 2 CT10	49337683	1907131	38126321	9304231	6642690
Bmal1_kd_RP_rep2_12	Bmal1 KD ribosome profiling replicate 2 CT12	55397176	1351852	44398583	9646741	6382651
Bmal1_kd_RP_rep2_14	Bmal1 KD ribosome profiling replicate 2 CT14	57944953	1305170	46225198	10414585	7193597
Bmal1_kd_RP_rep2_16	Bmal1 KD ribosome profiling replicate 2 CT16	60786042	1422237	48248058	11115747	7640720
Bmal1_kd_RP_rep2_18	Bmal1 KD ribosome profiling replicate 2 CT18	55445664	921125	45102599	9421940	6623615
Bmal1_kd_RP_rep2_20	Bmal1 KD ribosome profiling replicate 2 CT20	36120358	929687	28722226	6468445	4498477
Bmal1_kd_RP_rep2_22	Bmal1 KD ribosome profiling replicate 2 CT22	51812192	1142753	41058764	9610675	6935006
WT_RNA_rep1_00	WT total RNA-seq replicate 1 CT00	NA	NA	NA	33216644	25431618
WT_RNA_rep1_02	WT total RNA-seq replicate 1 CT02	NA	NA	NA	34741769	26216189
WT_RNA_rep1_04	WT total RNA-seq replicate 1 CT04	NA	NA	NA	31811581	24062397
WT_RNA_rep1_06	WT total RNA-seq replicate 1 CT06	NA	NA	NA	34295689	26116798
WT_RNA_rep1_08	WT total RNA-seq replicate 1 CT08	NA	NA	NA	31666044	24208868
WT_RNA_rep1_10	WT total RNA-seq replicate 1 CT10	NA	NA	NA	31227335	23985557
WT_RNA_rep1_12	WT total RNA-seq replicate 1 CT12	NA	NA	NA	28754100	22138382
WT_RNA_rep1_14	WT total RNA-seq replicate 1 CT14	NA	NA	NA	33505289	25544382
WT_RNA_rep1_16	WT total RNA-seq replicate 1 CT16	NA	NA	NA	28933283	22024041
WT_RNA_rep1_18	WT total RNA-seq replicate 1 CT18	NA	NA	NA	31882834	24024492
WT_RNA_rep1_20	WT total RNA-seq replicate 1 CT20	NA	NA	NA	32603330	24818739
WT_RNA_rep1_22	WT total RNA-seq replicate 1 CT22	NA	NA	NA	32718339	24974401
WT_RNA_rep2_00	WT total RNA-seq replicate 2 CT00	NA	NA	NA	28588951	21428857
WT_RNA_rep2_02	WT total RNA-seq replicate 2 CT02	NA	NA	NA	30049203	22549309
WT_RNA_rep2_04	WT total RNA-seq replicate 2 CT04	NA	NA	NA	30218054	22553499
WT_RNA_rep2_06	WT total RNA-seq replicate 2 CT06	NA	NA	NA	33972438	25468504
WT_RNA_rep2_08	WT total RNA-seq replicate 2 CT08	NA	NA	NA	30529841	22906237
WT_RNA_rep2_10	WT total RNA-seq replicate 2 CT10	NA	NA	NA	33561603	25257379
WT_RNA_rep2_12	WT total RNA-seq replicate 2 CT12	NA	NA	NA	30093373	22586953
WT_RNA_rep2_14	WT total RNA-seq replicate 2 CT14	NA	NA	NA	33370385	24957254
WT_RNA_rep2_16	WT total RNA-seq replicate 2 CT16	NA	NA	NA	32377099	24214403
WT_RNA_rep2_18	WT total RNA-seq replicate 2 CT18	NA	NA	NA	34060037	25251338
WT_RNA_rep2_20	WT total RNA-seq replicate 2 CT20	NA	NA	NA	30529234	22677654
WT_RNA_rep2_22	WT total RNA-seq replicate 2 CT22	NA	NA	NA	28879555	21548406
Bmal1_kd_RNA_rep1_00	Bmal1 KD total RNA-seq replicate 1 CT00	NA	NA	NA	30029609	21953482
Bmal1_kd_RNA_rep1_02	Bmal1 KD total RNA-seq replicate 1 CT02	NA	NA	NA	33947469	24492748
Bmal1_kd_RNA_rep1_04	Bmal1 KD total RNA-seq replicate 1 CT04	NA	NA	NA	34611402	25243172
Bmal1_kd_RNA_rep1_06	Bmal1 KD total RNA-seq replicate 1 CT06	NA	NA	NA	41322238	30124006
Bmal1_kd_RNA_rep1_08	Bmal1 KD total RNA-seq replicate 1 CT08	NA	NA	NA	31226240	22603759
Bmal1_kd_RNA_rep1_10	Bmal1 KD total RNA-seq replicate 1 CT10	NA	NA	NA	33911754	24292678
Bmal1_kd_RNA_rep1_12	Bmal1 KD total RNA-seq replicate 1 CT12	NA	NA	NA	35895001	26285885
Bmal1_kd_RNA_rep1_14	Bmal1 KD total RNA-seq replicate 1 CT14	NA	NA	NA	35514076	25854647
Bmal1_kd_RNA_rep1_16	Bmal1 KD total RNA-seq replicate 1 CT16	NA	NA	NA	31629965	24739348
Bmal1_kd_RNA_rep1_18	Bmal1 KD total RNA-seq replicate 1 CT18	NA	NA	NA	30516589	21972345
Bmal1_kd_RNA_rep1_20	Bmal1 KD total RNA-seq replicate 1 CT20	NA	NA	NA	28513966	20655499
Bmal1_kd_RNA_rep1_22	Bmal1 KD total RNA-seq replicate 1 CT22	NA	NA	NA	30146725	21294985
Bmal1_kd_RNA_rep2_00	Bmal1 KD total RNA-seq replicate 2 CT00	NA	NA	NA	31060141	22946715
Bmal1_kd_RNA_rep2_02	Bmal1 KD total RNA-seq replicate 2 CT02	NA	NA	NA	29580447	21834698
Bmal1_kd_RNA_rep2_04	Bmal1 KD total RNA-seq replicate 2 CT04	NA	NA	NA	31649121	23015696
Bmal1_kd_RNA_rep2_06	Bmal1 KD total RNA-seq replicate 2 CT06	NA	NA	NA	30215340	22036968
Bmal1_kd_RNA_rep2_08	Bmal1 KD total RNA-seq replicate 2 CT08	NA	NA	NA	32455195	23481837
Bmal1_kd_RNA_rep2_10	Bmal1 KD total RNA-seq replicate 2 CT10	NA	NA	NA	27937381	20343748
Bmal1_kd_RNA_rep2_12	Bmal1 KD total RNA-seq replicate 2 CT12	NA	NA	NA	32762674	23763490
Bmal1_kd_RNA_rep2_14	Bmal1 KD total RNA-seq replicate 2 CT14	NA	NA	NA	50508007	35624611
Bmal1_kd_RNA_rep2_16	Bmal1 KD total RNA-seq replicate 2 CT16	NA	NA	NA	35651925	25831560
Bmal1_kd_RNA_rep2_18	Bmal1 KD total RNA-seq replicate 2 CT18	NA	NA	NA	46346587	32627158
Bmal1_kd_RNA_rep2_20	Bmal1 KD total RNA-seq replicate 2 CT20	NA	NA	NA	34752119	25309481
Bmal1_kd_RNA_rep2_22	Bmal1 KD total RNA-seq replicate 2 CT22	NA	NA	NA	38906973	27893959
