# Supplementary material for: Ribosome profiling reveals an important role for translational control in circadian gene expression
Source: HighWire-hosted journal article supplement (doi:10.1101/gr.191296.115), 2015-09-03
Supplement: Supplemental_Table_S2.xlsx [file Supplemental_Table_S2.xlsx]

## Sheet: Table_S2
Supplementary Table S2: siARNTL RPF cyclers.
Genes that maintain RPF oscillations in the siARNTL data with a statistical cutoff of FDR < 0.2. Gene symbol, UCSC Gene ID, JTK cycling statistics, circadian period, peak phase (LAG), amplitude, and RPF numbers for both replicates are indicated. This table lists information from both the wild-type and siARNTL (labeled as KD) datasets.
Gene_Symbol	Transcript_ID	WT.FDR	WT.ADJP	WT.PER	WT.LAG	WT.AMP	KD.FDR	KD.ADJP	KD.PER	KD.LAG	KD.AMP	Shifted_in_KD	WT.CT00_rep1	WT.CT00_rep2	WT.CT02_rep1	WT.CT02_rep2	WT.CT04_rep1	WT.CT04_rep2	WT.CT06_rep1	WT.CT06_rep2	WT.CT08_rep1	WT.CT08_rep2	WT.CT10_rep1	WT.CT10_rep2	WT.CT12_rep1	WT.CT12_rep2	WT.CT14_rep1	WT.CT14_rep2	WT.CT16_rep1	WT.CT16_rep2	WT.CT18_rep1	WT.CT18_rep2	WT.CT20_rep1	WT.CT20_rep2	WT.CT22_rep1	WT.CT22_rep2	KD.CT00_rep1	KD.CT00_rep2	KD.CT02_rep1	KD.CT02_rep2	KD.CT04_rep1	KD.CT04_rep2	KD.CT06_rep1	KD.CT06_rep2	KD.CT08_rep1	KD.CT08_rep2	KD.CT10_rep1	KD.CT10_rep2	KD.CT12_rep1
TUBA1C	uc010smh.1	0.000550241	5.53451e-08	24	7	511.326	0.00501822	5.65319e-05	24	8	157.441	FALSE	3888.89	4143.78	4139.05	4170.98	4467.8	4334.58	4214.1	4594.36	4312.79	4262.03	4244.88	4197.14	3690.81	4176.17	3274	3571.48	3223.02	3611.45	3093.88	3434.52	3171.27	3489.43	3434.07	3234.74	3012.37	2934.78	2950.6	3009.74	3236.28	3295.42	3279.4	3099.81	3426.29	3100.57	2956.94	2937.75	3017.21
LAMB1	uc003vev.2	0.00259671	5.22373e-07	24	18	132.383	0.0239819	0.00117956	24	19.5	254.711	FALSE	1127.94	1170.54	1042.18	947.511	994.676	1029.09	1137.82	993.806	1087.15	1067.16	1120.47	1199.18	1274.37	1206.51	1195.44	1257.02	1344.11	1249.59	1405.4	1458.97	1572.3	1374.41	1241.63	1231.91	3141.06	2631.78	2564.6	2804.34	2436.04	2365.64	2384.22	2399.29	2960.68	2749.22	2597.45	2741.34	2647.24
RANGAP1	uc003azs.3	0.00622664	3.75778e-06	24	5	433.521	0.100909	0.0134079	24	7	198.794	FALSE	2866.97	2914.11	2734.65	3160.78	3236.82	3077.35	2882.28	2985.4	2595.41	2861.79	2729.36	2661.18	2384.11	2480.84	2319.08	2450	2294.88	2227.98	2121.88	2274.28	2153.91	2362.35	2235.18	2195.07	3451.07	3503.2	3009.48	3461.2	3390.27	3554.34	3283.8	3515.12	3059.37	3745.76	3326.81	3450.45	3222.19
CD97	uc002myl.3	0.0109447	1.10086e-05	24	5.5	102.984	0.031144	0.00191087	24	10.5	84.3655	TRUE	831.966	878.922	768.922	1007.79	915.908	880.306	886.854	826.4	820.733	752.318	881.656	813.618	764.326	827.887	585.155	719.361	673.467	617.929	681.405	584.248	698.997	688.61	706.282	735.615	1131.83	1141.86	1094.75	1057.47	1095.59	1153.4	1106.33	1175.88	1153.9	1352.01	1174.05	1259.03	1267.38
TMEM138	uc010rli.2	0.0255473	4.13437e-05	24	6	42.5474	0.0776988	0.00895623	24	8.5	16.676	FALSE	214.986	222.28	226.652	245.919	239.968	215.737	241.729	232.508	194.799	210.45	215.476	232.912	170.503	217.568	143.596	171.276	149.974	192.245	137.784	166.692	154.74	164.423	175.68	176.548	195.951	172.781	215.897	195.226	237.293	303.061	206.749	197.647	215.092	236.293	205.718	233.614	234.977
TUBB4B	uc004cmh.1	0.0255473	5.65319e-05	24	6	1902.42	0.000865572	5.22373e-07	24	9	858.122	FALSE	11784.5	13563.1	12891.6	13149.4	14227.7	13730.3	13653.9	13712.7	13007.1	13616.3	13618.1	13087.1	10628.5	13325.3	10315.6	11678.1	10308.6	11201.7	10652	10835	10428	10892.7	10805.5	10496.7	7700.56	7977.99	8563.93	7967.67	9181.24	8774.04	9576.46	9276.92	9722.15	8935.98	9128.48	8705.73	9046.62
TACC3	uc003gdo.3	0.0255473	5.65319e-05	24	5.5	169.11	0.00199662	5.42231e-06	24	7	275.327	FALSE	2182.25	1825.14	2281.35	1827.51	2502.26	2065.62	2207.9	1998.24	1926.5	1980.22	2056	1866.44	1822.62	1867.69	1773.41	1741.06	1678.01	1579.15	1906.43	1650.42	1855.1	1652.66	1790.04	1761.55	1196.18	1297.11	1421.87	1417.42	1527.26	1377.01	1566.02	1408.55	1556.25	1434.19	1138.72	1240.43	1402.36
GPN1	uc010ymc.2	0.0255473	5.65319e-05	24	5	106.157	0.0239819	0.00117956	24	3	166.666	FALSE	1501.96	1411.17	1465.82	1424.88	1447.14	1552.31	1337.98	1507.98	1387.94	1319.04	1353.91	1298.33	1293.47	1443.86	1265.44	1243.62	1188.47	1256.46	1210	1237.81	1161.44	1294.31	1279.62	1110.29	2015.07	1948.17	1921.27	2133.25	1840.29	2033.15	1915.73	1898.92	1996.56	1988.97	1741.33	1918.53	1594.84
ARID5B	uc001jlt.2	0.0272631	7.67819e-05	24	18	204.414	0.0405356	0.00303752	24	18	112.733	FALSE	608.145	611.779	639.709	530.413	575.19	498.427	635.887	547.39	741.954	634.664	596.15	682.999	884.854	697.912	922.606	853.403	871.546	856.519	961.984	924.234	971.125	864.276	902.142	923.932	541.058	460.75	538.653	427.057	436.721	547.274	477.283	515.385	670.581	495.188	459.229	440.352	587.443
PFKP	uc001igp.3	0.0272631	7.67819e-05	24	4	92.9377	0.067985	0.00727581	24	6	167.403	FALSE	1506.37	1482.54	1423.46	1678.03	1580.86	1594.47	1467.31	1456.16	1483.91	1430.07	1504.74	1380.16	1358.15	1308.23	1177.49	1172.13	1395.04	1150.03	1420.43	1237.81	1397.99	1332.25	1386.45	1277.03	1570.53	1745.34	1622.5	1390.99	1661.05	1671.25	1603.41	1578.68	1553.72	1479.4	1356.91	1430.63	1442.36
KPNA2	uc002jgl.3	0.0321897	0.000103608	24	6	555.783	0.00135071	2.58131e-06	24	8.5	667.65	FALSE	6574.74	5491.73	7767.6	6075.64	6449.83	5961.28	6383.5	6778.61	5225.19	6517.32	5329.44	6379.9	5273.85	5255.53	4988.18	5461.48	4603.91	5219.79	4950.21	4867.08	5092.18	4972.05	5059.12	4747.17	3766.93	3355.46	4023.54	3680.83	4271.28	4322.29	4702.45	4415.8	4453.67	4619.01	3717.47	4093.41	4252.09
SHCBP1	uc002eec.4	0.0321897	0.000103608	24	5	164.678	0.00368554	3.0027e-05	24	6.5	226.085	FALSE	1722.83	1437.68	2101.3	1395.95	1749.38	1470.48	1559.69	1602.31	1241.84	1493.04	1458.05	1413.21	1415.47	1237.59	1263.65	1198.93	1222.43	1256.46	1270.12	1194.9	1225.47	1195.93	1300.98	1271.14	1093.81	951.549	1173.26	1124.58	1103.16	1126.91	1163.52	1125.84	979.301	1111.6	933.004	992.342	964.906
EDIL3	uc003kio.1	0.0383468	0.000138924	24	18.5	865.182	0.0519784	0.00474194	24	18	337.429	FALSE	3588.5	3548.32	4395.35	4356.62	3339.4	3853.51	4024.72	3973.9	4043.51	4151	3945.01	4497.72	4584.49	4600	5244.86	5165.1	4807.65	5200.9	5363.56	5743.45	6040.18	5631.15	5262.1	5826.07	1073.34	911.484	1216.88	1167.29	1325.31	1209.3	1376.86	1165.87	1389.24	1368.44	1714.32	1443.03	1879.82
TYMS	uc010dka.1	0.0383468	0.000185139	24	6	695.598	0.127494	0.0197614	24	7.5	251.071	FALSE	7617.27	7949.05	7761.24	8269.62	8285.31	7597.91	7504.39	7804.3	7691.69	7307.75	7335.16	7283.22	7153.8	7063.89	6792.11	6800.42	7026.13	6707.97	6553.52	6444.88	6113.11	6675.3	6290.07	6341.98	4714.51	4745.22	5068.14	5515.14	4988.21	5408.01	4786.03	5248.92	4557.42	5317.62	4534.11	4759.11	4894.52
CDC20	uc001ciy.3	0.0383468	0.000185139	24	6	655.166	0.00691322	0.000103608	24	10.5	426.17	TRUE	4034.67	4300.81	4884.67	3749.06	5718.93	4490.8	5431.98	4676.73	4673.74	4489.05	5225.29	4615.75	3621.73	4447.42	3379.9	3881.27	3647.48	3698.99	3802.84	3408.11	3985.88	3562.5	3913.63	3519.18	2202.25	2296.24	2431.57	2430.16	2872.76	2833.47	3074.85	3079.8	2689.91	2960.85	2732.52	2803.37	3197.19
CAD	uc002rji.3	0.0383468	0.000185139	24	6	314.027	0.0275044	0.00150497	24	4	229.355	FALSE	2968.57	2852.93	2736.77	2883.52	3158.05	2898.81	2700.59	2767.51	2996.46	2540.31	2878.4	2665.9	2600.18	2664.5	2408.83	2491.7	2532.58	2548.96	2279.7	2307.28	2290.86	2359.54	2318.27	2487.36	3617.77	3958.94	3454.36	3573.05	3476.1	3545.51	3182.62	3412.55	3264.34	3166.32	3081.61	3036.98	2842.22
ENAH	uc001hpc.1	0.0383468	0.000185139	24	19	297.274	0.031144	0.00191087	24	17	145.194	FALSE	1940.76	1810.87	2092.82	2044.5	1808	1770.53	1850.69	1894.61	1988.09	2101.19	1827.95	2009.65	2140.11	1878.99	2360.36	2225.1	2116.61	2214.25	2567.8	2417.86	2579	2545.05	2387.11	2499.13	1392.13	1382.25	1380.43	1488.6	1461.63	1329.94	1467.04	1433.57	1427.2	1485.56	1708.08	1395.48	1739.83
YWHAH	uc003alz.3	0.0383468	0.000185139	24	5	271.23	0.00884927	0.000185139	24	5	358.003	FALSE	3498.67	3387.22	3238.79	3681.55	3416.34	3444.35	2951.56	3228.54	3085.27	3138.52	2950.22	3123.85	2867.69	3051.6	2771.41	2972.76	2450.52	2790.98	2640.45	2822.21	2760.41	2847.19	2769.34	2710.99	2597.08	2381.38	2758.69	2704.7	2678.39	2553.95	2551.38	2459.34	2578.57	2428.68	2323.16	2162.48	2117.29
FOXM1	uc001qle.3	0.0383468	0.000185139	24	5	66.0217	0.00501822	5.65319e-05	24	7.5	107.313	FALSE	1123.52	1013.51	1243.41	1051.18	1241.97	1118.36	1160.92	1125.34	1153.04	997.566	1063.01	1016.63	958.347	966.339	954.915	966.595	1004.54	968.089	949.458	968.795	996.026	934.543	1022.03	986.704	698.988	733.694	691.308	711.762	734.6	779.719	824.798	780.582	733.843	770.52	646.245	638.82	714.93
APBB2	uc003gvn.3	0.041328	0.000245257	24	18.5	164.296	0.127494	0.0197614	24	18	98.4406	FALSE	951.239	883.001	936.263	1203.07	884.767	895.184	893.013	961.919	1012.67	974.367	942.707	1125.22	1073	1059.58	1121.85	1133.4	1163	1138.02	1270.12	1265.87	1410.44	1219.82	1163.29	1231.91	892.014	738.702	931.194	819.543	764.893	803.258	864.389	830.62	807.227	926.679	1084.69	905.512	934.909
AGO1	uc001bzl.3	0.041328	0.000245257	24	8.5	56.9949	0.180872	0.0343842	24	1	44.3828	TRUE	616.98	725.978	735.03	860.716	688.763	766.238	812.95	833.043	847.948	813.63	808.035	791.586	781.964	788.33	725.161	713.403	761.188	751.814	588.714	742.688	679.432	677.368	724.088	637.533	1038.25	1016.65	1066.4	917.156	1007.23	941.547	798.405	865.646	969.179	906.132	835.34	895.175	832.419
ABAT	uc002czd.4	0.041328	0.000245257	24	18.5	20.3124	0.0154744	0.00055099	24	18	62.4559	FALSE	60.3727	99.9239	93.2027	86.7949	98.9181	91.7502	80.0632	93.0032	127.479	81.1973	104.147	97.5712	105.83	104.545	132.827	123.617	110.358	116.72	147.805	158.44	186.755	129.29	146.005	145.161	225.197	202.83	143.932	193.193	174.183	211.848	151.763	197.647	184.726	234.238	253.511	254.288	279.973
CCNB1	uc003jvm.3	0.0439924	0.000323018	24	7	827.118	0.00308165	1.54982e-05	24	10	560.182	FALSE	7637.89	6174.89	10127.3	6767.59	8288.97	7208.59	8819.27	7457.53	7267.72	7491.69	7868.46	7585.38	7105.29	6645.7	5795.91	6535.31	6097.99	6629.01	6152.69	5718.7	6577.33	5626.93	6268.7	5206.19	3895.61	3573.32	4383.37	4266.5	5041.22	4710.68	5012.57	4983.72	5007.85	5058.72	4689.96	4972.05	5264.49
NUDT21	uc002eja.3	0.0439924	0.000323018	24	5.5	195.385	0.0154744	0.00055099	24	5.5	205.474	FALSE	2472.34	2404.29	2586.37	2468.83	2575.53	2432.62	2545.09	2479.2	2472.23	2515.46	2427.7	2275.61	2376.76	2136.12	2231.13	2234.04	2091.14	2291.49	2239.62	2190.1	2134.34	2240.09	2101.04	2136.23	2167.15	2078.38	2239.66	2293.91	2282.06	2347.98	2201.66	2121.58	2201.53	2149.24	1957.44	2106.66	1912.31
TALDO1	uc001lqz.3	0.0439924	0.000323018	24	6	174.652	0.0462294	0.00380362	24	4	142.567	FALSE	2183.73	2481.78	2058.93	2517.05	2399.68	2373.11	2103.2	2314.45	2106.98	2149.24	2264.29	2138.7	2062.21	2218.06	1924.19	2021.06	1921.36	1956.78	1876.37	1868.27	2006.28	1977.3	1898.06	1961.64	2386.5	2426.45	2337.8	2470.83	2322.45	2356.81	2223.66	2154.11	2163.57	2371.15	2171.47	2044.64	1964.81
ENC1	uc031skd.1	0.0439924	0.000323018	24	18	137.488	0.0355671	0.00241479	24	17	430.013	FALSE	418.192	469.03	474.486	441.207	410.327	411.636	569.681	407.886	560.047	445.756	563.829	498.872	574.714	618.796	604.899	649.361	520.664	640.243	846.747	663.468	910.652	671.746	792.935	698.344	704.837	603.482	708.754	835.812	734.6	732.642	855.591	705.526	1366.47	934.898	1036.9	1134.99	1517.35
PDHA1	uc004czh.4	0.0439924	0.000323018	24	5	48.6662	0.0884636	0.0109801	24	4.5	81.6761	FALSE	1164.75	1117.52	1292.13	1297.1	1271.28	1267.14	1139.36	1214.36	1197.44	1194.76	1147.41	1136.23	1172.95	1192.38	1107.49	1088.72	1106.41	1089.96	1117.3	1117.33	1138.32	1082.1	1092.07	1102.44	1547.13	1414.8	1570.16	1411.32	1524.74	1565.32	1497.83	1461.09	1487.93	1479.4	1321.58	1575.34	1402.36
ITGB8	uc003suu.3	0.0439924	0.000323018	24	18	47.2066	0.0154744	0.00055099	24	16	46.4007	FALSE	85.4053	81.5705	80.4932	125.37	42.1318	76.8718	90.841	111.604	117.452	89.4827	109.534	116.456	117.589	155.405	138.211	195.106	149.974	151.049	175.362	207.953	220.549	205.178	154.314	198.126	111.136	92.6508	161.378	85.4114	126.22	88.2701	147.364	107.58	131.586	121.229	151.691	169.525	237.477
TMEM19	uc001sws.3	0.0439924	0.000323018	24	5	38.4035	0.0206922	0.000919932	24	10.5	32.893	TRUE	267.996	248.79	307.145	373.7	305.913	260.372	277.142	276.352	234.904	251.877	247.797	272.255	261.635	254.3	202.83	211.489	195.249	214.559	212.939	181.546	249.006	222.042	175.68	227.55	172.553	222.863	187.547	183.025	214.574	220.675	274.933	222.666	174.604	228.074	245.199	305.972	252.475
PLK1	uc002dlz.1	0.0477936	0.000423037	24	6	375.938	0.0462294	0.00380362	24	9	261.362	FALSE	2170.47	2008.67	2690.17	1926.36	3123.25	2375.59	2792.97	2521.72	2283.16	2394.49	2537.23	2308.66	1727.08	2410.2	1777	1946.59	1590.29	1929.31	1926.47	1757.69	1928.02	1856.44	2071.37	1702.7	1207.87	1166.9	1323.73	1279.14	1557.55	1662.42	1658.39	1668.75	1346.22	1534.88	1392.23	1407.88	1497.35
BUB3	uc001lhe.2	0.0477936	0.000423037	24	5	254.464	0.0118068	0.000323018	24	5	275.029	FALSE	3291.05	2891.67	3306.58	3233.11	3456.64	2742.59	3239.48	2903.03	2932.01	2709.34	2941.25	2873.63	2719.24	2664.5	2563.19	2575.1	2422.22	2633.07	2715.6	2492.13	2634.13	2479	2623.33	2406.93	2842.75	2762	2821.93	2855.18	2963.64	3098.28	2819.71	2759.56	3026.47	2625.93	2612	2606.96	2594.75
PLAT	uc003xos.2	0.0477936	0.000423037	24	19.5	128.761	0.0355671	0.00241479	24	19	197.43	FALSE	655.265	711.703	459.659	619.619	584.35	696.805	521.951	567.32	600.152	634.664	511.755	549.232	474.764	743.121	766.445	667.233	744.21	700.32	846.747	859.867	761.248	938.758	823.798	874.891	1474.02	1665.21	1410.97	1301.51	1342.98	1326.99	1286.69	1336	1492.99	1481.45	1672.76	1529.86	1419.86
LHPP	uc001lhs.2	0.0477936	0.000423037	24	15.5	45.6783	0.180872	0.0343842	24	17.5	46.9372	FALSE	191.426	265.104	235.125	262.796	223.482	230.615	237.11	280.338	355.221	331.417	307.053	303.73	302.791	372.973	393.095	357.446	325.415	320.98	348.218	344.937	341.495	327.441	286.074	337.402	228.122	242.895	320.575	300.974	285.257	244.214	270.534	275.205	306.19	254.785	328.318	283.231	332.468
MAP2K1	uc010bhq.3	0.0477936	0.000423037	24	3	35.7864	0.0136111	0.000423037	24	1	82.4252	FALSE	587.53	664.8	603.699	677.482	613.659	610.015	565.062	573.963	570.073	599.866	588.968	588.575	508.571	463.391	549.256	495.957	509.345	561.286	511.054	569.394	510.463	557.915	510.422	582.607	915.411	996.622	819.974	933.425	785.088	859.162	745.618	808.103	1029.91	786.958	683.649	709.111	602.441
ODC1	uc010exg.1	0.0507217	0.00055099	24	6	362.211	0.067985	0.00727581	24	3	316.046	FALSE	3623.84	2973.25	2950.71	2982.37	3007.84	2750.03	2674.42	2767.51	2508.04	2505.52	2530.05	2637.57	2584.01	2413.02	2274.21	2380	2255.27	2363.58	2069.27	2066.32	2061.42	2124.85	2128.34	2083.26	3740.61	3495.69	3746.58	3994	3622.51	3536.69	3362.98	3302.46	3947.57	3390.29	2709.66	3127.94	3209.69
DNMT1	uc010xlc.2	0.0507217	0.00055099	24	4	174.687	0.067985	0.00727581	24	5.5	315.609	FALSE	2559.22	2363.51	2325.83	2671.35	2419.83	2452.46	2227.91	2190.89	2250.21	2215.53	2122.44	2289.78	1962.26	2073.96	1997.78	2038.93	1921.36	1939.61	2056.74	2026.71	1673.68	2009.62	1895.68	1951.83	2006.3	1825.47	1971.43	1897.35	1820.09	1894.86	1730.98	1911.43	1832.08	1732.13	1535.61	1558.8	1524.85
CDCA8	uc001cbs.4	0.0507217	0.00055099	24	5	118.676	0.00501822	5.65319e-05	24	8	130.981	FALSE	1264.88	917.668	1340.85	1005.37	1326.24	934.86	1193.25	1108.07	945.347	1103.62	960.664	1007.19	824.59	856.143	861.578	816.169	854.568	839.354	921.902	772.395	928.438	796.82	923.508	814.08	631.721	593.466	809.07	723.964	873.442	717.93	787.407	845.631	708.538	799.286	706.506	634.685	714.93
DAGLB	uc003sqa.3	0.0507217	0.00055099	24	4	56.6865	0.0118068	0.000323018	24	3.5	96.6011	FALSE	817.241	772.881	707.493	851.072	838.972	753.839	871.457	815.771	674.634	730.775	754.166	646.803	683.484	669.656	631.824	640.425	662.149	629.945	683.911	673.37	679.432	638.018	690.851	608.108	1313.16	1474.9	1262.67	1352.35	1284.92	1271.09	1242.7	1240.93	989.423	1243.11	943.394	1199.08	1004.9
TTI1	uc002xhl.3	0.0507217	0.00055099	24	4	47.3467	0.031144	0.00191087	24	5	53.4823	FALSE	662.628	640.329	739.267	684.715	740.054	659.609	662.061	661.652	687.525	656.206	583.581	616.902	627.629	511.425	597.72	530.212	633.852	563.002	593.725	595.801	588.722	614.128	629.125	568.875	596.626	616.003	636.788	673.124	681.587	656.141	593.855	620.463	673.111	616.416	488.321	574.731	629.939
CFL1	uc001oft.3	0.0558795	0.00071381	24	6	915.797	0.0519784	0.00474194	24	1	323.242	FALSE	10633	11805.3	10680.2	12761.3	11745.6	11997	10235.8	12001.4	11236.7	11309.6	10949.8	11102.7	9886.26	11443.5	9333.76	10473.2	9564.37	10353.7	9414.42	10148.4	9440.9	10185.8	9924.75	10194.6	9668.84	9422.84	9202.9	9978.9	9645.72	9836.23	8650.49	8971.69	9734.81	8882.56	8581.97	8323.27	8274.19
KRT17	uc002hxh.2	0.0558795	0.00071381	24	18	470.31	0.0033118	2.16523e-05	24	20	798.301	FALSE	1784.68	1296.97	1290.01	1174.14	1524.07	1068.77	1504.26	1191.77	1757.49	1072.14	1741.76	1353.41	1928.45	1695.33	2281.39	1815.53	2289.22	1522.51	2485.13	1850.12	3400.72	1919.68	2763.4	2018.53	3837.12	3958.94	3266.81	4130.25	3102.49	2895.26	2993.47	2779.57	3871.65	3193.04	3385	2890.2	3909.62
PSMC5	uc002jcb.3	0.0558795	0.00071381	24	5	466.756	0.0776988	0.00895623	24	3	220.438	FALSE	4744.41	4659.72	4562.7	5241.45	4434.83	4379.21	4200.24	4320.66	4198.2	4296.83	4128.16	4249.07	4286.11	3938.82	3537.85	3948.29	3551.27	3819.15	3519.76	3847.12	3535.89	3785.95	3582.45	3719.27	5238.02	4953.06	5318.93	5446	4927.62	5102.01	4968.59	5068.78	5076.17	5081.32	4752.29	4870.74	4757.04
CHD3	uc002gjd.2	0.0558795	0.00071381	24	17	141.393	0.100909	0.0134079	24	15	73.0528	FALSE	911.481	842.216	1063.36	971.621	888.431	1004.29	1036.2	1019.05	1140.15	1042.31	1192.3	1134.66	1250.85	1065.23	1331.86	1167.66	1213.94	1093.39	1340.26	1236.16	1309.06	1264.79	1233.32	1214.25	862.767	841.369	900.663	882.585	817.905	806.2	875.386	898.17	807.227	992.43	1086.77	959.264	1062.4
AURKB	uc002gkn.4	0.0558795	0.00071381	24	4	93.3603	0.0033118	2.16523e-05	24	7	154.11	FALSE	1060.2	781.038	1226.46	974.032	1155.88	1046.45	1013.11	1061.57	982.588	989.281	949.89	978.86	814.301	901.352	906.452	811.701	897.013	813.607	911.881	810.355	914.209	857.25	1048.15	841.543	655.118	693.629	761.093	744.3	848.198	876.816	886.383	848.133	713.599	756.137	644.168	611.944	734.928
SLC39A8	uc003hwb.1	0.0558795	0.00071381	24	6	19.6926	0.0136111	0.000423037	24	5	48.6084	FALSE	117.8	101.963	112.267	192.878	108.077	104.149	113.936	104.961	103.129	107.711	87.986	92.85	76.4326	76.29	77.183	80.4254	76.4018	89.2564	72.6499	64.3663	76.4805	80.1036	75.9698	72.5806	178.403	160.261	150.474	176.924	196.903	197.136	156.162	135.101	134.116	162.323	99.7421	138.514	122.488
VANGL2	uc001fwc.2	0.0558795	0.00071381	24	14	9.35417	0.100909	0.0134079	24	15	34.6187	FALSE	116.328	152.945	173.696	144.658	174.023	183.5	184.761	188.664	191.934	162.395	206.498	188.848	195.491	240.172	204.625	205.532	195.249	164.781	192.898	201.351	184.976	193.935	157.875	215.78	149.156	175.285	161.378	180.991	169.135	185.367	178.156	217.662	164.482	176.706	207.796	202.603	214.979
ENO1	uc001apj.2	0.0609731	0.000919932	24	6	2188.52	0.0592317	0.00588624	24	4.5	1920.1	FALSE	37020.3	39192.6	36688	38691.2	40662.7	38832.6	37368	40591.9	38299.5	37367.3	38634.8	38172.4	36465.7	35161.2	35236.7	34157	35334.4	35450.3	35077.4	35911.4	33905.8	35686.9	34580.5	34825	42579.8	42659.4	42326.8	44967.1	44371.3	43311.2	41347.7	41433.4	43385.3	42477.2	40759.2	39699.9	39141.2
ABLIM1	uc021pyx.1	0.0609731	0.000919932	24	17.5	396.661	0.113943	0.0163087	24	15.5	185.505	FALSE	1565.27	1637.53	1586.56	1680.45	1412.33	1663.9	1744.45	1724.55	1758.92	1872.51	1693.28	1932.54	1949.03	1929.85	2270.62	2094.04	2159.06	2238.28	2347.34	2513.59	2744.41	2522.56	2340.82	2536.4	941.733	906.475	1088.21	972.064	1120.83	1088.66	1152.52	1113.33	1009.67	1337.62	1344.44	1176.34	1414.86
SRRM2	uc002crk.3	0.0609731	0.000919932	24	8	368.373	0.00169817	3.75778e-06	24	14	330.968	TRUE	4351.25	4771.88	4003.48	4973.83	4641.82	4773.49	4866.92	4594.36	4991.72	4552.02	4785.36	4651.94	4369.89	4354.18	4167.88	4040.63	4168.14	4316.92	4073.4	4041.87	3937.86	4171.01	4124.92	3984.09	3351.63	3473.15	3090.17	3536.44	3511.44	3627.9	3800.67	3830.36	4473.91	4066.29	4174.62	3843.26	4144.6
SH3BP5	uc003bzp.2	0.0609731	0.000919932	24	18	247.019	0.0154744	0.00055099	24	17	110.923	FALSE	572.805	632.171	635.473	631.674	619.154	654.65	609.712	697.524	825.03	802.03	790.078	709.752	752.567	873.096	985.43	877.233	814.952	863.384	1029.62	1110.73	1079.62	1017.46	1043.4	990.628	432.846	488.295	503.761	483.998	446.818	467.831	558.663	512.883	528.873	550.665	606.764	525.114	589.942
SORT1	uc001dxm.2	0.0609731	0.000919932	24	17.5	213.658	0.180872	0.0343842	24	15	51.2279	FALSE	1073.46	1456.03	1266.71	1415.24	1174.19	1445.69	1327.2	1485.39	1460.99	1499.66	1476.01	1639.83	1474.27	1489.07	1683.67	1629.36	1570.48	1749.08	1693.49	1975.55	1926.24	1960.43	1706.95	1830.21	620.023	653.564	706.573	610.082	787.612	632.602	714.825	665.497	678.172	684.222	791.703	769.065	799.922
DDX56	uc003tlg.4	0.0609731	0.000919932	24	5	113.058	0.0519784	0.00474194	24	2	83.2696	FALSE	1479.87	1511.09	1345.08	1333.27	1789.68	1606.87	1393.41	1422.95	1426.62	1333.96	1384.43	1366	1321.4	1435.38	1191.85	1175.1	1247.9	1323.4	1237.55	1203.15	1298.39	1214.2	1259.44	1284.87	1947.81	2326.29	1991.05	2094.61	1910.97	2036.1	1810.16	1783.83	2037.05	1964.31	1722.63	1837.9	1797.32
GLA	uc004ehl.1	0.0609731	0.000919932	24	6	94.2661	0.0355671	0.00241479	24	7	71.4351	FALSE	634.65	805.509	639.709	764.277	675.94	778.637	654.363	724.097	577.235	681.063	633.858	755.39	565.895	601.843	547.461	597.233	540.472	557.853	526.085	528.134	444.654	600.075	491.43	474.717	672.666	533.368	619.342	549.074	525.075	614.948	598.254	600.448	599.727	577.376	515.334	564.394	454.956
ARHGAP31	uc003ecj.4	0.0609731	0.000919932	24	18.5	74.3866	0.0154744	0.00055099	24	17.5	53.2441	FALSE	291.556	267.143	213.943	236.275	234.473	223.176	247.888	249.78	303.657	288.333	244.206	300.582	221.949	324.939	353.606	311.276	336.734	338.145	353.229	394.45	419.754	387.87	379.849	366.827	114.061	120.196	111.22	138.285	100.976	117.693	123.17	140.105	159.421	129.447	168.315	117.841	199.981
MICA	uc003ntk.1	0.0609731	0.000919932	24	6	69.57	0.00884927	0.000185139	24	5	133.517	FALSE	615.507	650.525	612.172	600.331	674.109	647.211	612.792	694.867	624.502	697.634	592.559	593.296	543.847	599.017	452.328	616.595	531.983	602.481	413.353	536.386	400.189	569.157	416.647	490.41	959.28	1024.17	889.759	1079.84	939.076	1020.99	936.971	893.166	845.185	914.351	843.652	882.771	744.927
WDR62	uc002odd.2	0.0609731	0.000919932	24	4.5	64.9877	0.00691322	0.000103608	24	5.5	92.2893	FALSE	553.662	556.719	527.443	648.551	729.063	545.542	652.823	560.677	544.291	565.067	669.771	445.365	471.824	457.74	549.256	427.446	455.581	451.432	468.466	382.897	473.112	493.27	460.567	508.065	391.901	370.603	405.625	425.024	474.587	461.947	472.884	450.336	306.19	415.054	338.707	370.061	324.968
C12orf10	uc001scp.4	0.0609731	0.000919932	24	2	46.843	0.180872	0.0343842	24	22.5	24.3132	FALSE	472.674	479.227	470.25	489.427	542.218	406.677	455.745	461.03	375.274	419.243	490.208	406.022	346.886	336.241	416.429	332.127	356.542	405.087	445.92	389.498	455.326	432.841	416.647	427.637	479.64	605.986	427.433	473.83	441.77	520.793	472.884	437.827	526.343	433.546	398.968	399.004	374.963
CSTF1	uc002xxm.1	0.0609731	0.000919932	24	5	43.9655	0.0462294	0.00380362	24	6.5	57.7008	FALSE	799.571	707.624	849.415	778.743	987.349	800.954	836.045	783.884	749.116	763.917	763.144	722.342	799.603	723.342	698.237	668.723	744.21	698.603	716.478	711.33	713.226	705.474	734.771	635.571	655.118	588.458	634.608	575.51	709.356	744.411	582.857	675.504	627.562	647.237	542.347	640.887	597.442
TRIB2	uc002rbv.4	0.0609731	0.000919932	24	17.5	41.5657	0.127494	0.0197614	24	16	42.1414	FALSE	61.8452	65.2564	72.0203	65.0962	56.7863	106.629	124.714	106.289	117.452	135.881	136.468	124.325	114.649	161.057	163.341	154.893	135.825	171.647	210.434	174.944	165.411	167.234	154.314	213.819	76.0405	82.6345	111.22	91.5123	93.4027	91.2124	96.7763	125.093	126.525	106.845	168.315	140.582	202.48
PLCD1	uc003chm.3	0.0609731	0.000919932	24	18	32.1827	0.180872	0.0343842	24	14.5	37.8088	FALSE	122.218	154.984	146.159	176.001	185.013	166.142	155.507	159.434	163.287	178.965	186.746	190.421	167.564	245.823	192.06	189.149	234.865	204.26	235.486	237.66	211.655	205.178	191.112	262.86	163.78	230.375	176.643	203.361	244.867	191.252	195.752	210.157	215.092	263.004	268.057	227.412	287.472
CLIC1	uc003nwr.3	0.0681812	0.00117956	24	6	446.677	0.0592317	0.00588624	24	1	317.068	TRUE	4732.63	4810.62	4355.11	4860.51	4945.9	5138.01	4332.65	4876.03	4597.83	4631.56	4760.22	4601.59	4161.17	4585.87	3972.23	4462.12	4128.53	4414.76	4033.32	4083.13	3751.1	4069.83	3976.55	4201.83	6934.31	7356.97	6439.85	7323.01	6598.78	7246.97	6228.88	6584.91	6807.03	6355.25	6044.78	6373.73	6029.41
KIF2C	uc001cmg.4	0.0681812	0.00117956	24	5	346.734	0.00134368	1.75697e-06	24	8	491.554	FALSE	3862.38	3101.72	4107.27	3061.93	4328.58	3407.16	3789.15	3579.3	3381.77	3372.17	3582.29	3499.97	2970.58	2930.1	2916.8	2899.78	3022.11	2900.83	3452.12	2586.2	3091.24	2824.71	3233.47	2950.31	2491.79	2421.44	3079.26	2869.42	3450.85	3177.72	3092.44	3159.86	3099.85	3178.65	2796.93	2759.95	2934.71
FKBP4	uc001qkz.3	0.0681812	0.00117956	24	5	317.533	0.0136111	0.000423037	24	6.5	330.583	FALSE	3936.01	3599.3	3804.36	4014.26	3808.35	3533.62	3478.13	3611.18	3446.22	3604.16	3460.18	3608.56	3405.66	3226.78	3108.86	3315.31	3149.45	3094.8	2735.64	3355.3	2810.22	3176.04	2941.46	2789.45	4132.51	3846.26	3901.42	3782.51	4175.35	3804.44	3747.88	3992.98	4337.27	3938.9	3547.08	3791.57	3309.68
NUP188	uc004bws.2	0.0681812	0.00117956	24	5	304.503	0.0239819	0.00117956	24	4	200.503	FALSE	3383.82	3003.83	3010.02	2859.41	3539.07	2916.17	2996.21	2900.37	2887.61	2826.99	3000.5	2747.73	2559.02	2695.58	2530.88	2481.27	2495.79	2622.77	2402.46	2516.89	2413.58	2553.48	2324.2	2404.97	2924.64	2992.37	2887.36	3066.68	2971.22	3407.22	2797.72	2954.7	3003.7	2839.62	2655.63	2788.89	2389.77
PPIF	uc001kai.3	0.0681812	0.00117956	24	6	236.989	0.180872	0.0343842	24	3	222.374	FALSE	1619.76	1961.77	1256.12	1673.21	1639.48	1663.9	1416.5	1647.49	1397.97	1453.27	1472.42	1454.13	1290.54	1378.87	1075.18	1292.76	1239.41	1150.03	989.541	1185	983.575	1247.93	1070.7	1151.48	2462.54	2569.18	2150.25	2190.19	2183.6	2309.73	1981.72	2091.56	3008.76	2262.25	1915.88	1947.47	1767.33
PRMT5	uc001whm.1	0.0681812	0.00117956	24	6.5	190.719	0.0776988	0.00895623	24	4.5	139.649	FALSE	2295.64	2149.38	2264.4	1986.64	2374.03	2177.21	2318.75	2214.81	2253.08	2049.82	2181.69	2091.49	2069.56	2085.26	1771.62	1995.74	1994.94	2109.54	1836.29	1879.83	1766.17	1895.79	1917.05	1767.44	2488.86	2541.64	2466.46	2550.14	2476.43	2627.51	2448	2334.24	2583.63	2307.45	2248.35	2300.99	2149.79
RFWD3	uc010cgq.3	0.0681812	0.00117956	24	6	182.768	0.0405356	0.00303752	24	4.5	119.142	FALSE	1429.8	1368.35	1417.1	1451.4	1329.9	1348.98	1345.68	1267.5	1237.55	1332.3	1238.99	1310.92	1267.02	1138.7	1071.59	1106.59	1083.77	1139.74	1064.7	1066.17	1010.25	1069.45	1109.87	1035.75	973.904	921.5	933.375	1092.05	1009.76	979.798	840.195	910.68	862.898	860.928	729.364	789.739	837.418
GTF3C5	uc004ccj.4	0.0681812	0.00117956	24	6	137.087	0.031144	0.00191087	24	5	111.207	FALSE	1369.43	1209.28	1294.25	1253.7	1511.25	1130.76	1273.31	1195.76	1151.6	1171.56	1212.05	1197.61	1034.78	1144.35	1046.46	1094.68	1063.97	1021.3	1027.12	942.388	994.247	1086.32	1013.72	1022.01	973.904	1074.25	1138.37	1106.28	1055.2	1168.11	989.758	1178.38	1090.64	1043.8	966.251	1000.61	997.403
UBE2T	uc001gxx.4	0.0681812	0.00117956	24	5	128.231	0.00501822	5.65319e-05	24	7	199.42	FALSE	1784.68	1533.53	2063.17	1856.45	1826.32	1649.02	1648.99	1631.54	1579.88	1622.29	1556.81	1535.96	1660.94	1384.52	1489.81	1358.3	1536.52	1467.58	1483.06	1364.9	1492.26	1343.49	1527.71	1224.06	1137.68	994.118	1371.71	1122.55	1358.13	1191.65	1231.7	1253.44	1153.9	1123.93	953.784	1170.14	1099.89
CADM3	uc001ftk.2	0.0681812	0.00117956	24	17	116.067	0.067985	0.00727581	24	18.5	57.4832	FALSE	431.444	542.444	427.885	368.878	523.9	448.832	541.966	539.419	618.773	551.81	612.311	624.771	624.69	703.563	662.338	635.957	614.044	724.35	666.374	858.217	853.736	819.306	726.462	906.277	403.6	448.23	407.806	427.057	388.757	461.947	404.701	402.801	415.001	437.655	477.931	481.699	534.948
KNSTRN	uc001zll.3	0.0681812	0.00117956	24	4	99.5222	0.0239819	0.00117956	24	7	96.7823	FALSE	1114.69	829.98	1332.37	1041.54	1247.47	979.495	1142.44	1004.43	770.601	1078.76	836.765	1051.25	811.361	751.597	779.01	778.935	766.847	744.948	829.21	744.338	821.721	685.8	858.222	741.5	564.455	575.937	689.127	508.401	752.271	647.314	646.642	738.051	637.684	575.322	629.622	649.157	579.943
NCLN	uc002lxi.3	0.0681812	0.00117956	24	6.5	98.1562	0.100909	0.0134079	24	2.5	46.0226	TRUE	624.342	897.276	580.399	696.77	811.495	743.92	717.49	811.785	747.684	715.862	689.523	684.572	577.654	940.909	538.486	644.893	565.939	617.929	496.023	551.239	526.471	650.666	496.178	584.568	982.677	1016.65	813.432	937.492	785.088	779.719	785.208	825.616	784.453	749.973	785.469	684.302	707.431
CDK13	uc003thh.4	0.0681812	0.00117956	24	18	53.4976	0.180872	0.0343842	24	20	26.2744	FALSE	618.452	593.426	571.926	559.345	582.518	644.731	574.3	619.136	582.964	565.067	610.515	657.819	602.642	675.307	680.288	618.084	676.297	672.856	723.993	708.029	650.974	622.56	622.003	684.612	631.721	508.327	577.907	624.317	636.148	603.179	560.863	555.414	700.947	536.282	583.907	601.607	589.942
LPHN2	uc001diu.3	0.0681812	0.00117956	24	18.5	52.4905	0.0405356	0.00303752	24	21	33.5423	FALSE	275.359	307.929	196.997	274.85	164.863	225.656	224.793	286.981	232.04	285.019	237.024	262.813	258.695	339.066	278.218	271.063	316.926	374.19	278.074	377.946	369.952	363.98	290.822	357.018	652.194	515.84	501.58	540.939	509.928	538.447	382.706	472.853	478.263	503.406	477.931	541.653	484.953
RRM2	uc021vdr.1	0.0751878	0.00150497	24	5	899.679	0.00368554	3.0027e-05	24	7	661.776	FALSE	8783.5	7690.06	8845.78	7789.84	8552.75	8046.74	7613.71	7889.33	7528.4	7528.15	7324.39	7127.42	7588.88	6597.67	7201.35	6265.74	7269.49	6616.99	6929.29	6245.18	5935.25	6485.58	6313.81	6181.12	3626.55	3322.91	4335.39	3998.07	4445.46	4045.71	4141.59	4125.58	4122.17	4045.74	3328.89	3529.02	3804.63
LAMB2	uc003cwe.3	0.0751878	0.00150497	24	17	337.061	0.0519784	0.00474194	24	17	282.675	FALSE	650.848	919.708	713.848	990.908	800.504	927.421	954.6	953.947	1280.52	1004.19	1149.2	1084.3	1112.68	1333.66	1432.37	1231.7	1242.24	1405.79	1628.36	1501.88	1760.83	1430.62	1558.57	1687.01	938.808	1111.81	981.352	1043.24	941.6	1026.88	1013.95	1108.33	1027.38	1230.78	1417.17	1244.56	1384.86
AP2S1	uc002pft.1	0.0751878	0.00150497	24	6	315.056	0.0275044	0.00150497	24	3.5	210.691	FALSE	2808.07	2965.09	2658.4	3105.33	3123.25	2911.21	2640.55	2819.33	3000.76	2717.62	2953.82	2686.36	2714.83	2822.73	2423.19	2517.02	2436.37	2547.24	2327.3	2452.52	2383.35	2446.67	2546.18	2426.55	3711.36	3763.63	3674.62	3882.15	3612.41	3995.69	3373.98	3677.74	3484.49	3297.83	3328.89	3609.64	3334.67
COL5A2	uc002uqk.3	0.0751878	0.00150497	24	18	224.011	0.162076	0.0286919	24	13	143.302	FALSE	477.092	611.779	713.848	740.168	595.34	612.495	739.045	678.924	880.892	715.862	897.816	727.063	998.033	833.538	945.941	965.105	1015.86	878.833	1137.35	1046.36	1076.06	1011.84	1099.19	1098.52	1035.32	1066.74	1138.37	1087.98	1065.3	1071.01	1229.5	1243.43	1136.19	1337.62	1456.65	1465.77	1562.35
KIFC1	uc003oef.4	0.0751878	0.00150497	24	4.5	117.024	0.0033118	2.16523e-05	24	7	265.505	FALSE	2117.46	2029.07	2236.86	2010.75	2584.69	2050.74	2067.79	2228.09	1955.15	2296.72	2106.28	2222.11	1904.94	1958.11	1836.24	1879.57	2014.74	1819.46	2024.18	1922.74	1933.36	1919.68	2051.19	1967.52	1292.69	1242.02	1332.46	1427.59	1451.53	1379.96	1522.03	1583.68	1290.55	1448.58	1130.41	1149.46	1287.37
CCNI	uc003hkm.3	0.0751878	0.00150497	24	16	112.228	0.180872	0.0343842	24	16	47.0171	FALSE	1200.09	989.043	1222.23	1169.32	1086.27	1031.57	1314.88	1044.29	1206.03	1246.13	1282.08	1156.69	1484.56	1234.77	1400.06	1228.72	1375.23	1393.77	1362.81	1335.19	1446.02	1328.03	1346.09	1200.52	769.179	771.255	837.42	711.762	820.429	815.027	778.61	763.069	842.654	776.684	903.912	895.175	962.406
IQGAP3	uc001fpf.3	0.0751878	0.00150497	24	7.5	82.7856	0.00587204	7.67819e-05	24	9	116.295	FALSE	1116.16	1272.5	1249.76	1186.2	1269.45	1237.39	1439.6	1242.26	1283.38	1244.47	1323.38	1174	1219.98	1147.17	1062.61	1184.04	1035.67	1177.5	1162.4	1123.93	1120.53	1097.56	1176.35	1157.37	912.486	738.702	809.07	748.367	893.637	847.393	1104.13	945.706	845.185	916.405	874.821	758.728	794.922
EIF4G3	uc001bef.3	0.0751878	0.00150497	24	17	81.8987	0.0355671	0.00241479	24	17.5	54.1996	FALSE	351.929	379.303	413.057	438.796	340.718	364.521	435.729	383.97	376.707	372.845	456.091	407.596	471.824	392.752	500.792	418.51	534.812	496.06	468.466	495.125	526.471	459.542	502.113	496.295	409.449	418.181	444.88	488.065	403.904	473.716	448.69	447.834	490.916	532.173	500.788	531.316	512.45
CDK2	uc001sit.4	0.0751878	0.00150497	24	6	51.8589	0.0519784	0.00474194	24	6	85.6759	FALSE	767.175	736.174	826.115	836.606	807.831	763.758	780.616	690.881	782.06	725.804	897.816	698.736	704.062	692.261	743.111	691.063	679.127	665.99	626.292	663.468	643.859	688.61	687.29	637.533	549.831	548.393	567.003	618.216	520.026	553.159	547.666	550.411	561.769	532.173	355.331	467.228	484.953
HIATL1	uc004aur.3	0.0751878	0.00150497	24	4.5	22.7572	0.031144	0.00191087	24	5	57.6655	FALSE	379.906	428.245	362.22	431.563	403	409.156	366.443	373.342	328.007	344.674	353.74	431.202	333.658	356.02	292.577	351.489	299.948	317.547	348.218	316.88	339.716	334.468	340.677	341.325	394.826	415.677	370.733	396.553	421.574	435.466	424.496	377.782	339.086	449.984	332.474	374.196	404.961
PSMD11	uc010cta.2	0.0855758	0.00191087	24	5	549.602	0.0118068	0.000323018	24	4	263.78	FALSE	3936.01	3770.6	3450.62	3951.58	3496.94	3632.81	3361.12	3547.41	3075.24	3445.08	2982.55	3350.47	3014.68	3003.56	2516.53	2928.08	2682.55	3086.21	2457.57	2856.87	2555.87	2774.12	2417.98	2667.83	3509.56	3395.53	3528.51	3636.09	3407.94	3733.82	3248.61	3227.41	3231.44	3219.75	2844.73	3183.76	2854.72
PSMB5	uc001wii.3	0.0855758	0.00191087	24	6.5	260.346	0.0592317	0.00588624	24	5	150.926	FALSE	2593.08	2801.95	2539.77	2608.67	2782.53	2730.19	2685.2	2743.6	2443.58	2621.51	2596.48	2636	2210.67	2444.1	2105.48	2368.08	2385.43	2375.59	2242.12	2295.73	2045.41	2231.66	2012.01	2199	2962.66	3087.53	3096.71	3211.06	3137.83	3104.16	2894.49	3009.75	3206.13	3094.41	3013.04	2997.7	2909.72
CCNA2	uc003iec.4	0.0855758	0.00191087	24	6	219.131	0.00169817	3.75778e-06	24	6	159.315	FALSE	2831.63	1839.42	2779.13	2198.8	2762.38	2028.42	2355.71	2200.19	1972.34	2077.99	1901.58	2143.42	2116.6	1935.5	1983.42	1775.32	1960.98	1824.61	1821.26	1615.76	1863.99	1658.29	2041.69	1714.47	976.828	913.988	1024.97	937.492	1168.8	1059.24	1143.72	1063.29	1024.85	988.321	862.353	982.005	967.406
CXCL14	uc003lay.3	0.0855758	0.00191087	24	17	148.71	0.127494	0.0197614	24	14	15.8773	FALSE	78.0428	40.7853	80.4932	65.0962	82.4317	64.4731	177.063	51.8161	183.34	66.2835	206.498	99.145	296.911	135.627	355.401	248.723	333.904	188.812	508.549	211.253	885.751	185.503	494.991	249.128	20.4724	22.5367	13.0847	16.2688	37.866	11.7693	15.3962	22.5168	25.3049	30.8208	41.5592	66.1561	59.9942
TSTA3	uc003yzb.2	0.0855758	0.00191087	24	5	125.408	0.14296	0.0238555	24	3	92.879	FALSE	1375.32	1578.39	1264.59	1446.58	1513.08	1591.99	1319.5	1469.45	1418.02	1380.35	1398.8	1432.09	1192.05	1412.78	1164.93	1265.96	1208.28	1254.74	1172.42	1290.63	1131.2	1280.25	1202.46	1359.42	1991.68	2173.54	1851.48	2082.41	2034.66	2039.04	1904.73	1993.99	1999.09	1898.56	1672.76	1858.57	1729.83
SEC31A	uc003hnm.3	0.0855758	0.00191087	24	17	107.274	0.0355671	0.00241479	24	18	227.348	FALSE	2245.57	2251.35	2404.21	2379.63	2119.41	2363.19	2257.17	2341.02	2310.37	2202.27	2321.75	2283.48	2609	2432.8	2681.66	2321.91	2611.81	2488.88	2457.57	2409.61	2635.91	2448.08	2442.91	2410.85	2453.77	2251.16	2278.92	2468.8	2335.07	2347.98	2153.27	2269.19	2467.23	2459.5	2553.81	2741.34	2657.24
HR	uc003xas.3	0.0855758	0.00191087	24	17	81.0566	0.0776988	0.00895623	24	18	52.5965	FALSE	53.0102	114.199	97.4392	149.48	76.9363	116.548	92.3807	156.777	174.746	193.879	208.293	207.732	105.83	262.777	235.139	239.787	164.122	257.471	280.579	376.295	222.327	302.145	258.772	268.745	90.6637	147.74	139.57	103.714	128.744	164.771	147.364	157.618	169.543	141.776	247.277	198.468	179.982
MXD4	uc003geu.1	0.0855758	0.00191087	24	18.5	45.4615	0.0405356	0.00303752	24	18	45.9127	FALSE	86.8778	136.631	114.385	137.425	126.395	123.987	138.571	104.961	150.396	130.91	163.403	113.309	151.395	146.929	192.06	201.064	132.996	200.827	240.496	259.116	216.991	240.311	202.982	256.975	216.423	232.879	172.282	227.764	209.525	235.387	189.154	217.662	199.909	205.472	305.46	274.961	229.978
CCT5	uc003jeq.3	0.0937805	0.00241479	24	5	938.212	0.0884636	0.0109801	24	3.5	629.054	FALSE	9683.2	9252.14	9313.91	9653.52	9358.75	9189.9	8495.94	9407.94	8814.65	9337.69	8685.48	9209.47	8478.14	8640.54	7639.32	8273.39	7733.56	8561.75	7578.13	8598.67	7541.34	8323.75	7643.28	7905.41	10353.2	9645.7	9841.87	9936.2	10185.9	9836.23	9215.75	9517.1	10023.3	8944.2	8573.66	8972.42	8456.68
PSMA5	uc001dxn.3	0.0937805	0.00241479	24	5.5	650.166	0.0239819	0.00117956	24	3	248.692	FALSE	4139.21	4202.92	4194.12	4284.29	4017.17	3920.46	3625.94	3895.51	3440.49	3567.71	3582.29	3484.24	3333.64	3359.58	2976.03	3303.4	3135.3	3249.28	2728.13	3054.92	2876.02	2879.52	2689.81	2771.8	4328.46	4096.67	4483.69	4378.35	4193.02	4610.64	3721.49	3822.85	4471.38	3727.26	3792.28	4147.16	3454.66
TAGLN	uc001pqp.3	0.0937805	0.00241479	24	5	592.595	0.0118068	0.000323018	24	1.5	597.683	FALSE	2512.09	2857.01	1986.91	3209	2251.3	2692.99	1582.79	2080.62	1551.23	1917.25	1643	1789.33	1158.25	1799.88	1053.64	1337.45	1148.86	1175.78	929.417	1315.38	915.988	1245.12	923.508	1141.67	5349.16	5165.91	4959.1	5824.25	4526.25	4675.37	4183.38	4095.56	4160.13	4214.23	3684.22	3690.27	3269.68
TENM2	uc003lzr.5	0.0937805	0.00241479	24	18.5	400.342	0.127494	0.0197614	24	19	225.265	FALSE	2073.29	2434.88	2211.45	2331.41	2229.32	2720.27	2181.72	2650.59	2446.44	2616.54	2442.06	2859.47	2447.31	2859.46	2911.42	2890.85	2693.87	3041.58	3349.41	3399.86	3181.95	3288.47	3070.84	3440.72	3193.7	3019.92	3286.44	3627.95	3213.56	3342.49	3134.23	3242.42	2403.97	3583.43	3387.07	3220.98	3344.67
C1orf198	uc001hub.3	0.0937805	0.00241479	24	18	290.716	0.162076	0.0286919	24	18	41.4364	FALSE	555.135	628.093	648.182	699.181	672.277	627.373	709.791	670.952	767.737	775.517	854.721	799.455	946.588	1034.15	1138	927.871	928.14	961.223	1184.94	1076.07	1234.36	1160.8	1188.22	1326.07	263.217	345.562	329.298	292.839	285.257	291.291	332.119	252.689	331.495	260.949	386.501	312.174	337.467
PRR11	uc002ixf.2	0.0937805	0.00241479	24	7	287.584	0.067985	0.00727581	24	9	100.389	FALSE	2712.36	1963.81	2984.6	2138.53	2584.69	2149.93	2649.78	2370.25	2211.54	2333.18	2375.62	2440.85	2437.02	2088.08	1863.16	2022.55	1994.94	2076.93	1926.47	1833.61	2121.89	1852.22	1945.54	1720.36	1512.04	1387.26	1744.63	1600.45	1724.16	1650.65	1856.35	1826.36	1682.78	1575.97	1521.07	1643.57	1897.31
SLC25A5	uc004erh.4	0.0937805	0.00241479	24	6	240.545	0.14296	0.0238555	24	3	130.346	FALSE	3086.37	3230.19	2891.4	3397.06	3172.71	2985.6	3221.01	3138.19	3039.43	2986.07	2993.32	3065.63	3027.91	3012.04	2749.87	2537.87	2832.52	2864.79	2595.35	2681.93	2723.06	2798.01	2759.84	2703.14	3240.5	3480.67	3260.27	3383.92	3301.91	3439.59	3209.02	3470.09	3211.2	3180.71	2921.61	3032.84	3102.2
PARP1	uc001hqd.4	0.0937805	0.00241479	24	4.5	151.513	0.00995245	0.000245257	24	2	105.971	FALSE	3539.9	3187.37	3120.17	3331.96	3209.34	2834.34	2951.56	2903.03	2969.25	2936.36	2935.86	2923.99	2795.67	2876.41	2724.74	2701.7	2642.94	2792.7	2645.46	2865.12	2767.53	2656.07	2653.01	2722.76	2477.17	2356.34	2396.68	2535.91	2587.51	2336.21	2331.43	2221.66	2317.93	2249.92	2206.79	2207.96	2089.8
TUFM	uc002drh.2	0.0937805	0.00241479	24	7	123.237	0.0275044	0.00150497	24	4	174.885	FALSE	2083.6	2210.56	2105.53	2502.59	2707.42	2231.76	2297.2	2350.32	2512.33	2242.04	2346.89	2165.45	1965.2	2226.54	2013.94	2037.44	2079.83	2142.15	2086.8	2155.45	1830.2	2018.05	1939.6	2144.07	2997.75	3580.83	3090.17	3361.55	3223.66	3469.01	3022.06	3129.84	3006.23	3119.07	2871.74	2749.61	2719.73
ANKRD52	uc001skm.4	0.0937805	0.00241479	24	6	103.419	0.00884927	0.000185139	24	4	144.423	FALSE	920.316	1097.12	779.513	1277.81	1139.39	996.853	965.378	1008.42	955.374	1002.54	992.985	944.238	902.493	1059.58	874.143	838.51	831.93	803.308	814.179	901.128	844.843	803.847	838.042	857.236	1693.36	1727.81	1635.59	1738.73	1547.46	1653.59	1464.84	1578.68	1606.86	1487.62	1469.12	1494.71	1384.86
CPE	uc003irg.4	0.0937805	0.00241479	24	19	102.678	0.127494	0.0197614	24	17	229.331	FALSE	553.662	522.051	590.99	643.729	573.359	552.981	617.411	551.376	698.984	548.496	691.319	637.361	712.881	610.32	732.341	683.616	755.529	686.588	849.252	790.55	931.995	815.09	895.02	902.354	701.912	681.109	737.104	719.896	701.783	723.815	807.203	708.028	754.087	752.028	980.797	930.32	984.904
LRR1	uc001wwn.3	0.0937805	0.00241479	24	6	102.175	0.031144	0.00191087	24	5.5	132.969	FALSE	1151.5	933.982	1010.4	793.209	980.022	853.029	888.394	894.16	882.324	851.743	883.451	841.945	870.156	726.167	789.78	708.935	789.485	863.384	651.343	673.37	738.126	694.232	759.698	747.385	552.756	473.27	586.63	536.872	621.002	597.294	455.289	512.883	501.038	523.954	324.162	419.678	372.464
SMPD4	uc002tqq.2	0.0937805	0.00241479	24	5	97.6359	0.0462294	0.00380362	24	4	48.2847	FALSE	845.218	776.959	758.331	846.25	967.199	758.799	791.394	753.326	822.166	720.833	743.392	717.621	662.906	788.33	687.467	646.382	614.044	741.515	661.364	605.703	656.31	646.45	645.744	606.146	459.168	510.831	438.337	451.46	451.867	582.582	435.494	450.336	425.123	431.491	380.267	357.657	389.962
NDUFS3	uc001nga.2	0.0937805	0.00241479	24	7	97.4757	0.180872	0.0343842	24	6.5	49.8891	FALSE	1476.92	1560.04	1338.73	1444.17	1547.89	1480.4	1456.53	1566.44	1419.45	1552.69	1423.94	1490.32	1315.52	1483.42	1152.36	1324.04	1163	1349.15	1174.92	1318.68	1131.2	1323.82	1122.93	1333.91	1728.46	1802.93	1644.31	1655.36	1656.01	1983.13	1711.18	1701.27	1687.84	1709.53	1533.53	1744.87	1647.34
GNPDA1	uc003lmf.4	0.0937805	0.00241479	24	8	43.4143	0.0519784	0.00474194	24	4	29.9895	TRUE	295.974	352.792	370.693	523.18	346.213	322.366	377.221	414.529	421.109	357.931	395.039	404.449	301.321	358.845	324.887	318.723	308.437	355.309	288.094	344.937	289.915	311.983	303.879	315.824	763.33	873.922	697.85	683.292	785.088	726.757	688.432	735.549	741.434	696.55	679.493	688.437	642.437
CDH11	uc002eoi.3	0.0937805	0.00241479	24	18	36.2377	0.127494	0.0197614	24	22	32.1784	FALSE	189.953	167.22	146.159	101.261	130.059	158.703	118.555	158.105	133.208	140.852	120.307	196.716	196.961	178.01	143.596	189.149	144.314	205.976	197.908	224.457	197.427	202.367	176.867	221.665	286.614	270.44	298.767	292.839	204.476	276.58	239.741	197.647	194.848	265.059	232.731	270.827	312.47
PLS1	uc003eva.3	0.0937805	0.00241479	24	3.5	29.836	0.0033118	2.16523e-05	24	6	70.465	FALSE	415.247	326.282	381.284	337.536	318.736	305.007	372.602	290.967	292.198	286.676	305.258	262.813	332.188	209.091	274.628	254.681	271.651	257.471	250.517	280.571	277.464	258.58	263.52	278.553	324.635	313.009	390.36	370.116	366.038	358.965	409.1	397.797	321.373	322.591	328.318	334.915	239.977
EPAS1	uc002ruv.3	0.0937805	0.00241479	24	17.5	28.0071	0.14296	0.0238555	24	19	28.131	FALSE	97.1854	114.199	97.4392	130.192	141.05	116.548	149.349	112.932	130.343	150.795	152.629	165.242	135.227	138.452	148.981	159.362	215.057	157.915	182.877	198.05	181.419	206.583	172.119	156.931	155.006	175.285	111.22	77.277	98.4515	155.944	118.771	92.5691	144.238	113.01	155.847	198.468	127.488
GNB2L1	uc003mni.1	0.102024	0.00303752	24	5	1575.41	0.0884636	0.0109801	24	0	841.82	TRUE	15215.4	15902.2	12328.2	15637.5	14934.8	14461.8	12907.1	14212.2	13064.4	13096	13029.1	13269.7	12696.6	12847.8	10764.3	11605.1	12068.7	12137.2	10268.7	11711.4	10870.9	12150.5	10653.6	11181.3	15725.8	17220.5	15679.8	18337	15714.4	16668.3	15086.1	15571.6	16622.8	14950.1	13895.3	14395.2	13826.2
GSN	uc004blf.1	0.102024	0.00303752	24	17	401.677	0.0275044	0.00150497	24	19	363.443	FALSE	834.911	1117.52	1029.47	1039.13	970.863	1150.6	1137.82	1151.91	1346.4	1171.56	1256.94	1411.64	1234.68	1830.96	1464.68	1714.25	1522.38	1685.57	1615.83	1970.6	2113	1911.24	1814.97	2073.45	2620.47	3014.91	2787.04	2855.18	2408.28	2771.68	2960.48	2669.49	2601.35	2967.02	3160.58	2662.78	3362.17
RPL3	uc003axi.3	0.102024	0.00303752	24	5	294.6	0.162076	0.0286919	24	19	186.227	TRUE	2974.46	3662.52	2721.94	3599.58	3383.37	3206.3	3125.55	3182.04	3227.07	3203.15	3411.7	3090.81	2994.1	3130.71	2622.43	2948.93	2716.51	2639.93	2753.18	2846.97	2948.95	2864.06	2673.19	2824.76	2284.14	2421.44	2453.38	2716.9	2433.52	2268.54	2516.18	2394.29	3066.96	2171.84	2591.22	2141.8	2642.24
PSMB7	uc004boj.4	0.102024	0.00303752	24	6	268.632	0.14296	0.0238555	24	4	191.436	FALSE	2666.71	2481.78	2334.3	2439.9	2635.98	2318.55	2428.07	2398.15	2267.4	2344.78	2375.62	2376.33	2188.62	2147.42	1807.52	1967.44	2051.53	2051.18	1788.69	2048.17	1823.08	1963.24	1844.64	1877.29	3059.17	3090.03	2961.5	3032.11	2807.13	2995.3	2529.38	2777.07	2856.93	2747.16	2578.75	2633.84	2417.26
COTL1	uc002fid.3	0.102024	0.00303752	24	4	228.272	0.0519784	0.00474194	24	2	194.477	FALSE	2411.96	2498.1	2147.9	2538.75	2478.45	2303.67	2010.82	2317.11	2192.92	2268.55	2143.99	2253.58	1891.71	2237.84	1841.62	1980.85	1955.32	1927.6	1866.35	2049.82	1645.22	2147.34	1774.61	2171.53	3059.17	3100.05	2913.52	3123.62	2885.39	3010.01	2821.91	2977.22	2672.2	2662.92	2707.58	2584.22	2337.27
MAT2A	uc002spr.3	0.102024	0.00303752	24	5	201.44	0.162076	0.0286919	24	17	115.668	TRUE	1640.37	1971.97	1639.52	2114.42	1753.05	2080.5	1576.63	2069.99	1502.53	1902.34	1537.06	1860.15	1447.81	1593.61	1292.37	1458.08	1451.63	1479.6	1295.17	1485.38	1293.05	1437.65	1354.4	1355.49	1506.19	1452.36	1533.09	1801.77	1638.33	1683.02	1629.8	1536.15	1938.36	1851.3	1691.46	1964.01	1719.83
PPME1	uc009yty.4	0.102024	0.00303752	24	4.5	142.509	0.00793786	0.000138924	24	5	125.493	FALSE	1362.07	1180.73	1245.53	1514.09	1291.43	1262.19	985.394	1191.77	919.565	1110.25	1034.28	1076.43	959.817	884.398	843.628	915.956	880.035	969.806	879.314	871.42	771.92	881.14	788.187	804.272	1629.02	1419.81	1424.05	1421.49	1481.82	1477.05	1449.45	1336	1323.45	1516.38	1485.74	1399.62	1349.87
UHRF1	uc002mbp.3	0.102024	0.00303752	24	5	115.204	0.162076	0.0286919	24	6	127.439	FALSE	1133.83	1252.11	915.081	1321.21	1166.87	1118.36	1019.27	1133.31	1153.04	1004.19	1080.97	1043.38	980.395	1031.33	854.398	927.871	979.075	902.863	914.386	914.331	816.385	982.324	909.264	945.51	696.063	813.825	730.562	758.535	709.356	638.487	732.421	733.047	599.727	636.963	625.466	498.238	637.438
NEK2	uc001hir.2	0.102024	0.00303752	24	6.5	113.661	0.0033118	2.16523e-05	24	10	128.716	FALSE	921.789	573.033	1256.12	699.181	996.508	751.36	1057.76	855.63	764.872	785.459	854.721	818.339	751.097	647.052	739.521	670.212	636.681	602.481	688.921	572.695	716.783	577.589	781.065	541.412	380.203	368.099	558.28	390.452	585.66	547.274	615.849	545.407	473.202	585.595	540.27	624.348	579.943
PAPSS2	uc001kew.3	0.102024	0.00303752	24	4.5	106.789	0.00793786	0.000138924	24	2	70.0553	FALSE	746.56	766.763	597.345	619.619	674.109	644.731	568.141	637.736	489.862	521.982	461.478	560.248	524.739	454.914	398.48	469.148	427.284	472.029	423.373	536.386	419.754	401.924	404.777	476.678	959.28	999.126	872.313	906.988	848.198	873.874	785.208	783.084	718.66	805.45	758.455	857.962	679.934
UACA	uc002asr.3	0.102024	0.00303752	24	18	102.559	0.0239819	0.00117956	24	6	87.9799	TRUE	796.626	485.345	1040.06	641.318	602.668	607.535	715.95	593.892	710.443	606.494	725.436	706.605	890.734	745.946	911.837	787.871	829.101	731.216	881.819	840.062	942.667	826.332	764.447	808.195	503.037	495.807	577.907	473.83	507.404	444.293	556.464	530.396	465.611	419.163	423.904	454.823	467.454
EBP	uc004djx.4	0.102024	0.00303752	24	7	80.4005	0.127494	0.0197614	24	5	85.4782	FALSE	855.526	1056.34	885.426	995.73	1139.39	1120.84	1040.82	1033.66	1094.31	985.967	1005.55	1019.78	926.01	974.816	759.265	953.19	874.376	1005.85	799.148	849.965	789.706	987.945	813.115	869.006	713.611	833.857	601.896	756.501	633.624	779.719	631.246	695.519	528.873	571.212	538.192	603.675	569.944
ZNF462	uc004bcz.3	0.102024	0.00303752	24	16	40.6081	0.0884636	0.0109801	24	19	24.4945	FALSE	524.212	481.266	518.97	465.317	439.636	508.346	551.205	467.673	534.264	591.58	576.398	533.494	674.665	593.366	628.234	519.787	659.319	568.152	623.787	475.32	617.18	556.51	599.45	537.489	505.962	500.815	488.495	498.233	522.55	514.909	404.701	497.872	493.446	528.063	450.917	473.43	512.45
CCDC147	uc001kyh.3	0.102024	0.00303752	24	5	32.0502	0.162076	0.0286919	24	14	34.7936	TRUE	139.888	91.7668	141.922	173.59	122.732	141.345	115.476	85.0315	81.6436	114.339	71.8253	102.292	98.4805	33.9066	70.0032	75.9574	93.3799	65.2259	47.5982	42.9109	46.244	70.2664	60.5385	60.8108	222.272	187.806	292.225	268.436	300.403	303.061	395.903	365.273	415.001	402.725	299.226	409.341	349.966
KLHDC8B	uc003cwh.3	0.102024	0.00303752	24	16	24.928	0.031144	0.00191087	24	20	24.6365	TRUE	89.8229	134.591	135.568	89.2059	119.068	101.669	169.365	118.247	166.152	139.195	179.563	122.751	139.636	144.103	183.085	159.362	186.76	159.632	185.382	174.944	179.64	123.669	170.932	127.507	131.609	147.74	128.666	119.983	123.695	117.693	114.372	120.09	111.342	100.681	137.145	99.2342	149.985
DUS1L	uc002kdq.4	0.102024	0.00303752	24	4.5	19.7696	0.0206922	0.000919932	24	3	38.7512	FALSE	248.853	242.672	213.943	267.618	272.941	215.737	250.967	229.851	239.202	235.306	238.819	234.486	191.081	231.695	175.905	212.978	186.76	207.693	167.846	222.806	170.747	219.231	197.047	235.397	359.73	338.05	303.129	351.814	292.83	270.695	250.739	312.733	346.678	332.865	303.382	229.479	259.975
REXO2	uc001poy.3	0.115999	0.00380362	24	5	300.795	0.0519784	0.00474194	24	5.5	170.445	FALSE	2889.06	2165.7	2840.56	2738.86	2434.48	2415.26	2126.29	2350.32	2025.33	2298.38	2016.5	2281.91	2051.92	1938.33	1838.03	2098.51	1813.83	1975.66	1866.35	1926.04	1693.24	1916.87	1673.71	1728.2	3386.73	2812.08	3070.54	3190.73	3200.94	2830.53	3094.64	2839.62	2932.84	2897.16	2861.35	2846.78	2784.73
EFTUD2	uc031rav.1	0.115999	0.00380362	24	6	283.35	0.00995245	0.000245257	24	1.5	168.667	FALSE	3042.2	2740.77	2713.47	2640.01	2938.23	2819.46	2440.39	2839.26	2419.23	2730.88	2508.5	2642.29	2488.47	2836.86	2390.88	2280.21	2309.03	2559.26	2292.23	2275.93	2168.13	2255.55	2304.02	2324.54	3483.24	3633.41	3242.82	3404.26	3372.6	3545.51	3165.03	3132.34	3259.28	3125.23	2846.8	3161.02	2839.72
CSNK2B	uc003nvr.1	0.115999	0.00380362	24	5	131.907	0.0405356	0.00303752	24	3	129.918	FALSE	915.899	1060.42	828.233	1164.5	1161.37	1053.89	979.235	1112.05	1121.53	1010.82	1023.51	908.042	767.266	1076.54	807.729	917.446	735.721	897.714	816.685	892.876	866.187	820.711	895.02	886.661	1520.81	1625.15	1415.33	1494.7	1597.94	1753.63	1506.63	1461.09	1576.5	1352.01	1284.18	1459.57	1307.37
CDC45	uc011aha.2	0.115999	0.00380362	24	4	126.326	0.0239819	0.00117956	24	5	259.445	FALSE	1591.78	1468.27	1457.35	1559.9	1622.99	1435.77	1314.88	1369.8	1379.35	1227.9	1278.49	1136.23	1222.92	1085.01	1238.52	1233.19	1208.28	1117.42	1159.89	1148.69	1042.27	1172.04	1166.85	1155.41	968.054	941.532	1096.93	1090.01	946.649	968.028	888.583	818.11	708.538	830.107	600.53	667.763	574.944
WDR46	uc003ods.3	0.115999	0.00380362	24	5	125.131	0.0884636	0.0109801	24	0	61.7803	TRUE	1198.62	1160.34	1057	1159.68	1201.67	1224.99	1053.14	1151.91	1075.69	1145.05	1077.38	1137.81	987.744	1150	919.016	1058.93	959.267	928.61	866.788	1109.08	901.759	964.054	924.695	996.513	1702.14	1677.73	1504.74	1547.57	1572.7	1556.5	1436.25	1543.65	1624.58	1469.13	1402.62	1376.87	1289.87
PA2G4	uc001sjm.3	0.115999	0.00380362	24	6	109.575	0.067985	0.00727581	24	6	102.639	FALSE	982.161	944.179	1114.2	904.113	1038.64	1061.33	897.632	995.135	909.539	980.996	896.021	975.712	956.877	842.015	795.165	923.403	860.227	846.22	809.169	815.306	773.699	890.977	751.389	808.195	1070.42	1041.7	1009.7	933.425	1037.53	1059.24	976.561	1040.78	1083.05	1017.09	854.041	913.781	907.412
PSMD2	uc003fnn.1	0.128459	0.00474194	24	5.5	982.597	0.0206922	0.000919932	24	4	564.876	FALSE	6800.03	6674.51	6064.53	6574.71	6631.18	5946.4	5453.54	6062.48	5576.12	5417.02	5523.37	5522.22	5060.72	4854.3	4465.85	4949.14	4748.23	5085.9	4121	4556.8	4081.93	4720.49	4194.96	4503.92	12377.1	12600.5	11754.4	12797.5	11723.3	12578.5	10759.8	11443.5	11528.9	11099.6	9805.89	11120.4	9476.58
EIF3I	uc001bur.4	0.128459	0.00474194	24	7	360.369	0.0355671	0.00241479	24	3	165.586	FALSE	5019.77	4600.58	4732.16	4636.29	5541.25	4589.99	5040.9	4538.56	5116.33	4477.45	5189.38	4455.23	4596.24	4119.66	4403.02	4149.36	4589.77	4222.52	3930.61	4144.2	4108.61	4208.95	4120.18	4001.74	5597.75	6019.8	5711.47	6021.51	5712.71	6278.94	5454.67	5646.71	5888.46	5572.4	5292.56	5718.37	5304.48
PTTG1	uc003lyk.3	0.128459	0.00474194	24	7.5	232.196	0.0154744	0.00055099	24	11	135.361	FALSE	2242.63	1904.67	2537.66	1931.19	2505.93	2268.96	2588.2	2192.22	2644.11	2089.59	2707.81	2008.08	2401.75	1989.19	1789.57	1952.55	2252.44	2030.58	1863.84	1610.81	1986.72	1738.39	1972.84	1630.12	1155.23	1114.31	1421.87	1275.07	1666.1	1535.9	1526.43	1518.63	1599.27	1479.4	1494.05	1585.68	1604.84
COL16A1	uc001btk.1	0.128459	0.00474194	24	16	230.674	0.0405356	0.00303752	24	17.5	122.373	FALSE	528.63	575.072	516.851	503.893	672.277	590.177	646.665	620.464	804.978	661.178	791.874	705.031	814.301	1101.97	1039.28	837.02	913.992	801.592	1182.44	947.34	1115.19	997.782	1033.9	1045.55	497.188	578.442	479.772	488.065	449.343	488.428	525.671	425.317	480.794	558.884	600.53	576.799	717.43
UBE2C	uc002xpm.3	0.128459	0.00474194	24	4.5	219.564	0.00220367	7.75784e-06	24	7	266.157	FALSE	2145.44	1590.63	2016.57	1788.94	2291.6	1720.94	1929.22	1777.69	1641.47	1623.95	1824.36	1507.63	1452.22	1607.74	1563.4	1429.79	1406.36	1448.7	1733.58	1358.29	1627.43	1306.95	1757.99	1284.87	1052.87	964.069	1234.32	1144.92	1252.1	1359.36	1383.46	1353.51	1348.75	1109.55	1026.51	1050.23	1104.89
EIF3K	uc002oiz.1	0.128459	0.00474194	24	5	172.269	0.180872	0.0343842	24	4.5	52.8449	FALSE	2707.94	2363.51	2613.91	2654.48	2868.62	2435.1	2660.56	2426.06	2592.54	2349.75	2553.39	2338.56	2620.76	2314.13	2405.24	2018.08	2444.86	2255.44	2309.76	2264.37	2207.26	2249.93	2319.45	2465.78	2889.54	3408.05	2915.71	3211.06	2996.46	3165.95	2993.47	2944.7	3036.59	2890.99	3033.82	2935.68	2749.73
CDC25B	uc002wjn.3	0.128459	0.00474194	24	6	136.279	0.00451691	4.13437e-05	24	10	120.949	TRUE	1107.32	1131.79	1554.79	1335.68	1615.66	1187.79	1699.8	1258.2	1405.13	1302.47	1429.32	1260.56	1109.74	1240.42	1132.62	991.914	1114.9	1064.21	1292.67	922.583	1211.24	1052.59	1165.66	1029.86	508.887	480.783	540.834	514.502	595.758	632.602	699.429	718.036	559.239	719.152	594.296	634.685	679.934
FANCD2	uc003buw.3	0.128459	0.00474194	24	5	131.53	0.0275044	0.00150497	24	8	59.7335	FALSE	911.481	870.765	991.338	1029.48	963.536	974.536	954.6	890.174	918.133	899.798	770.326	859.256	921.601	734.644	798.754	749.148	837.59	806.741	726.499	731.135	691.882	761.687	701.534	664.996	754.556	666.084	780.72	734.132	732.075	841.508	835.796	750.56	749.026	840.381	710.662	793.873	642.437
LAMC2	uc001gqa.2	0.128459	0.00474194	24	5	124.689	0.00587204	7.67819e-05	24	3	184.629	FALSE	1007.19	764.724	654.537	843.839	771.195	681.927	695.934	677.595	644.555	551.81	693.114	627.918	623.22	519.902	551.051	540.638	673.467	496.06	526.085	463.767	474.891	475.001	534.163	470.793	2974.35	2438.97	2710.71	2875.52	2703.63	2445.08	2362.22	2406.8	2444.46	2564.29	2208.87	2340.27	2117.29
CRTAP	uc003cfl.4	0.128459	0.00474194	24	6	106.219	0.0884636	0.0109801	24	2	106.668	FALSE	1481.34	1588.59	1444.64	1719.02	1639.48	1458.08	1495.03	1396.38	1453.83	1401.9	1569.38	1377.01	1400.77	1347.79	1317.5	1356.81	1426.17	1313.1	1342.77	1239.46	1239.7	1329.44	1240.45	1267.22	1994.6	2130.97	1895.1	2171.89	1782.22	2080.23	1878.34	1793.84	1816.89	1888.29	1743.41	1889.58	1729.83
PSMD4	uc001exl.3	0.128459	0.00474194	24	6	101.746	0.0519784	0.00474194	24	2	47.0666	FALSE	1437.17	1496.82	1414.99	1559.9	1503.92	1378.73	1387.25	1506.65	1489.64	1401.9	1443.69	1433.67	1422.82	1344.96	1179.28	1316.59	1225.26	1321.68	1272.62	1313.73	1202.35	1308.36	1265.37	1237.79	1500.34	1507.45	1426.23	1494.7	1474.25	1409.38	1471.44	1423.56	1422.14	1485.56	1338.21	1273.51	1427.36
THOP1	uc002lwj.3	0.128459	0.00474194	24	5	68.392	0.0405356	0.00303752	24	3.5	50.9899	FALSE	640.54	615.857	472.368	617.208	697.922	676.968	626.649	644.38	635.961	611.465	682.34	549.232	504.161	590.541	515.152	510.85	455.581	583.6	541.116	539.686	465.998	563.536	555.529	539.451	763.33	821.337	719.658	803.274	759.844	750.296	721.424	773.077	786.983	739.699	681.571	738.054	709.931
MAPKAPK3	uc003day.2	0.128459	0.00474194	24	6.5	64.1116	0.00135071	2.58131e-06	24	1	72.2914	TRUE	562.497	624.014	502.024	499.071	613.659	548.021	531.189	596.549	638.826	533.582	579.989	508.315	501.221	534.03	427.199	458.723	449.922	451.432	408.342	528.134	430.425	489.054	395.281	466.87	1234.2	1219.48	990.075	1006.63	1002.19	959.201	901.78	903.174	908.447	865.037	887.289	868.299	817.42
SVIL	uc001iut.1	0.128459	0.00474194	24	18.5	25.4796	0.0239819	0.00117956	24	17.5	57.772	FALSE	166.393	157.023	169.459	118.137	131.891	143.825	149.349	123.561	166.152	124.282	140.059	185.7	176.383	158.231	217.189	134.042	175.441	193.961	185.382	181.546	206.32	209.394	185.176	192.241	222.272	162.765	183.186	209.461	199.427	155.944	182.555	195.146	263.171	219.855	280.525	215.007	274.973
CTGF	uc003qcz.3	0.141355	0.00588624	24	19.5	1066.38	0.00884927	0.000185139	24	19.5	1822.96	FALSE	3451.55	5746.64	3257.86	5663.37	3758.89	4146.12	4314.18	3500.91	4583.5	4099.63	4991.86	3928.03	5197.42	5074.69	6189	4249.14	5747.11	4498.87	6623.66	5514.04	8261.68	5822.27	6760.13	6014.39	7703.49	8831.88	6354.8	9442.03	5778.35	6108.29	5780.19	5866.88	7287.82	5843.62	7779.88	6253.82	6409.38
KIF20A	uc003lcj.3	0.141355	0.00588624	24	6.5	327.762	0.00368554	3.0027e-05	24	9.5	414.091	FALSE	2838.99	2010.71	3641.26	2562.86	3308.26	2363.19	3448.88	2600.1	2701.4	2596.66	3097.47	2647.01	2598.71	2432.8	2132.41	2245.95	2238.29	2212.53	2317.28	2016.81	2475.84	2072.86	2550.92	1922.41	1049.94	941.532	1384.8	1197.79	1544.93	1550.61	1704.58	1621.21	1280.43	1635.56	1514.83	1484.38	1749.83
PMEPA1	uc002xyq.4	0.141355	0.00588624	24	18.5	145.424	0.0519784	0.00474194	24	18	252.017	FALSE	509.487	730.056	599.463	725.702	630.145	699.285	648.204	665.637	822.166	672.777	854.721	769.554	721.7	1028.5	908.247	778.935	769.677	842.787	1022.11	991.901	1095.63	1061.02	1032.71	1092.63	1275.14	1509.96	1164.54	1710.26	1292.49	1506.48	1431.85	1376.03	1599.27	1590.35	1886.79	1453.37	1747.33
IGFBP5	uc002vgj.4	0.141355	0.00588624	24	17.5	134.607	0.0462294	0.00380362	24	16.5	56.0979	FALSE	117.8	124.395	118.622	65.0962	128.227	119.027	129.333	139.505	217.716	142.509	201.111	215.601	216.069	319.288	308.732	315.744	249.013	293.516	345.713	338.336	430.425	341.494	357.296	368.788	84.8144	82.6345	85.0505	83.3778	116.122	76.5007	90.178	95.0709	129.055	86.2983	126.756	117.841	184.982
INCENP	uc001nsw.1	0.141355	0.00588624	24	4	106.798	0.0033118	2.16523e-05	24	7	262.207	FALSE	1699.27	1370.38	1724.25	1581.6	2025.99	1636.63	1658.23	1704.62	1569.85	1681.94	1572.97	1668.15	1386.08	1356.27	1540.07	1343.4	1485.59	1424.67	1806.23	1470.52	1536.73	1540.24	1632.16	1553.62	1125.98	1219.48	1328.1	1214.06	1499.49	1324.05	1451.65	1411.05	1270.31	1331.46	1155.35	1037.82	1094.89
LMCD1	uc003bqq.4	0.141355	0.00588624	24	18.5	102.411	0.14296	0.0238555	24	17.5	88.2089	FALSE	294.501	401.735	309.263	508.714	313.241	565.38	375.681	399.914	422.542	420.9	509.96	549.232	620.28	570.762	649.773	519.787	554.62	571.585	633.807	612.305	839.507	601.48	709.843	672.842	374.353	318.018	351.106	439.259	381.184	323.657	431.095	350.261	298.598	456.148	480.009	374.196	464.955
POC1A	uc003dcu.3	0.141355	0.00588624	24	5.5	53.2636	0.031144	0.00191087	24	7	55.0107	FALSE	459.422	503.698	463.895	392.988	633.809	535.623	521.951	503.546	514.212	422.557	529.712	453.234	457.126	483.17	398.48	399.148	387.668	427.401	428.384	402.702	425.09	393.492	403.59	411.944	365.579	405.66	316.213	433.158	459.44	491.37	444.291	485.362	354.269	410.944	409.358	353.522	467.454
NUDT15	uc001vbw.1	0.141355	0.00588624	24	6	28.7664	0.0776988	0.00895623	24	11.5	17.3794	TRUE	265.051	240.633	275.372	335.125	287.595	233.095	274.063	248.451	289.334	261.82	265.754	256.518	252.816	234.521	224.369	215.957	234.865	212.842	260.537	189.798	240.113	206.583	235.032	211.857	204.724	122.7	165.739	160.655	159.037	170.655	186.954	170.127	184.726	172.597	214.03	196.401	177.483
LCTL	uc002aqc.3	0.141355	0.00588624	24	15.5	20.8723	0.127494	0.0197614	24	16.5	31.4406	FALSE	119.273	128.474	124.976	81.973	113.573	133.906	161.666	140.833	153.261	124.282	143.651	140.062	188.142	163.882	170.521	163.83	203.738	156.199	170.351	160.09	216.991	144.749	178.054	180.471	108.212	120.196	152.655	146.42	133.793	111.809	180.356	142.606	156.891	170.542	201.562	198.468	192.481
KDM6B	uc002giw.1	0.141355	0.00588624	24	17	20.1254	0.14296	0.0238555	24	17.5	41.9624	FALSE	36.8126	57.0994	84.7297	98.8497	69.609	57.0339	76.9839	81.0457	110.291	89.4827	132.877	100.719	94.0709	127.15	84.3628	113.191	118.847	115.003	120.248	122.131	106.717	99.7782	99.7104	107.89	166.704	220.359	157.016	211.495	148.939	161.828	184.755	187.64	384.635	199.308	191.172	190.199	217.479
CAPN2	uc001hob.4	0.156911	0.00727581	24	5	874.337	0.0206922	0.000919932	24	1.5	420.176	FALSE	5371.7	5875.12	4835.95	5991.26	5240.83	5438.06	4437.35	5368.94	4521.91	5022.63	4381.34	5328.65	4225.84	4489.81	3720.94	4578.29	3786.13	4450.81	3614.96	4121.09	3514.55	4400.08	3672.67	4274.41	7946.23	8471.29	7292.53	8880.76	7320.75	7864.86	7174.65	7555.64	6844.98	7966.15	6520.64	7151.06	6449.37
GHITM	uc001kcs.1	0.156911	0.00727581	24	5.5	358.663	0.00995245	0.000245257	24	4	205.644	FALSE	5222.98	4735.17	4935.51	4730.32	4742.57	4810.69	4568.22	4534.57	4249.77	4334.94	4244.88	4493	4571.26	4238.33	4158.91	4110.63	4128.53	4270.58	3878	4050.12	3747.55	4083.88	3824.61	3799.7	5518.79	5549.03	5578.44	6054.04	5750.58	5613.98	5164.34	5551.64	5379.83	5629.93	4945.54	5637.74	5099.5
ZWINT	uc001jka.1	0.156911	0.00727581	24	5	280.668	0.00220367	7.75784e-06	24	6	370.67	FALSE	2704.99	2644.92	2402.09	2350.69	2749.56	2566.53	2474.26	2630.66	2383.42	2452.49	2352.28	2404.66	2081.32	1927.03	2130.61	2141.7	2209.99	2131.86	2319.78	2193.4	1851.54	2023.67	2197.19	2002.83	1956.58	1863.03	2006.32	2153.59	2173.51	2203.81	2155.47	2186.63	2075	1999.24	1728.86	1749	1669.84
ANXA7	uc001jtz.2	0.156911	0.00727581	24	4	247.632	0.0405356	0.00303752	24	4.5	231.651	FALSE	3266.02	3085.4	3226.08	3259.63	3099.43	2921.13	2893.05	3015.96	2801.67	2861.79	2953.82	2872.06	2800.08	2836.86	2620.63	2628.72	2631.62	2736.05	2562.79	2668.72	2539.87	2633.58	2480.89	2554.05	3547.58	3678.49	3478.35	3516.1	3564.45	3516.09	3305.79	3385.03	3471.84	3445.77	3200.06	3518.68	3334.67
FEN1	uc001nsg.3	0.156911	0.00727581	24	6	198.952	0.0239819	0.00117956	24	5	356.628	FALSE	2238.21	2408.37	1912.77	2439.9	2447.31	2437.58	1981.56	2149.7	2238.75	2144.27	2260.7	1992.34	2068.09	2020.27	2100.1	1924.25	1952.49	1797.14	1941.5	1947.49	1767.95	1825.52	1979.96	1855.71	1895.16	1797.93	1977.97	1854.65	1789.8	1850.73	1823.35	1768.82	1558.78	1598.57	1292.49	1358.27	1264.88
NPLOC4	uc002kau.3	0.156911	0.00727581	24	5	128.047	0.0136111	0.000423037	24	5.5	154.076	FALSE	1755.23	1802.71	1631.05	1868.5	1738.39	1554.79	1676.71	1676.72	1496.8	1693.54	1601.7	1578.45	1463.98	1421.25	1531.1	1513.19	1400.7	1513.93	1347.78	1435.86	1442.46	1510.73	1501.59	1428.07	1819.12	1747.84	1753.35	1803.81	1724.16	1756.57	1662.79	1853.88	1561.31	1676.65	1562.63	1655.97	1544.85
CDCA3	uc001qrg.2	0.156911	0.00727581	24	6	120.561	0.00266945	1.10086e-05	24	8.5	111.863	FALSE	910.009	740.252	1004.05	716.058	1209	1006.77	1022.35	876.888	880.892	836.829	894.225	857.683	740.808	706.389	744.906	682.127	800.804	750.097	741.53	655.216	771.92	623.965	814.302	625.763	435.771	438.213	451.422	516.536	605.855	585.525	574.06	675.504	541.526	581.486	488.321	489.969	542.447
TRAPPC4	uc010ryo.2	0.156911	0.00727581	24	4	112.341	0.0182905	0.00071381	24	4	83.1935	FALSE	901.174	972.728	932.027	942.689	914.076	942.299	866.838	843.672	840.786	820.258	969.642	797.881	736.399	734.644	787.985	668.723	718.743	835.921	716.478	757.542	634.966	684.394	715.778	743.461	1000.23	1116.82	957.363	1136.79	1075.39	1271.09	928.173	1068.3	1042.56	971.883	922.614	1023.35	924.91
C1QBP	uc002gby.1	0.156911	0.00727581	24	4.5	111.812	0.0884636	0.0109801	24	1	163.257	FALSE	2431.11	2092.28	2075.88	1964.94	2403.34	2127.61	1893.8	2216.13	2021.04	1933.82	1849.5	1902.64	1847.61	2037.22	1750.08	2007.66	1675.18	1879.53	1560.72	1846.82	1430.01	1895.79	1522.96	1983.22	2664.34	2927.26	2671.46	2759.6	2549.64	2530.41	2472.2	2451.83	2745.58	2603.33	2183.94	2578.02	2122.29
RACGAP1	uc009zlm.1	0.156911	0.00727581	24	4.5	110.43	0.0033118	2.16523e-05	24	7	172.511	FALSE	1691.91	1394.86	1942.43	1600.88	1725.57	1482.88	1752.15	1713.92	1473.88	1721.71	1583.75	1655.56	1472.8	1378.87	1423.4	1294.25	1375.23	1513.93	1453	1427.61	1554.51	1444.68	1546.7	1212.29	1029.47	921.5	1103.48	1067.64	1130.93	1073.95	1249.29	1178.38	976.77	1111.6	893.523	1083.31	994.903
RAD51C	uc002iwu.3	0.156911	0.00727581	24	5	97.0164	0.00884927	0.000185139	24	6.5	163.856	FALSE	1076.4	840.176	923.554	853.483	910.413	890.225	877.616	829.057	772.034	762.26	825.991	804.176	873.095	788.33	728.751	729.786	786.655	702.036	653.849	716.281	649.195	681.584	576.896	670.881	1128.91	1019.16	1079.49	1193.73	1135.98	1212.24	1225.1	1130.84	971.709	1212.29	960.017	1050.23	989.903
RAE1	uc010git.1	0.156911	0.00727581	24	3	76.4067	0.0462294	0.00380362	24	7	45.6721	FALSE	946.821	989.043	1027.35	1188.61	906.749	877.826	925.346	864.93	797.816	904.77	869.086	878.141	839.289	762.9	798.754	711.914	783.826	834.204	781.612	772.395	695.439	803.847	775.13	735.615	997.301	908.98	996.617	998.5	987.04	1053.36	1027.15	960.717	1115.95	1019.14	972.485	1002.68	867.415
ELAC2	uc002gnz.4	0.156911	0.00727581	24	7	71.1577	0.162076	0.0286919	24	8	36.0037	FALSE	762.758	813.666	707.493	834.195	846.299	803.434	755.982	810.457	807.842	782.145	865.495	761.685	805.482	774.202	680.288	711.914	619.703	693.454	641.323	737.737	643.859	695.637	629.125	637.533	1216.65	1304.62	1072.94	1049.34	1093.06	1094.55	1071.14	1068.3	1174.15	1099.28	1076.38	1130.86	939.908
NEGR1	uc001dfw.3	0.156911	0.00727581	24	4.5	70.8577	0.0592317	0.00588624	24	3	64.1058	FALSE	631.705	658.682	709.611	638.907	657.622	783.596	580.458	655.008	519.941	565.067	515.347	648.377	555.606	601.843	463.098	594.255	427.284	583.6	470.971	567.744	499.791	553.699	474.811	566.914	780.878	743.711	732.743	750.401	752.271	770.892	648.841	708.028	673.111	762.301	633.778	744.256	707.431
DTYMK	uc002wbz.2	0.156911	0.00727581	24	5	62.7307	0.0182905	0.00071381	24	9.5	39.8279	TRUE	799.571	866.687	826.115	877.593	895.758	892.705	834.505	906.117	880.892	856.714	867.291	738.079	661.436	943.735	737.726	819.148	744.21	717.484	784.117	830.16	754.134	789.794	785.813	768.963	555.681	588.458	575.726	581.611	598.282	612.006	688.432	705.526	589.605	532.173	629.622	630.55	602.441
METTL17	uc001vyo.3	0.156911	0.00727581	24	8	50.1408	0.0592317	0.00588624	24	5	48.7669	FALSE	681.77	838.137	745.622	773.921	767.531	699.285	745.204	761.298	726.199	788.773	720.049	720.768	721.7	774.202	673.108	710.425	673.467	635.094	691.426	686.574	578.051	653.477	677.793	604.185	760.405	756.231	765.454	807.341	835.576	859.162	655.44	868.148	771.8	809.56	710.662	686.37	682.433
ABCG1	uc011aev.2	0.156911	0.00727581	24	16	37.7383	0.14296	0.0238555	24	14	56.9163	FALSE	61.8452	61.1779	120.74	24.1097	89.759	39.6758	155.507	53.1447	210.555	87.8256	278.323	91.2763	252.816	98.8944	280.013	99.7871	308.437	118.436	248.012	117.18	224.106	96.9676	227.91	113.775	166.704	220.359	244.248	268.436	219.623	255.983	268.334	240.179	215.092	297.934	334.552	297.703	352.466
CENPO	uc002rfq.2	0.156911	0.00727581	24	7	34.6234	0.00691322	0.000103608	24	7.5	66.4596	FALSE	695.023	585.268	758.331	489.427	663.118	637.292	688.236	693.538	658.878	624.722	637.45	654.672	629.099	632.924	644.388	658.297	574.428	631.661	568.673	523.182	537.142	595.859	625.564	576.722	336.333	368.099	433.976	402.654	449.343	467.831	468.485	430.321	435.245	404.78	388.578	370.061	419.959
NEIL3	uc003iut.2	0.156911	0.00727581	24	6	27.8002	0.00368554	3.0027e-05	24	7	55.1017	FALSE	235.601	201.887	321.973	231.453	252.791	243.014	227.872	237.823	174.746	245.249	210.089	209.306	221.949	192.138	220.779	195.106	212.227	216.275	172.857	165.042	158.297	175.666	198.234	166.739	172.553	105.171	185.366	183.025	199.427	232.445	197.952	175.131	184.726	189.034	139.223	192.266	159.984
SCEL	uc001vki.3	0.156911	0.00727581	24	16	15.6221	0.00308165	1.54982e-05	24	20	26.1106	FALSE	69.2078	75.4527	61.429	24.1097	62.2818	61.9934	73.9045	53.1447	83.076	77.8831	89.7816	95.9975	136.697	33.9066	100.517	67.0212	93.3799	108.138	120.248	89.1225	154.74	91.3463	128.199	86.3121	55.5681	70.1141	56.7003	54.9074	63.1099	38.2504	41.7898	35.0261	55.6708	39.0397	35.3253	35.1454	77.4924
RPL8	uc003zeb.3	0.171897	0.00895623	24	5	1208.68	0.180872	0.0343842	24	23	266.924	TRUE	14299.5	16813.7	12095.2	16208.9	15925.8	14995	13786.3	14698.5	14203.1	14169.8	14485.4	14053.4	12252.7	14579.9	11999.3	12865.1	12688.4	12698.4	11851.9	12995.4	11941.6	13309.9	12076.8	13082.2	15076.5	16677.1	14772.6	16693.9	14734.9	14685.2	14699	15213.9	15899.1	14465.2	14310.9	12991.4	13913.6
ATP5B	uc001slr.3	0.171897	0.00895623	24	6.5	318.129	0.0154744	0.00055099	24	4	415.43	FALSE	7325.72	6906.98	7684.99	6842.33	7710.12	6948.22	7610.63	6763.99	7538.43	6616.75	7460.85	6631.7	7413.96	6657.01	6702.36	6107.86	6904.46	6544.9	6423.25	6415.17	6500.85	6322.57	6515.6	6314.52	7800	8223.38	7955.49	8126.29	8446.64	8379.77	7893.87	7805.82	8054.56	7462.74	7295.72	7601.75	7219.3
OLFML3	uc001eer.1	0.171897	0.00895623	24	18	159.248	0.031144	0.00191087	24	19	36.7196	FALSE	438.807	520.012	646.064	414.687	626.481	679.447	603.554	658.994	760.575	629.693	757.757	763.259	740.808	881.573	782.6	871.276	843.249	859.952	886.829	868.12	937.331	860.06	949.623	980.82	368.504	410.668	433.976	425.024	424.099	444.293	382.706	340.254	366.921	371.904	450.917	359.724	517.45
NCAPH	uc002svz.1	0.171897	0.00895623	24	6	155.447	0.00368554	3.0027e-05	24	6.5	424.239	FALSE	3177.67	2112.68	2912.58	2213.27	3082.95	2313.59	2642.09	2331.72	2307.51	2212.21	2240.95	2218.96	2351.77	1975.06	2290.36	2003.19	2178.87	2022	2154.44	1855.07	2072.09	1881.73	2118.85	1822.36	1441.85	1357.21	1788.24	1734.67	1825.14	1677.13	1689.19	1766.32	1485.4	1460.91	1217.68	1391.35	1204.88
ARL6IP1	uc002dfl.1	0.171897	0.00895623	24	6	121.763	0.00117766	1.18453e-06	24	10.5	160.493	TRUE	1251.63	1048.18	1637.4	1232.01	1445.3	1304.34	1471.93	1377.78	1294.84	1415.15	1305.43	1394.32	1125.91	1251.72	1005.17	1248.08	1165.83	1251.31	1164.9	1062.87	1319.73	1143.94	1251.13	1135.79	652.194	791.288	802.528	833.778	992.088	903.297	1090.93	1018.26	991.953	1084.89	989.109	1023.35	1059.9
CYFIP2	uc021ygn.1	0.171897	0.00895623	24	16	100.834	0.180872	0.0343842	24	17	236.772	FALSE	687.66	717.821	741.385	658.195	780.354	761.279	806.791	825.072	922.43	777.174	922.955	821.487	777.555	898.526	980.045	832.552	998.882	913.162	966.995	927.535	1061.83	872.708	1062.39	886.661	1672.89	1812.95	1609.42	1978.7	1817.57	2000.79	1906.93	1971.47	1753.63	2350.6	2154.84	2168.68	2107.29
RPN1	uc003ekr.1	0.171897	0.00895623	24	7	86.9075	0.067985	0.00727581	24	2	86.9145	FALSE	3825.57	4058.13	3730.23	3908.18	3705.77	3895.66	3766.05	4007.11	3928.92	3746.67	3767.24	3792.69	3754.02	3913.39	3530.67	3669.78	3622.01	3729.89	3412.04	3665.58	3459.41	3696.01	3329.62	3727.11	3661.64	3635.92	3613.56	3646.26	3521.54	3513.15	3321.19	3470.09	3499.67	3382.07	3414.09	3376.03	3347.17
CHAC2	uc002rxk.1	0.171897	0.00895623	24	4.5	72.3571	0.127494	0.0197614	24	5.5	93.9398	FALSE	581.64	526.13	533.797	585.866	496.422	562.9	418.792	499.56	386.733	417.586	368.105	404.449	399.801	395.578	303.347	390.212	393.328	401.654	313.146	343.287	327.266	347.116	307.44	327.594	424.072	500.815	457.964	445.36	482.16	444.293	371.709	407.804	455.489	417.108	322.084	411.408	272.473
CEP85	uc001bls.1	0.171897	0.00895623	24	6	67.2743	0.0239819	0.00117956	24	5	88.9319	FALSE	845.218	672.957	699.02	742.579	754.708	612.495	655.903	677.595	587.261	681.063	520.733	626.344	607.051	531.204	567.205	579.361	580.088	561.286	556.147	521.532	490.898	562.131	515.17	576.722	535.208	563.417	643.331	612.115	691.685	582.582	578.459	575.429	511.16	540.391	436.372	516.845	467.454
PITRM1	uc009xhv.2	0.171897	0.00895623	24	5	60.4838	0.0355671	0.00241479	24	1.5	47.7218	FALSE	471.202	483.305	495.669	472.55	439.636	488.508	377.221	430.472	382.436	381.13	432.747	371.4	367.464	421.008	367.966	352.978	362.201	386.206	328.177	323.482	295.25	408.95	334.742	343.287	786.727	706.149	671.681	715.829	714.405	632.602	629.046	637.976	657.928	651.346	525.724	614.011	504.951
DNAJA3	uc002cwk.3	0.171897	0.00895623	24	5	51.3943	0.00501822	5.65319e-05	24	3	43.3128	FALSE	460.894	520.012	493.551	489.427	553.209	577.778	440.348	528.79	486.997	462.327	418.382	503.593	404.211	480.344	369.761	495.957	398.987	427.401	420.868	452.214	345.052	442.678	372.727	406.059	777.953	823.841	782.901	740.232	679.063	765.007	653.24	778.081	660.459	708.879	677.415	642.955	597.442
EEF2	uc002lze.3	0.185024	0.0109801	24	4.5	1491.55	0.0405356	0.00303752	24	20	1366.61	TRUE	20719.6	23082.4	17354.8	21857.8	22417.8	20978.6	19443	20394.3	20519.8	19759.1	20701.9	19596.1	18427.6	20061.4	17132.8	18149.3	17977.1	18469.2	17548.7	18339.4	17937.4	18867.9	17628.6	18755.2	25257.1	27950.5	23598.2	28232.5	24504.3	24865.7	23760.8	23297.4	27207.9	24745	23397.8	22108.5	24700.1
ANXA1	uc004ajg.1	0.185024	0.0109801	24	6.5	701.324	0.0519784	0.00474194	24	7.5	732.52	FALSE	7228.53	6382.89	7790.9	6721.78	6413.19	6472.11	6395.82	6775.95	5942.8	6572.01	5801.69	6373.61	6377.71	5362.9	5402.81	5982.76	5475.46	6115.78	5138.1	5585.01	4853.85	5348.67	4821.71	5270.92	8455.12	7554.8	8642.44	8874.66	9060.06	8562.2	8610.89	8323.71	8649.23	8790.09	7744.56	9030.31	7491.77
COL4A1	uc001vqw.4	0.185024	0.0109801	24	18.5	476.905	0.0462294	0.00380362	24	20.5	247.556	FALSE	3174.72	2753	3226.08	2442.31	2980.37	2757.47	3179.43	2475.21	3291.53	2396.15	3424.27	2854.75	3446.82	3628.01	3853.77	3047.23	3568.25	2787.55	4343.96	3482.38	4309.59	3662.28	4117.8	3650.61	2746.23	2611.75	2298.54	2653.86	2279.53	2142.02	2280.84	2344.25	2310.34	2570.46	2738.75	2456.05	2482.26
PSMC3	uc001nfh.2	0.185024	0.0109801	24	6	418.275	0.162076	0.0286919	24	5	215.313	FALSE	3807.9	4141.74	3914.51	4742.38	3824.83	4265.14	3609	4256.89	3726.96	4041.64	3537.4	4189.27	3601.15	3772.11	3284.77	3815.74	3344.7	3450.1	3304.32	3682.08	3244.2	3780.33	3307.06	3438.75	4091.56	4004.02	3757.49	4099.75	4235.94	3986.86	3802.87	3920.43	4084.22	4041.64	3584.48	3673.73	3802.13
ARHGDIA	uc021uff.1	0.185024	0.0109801	24	5	379.032	0.100909	0.0134079	24	3	381.877	FALSE	5368.76	6066.81	5153.69	5480.13	5924.09	6159.66	4913.11	5750.26	5551.77	5430.27	5187.58	5478.15	4550.68	5523.96	4435.33	5258.93	4734.08	5010.38	4464.21	5190.56	4425.2	5105.55	4649.59	5231.69	7071.77	7993.01	6889.09	7701.26	6856.26	7620.65	6567.59	6689.99	6844.98	6593.6	6279.59	5726.64	5981.92
CRYAB	uc001pmf.1	0.185024	0.0109801	24	18	314.297	0.0776988	0.00895623	24	19.5	216.167	FALSE	2033.53	2441	2092.82	2697.87	2476.62	2658.28	2384.96	2654.58	2575.36	3045.73	2779.64	2587.21	2454.66	2884.89	2796.54	2998.08	2702.36	3381.45	3076.35	3488.98	3050.33	3506.29	2928.4	3670.23	2389.43	2624.27	2298.54	2348.81	2332.54	2706.95	2206.06	2324.23	2310.34	2360.87	2614.07	2526.34	2477.26
ADSL	uc003ayp.4	0.185024	0.0109801	24	6	308.951	0.113943	0.0163087	24	4	209.461	FALSE	3541.38	3364.78	3412.49	3247.58	3449.31	3449.31	3133.24	3438.46	3161.18	3320.8	3187.25	3312.7	3132.27	3410.44	2889.88	2998.08	2889.12	3166.89	2783.24	3097.83	2612.79	2885.14	2768.15	2873.8	4199.78	4412.18	4174.02	4506.47	4147.59	4519.43	3934.84	4125.58	4015.89	3992.32	3871.24	4155.43	3897.12
LBH	uc002rne.2	0.185024	0.0109801	24	18	266.398	0.0206922	0.000919932	24	18	58.0001	FALSE	235.601	187.612	423.649	238.686	305.913	327.325	443.427	290.967	515.644	399.358	538.69	338.352	689.363	443.612	872.348	521.276	780.996	521.807	836.726	673.37	1004.92	704.069	1023.22	784.656	169.629	125.204	213.717	95.5795	179.232	141.232	193.553	127.595	169.543	160.268	247.277	190.199	207.48
IPO4	uc001wmz.2	0.185024	0.0109801	24	6	227.801	0.00884927	0.000185139	24	2	198.677	FALSE	1680.13	1572.27	1264.59	1304.33	1687.1	1656.46	1307.19	1400.36	1468.15	1300.81	1458.05	1428.95	1087.69	1443.86	1023.12	1215.32	1103.58	1261.61	914.386	1130.54	814.607	1170.64	917.573	1124.02	2518.11	2997.38	2294.18	2875.52	2274.48	2518.64	2032.3	2359.26	2371.07	2208.82	1811.98	2131.47	1784.83
CDC37	uc002mof.1	0.185024	0.0109801	24	4.5	154.855	0.00793786	0.000138924	24	3	240.675	FALSE	1394.46	1496.82	1188.33	1540.61	1509.42	1453.12	1216.35	1392.39	1267.62	1317.38	1258.74	1381.73	1053.89	1229.12	1032.1	1262.98	1018.69	1136.3	1124.82	1328.59	1020.93	1224.04	1073.07	1192.68	2652.64	2902.22	2381.41	2680.29	2537.02	2377.41	2408.41	2521.88	2527.96	2330.05	2246.27	2402.29	2179.79
ATL3	uc001nxk.1	0.185024	0.0109801	24	7	154.046	0.0275044	0.00150497	24	6	155.687	FALSE	2487.06	2220.76	2516.47	2471.24	2203.68	2340.87	2338.77	2375.57	2243.05	2258.61	2165.53	2313.38	2417.92	2073.96	2195.23	2095.53	2125.1	2246.86	1833.78	2064.67	1924.46	2112.21	2039.32	1991.06	1971.2	1737.83	2025.95	2015.3	1938.74	1977.25	1909.13	2009	1839.67	1873.9	1922.11	1889.58	1919.81
HJURP	uc002vvg.3	0.185024	0.0109801	24	5	152.776	0.00169817	3.75778e-06	24	6.5	192.117	FALSE	1596.2	1129.75	1431.93	1109.05	1540.56	1470.48	1379.55	1388.41	1207.47	1300.81	1151	1194.46	1084.75	1217.81	1270.83	1020.21	1134.71	1057.35	1282.65	1006.75	1202.35	1056.81	1291.49	1063.21	760.405	828.849	957.363	900.887	989.564	891.528	963.364	1010.75	948.935	869.147	816.638	746.324	799.922
GALNT2	uc010pwa.1	0.185024	0.0109801	24	18.5	119.208	0.180872	0.0343842	24	18.5	155.276	FALSE	2635.79	2626.57	2829.97	3013.71	2535.23	2928.57	2498.9	2913.66	2793.07	2813.73	2896.36	2957.04	2848.58	2921.62	3087.32	3051.7	2897.61	2832.18	3184.07	3243.07	3135.7	3164.8	2889.23	3144.51	3939.48	3781.15	3938.49	4000.1	3874.95	3580.82	3822.67	3640.22	3823.57	4019.03	4006.31	3783.3	4084.6
HTATIP2	uc001mpx.2	0.185024	0.0109801	24	6	106.752	0.067985	0.00727581	24	5.5	89.3821	FALSE	752.45	909.511	728.676	865.538	646.631	924.941	711.331	939.333	656.014	889.856	718.253	868.699	662.906	655.529	513.357	731.276	599.895	641.96	593.725	694.826	474.891	601.48	535.35	612.031	938.808	921.5	966.086	1112.38	1002.19	947.432	980.96	905.676	842.654	1031.47	1024.43	961.331	797.422
PNRC1	uc003pmv.3	0.185024	0.0109801	24	18	101.385	0.0355671	0.00241479	24	15.5	97.1506	FALSE	273.886	181.494	290.199	195.289	232.641	215.737	306.396	183.349	409.65	258.506	371.696	321.041	449.776	288.207	396.685	376.808	373.52	382.773	400.827	467.068	449.99	393.492	424.956	460.985	242.745	358.083	355.467	268.436	333.221	364.85	376.108	350.261	366.921	400.67	507.022	415.543	459.955
PFKM	uc001rrb.2	0.185024	0.0109801	24	6	74.5538	0.0405356	0.00303752	24	5	96.3987	FALSE	1236.9	1168.5	1249.76	1352.55	1267.62	1150.6	1274.85	1279.46	1281.95	1156.65	1215.64	1199.18	1202.34	1028.5	1112.87	1121.49	1120.56	1084.81	1202.48	1137.14	1104.52	1110.21	1073.07	1127.94	2029.7	1840.5	1923.45	1752.97	2001.85	1944.88	1887.14	1866.39	1852.32	1851.3	1907.57	1817.23	1659.84
OSBPL9	uc001csu.3	0.185024	0.0109801	24	17	48.6249	0.0519784	0.00474194	24	6.5	32.3005	TRUE	767.175	723.938	870.598	634.085	736.39	694.326	820.648	754.655	763.44	745.689	757.757	756.964	798.133	641.401	886.707	798.297	846.079	892.564	871.798	807.054	988.911	808.063	782.252	855.275	669.741	648.556	693.489	705.661	694.209	703.218	673.035	695.519	614.91	669.839	667.025	715.313	637.438
TSPYL4	uc003pwn.3	0.185024	0.0109801	24	17	43.8899	0.0519784	0.00474194	24	20.5	91.554	FALSE	559.552	575.072	491.432	600.331	507.413	530.663	561.982	558.019	524.238	578.323	585.376	610.607	545.317	621.622	621.054	689.574	650.83	597.332	568.673	683.273	725.676	708.285	595.888	796.425	930.034	856.394	708.754	797.173	661.392	794.431	701.628	755.564	645.276	741.754	827.028	789.739	809.921
ADAMTSL4	uc009wlw.3	0.185024	0.0109801	24	16	22.2969	0.0776988	0.00895623	24	15.5	9.30788	FALSE	20.6151	26.5104	40.2466	36.1645	36.6363	34.7163	73.9045	45.173	87.373	74.5689	98.7598	44.0644	85.2517	59.3366	141.801	81.9148	116.018	89.2564	105.217	64.3663	174.304	82.9143	138.882	103.967	14.6232	17.5285	19.627	12.2016	7.57319	23.5387	17.5957	27.5205	25.3049	10.2736	39.4812	33.0781	14.9985
MCF2L	uc010tjr.2	0.185024	0.0109801	24	20	19.3713	0.113943	0.0163087	24	18	30.2278	FALSE	85.4053	116.238	122.858	101.261	128.227	106.629	76.9839	90.346	100.264	112.682	141.855	102.292	97.0106	87.5922	134.622	101.276	121.677	108.138	175.362	146.887	168.969	154.586	162.623	135.353	119.91	145.236	163.559	132.184	116.122	135.347	127.569	112.584	144.238	139.721	189.094	188.131	154.985
[truncated: 11 more columns]
