# Supplementary material for: Ribosome profiling reveals an important role for translational control in circadian gene expression
Source: HighWire-hosted journal article supplement (doi:10.1101/gr.191296.115), 2015-09-03
Supplement: Supplemental_Table_S3.xlsx [file Supplemental_Table_S3.xlsx]

## Sheet: Table S3
Supplementary Table S3: NIH DAVID results genes with RPF cycles in with wild-type and siARNTL.
Lists of the top twelve enriched Gene Ontology (GO) terms for biological processes, using the genes listed in Supplementary Table S2. GO term id, number of genes, DAVID p-values, gene symbols, fold enrichment, Benjamini-corrected p-values, and FDR values are listed for each enriched GO term.
RPF Cyclers in both WT and KD (WT - BHQ < 0.2; KD - BHQ < 0.2)
	Term	Count	PValue	Genes	Fold Enrichment	Benjamini	FDR
	GO:0022402~cell cycle process	34	7.94261e-16	RAD51C, KIFC1, NEK2, AURKB, PTTG1, PSMB5, KIF2C, PSMB7, CDCA8, NCAPH, INCENP, PSMD2, PSMD4, CCNA2, BUB3, CDCA3, MAP2K1, CDC20, RACGAP1, UBE2C, TACC3, CDK2, CDC25B, CCNB1, PA2G4, PSMC5, PSMA5, FANCD2, PSMD11, PLK1, PSMC3, ZWINT, APBB2, KPNA2	5.75655	1.07014e-12	1.27676e-12
	GO:0007049~cell cycle	40	1.11465e-15	RAD51C, KIFC1, NEK2, FOXM1, DTYMK, AURKB, PTTG1, PSMB5, KIF2C, PSMB7, CDCA8, CDC45, NCAPH, HJURP, INCENP, PSMD2, PSMD4, CCNA2, BUB3, CDCA3, MAP2K1, ANXA1, CDC20, RACGAP1, UBE2C, TACC3, CDK2, CDC25B, CCNB1, UHRF1, PA2G4, PSMC5, PSMA5, FANCD2, PSMD11, PLK1, PSMC3, ZWINT, APBB2, KPNA2	4.66987	7.64389e-13	1.82077e-12
	GO:0000278~mitotic cell cycle	28	1.60584e-14	KIFC1, NEK2, AURKB, PTTG1, PSMB5, KIF2C, CDCA8, NCAPH, PSMB7, INCENP, PSMD2, PSMD4, CCNA2, BUB3, CDCA3, MAP2K1, CDC20, UBE2C, CDK2, CDC25B, CCNB1, PSMC5, PSMA5, PLK1, PSMD11, PSMC3, ZWINT, KPNA2	6.67526	7.38909e-12	2.64677e-11
	GO:0051439~regulation of ubiquitin-protein ligase activity during mitotic cell cycle	13	4.14668e-14	CCNB1, PSMB5, PSMB7, PSMC5, PSMD11, PSMC3, PLK1, PSMA5, PSMD2, PSMD4, CDC20, UBE2C, BUB3	28.6974	1.42558e-11	6.809e-11
	GO:0051438~regulation of ubiquitin-protein ligase activity	13	2.4978e-13	CCNB1, PSMB5, PSMB7, PSMC5, PSMD11, PSMC3, PLK1, PSMA5, PSMD2, PSMD4, CDC20, UBE2C, BUB3	24.7327	6.8795e-11	4.1076e-10
	GO:0031145~anaphase-promoting complex-dependent proteasomal ubiquitin-dependent protein catabolic process	12	4.02143e-13	CCNB1, PSMB5, PSMB7, PSMC5, PSMD11, PSMC3, PSMA5, PSMD2, PSMD4, CDC20, UBE2C, BUB3	29.4083	9.22872e-11	6.61227e-10
	GO:0051340~regulation of ligase activity	13	4.61804e-13	CCNB1, PSMB5, PSMB7, PSMC5, PSMD11, PSMC3, PLK1, PSMA5, PSMD2, PSMD4, CDC20, UBE2C, BUB3	23.496	9.0853e-11	7.59437e-10
	GO:0031398~positive regulation of protein ubiquitination	13	4.97536e-13	CCNB1, PSMB5, PSMB7, PSMC5, PSMD11, PSMC3, PLK1, PSMA5, PSMD2, PSMD4, CDC20, UBE2C, DNAJA3	23.3501	8.56306e-11	8.18046e-10
	GO:0051437~positive regulation of ubiquitin-protein ligase activity during mitotic cell cycle	12	5.82908e-13	CCNB1, PSMB5, PSMB7, PSMC5, PSMD11, PSMC3, PLK1, PSMA5, PSMD2, PSMD4, CDC20, UBE2C	28.4441	8.91787e-11	9.58433e-10
	GO:0031396~regulation of protein ubiquitination	14	8.57188e-13	CDC20, UBE2C, PSMB5, CCNB1, PSMB7, PSMC5, PLK1, PSMC3, PSMD11, PSMA5, PSMD2, PSMD4, DNAJA3, BUB3	18.6569	1.18037e-10	1.40953e-09
	GO:0051443~positive regulation of ubiquitin-protein ligase activity	12	1.17938e-12	CCNB1, PSMB5, PSMB7, PSMC5, PSMD11, PSMC3, PLK1, PSMA5, PSMD2, PSMD4, CDC20, UBE2C	26.6937	1.47638e-10	1.93932e-09
	GO:0051351~positive regulation of ligase activity	12	2.2792e-12	CCNB1, PSMB5, PSMB7, PSMC5, PSMD11, PSMC3, PLK1, PSMA5, PSMD2, PSMD4, CDC20, UBE2C	25.1462	2.61536e-10	3.74774e-09
