# Supplementary material for: Ribosome profiling reveals an important role for translational control in circadian gene expression
Source: HighWire-hosted journal article supplement (doi:10.1101/gr.191296.115), 2015-09-03
Supplement: Supplemental_Table_S4.xlsx [file Supplemental_Table_S4.xlsx]

## Sheet: Table_S4
Supplementary Table S4: RPF cyclers.
Genes that oscillate in the RPF data with a statistical cutoff of FDR < 0.2. Gene symbol, UCSC Gene ID, JTK cycling statistics, circadian period, peak phase (LAG), amplitude, indicator columns for genes phase-shifted in the siARNTL data and RPF-only cyclers, clock factors binding gene promoters (C = CLOCK; A = ARNTL; Y = CRY1), and RPF numbers for both replicates are indicated. This table lists i…
Gene_Symbol	Transcript_ID	WT.FDR	WT.ADJP	WT.PER	WT.LAG	WT.AMP	KD.FDR	KD.ADJP	KD.PER	KD.LAG	KD.AMP	Shifted_in_KD	RPF_only_osc	ChIP_binding_site	WT.CT00_rep1	WT.CT00_rep2	WT.CT02_rep1	WT.CT02_rep2	WT.CT04_rep1	WT.CT04_rep2	WT.CT06_rep1	WT.CT06_rep2	WT.CT08_rep1	WT.CT08_rep2	WT.CT10_rep1	WT.CT10_rep2	WT.CT12_rep1	WT.CT12_rep2	WT.CT14_rep1	WT.CT14_rep2	WT.CT16_rep1	WT.CT16_rep2	WT.CT18_rep1	WT.CT18_rep2	WT.CT20_rep1	WT.CT20_rep2	WT.CT22_rep1	WT.CT22_rep2	KD.CT00_rep1	KD.CT00_rep2	KD.CT02_rep1	KD.CT02_rep2	KD.CT04_rep1	KD.CT04_rep2	KD.CT06_rep1	KD.CT06_rep2	KD.CT08_rep1	KD.CT08_rep2	KD.CT10_rep1
ITM2B	uc001vbz.3	0.00294414	1.18453e-06	24	17	338.804	1	0.654469	24	14	114.656	N	N		2357.48	2383.9	2425.39	2505	2172.53	2164.81	2412.67	2349	2535.25	2399.46	2506.7	2456.59	2898.56	2650.37	2891.67	2984.68	2937.22	3046.73	2693.05	2919.59	3176.61	2872.49	2890.41	2818.88	2184.7	1832.98	2036.85	2060.04	1999.32	2115.54	2023.51	1933.94	2199	2052.67	2107.05
ARNTL	uc001mkr.3	0.00294414	1.18453e-06	24	20	71.7362	1	1	24	12.5	0.371857	N	N		206.151	177.416	105.912	115.727	135.554	81.8313	60.0474	81.0457	64.4555	76.226	46.6865	102.292	89.6613	104.545	193.855	154.893	144.314	145.9	192.898	196.4	177.862	199.556	191.112	170.663	8.77391	0	0	2.03361	2.5244	5.88467	4.39892	15.0112	0	8.21888	6.23388
PPAP2B	uc001cyj.2	0.00770123	5.42231e-06	24	17	29.7216	1	1	24	17.5	2.9722	N	N		94.2404	89.7276	46.6013	98.8497	80.5999	81.8313	87.7616	82.3743	124.614	104.396	109.534	95.9975	146.986	101.72	148.981	116.17	141.485	176.796	120.248	158.44	129.839	151.775	131.76	125.545	102.362	142.732	85.0505	89.4787	103.5	132.405	120.97	107.58	116.403	115.064	91.4302
PGAP1	uc002utw.3	0.00964105	7.75784e-06	24	19	21.4811	0.919723	0.398806	24	14	21.2699	N	Y		144.306	152.945	133.449	94.0278	106.245	116.548	127.793	110.275	111.723	129.253	111.329	138.488	144.046	155.405	157.956	141.489	152.804	159.632	187.888	153.489	183.198	161.613	163.81	158.893	233.971	202.83	215.897	189.125	242.342	217.733	230.944	292.718	187.256	287.661	220.264
CD97	uc002myl.3	0.0109447	1.10086e-05	24	5.5	102.984	0.031144	0.00191087	24	10.5	84.3655	Y	N		831.966	878.922	768.922	1007.79	915.908	880.306	886.854	826.4	820.733	752.318	881.656	813.618	764.326	827.887	585.155	719.361	673.467	617.929	681.405	584.248	698.997	688.61	706.282	735.615	1131.83	1141.86	1094.75	1057.47	1095.59	1153.4	1106.33	1175.88	1153.9	1352.01	1174.05
FUCA1	uc001bie.3	0.0109447	1.10086e-05	24	17	23.6443	0.254232	0.0579452	24	19	9.56208	N	N		181.118	177.416	188.524	154.302	150.209	153.744	178.603	172.72	179.043	200.508	202.907	185.7	216.069	228.87	193.855	226.383	198.079	230.007	250.517	269.018	236.556	189.719	185.176	219.704	131.609	145.236	167.92	160.655	159.037	144.174	138.566	187.64	146.769	135.612	164.159
MLLT11	uc001ewq.3	0.0179389	2.16523e-05	24	5	142.708	0.254232	0.0579452	24	3.5	31.5468	N	N		821.658	897.276	688.429	961.977	881.104	840.63	779.077	805.142	746.251	674.434	730.823	700.31	645.268	695.086	518.742	594.255	577.258	547.554	548.632	613.955	535.364	595.859	562.652	639.494	719.46	831.353	748.008	939.526	757.319	779.719	776.41	705.526	668.05	649.292	667.025
NR1D1	uc002htz.3	0.0255473	4.13437e-05	24	2	72.109	1	1	24	5.5	2.36264	N	N	CA	210.568	130.513	283.845	229.042	181.35	185.98	227.872	127.547	87.373	107.711	125.694	88.1289	79.3723	93.2433	68.2082	71.4893	59.4236	125.302	125.258	115.529	327.266	172.855	188.738	182.432	38.0203	50.0815	61.0619	38.6385	47.9636	50.0197	52.7871	35.0261	48.0794	47.2586	45.7151
TUBB4B	uc004cmh.1	0.0255473	5.65319e-05	24	6	1902.42	0.000865572	5.22373e-07	24	9	858.122	N	N		11784.5	13563.1	12891.6	13149.4	14227.7	13730.3	13653.9	13712.7	13007.1	13616.3	13618.1	13087.1	10628.5	13325.3	10315.6	11678.1	10308.6	11201.7	10652	10835	10428	10892.7	10805.5	10496.7	7700.56	7977.99	8563.93	7967.67	9181.24	8774.04	9576.46	9276.92	9722.15	8935.98	9128.48
PER3	uc001aop.3	0.0255473	5.65319e-05	24	11	125.583	1	1	24	9.5	1.01942	N	N	A	172.283	236.554	374.929	231.453	252.791	295.088	574.3	409.214	633.096	478.898	700.297	440.644	579.124	440.786	358.991	378.297	342.393	393.072	263.043	265.717	282.8	285.281	257.585	321.709	166.704	160.261	135.208	164.722	148.939	147.117	140.766	137.603	189.787	164.378	153.769
LRRN1	uc003bpt.4	0.0255473	5.65319e-05	24	17	86.7674	0.20269	0.0410599	24	15.5	64.3379	N	N		347.511	340.557	406.703	303.782	351.709	367.001	354.126	383.97	339.466	394.387	416.587	428.054	455.656	480.344	529.511	464.68	483.878	552.703	465.961	506.678	634.966	476.406	462.941	521.796	348.032	333.042	457.964	427.057	454.392	411.927	455.289	495.37	339.086	489.023	529.88
CRY1	uc001tmi.4	0.0255473	5.65319e-05	24	12	57.8707	1	1	24	6.5	3.5198	N	N	CAY	247.381	281.418	377.047	313.426	307.745	369.48	354.126	365.37	350.924	372.845	423.769	407.596	467.415	387.101	466.688	355.957	449.922	360.459	318.156	310.278	314.815	326.036	269.456	255.013	415.298	330.538	383.818	416.889	350.891	364.85	338.717	410.306	420.062	380.123	351.175
PLXDC2	uc001iqg.1	0.0255473	5.65319e-05	24	17	53.0013	1	1	24	14.5	2.84894	N	N		175.228	181.494	152.514	207.343	141.05	195.899	172.444	199.293	203.393	203.822	226.25	221.896	242.527	299.509	251.294	271.063	243.354	281.501	270.558	280.571	327.266	278.255	263.52	272.668	178.403	167.773	215.897	288.772	179.232	220.675	230.944	245.183	172.074	312.317	230.654
CLTA	uc003zzc.3	0.0272631	7.67819e-05	24	4	93.3934	0.76481	0.306247	24	1	54.4841	N	Y		2498.84	2547.04	2499.53	2630.37	2555.38	2536.77	2398.82	2527.03	2506.6	2513.8	2449.24	2470.76	2222.42	2336.73	2337.03	2491.7	2110.95	2329.25	2292.23	2442.62	2404.69	2346.9	2470.21	2544.25	2857.37	2942.29	2754.33	2883.65	2703.63	2815.82	2727.33	2536.89	2902.48	2854.01	2628.62
PRICKLE1	uc001rnm.3	0.0272631	7.67819e-05	24	18	32.5263	1	1	24	17.5	2.2357	N	N		136.943	71.3742	131.331	110.905	93.4226	94.2299	120.095	91.6746	113.155	112.682	113.125	154.226	166.094	149.754	161.546	145.957	195.249	156.199	197.908	151.838	199.205	163.018	160.249	154.969	78.9651	45.0734	76.3274	61.0082	80.7807	58.8467	81.3801	85.0635	63.2623	65.7511	78.9625
EXOSC2	uc004bzu.2	0.0321897	0.000103608	24	5	93.3922	0.349865	0.0947331	24	6.5	45.7168	N	N		759.813	725.978	823.997	853.483	776.69	766.238	723.648	793.185	747.684	790.431	723.64	772.701	611.461	658.354	633.619	729.786	602.725	619.646	581.199	640.362	684.768	623.965	620.816	668.919	719.46	713.662	700.031	797.173	747.222	747.353	758.814	730.545	840.124	622.58	606.764
KIF3C	uc002rgu.2	0.0383468	0.000138924	24	17	26.3736	1	1	24	17.5	1.09491	N	N		166.393	167.22	124.976	103.672	139.218	133.906	96.9997	132.862	187.637	145.824	190.337	138.488	151.395	186.487	193.855	205.532	229.205	187.095	207.929	179.895	174.304	179.882	174.493	192.241	163.78	162.765	196.27	197.26	212.049	241.272	149.563	160.119	172.074	176.706	218.186
CRY2	uc010rgn.2	0.0383468	0.000138924	24	9	18.2312	0.636471	0.232515	24	6.5	20.6315	N	N	CAY	58.9002	61.1779	148.277	110.905	115.404	121.507	218.634	116.918	158.99	127.596	147.242	118.03	120.528	138.452	109.492	93.8297	101.869	101.272	70.1447	95.7242	92.4881	73.077	66.4736	107.89	368.504	400.652	322.756	337.579	325.647	403.1	365.111	345.258	361.861	365.74	384.423
CDC20	uc001ciy.3	0.0383468	0.000185139	24	6	655.166	0.00691322	0.000103608	24	10.5	426.17	Y	N		4034.67	4300.81	4884.67	3749.06	5718.93	4490.8	5431.98	4676.73	4673.74	4489.05	5225.29	4615.75	3621.73	4447.42	3379.9	3881.27	3647.48	3698.99	3802.84	3408.11	3985.88	3562.5	3913.63	3519.18	2202.25	2296.24	2431.57	2430.16	2872.76	2833.47	3074.85	3079.8	2689.91	2960.85	2732.52
HEG1	uc011bke.2	0.0383468	0.000185139	24	16	356.841	0.429583	0.129367	24	4	84.2489	N	N		1256.05	1186.85	1230.7	1176.55	1302.42	1133.24	1539.68	1217.01	1582.74	1292.53	1619.66	1270	1818.21	1333.66	1911.63	1340.42	1822.32	1613.48	1823.76	1657.02	1808.85	1623.15	1609.61	1728.2	1117.21	1124.33	1127.46	1073.74	1085.49	1150.45	987.559	1090.81	850.246	1082.84	966.251
SEMA3C	uc011kgw.2	0.0383468	0.000185139	24	18	221.285	0.386928	0.110879	24	13	37.192	N	N		533.047	422.127	618.527	419.509	492.759	488.508	638.966	480.96	668.905	546.839	729.027	593.296	840.759	607.494	859.783	801.276	840.419	825.622	936.933	970.445	1129.42	926.111	807.18	906.277	1216.65	1199.45	1251.77	1260.84	1383.37	1377.01	1343.87	1408.55	1295.61	1444.47	1354.83
SDC2	uc003yhv.1	0.0383468	0.000185139	24	17	133.672	1	1	24	15.5	9.87255	N	N		671.463	605.661	699.02	564.167	564.2	612.495	643.585	593.892	670.337	681.063	642.837	643.655	852.517	723.342	933.376	689.574	993.223	794.726	889.334	742.688	885.751	810.874	873.653	829.773	315.861	232.879	296.586	250.134	300.403	282.464	270.534	292.718	225.214	281.497	276.369
GPC4	uc004exc.1	0.0383468	0.000185139	24	19	60.2432	1	1	24	11.5	0.391104	N	Y		503.597	369.107	502.024	424.331	439.636	354.602	449.586	338.797	446.891	354.617	479.434	421.76	480.643	443.612	577.975	454.255	574.428	526.956	633.807	524.833	707.89	487.648	624.377	513.949	157.93	180.293	200.632	189.125	199.427	197.136	191.353	185.138	156.891	174.651	141.301
PER2	uc002vyc.3	0.0383468	0.000185139	24	9	35.2299	1	0.580561	24	17.5	14.1896	N	N	CAY	20.6151	63.2171	118.622	118.137	86.0954	106.629	218.634	140.833	166.152	120.967	199.315	132.193	146.986	138.452	73.5931	84.8935	107.528	89.2564	45.093	79.22	71.1447	80.1036	47.4811	76.5039	152.081	202.83	159.197	229.797	201.952	191.252	204.55	157.618	275.824	207.527	224.42
EMP3	uc002piv.2	0.041328	0.000245257	24	8	312.108	1	0.825244	24	2	46.4445	N	N		2238.21	2897.79	2166.96	2594.2	2872.29	2725.23	2546.63	2780.8	2933.44	2614.88	2898.15	2455.02	2247.41	2814.25	2197.02	2333.83	2277.9	2518.06	1933.99	2064.67	1876.44	2154.37	1946.73	2173.5	3281.44	3811.2	3168.68	3550.68	3049.47	3813.27	2995.67	3122.33	3183.36	3462.2	2979.79
RUVBL2	uc002plr.1	0.041328	0.000245257	24	6	185.763	1	1	24	6.5	14.2386	N	N		2464.97	2683.67	2554.6	2746.09	3009.67	2675.63	2629.77	2666.54	2774.45	2654.65	2865.83	2593.51	2432.61	2543	2356.77	2403.83	2515.6	2272.61	2409.97	2379.9	2217.94	2462.13	2454.78	2391.24	2567.83	2867.17	2743.42	2607.08	2807.13	2709.89	2687.74	2611.95	2960.68	2667.03	2786.54
SCD	uc001kqy.3	0.041328	0.000245257	24	15.5	124.072	0.20269	0.0410599	24	2.5	55.9035	N	N		748.033	823.862	908.726	778.743	996.508	1048.93	996.171	1044.29	1092.88	1078.76	1131.25	1192.89	1224.39	1483.42	1134.41	1169.15	1256.38	1338.85	1222.52	1254.32	1150.77	1212.8	1187.03	1259.37	1728.46	1960.69	1559.26	1736.7	1671.15	1718.32	1612.21	1556.16	1546.13	1573.92	1556.39
KCNN4	uc002oxl.3	0.041328	0.000245257	24	5.5	118.148	0.636471	0.232515	24	19	20.267	N	N		600.782	721.899	633.355	704.003	729.063	662.089	620.49	676.266	613.043	593.237	588.968	591.722	505.631	624.447	507.972	552.552	571.598	473.746	486.002	440.661	489.12	452.515	487.869	413.906	772.104	823.841	684.766	913.089	656.343	903.297	750.017	888.163	657.928	1023.25	750.143
AGO1	uc001bzl.3	0.041328	0.000245257	24	8.5	56.9949	0.180872	0.0343842	24	1	44.3828	Y	N		616.98	725.978	735.03	860.716	688.763	766.238	812.95	833.043	847.948	813.63	808.035	791.586	781.964	788.33	725.161	713.403	761.188	751.814	588.714	742.688	679.432	677.368	724.088	637.533	1038.25	1016.65	1066.4	917.156	1007.23	941.547	798.405	865.646	969.179	906.132	835.34
KIAA1432	uc003zji.4	0.041328	0.000245257	24	17	31.2345	1	0.580561	24	5	6.92303	N	N		375.489	369.107	404.584	378.522	362.7	352.122	380.3	362.713	396.759	409.301	368.105	380.843	392.452	446.438	445.149	417.021	435.773	413.669	501.033	422.507	398.41	448.299	407.151	413.906	233.971	262.928	344.564	244.033	287.781	297.176	307.925	260.194	265.702	260.949	313.772
SOX6	uc001mme.3	0.041328	0.000245257	24	17	13.7806	0.349865	0.0947331	24	17	6.58678	N	N		58.9002	26.5104	48.7196	24.1097	34.8045	27.2771	49.2697	34.5441	38.6733	28.1705	50.2777	59.8017	67.6135	93.2433	68.2082	56.5957	82.0612	58.36	80.1654	67.6671	80.0378	60.4291	62.9125	60.8108	20.4724	22.5367	15.2655	46.7729	20.1952	32.3657	32.9919	37.528	32.8964	26.7114	33.2474
NUDT21	uc002eja.3	0.0439924	0.000323018	24	5.5	195.385	0.0154744	0.00055099	24	5.5	205.474	N	N		2472.34	2404.29	2586.37	2468.83	2575.53	2432.62	2545.09	2479.2	2472.23	2515.46	2427.7	2275.61	2376.76	2136.12	2231.13	2234.04	2091.14	2291.49	2239.62	2190.1	2134.34	2240.09	2101.04	2136.23	2167.15	2078.38	2239.66	2293.91	2282.06	2347.98	2201.66	2121.58	2201.53	2149.24	1957.44
TRIP10	uc002mfs.3	0.0439924	0.000323018	24	6	132.163	0.226258	0.0488609	24	4	99.3373	N	N		1284.03	1429.52	1226.46	1374.25	1454.46	1477.92	1376.47	1357.85	1322.05	1383.67	1477.81	1359.7	1353.74	1263.02	1206.21	1224.25	1140.37	1100.26	1192.46	1229.56	1172.11	1162.21	1079.01	1196.6	1400.9	1364.72	1384.8	1386.92	1315.21	1385.84	1330.67	1341	1191.86	1358.17	1284.18
ERAL1	uc002hcy.1	0.0439924	0.000323018	24	6.5	55.0788	1	1	24	6.5	0	N	N		659.683	742.292	690.547	650.962	708.913	758.799	771.378	744.026	707.578	745.689	741.596	756.964	624.69	700.737	626.439	694.042	611.214	679.722	598.735	668.419	672.317	623.965	688.477	633.609	821.822	893.955	750.189	811.409	848.198	800.315	800.604	800.597	807.227	899.968	735.598
UPP1	uc003toj.3	0.0439924	0.000323018	24	7.5	39.7937	0.254232	0.0579452	24	1	45.8172	N	N		412.302	464.952	410.939	479.783	434.141	421.555	469.602	445.087	444.027	502.097	389.652	465.824	430.668	437.961	341.041	396.17	350.882	420.535	328.177	366.393	295.25	348.521	390.532	300.131	637.57	563.417	553.919	486.032	535.172	453.12	446.491	465.347	556.708	398.616	417.67
TMEM19	uc001sws.3	0.0439924	0.000323018	24	5	38.4035	0.0206922	0.000919932	24	10.5	32.893	Y	N		267.996	248.79	307.145	373.7	305.913	260.372	277.142	276.352	234.904	251.877	247.797	272.255	261.635	254.3	202.83	211.489	195.249	214.559	212.939	181.546	249.006	222.042	175.68	227.55	172.553	222.863	187.547	183.025	214.574	220.675	274.933	222.666	174.604	228.074	245.199
PQLC3	uc002rbc.3	0.0439924	0.000323018	24	18	31.2562	1	1	24	12.5	3.66313	N	N		139.888	89.7276	131.331	115.727	82.4317	81.8313	158.587	91.6746	114.588	96.111	138.264	107.014	142.576	146.929	145.391	165.319	147.144	161.348	160.331	181.546	195.648	146.154	195.86	125.545	114.061	197.822	102.497	103.714	133.793	158.886	114.372	130.097	101.22	125.338	126.756
C3orf37	uc003elv.3	0.0439924	0.000323018	24	9	29.0072	1	1	24	13.5	7.68739	N	Y		902.646	883.001	959.564	870.36	908.581	917.502	982.314	916.746	986.885	980.996	910.386	937.943	1043.6	878.747	874.143	898.084	880.035	959.507	859.272	879.672	859.072	862.871	821.424	847.428	804.275	718.67	811.251	738.199	764.893	741.469	831.397	753.062	713.599	688.331	743.91
PLK1	uc002dlz.1	0.0477936	0.000423037	24	6	375.938	0.0462294	0.00380362	24	9	261.362	N	N		2170.47	2008.67	2690.17	1926.36	3123.25	2375.59	2792.97	2521.72	2283.16	2394.49	2537.23	2308.66	1727.08	2410.2	1777	1946.59	1590.29	1929.31	1926.47	1757.69	1928.02	1856.44	2071.37	1702.7	1207.87	1166.9	1323.73	1279.14	1557.55	1662.42	1658.39	1668.75	1346.22	1534.88	1392.23
MCAM	uc001pwf.3	0.0477936	0.000423037	24	5.5	193.701	0.226258	0.0488609	24	22	114.841	N	N		2410.49	2795.83	2154.25	2512.23	2507.76	2673.15	2311.06	2515.07	2379.12	2482.32	2337.91	2396.79	2288.57	2353.69	1967.27	2211.7	2190.18	2118.12	2094.32	2099.33	2064.97	2292.09	2139.03	2281.39	1798.65	1858.02	1605.06	1982.77	1721.64	1606.52	1574.81	1818.86	1748.57	1857.47	1695.62
UBAP2	uc003ztq.1	0.0477936	0.000423037	24	5	113.447	1	0.580561	24	6	36.0117	N	Y		1286.97	1095.08	1086.66	1171.73	1344.55	1108.44	1205.57	996.463	1132.98	1062.19	1136.64	1030.79	974.516	1082.19	1028.51	887.658	894.184	913.162	1029.62	838.412	948.003	983.729	989.982	912.162	909.562	881.435	911.567	807.341	971.893	932.72	890.782	985.736	916.038	928.734	939.238
PLEKHB2	uc002tsh.2	0.0477936	0.000423037	24	6	103.268	0.315173	0.0806795	24	3	98.3103	N	N		942.404	956.414	1052.77	1210.31	928.731	962.137	1039.28	957.933	847.948	922.997	940.912	931.648	864.276	810.934	755.676	907.02	829.101	811.89	651.343	744.338	789.706	861.466	753.763	802.31	1014.85	1099.29	1090.39	1167.29	1067.82	965.086	1038.15	970.724	1007.14	953.39	866.509
TM7SF3	uc010sjl.2	0.0477936	0.000423037	24	16	69.2661	0.20269	0.0410599	24	14	73.451	N	N		519.795	536.326	603.699	513.536	479.936	585.217	565.062	591.235	565.776	584.952	624.88	572.838	698.182	548.157	651.568	683.616	707.424	702.036	641.323	739.387	706.111	659.098	616.068	570.837	1117.21	1124.33	1070.76	1138.82	1204.14	1318.17	1057.94	1341	1148.84	1199.96	1307.04
PRMT7	uc002evy.2	0.0477936	0.000423037	24	5	45.4548	0.636471	0.232515	24	4	35.8669	N	Y		412.302	354.832	368.574	433.974	463.45	424.035	372.602	387.956	385.301	343.017	402.222	363.532	305.73	401.229	328.477	288.936	333.904	320.98	318.156	303.677	323.708	354.142	332.368	319.747	371.429	375.611	423.072	370.116	381.184	347.196	327.72	317.737	349.208	386.287	415.592
CDKL1	uc001wxz.3	0.0477936	0.000423037	24	4	10.7022	1	0.923131	24	12	2.11384	N	N		89.8229	55.0601	93.2027	72.3291	65.9454	57.0339	63.1268	69.0881	61.5908	62.9693	52.0733	58.228	55.8546	28.2555	39.489	55.1063	31.1266	49.7776	42.5878	52.8134	42.6868	44.9705	34.4238	58.8492	52.6434	47.5774	52.3388	65.0754	68.1587	64.7314	65.9839	50.0373	43.0184	49.3133	68.5727
ZNF438	uc009xlg.3	0.0477936	0.000423037	24	15.5	6.92424	1	0.825244	24	13.5	0.442946	N	Y	A	44.1752	59.1386	59.3108	36.1645	43.9636	49.5947	64.6665	45.173	48.6997	72.9118	70.0297	59.8017	91.1312	67.8133	77.183	71.4893	73.5721	89.2564	70.1447	69.3175	58.6944	67.4557	81.905	68.6574	67.2666	52.5856	41.4349	46.7729	65.6343	50.0197	52.7871	52.5392	58.2013	49.3133	56.1049
VCP	uc003zvy.2	0.0507217	0.00055099	24	5	1185.77	0.226258	0.0488609	24	3	272.894	N	N		12083.4	13106.3	11800.7	12720.3	12491.2	12453.2	11489.1	12372.1	11594.8	11324.5	11547.7	11801.4	11157.7	11305	9852.5	10619.1	10048.2	10849.8	9797.71	10618.8	9882	10406.4	9423.82	10129.9	11850.6	11320.9	11170	11906.8	11142.7	11592.8	10781.8	10585.4	11184.8	11387.3	10809.5
HAPLN1	uc003kin.3	0.0507217	0.00055099	24	17.5	570.414	0.20269	0.0410599	24	19	134.64	N	N		1812.65	1786.39	2323.71	1699.73	2108.42	1951.55	2200.2	2116.49	2783.05	2029.93	2643.17	2305.51	2789.79	2678.63	3130.4	2767.23	2931.56	2911.13	3389.49	2952.6	3324.24	2880.92	2992.5	2934.61	1009	896.459	1205.97	876.484	1274.82	950.374	1200.91	968.222	1196.92	949.281	1176.13
PSMB4	uc001eyc.1	0.0507217	0.00055099	24	6	318.419	1	1	24	6.5	22.2437	N	N		3983.13	4786.15	3995.01	4122.76	4495.28	4475.92	4123.26	4477.44	4106.53	3834.5	4076.09	3935.9	3861.32	4294.84	3496.57	3756.17	3672.94	3941.02	3204.11	3414.71	3354.47	3618.72	3195.48	3532.91	5012.82	5200.97	4843.52	5513.11	4877.14	5425.67	4854.21	4836.11	5334.28	4916.95	4644.24
LRRC59	uc002iqt.3	0.0507217	0.00055099	24	5	248.174	0.349865	0.0947331	24	1.5	163.709	N	N		3077.54	2899.83	2370.31	2758.15	2815.5	2526.85	2451.17	2646.61	2380.56	2329.86	2336.12	2651.73	2231.24	2345.21	2116.25	2177.44	2224.14	2145.59	1941.5	2171.95	1876.44	2311.76	2077.3	2332.39	2822.27	3250.29	2680.18	2954.83	2557.22	2677.53	2568.97	2784.58	2872.11	2488.27	2520.57
SREBF2	uc003bbi.3	0.0507217	0.00055099	24	17	195.32	1	1	24	13.5	15.1931	N	N		907.064	960.493	912.963	1036.72	972.695	1145.64	1122.42	1181.14	1332.08	1176.53	1195.89	1191.31	1140.61	1398.65	1306.73	1352.34	1420.51	1589.45	1440.47	1508.48	1328.63	1441.87	1305.73	1447.69	979.753	1352.2	1070.76	1161.19	1135.98	1271.09	1154.72	1163.37	1184.27	1162.97	1491.98
GLG1	uc002fcx.3	0.0507217	0.00055099	24	17	158.723	1	0.825244	24	12.5	85.1211	N	N		3903.61	4064.25	4060.67	4414.48	3859.64	4205.63	4149.43	4155.92	4196.77	4160.95	4311.31	4200.28	4403.69	4334.4	4530.46	4310.21	4374.71	4548.65	4409.09	4570.01	4505.24	4263.76	4336.22	4366.61	4465.92	4377.12	4536.03	4486.13	4508.57	4234.02	4385.73	4696	4048.79	4526.55	4615.15
PDIA4	uc003wff.2	0.0507217	0.00055099	24	18	119.487	1	1	24	16.5	11.9486	N	N		1566.75	1729.29	1847.11	1745.54	1670.62	1844.92	1799.88	1858.74	1859.18	1786.34	1835.14	1866.44	1907.88	1966.59	1859.57	2028.51	1955.32	1931.03	2031.69	2181.85	2066.75	2044.75	1917.05	1993.03	1696.29	1705.28	1853.66	1813.98	1832.71	1530.01	1779.36	1691.26	1768.81	1725.97	1878.48
RPTOR	uc002jyt.1	0.0507217	0.00055099	24	5	71.766	0.475066	0.150471	24	3	50.7416	N	N		628.76	640.329	523.206	629.263	644.799	632.332	503.475	551.376	568.641	487.184	606.924	509.888	493.872	579.239	443.354	488.51	478.218	432.55	423.373	447.263	471.334	503.107	449.884	466.87	658.043	666.084	599.715	614.149	605.855	644.372	558.663	670.5	455.489	622.58	492.476
HTRA1	uc001lgj.2	0.0507217	0.00055099	24	20	57.7913	0.475066	0.150471	24	15	21.0821	N	N		125.163	169.259	190.642	154.302	119.068	181.021	172.444	138.176	130.343	152.452	163.403	191.995	148.456	313.636	204.625	294.893	226.376	247.172	293.105	297.075	330.823	327.441	259.959	317.786	116.985	162.765	119.943	132.184	146.415	123.578	120.97	152.614	146.769	172.597	176.627
SESN3	uc001pfj.4	0.0507217	0.00055099	24	16.5	54.0125	0.349865	0.0947331	24	16	70.3163	N	N		187.008	165.18	332.564	183.234	183.182	168.622	306.396	221.879	309.386	217.078	310.644	256.518	333.658	341.892	380.53	396.17	359.371	339.861	328.177	419.206	499.791	328.847	376.288	339.364	166.704	132.716	196.27	140.319	166.61	173.598	182.555	167.625	204.97	244.512	261.823
SSH1	uc001tnm.3	0.0507217	0.00055099	24	19	43.8475	0.579956	0.201719	24	22.5	14.0618	N	N		172.283	228.397	171.578	241.097	205.163	218.217	173.984	211.25	183.34	222.05	195.724	198.29	252.816	288.207	272.833	238.298	260.332	247.172	313.146	311.929	268.571	285.281	282.513	292.284	157.93	185.302	172.282	136.252	156.513	167.713	167.159	157.618	144.238	174.651	178.705
NEK9	uc001xrl.3	0.0507217	0.00055099	24	16	23.3674	0.76481	0.306247	24	18	18.3921	N	N		247.381	220.24	285.963	253.152	230.809	267.811	297.158	285.653	305.089	306.561	283.71	314.746	327.778	330.59	272.833	312.766	348.053	331.279	310.641	349.888	288.136	319.009	314.563	309.939	418.223	395.644	394.722	414.856	393.806	388.388	391.504	437.827	364.391	390.397	398.968
AVPI1	uc001koi.2	0.0507217	0.00055099	24	6	22.5191	1	1	24	14.5	1.57822	N	N	CA	92.7679	134.591	86.848	144.658	166.695	109.108	130.873	126.219	101.696	102.739	113.125	105.44	82.312	98.8944	73.5931	77.4467	70.7424	84.107	60.124	80.8704	83.595	80.1036	53.4163	60.8108	84.8144	112.683	85.0505	73.2098	70.6831	79.4431	83.5796	75.056	86.0368	76.0247	76.8845
VIM	uc001iou.2	0.0558795	0.00071381	24	5.5	5365.53	1	1	24	9.5	696.792	N	N		58875.2	60019.6	51827.1	59001.2	60303.4	56716.5	53186.6	56310.8	55980.3	52392.1	54073.7	54309.4	53047.2	53742	48390.2	48441.4	50057.3	49935.5	46591.1	47035.2	47088.9	48670.7	47921.5	49700.1	61949.6	64084.3	58512.6	72042.5	56955.5	59049.7	55254.9	59269.2	56290.8	63229.9	54122.5
AHNAK2	uc010axc.1	0.0558795	0.00071381	24	17	228.161	0.636471	0.232515	24	17	86.2644	N	N		1463.67	1582.47	1506.07	1682.86	1476.44	1532.48	1681.33	1589.03	1933.66	1721.71	1716.62	1808.22	1929.92	1963.76	1970.86	1809.57	2133.59	1920.73	2096.82	1861.67	2102.33	2004	2063.06	2010.68	3342.86	3355.46	3116.34	3377.82	2814.7	2862.89	3088.05	3420.05	2550.74	3474.53	3449.41
CNIH	uc001xat.1	0.0558795	0.00071381	24	6	151.629	0.282531	0.0684872	24	2	40.6277	N	Y		1459.25	1458.07	1546.32	1776.88	1569.87	1477.92	1461.15	1553.15	1588.47	1438.35	1560.4	1425.8	1361.09	1446.68	1317.5	1307.66	1386.55	1474.45	1114.8	1298.88	1280.6	1269.01	1080.2	1345.68	1772.33	1650.19	1757.71	1724.5	1663.58	1838.96	1590.21	1556.16	1680.25	1493.78	1491.98
USP5	uc001qri.4	0.0558795	0.00071381	24	5	135.524	1	1	24	8.5	48.4715	N	Y		2400.18	2443.04	2387.26	2671.35	2502.26	2526.85	2414.21	2476.54	2712.86	2329.86	2635.99	2409.38	2287.1	2543	2204.2	2312.98	2204.33	2154.17	2324.8	2105.93	2340.66	2251.33	2320.64	2212.73	2757.93	3009.9	2599.49	2916.19	2759.17	2992.36	2586.57	2719.53	2641.83	2930.03	2809.4
PCBP2	uc001sdc.4	0.0558795	0.00071381	24	6	116.214	1	1	24	6.5	41.6623	N	Y		2657.87	2657.16	2677.46	2782.26	2973.04	2635.96	2659.02	2610.73	2909.09	2570.14	2754.5	2681.64	2584.01	2661.67	2557.81	2377.02	2580.68	2483.73	2369.89	2336.99	2506.07	2550.67	2432.22	2483.44	2178.85	2426.45	2313.81	2566.41	2564.79	2480.39	2265.45	2259.19	2376.13	2297.18	2104.97
SYNE1	uc003qou.4	0.0558795	0.00071381	24	4	60.7825	0.429583	0.129367	24	4	82.6903	N	N		846.691	646.446	764.686	740.168	664.949	595.136	623.569	587.249	517.076	541.867	563.829	574.411	585.003	423.833	531.306	512.34	500.856	482.328	503.539	498.426	512.242	477.811	509.235	543.374	1196.18	966.573	1070.76	1372.68	1050.15	968.028	1104.13	1075.8	789.514	1308.86	989.109
RABL5	uc003uyl.3	0.0558795	0.00071381	24	5	50.8774	0.20269	0.0410599	24	7.5	18.0807	N	N		304.809	244.712	294.436	236.275	316.904	292.609	281.761	284.324	285.037	293.304	262.162	278.55	239.587	288.207	197.445	192.127	206.568	224.858	217.95	239.311	238.335	217.826	239.78	205.972	286.614	250.408	242.067	268.436	280.208	303.061	294.728	250.187	273.293	267.114	259.745
GNAI1	uc003uhb.1	0.0558795	0.00071381	24	17	20.2726	1	1	24	13.5	9.21582	N	N		357.819	293.654	400.348	356.823	289.427	302.528	329.491	332.154	315.116	344.674	321.418	376.121	373.344	324.939	366.171	369.361	393.328	405.087	403.332	376.295	361.059	363.98	352.548	364.865	312.936	212.846	263.875	278.604	287.781	197.136	228.744	195.146	263.171	258.895	224.42
SZT2	uc001cjk.3	0.0558795	0.00071381	24	16	18.2606	1	1	24	16.5	2.36198	N	N		181.118	226.358	156.75	161.535	179.518	185.98	198.618	199.293	187.637	187.251	204.702	207.732	173.443	200.614	211.805	220.425	254.673	243.739	237.991	234.359	224.106	199.556	197.047	180.471	274.916	267.936	268.236	246.066	222.147	285.407	233.143	227.67	189.787	273.278	209.874
GMCL1	uc002sfu.3	0.0558795	0.00071381	24	18	10.1166	1	1	24	14.5	0	N	N		70.6803	73.4135	84.7297	40.9865	64.1136	69.4326	56.9681	74.4026	77.3466	79.5402	61.0515	69.2441	74.9627	79.1155	96.9275	93.8297	87.7206	82.3906	85.1757	90.773	94.2667	84.3196	81.905	84.3505	35.0956	62.6019	58.8811	50.8401	58.0612	52.962	61.5849	35.0261	35.4269	32.8755	56.1049
SRRM2	uc002crk.3	0.0609731	0.000919932	24	8	368.373	0.00169817	3.75778e-06	24	14	330.968	Y	Y		4351.25	4771.88	4003.48	4973.83	4641.82	4773.49	4866.92	4594.36	4991.72	4552.02	4785.36	4651.94	4369.89	4354.18	4167.88	4040.63	4168.14	4316.92	4073.4	4041.87	3937.86	4171.01	4124.92	3984.09	3351.63	3473.15	3090.17	3536.44	3511.44	3627.9	3800.67	3830.36	4473.91	4066.29	4174.62
SF3B2	uc001ogy.1	0.0609731	0.000919932	24	4	213.855	0.254232	0.0579452	24	8	169.716	N	Y		4327.69	4329.36	4215.3	4277.06	4394.53	4180.83	4101.7	4246.26	4208.23	4252.09	3964.76	4277.4	4064.16	3890.79	3807.1	3943.82	3919.13	3709.29	3715.16	3974.2	3868.49	4116.2	3786.62	4023.32	4287.52	4289.48	4158.75	4187.19	4362.16	4063.37	4222.97	4110.57	4486.56	4353.95	4039.55
COL11A1	uc001dum.3	0.0609731	0.000919932	24	17.5	67.3905	0.20269	0.0410599	24	18	24.1368	N	N		151.668	146.827	190.642	122.959	135.554	176.061	232.491	146.148	197.664	187.251	237.024	199.864	271.924	282.555	251.294	281.489	251.843	207.693	325.672	382.897	423.311	293.713	294.383	258.936	462.092	408.164	486.314	445.36	464.489	397.215	395.903	387.789	478.263	412.999	490.398
SEC24D	uc003icj.4	0.0609731	0.000919932	24	19	35.859	0.386928	0.110879	24	19.5	21.8067	N	N	A	294.501	379.303	410.939	385.755	324.232	369.48	371.062	373.342	345.195	356.274	378.879	360.384	489.463	372.973	477.458	403.617	444.262	480.612	463.456	450.564	583.386	420.193	427.33	408.021	476.716	488.295	338.021	471.797	449.343	441.35	420.097	402.801	399.818	437.655	525.724
TCP11L2	uc001tln.3	0.0609731	0.000919932	24	19	32.6719	0.282531	0.0684872	24	12.5	10.8347	N	N		73.6253	44.8638	99.5574	79.562	69.609	49.5947	98.5394	41.1871	94.5347	39.7701	75.4166	70.8178	146.986	93.2433	134.622	96.8084	144.314	104.705	160.331	130.383	202.762	115.237	129.386	121.622	64.342	37.5611	61.0619	56.941	65.6343	61.789	72.5823	62.5467	60.7318	73.9699	99.7421
CREB3L2	uc003vtw.3	0.0609731	0.000919932	24	18.5	28.427	1	1	24	11.5	5.77815	N	N		284.194	316.086	336.801	253.152	232.641	319.886	323.332	279.01	336.601	281.705	348.353	339.926	360.115	254.3	346.426	364.893	350.882	362.175	368.26	354.84	460.662	411.761	350.173	368.788	271.991	300.489	218.078	258.268	249.915	250.099	206.749	232.674	172.074	219.855	238.965
ELL2	uc003klr.4	0.0609731	0.000919932	24	18	19.0341	0.254232	0.0579452	24	17	14.6207	N	N		163.448	191.691	192.76	156.713	146.545	176.061	157.047	123.561	123.182	144.167	172.381	157.373	198.431	132.801	215.394	168.298	220.716	219.708	235.486	227.758	165.411	182.693	189.925	166.739	169.629	152.749	185.366	154.554	153.988	123.578	156.162	145.108	240.397	182.87	178.705
CLIC1	uc003nwr.3	0.0681812	0.00117956	24	6	446.677	0.0592317	0.00588624	24	1	317.068	Y	N		4732.63	4810.62	4355.11	4860.51	4945.9	5138.01	4332.65	4876.03	4597.83	4631.56	4760.22	4601.59	4161.17	4585.87	3972.23	4462.12	4128.53	4414.76	4033.32	4083.13	3751.1	4069.83	3976.55	4201.83	6934.31	7356.97	6439.85	7323.01	6598.78	7246.97	6228.88	6584.91	6807.03	6355.25	6044.78
PLCE1	uc001kjk.3	0.0681812	0.00117956	24	21.5	100.339	0.429583	0.129367	24	9	39.7692	N	N		799.571	703.546	790.105	781.154	705.249	652.17	648.204	624.45	650.284	623.065	549.464	563.395	733.459	534.03	838.243	671.701	786.655	911.446	831.716	813.656	706.111	786.983	852.287	804.272	315.861	320.522	455.783	384.351	419.05	394.273	413.499	435.325	291.007	425.327	409.358
NCLN	uc002lxi.3	0.0681812	0.00117956	24	6.5	98.1562	0.100909	0.0134079	24	2.5	46.0226	Y	Y		624.342	897.276	580.399	696.77	811.495	743.92	717.49	811.785	747.684	715.862	689.523	684.572	577.654	940.909	538.486	644.893	565.939	617.929	496.023	551.239	526.471	650.666	496.178	584.568	982.677	1016.65	813.432	937.492	785.088	779.719	785.208	825.616	784.453	749.973	785.469
PLAC8	uc003hoe.3	0.0681812	0.00117956	24	17	97.1775	1	0.45321	24	15.5	13.017	N	N		368.126	391.538	451.186	515.947	373.691	446.352	463.443	441.101	517.076	553.467	463.273	470.545	507.101	576.413	556.436	542.127	534.812	686.588	618.776	661.817	576.272	614.128	608.946	627.725	84.8144	70.1141	119.943	69.1426	98.4515	100.039	83.5796	100.075	70.8538	90.4077	128.834
TSC22D1	uc001uzn.4	0.0681812	0.00117956	24	17	45.9652	0.840422	0.349965	24	15	16.0851	N	N		316.589	242.672	281.726	400.221	265.613	238.055	294.078	293.624	330.872	313.189	328.601	343.073	365.995	387.101	421.814	376.808	325.415	381.056	388.301	396.1	380.624	379.438	386.971	374.673	330.484	308.001	342.383	278.604	272.635	370.734	332.119	342.756	306.19	398.616	351.175
EXPH5	uc001pkk.3	0.0681812	0.00117956	24	5.5	35.2598	1	1	24	9.5	5.94449	N	N		244.436	208.005	269.017	219.398	196.004	290.129	221.714	233.837	197.664	231.992	197.52	193.569	194.021	169.533	186.675	180.213	155.633	181.946	207.929	150.188	160.076	157.397	176.867	131.43	96.513	90.1467	113.401	101.68	143.891	79.4431	158.361	160.119	70.8538	88.353	83.1184
PROS1	uc003drb.4	0.0681812	0.00117956	24	17	24.4057	1	1	24	15.5	7.50344	N	N		285.666	283.458	279.608	296.549	239.968	225.656	311.015	308.239	285.037	291.647	299.871	294.287	329.248	262.777	296.167	372.34	382.009	369.041	313.146	320.181	353.945	337.279	314.563	307.977	500.113	438.213	449.241	416.889	434.196	476.658	475.084	495.37	468.141	486.969	463.385
RTCA	uc001dtd.3	0.0681812	0.00117956	24	3	16.1018	1	1	24	5.5	4.70926	N	N		446.169	379.303	436.358	378.522	370.027	394.278	358.745	353.412	335.169	314.847	316.031	343.073	302.791	197.789	312.322	305.319	305.607	307.248	315.651	315.23	307.701	293.713	302.692	306.016	561.53	488.295	521.207	577.544	434.196	547.274	435.494	465.347	490.916	534.227	440.527
LOXL4	uc001kpa.1	0.0751878	0.00150497	24	17	462.144	0.254232	0.0579452	24	17.5	253.246	N	N		699.44	995.16	936.263	1174.14	921.404	1135.72	1239.44	1120.02	1483.91	1327.33	1538.86	1288.88	1477.21	1862.04	1820.08	1417.87	1663.86	1594.6	2006.64	1924.39	2132.56	1794.6	1963.35	1765.48	503.037	573.433	590.992	429.091	608.38	638.487	695.03	662.995	549.117	739.699	1018.2
AIMP2	uc003spo.3	0.0751878	0.00150497	24	6	217.124	0.429583	0.129367	24	11.5	48.1523	N	N	A	2143.97	2108.6	2207.21	2042.09	2264.13	2162.33	2023.14	2198.86	2029.63	2159.18	1991.36	2171.75	1846.14	2023.1	1699.82	1921.27	1938.34	1941.33	1796.2	1883.13	1778.62	1819.9	1782.92	1736.05	1757.71	1822.97	1873.29	1659.42	1794.85	1762.46	1862.94	1843.88	1958.6	1845.14	1845.23
MAP1A	uc001zrt.3	0.0751878	0.00150497	24	5	170.272	0.579956	0.201719	24	3	81.1074	N	N		1764.06	1710.94	1366.27	1441.76	1452.63	1589.51	1267.15	1482.74	1353.57	1317.38	1301.83	1284.16	1171.48	1271.5	1143.39	1344.89	1134.71	1263.32	1024.61	1094.23	944.446	1188.91	938.94	1194.64	1424.3	1382.25	1114.38	1431.66	1100.64	1088.66	1143.72	1210.9	969.179	1337.62	1014.04
CDC42EP3	uc002rqi.2	0.0751878	0.00150497	24	17	165.621	1	1	24	13.5	15.8187	N	N		550.717	534.287	444.831	441.207	582.518	456.271	555.824	511.518	837.921	618.093	630.267	599.591	614.401	743.121	800.549	768.51	676.297	911.446	829.21	873.071	704.332	895.193	777.504	965.126	383.127	440.717	388.179	398.587	391.282	488.428	486.081	410.306	387.165	408.889	513.256
NSFL1C	uc031rsc.1	0.0751878	0.00150497	24	5	141.556	0.226258	0.0488609	24	8	52.0319	N	N		1198.62	1488.66	1279.42	1680.45	1326.24	1296.9	1134.74	1300.72	1108.63	1239.5	1206.67	1246.39	1111.21	1133.05	926.196	1172.13	1018.69	1067.64	881.819	1109.08	983.575	1150.96	919.947	1088.71	1240.05	1257.05	1188.53	1291.34	1289.97	1371.13	1178.91	1218.41	1323.45	1255.43	1157.42
ZNF608	uc003ktq.1	0.0751878	0.00150497	24	16	122.646	0.315173	0.0806795	24	16	65.0288	N	N		510.959	395.617	557.098	352.001	503.75	456.271	577.379	502.217	628.799	540.21	615.902	602.738	780.494	712.04	730.546	679.148	758.358	686.588	759.066	673.37	775.477	715.311	766.821	747.385	233.971	310.505	303.129	274.537	350.891	270.695	367.31	285.213	291.007	304.099	401.046
PNPO	uc002imo.3	0.0751878	0.00150497	24	5	89.5367	0.840422	0.349965	24	20.5	33.8508	N	N	A	664.1	607.7	544.388	609.975	648.463	545.542	597.395	535.433	621.637	538.553	588.968	558.674	564.425	502.949	391.3	473.616	444.262	473.746	493.518	410.954	449.99	455.326	505.674	455.1	962.205	1056.72	911.567	941.559	893.637	1023.93	862.189	893.166	845.185	932.843	991.187
PRPF4	uc004bgx.3	0.0751878	0.00150497	24	8.5	49.6652	0.636471	0.232515	24	3.5	17.4895	N	N		502.124	428.245	495.669	515.947	474.441	468.67	514.252	425.158	529.967	518.668	517.142	470.545	508.571	392.752	421.814	460.212	438.603	386.206	410.847	402.702	401.967	418.787	384.597	358.98	500.113	478.278	538.653	451.46	469.538	544.332	431.095	512.883	538.995	464.367	430.138
ZNF140	uc001ulo.3	0.0751878	0.00150497	24	20	14.7531	1	0.580561	24	16	4.86962	N	Y		104.548	87.6883	82.6115	33.7536	67.7772	64.4731	84.6823	75.7312	64.4555	71.2547	71.8253	73.9653	83.7819	67.8133	75.3881	81.9148	90.5502	92.6894	102.712	84.1713	124.503	103.994	97.3364	80.4272	81.8898	47.5774	85.0505	69.1426	93.4027	82.3854	79.1806	75.056	83.5063	80.1341	95.5861
SCUBE3	uc003okf.1	0.0751878	0.00150497	24	17	13.6738	1	0.735861	24	0.5	10.1979	N	N		41.2302	42.8245	46.6013	36.1645	40.3	42.1555	60.0474	30.5582	51.5644	28.1705	50.2777	53.5068	60.2642	62.1622	62.8234	47.6595	73.5721	46.3447	67.6395	69.3175	74.7019	56.2131	53.4163	54.9259	55.5681	87.6427	52.3388	71.1762	55.5368	67.6737	43.9892	45.0336	48.0794	65.7511	72.7286
ATP6V0A4	uc003vug.3	0.0751878	0.00150497	24	3	10.0314	0.76481	0.306247	24	1	4.9089	N	N		58.9002	55.0601	48.7196	103.672	45.7954	54.5542	46.1903	46.5016	41.538	38.113	43.0952	33.0483	39.6862	28.2555	19.7445	23.8298	45.2751	36.0459	32.5672	28.0571	26.6793	35.1332	30.8627	31.3862	55.5681	102.667	69.785	85.4114	63.1099	82.3854	74.7817	67.5504	48.0794	92.4624	49.871
AATF	uc002hni.3	0.0855758	0.00191087	24	5.5	167.377	1	1	24	6.5	6.77844	N	N	CA	1765.53	1737.45	1906.42	1834.75	1826.32	2040.82	1705.96	1788.32	1738.87	1718.4	1763.31	1790.9	1725.61	1621.87	1529.3	1541.49	1604.44	1536.24	1503.1	1587.7	1534.95	1540.24	1451.74	1524.19	1827.9	1517.47	1659.58	1661.46	1726.69	1771.29	1746.37	1618.71	1877.63	1654.05	1577.17
ZNF281	uc001gve.3	0.0855758	0.00191087	24	18.5	110.365	1	1	24	14.5	11.8	N	N		1107.32	972.728	1154.44	892.059	941.554	952.218	982.314	1032.34	1122.96	1010.82	1007.35	1054.4	1180.3	1036.98	1118.26	1057.45	1086.6	1287.35	1199.98	1288.98	1312.62	1145.34	1191.78	1175.02	579.078	508.327	599.715	626.351	643.721	556.101	567.461	620.463	731.312	560.939	571.439
FADS1	uc010rlm.2	0.0855758	0.00191087	24	16.5	98.5709	1	1	24	12.5	16.348	N	N		852.581	950.297	944.736	928.223	1036.81	1101	1040.82	1029.68	1101.47	1055.56	1163.57	1065.41	1168.54	1138.7	1141.59	1160.21	1199.79	1266.75	1194.96	1081.02	1209.46	1195.93	1181.09	1180.91	1166.93	1254.54	1079.49	1100.18	1143.55	1385.84	1126.12	1188.39	1065.34	1286.25	1178.2
PHYH	uc001imf.3	0.0855758	0.00191087	24	17	47.403	1	1	24	17.5	6.06282	N	N		407.884	416.01	402.466	385.755	377.354	394.278	469.602	370.684	422.542	422.557	414.791	445.365	485.053	387.101	513.357	464.68	458.411	485.761	470.971	480.271	524.692	531.214	471.25	459.024	315.861	302.993	320.575	252.167	310.501	285.407	303.526	297.722	316.312	285.606	297.148
TMEM87B	uc002thm.2	0.0855758	0.00191087	24	17	46.8898	1	1	24	13.5	21.8111	N	N		322.479	252.869	326.209	253.152	228.977	257.892	249.428	253.766	264.984	301.59	267.549	300.582	302.791	372.973	333.861	291.915	387.668	332.995	313.146	356.49	345.052	299.335	267.081	321.709	687.289	616.003	634.608	705.661	565.465	509.024	523.472	570.426	594.666	673.948	635.856
TEF	uc011apa.3	0.0855758	0.00191087	24	7	40.2717	1	0.513638	24	16	2.92019	N	N	CAY	79.5153	69.3349	199.115	122.959	95.2545	188.46	220.174	175.378	163.287	183.937	136.468	162.094	105.83	149.754	62.8234	160.851	113.188	99.5553	65.1343	89.1225	104.938	85.725	92.5882	100.044	131.609	135.22	165.739	115.916	118.647	105.924	112.173	142.606	146.769	123.283	130.911
FAM104A	uc002jjj.4	0.0855758	0.00191087	24	5	38.4454	0.254232	0.0579452	24	16	31.427	N	N		413.774	454.756	455.422	503.893	516.572	401.717	483.459	450.401	435.433	415.929	432.747	442.218	393.922	463.391	393.095	394.68	379.179	326.129	415.858	387.848	375.288	423.003	381.036	386.443	383.127	438.213	381.637	390.452	381.184	467.831	400.302	415.31	470.672	404.78	500.788
SUSD5	uc003cfo.1	0.0855758	0.00191087	24	3	28.9568	0.226258	0.0488609	24	3	15.2554	N	N		265.051	240.633	252.071	253.152	243.632	200.859	212.475	219.222	237.769	231.992	188.541	201.437	191.081	152.58	163.341	229.361	178.271	187.095	185.382	189.798	147.625	191.124	185.176	237.358	353.881	277.952	305.309	339.612	247.391	223.618	263.935	262.696	245.458	283.551	265.979
TET1	uc001jok.4	0.0855758	0.00191087	24	17.5	25.1169	1	1	24	13.5	4.24004	N	N		63.3177	55.0601	116.503	55.4523	69.609	52.0744	66.2061	54.4733	68.7525	59.6551	70.0297	75.539	72.023	67.8133	114.877	98.2977	124.507	90.9729	105.217	102.326	99.6026	109.616	77.1569	113.775	55.5681	25.0408	34.8925	38.6385	37.866	11.7693	26.3935	35.0261	27.8354	51.368	18.7016
AFP	uc003hgz.1	0.0855758	0.00191087	24	5	19.254	1	1	24	10.5	1.59027	N	N		73.6253	104.002	88.9662	120.548	78.7681	106.629	63.1268	90.346	45.835	69.5977	53.869	83.4077	74.9627	48.0344	48.4638	61.0638	33.9563	48.0612	35.0723	47.8621	30.2365	44.9705	42.733	49.041	26.3217	57.5937	65.4235	85.4114	58.0612	100.039	52.7871	47.5355	55.6708	49.3133	62.3388
C9orf116	uc004cft.1	0.0855758	0.00191087	24	6	11.4403	1	0.735861	24	4	5.69868	N	Y		55.9552	61.1779	57.1926	53.0413	82.4317	57.0339	69.2855	63.7736	55.8614	61.3122	66.4384	39.3432	57.3244	42.3833	55.6436	44.6808	50.9345	42.9118	42.5878	46.2117	32.0151	43.5651	46.2941	45.1177	23.3971	55.0897	54.5195	61.0082	73.2075	73.5584	63.7844	45.0336	43.0184	43.1491	39.4812
ASIC1	uc001rvv.4	0.0855758	0.00191087	24	15	9.4838	1	1	24	9.5	3.58698	N	N		39.7577	38.746	38.1284	50.6304	29.3091	34.7163	69.2855	46.5016	54.4291	61.3122	73.6209	39.3432	77.9025	62.1622	75.3881	64.0425	79.2315	54.927	62.6292	59.415	60.473	57.6184	73.5958	43.1561	78.9651	85.1386	93.7736	61.0082	80.7807	73.5584	72.5823	92.5691	58.2013	78.0794	76.8845
HSPA8	uc001pyo.3	0.0937805	0.00241479	24	6	1571.18	0.429583	0.129367	24	18	443.854	N	N		11466.4	12237.6	11667.3	13159.1	10846.2	13269.1	11088.8	13288.8	10255.6	13112.5	10628.4	12836.9	10650.6	11452	8897.59	10948.3	9188.02	10712.5	8562.66	10445.5	8731.23	10176	8514.56	9445.29	11730.7	10950.3	10969.3	12348.1	11380	11769.3	11208.5	11193.4	14061.9	12153.7	12087.5
RPL18	uc002pjq.2	0.0937805	0.00241479	24	5	464.177	0.226258	0.0488609	24	21	254.366	N	Y		5789.89	6327.83	4802.06	6032.24	5938.75	5353.75	4999.33	5297.2	5147.85	4964.63	5126.53	5092.59	4588.9	4871.26	4338.4	4727.23	4685.98	4588.12	4293.86	4621.17	4188.64	4962.21	4485.78	4466.65	5603.6	6928.78	5530.46	6039.81	5558.72	5616.92	5533.85	5616.69	6594.46	5445.01	5433.86
PSMC4	uc002omq.4	0.0937805	0.00241479	24	5	284.795	0.315173	0.0806795	24	1	71.7214	N	N		2338.34	2483.82	2287.7	2533.93	2632.32	2412.78	2275.64	2453.96	2333.29	2227.13	2314.57	2240.99	1991.66	2362.16	1994.19	2101.49	1884.58	2161.04	1939	2044.87	1860.43	2019.46	1873.13	2020.49	2851.52	2947.3	2802.3	2781.97	2797.03	2665.76	2557.97	2479.35	2983.45	2728.67	2678.49
TUBA1A	uc009zlf.4	0.0937805	0.00241479	24	16.5	145.271	1	1	24	16.5	14.2997	N	N		335.731	342.596	425.767	349.591	315.072	384.359	451.126	457.044	448.324	485.527	558.442	478.414	629.099	531.204	662.338	588.297	656.489	629.945	653.849	607.354	763.027	673.152	788.187	670.881	938.808	946.541	1042.41	888.686	994.613	1015.11	961.165	893.166	926.16	883.53	1124.18
TIMM10	uc001nkm.1	0.0937805	0.00241479	24	5	91.9227	1	1	24	5.5	22.9119	N	N		786.318	842.216	864.243	1024.66	904.917	974.536	705.172	915.417	782.06	830.201	834.969	797.881	702.592	926.782	667.723	832.552	602.725	702.036	673.89	780.647	663.424	754.661	712.217	757.193	833.521	916.492	1000.98	951.727	987.04	959.201	912.777	905.676	1045.09	936.952	901.835
TMEM59	uc001cwq.3	0.0937805	0.00241479	24	16.5	89.8157	1	1	24	17.5	16.2583	N	N		1210.4	1123.63	1270.95	983.675	1034.98	1133.24	1293.33	1153.24	1207.47	1128.48	1222.83	1186.59	1287.6	1359.09	1373.14	1310.64	1273.36	1352.58	1302.69	1320.33	1483.37	1254.96	1283.18	1351.57	1503.26	1319.65	1467.67	1588.25	1496.97	1488.82	1405.46	1498.62	1505.64	1559.53	1410.93
DIS3L	uc010ujm.2	0.0937805	0.00241479	24	5.5	78.9896	1	0.654469	24	4.5	13.398	N	N		516.85	456.795	440.595	566.578	489.095	468.67	460.364	458.373	369.545	338.046	436.339	402.875	352.766	384.275	348.221	372.34	348.053	353.593	298.115	331.734	286.357	324.631	344.238	290.323	251.519	247.904	252.971	278.604	239.818	300.118	248.539	237.677	199.909	244.512	189.094
LAS1L	uc004dwa.2	0.0937805	0.00241479	24	4	57.3466	0.429583	0.129367	24	6	106.665	N	Y		1834.74	1662	1908.54	1907.08	1815.33	1676.3	1745.99	1735.17	1724.54	1698.51	1686.1	1738.97	1621.25	1695.33	1523.92	1642.76	1717.63	1467.58	1643.39	1661.97	1643.44	1682.18	1543.14	1671.32	2064.79	1960.69	2004.14	1803.81	2027.09	1880.15	1933.33	1796.34	1940.89	1894.45	1811.98
DUSP3	uc002ied.4	0.0937805	0.00241479	24	4.5	50.2263	0.840422	0.349965	24	0	48.1177	N	N		597.837	717.821	665.128	711.236	780.354	746.4	646.665	664.309	613.043	611.465	694.91	671.983	485.053	562.285	567.205	597.233	582.917	587.033	588.714	554.54	512.242	578.995	518.732	598.3	1038.25	1146.87	1020.61	1053.41	997.137	1232.84	985.359	1015.76	974.24	1029.41	1065.99
PPP4R1	uc002koe.2	0.0937805	0.00241479	24	4	44.1797	1	0.45321	24	7	34.6041	N	N		964.491	964.571	1101.49	947.511	994.676	967.097	866.838	947.304	862.271	957.796	888.838	941.09	889.264	884.398	820.294	918.935	752.699	883.982	811.674	879.672	835.95	921.895	832.107	837.62	927.109	974.085	983.533	1000.53	944.125	970.971	917.176	953.211	1088.11	986.266	924.692
GNPDA1	uc003lmf.4	0.0937805	0.00241479	24	8	43.4143	0.0519784	0.00474194	24	4	29.9895	Y	N	A	295.974	352.792	370.693	523.18	346.213	322.366	377.221	414.529	421.109	357.931	395.039	404.449	301.321	358.845	324.887	318.723	308.437	355.309	288.094	344.937	289.915	311.983	303.879	315.824	763.33	873.922	697.85	683.292	785.088	726.757	688.432	735.549	741.434	696.55	679.493
NFIL3	uc004arh.3	0.0937805	0.00241479	24	16	40.9733	1	1	24	14.5	4.49399	N	N		210.568	203.926	194.878	188.056	206.995	185.98	172.444	205.936	249.228	202.165	192.133	261.239	288.092	271.253	251.294	265.106	331.074	278.068	258.032	252.514	202.762	262.796	283.7	200.087	348.032	290.473	344.564	341.646	292.83	258.926	274.933	275.205	288.476	306.153	292.992
KCNK1	uc010pxo.1	0.0937805	0.00241479	24	18	40.4625	0.226258	0.0488609	24	17.5	9.17158	N	N		141.361	181.494	133.449	161.535	146.545	158.703	160.126	148.805	201.961	144.167	149.038	177.831	176.383	209.091	222.574	177.234	223.546	168.214	227.97	221.156	224.106	189.719	194.673	219.704	102.362	100.163	100.316	81.3442	80.7807	114.751	65.9839	90.0672	80.9758	117.119	110.132
PRPF31	uc002qdh.2	0.0937805	0.00241479	24	4	23.4242	1	1	24	5.5	10.9995	N	N		917.371	1005.36	995.574	981.264	1091.76	996.853	920.727	980.52	992.615	860.028	980.415	900.173	898.083	912.654	865.168	912.978	814.952	902.863	966.995	810.355	923.102	857.25	914.012	829.773	1090.89	1169.4	966.086	1094.08	1007.23	1085.72	1071.14	1060.79	1040.03	1082.84	995.343
PIGL	uc002gpv.3	0.0937805	0.00241479	24	3	7.45703	0.6955	0.267231	24	19	2.05794	N	N		54.4827	57.0994	31.7736	57.8633	58.6181	52.0744	49.2697	46.5016	47.2674	49.7126	43.0952	39.3432	26.4574	87.5922	23.3344	40.2127	33.9563	32.6129	40.0827	36.3092	44.4654	46.3758	41.546	47.0793	40.9449	62.6019	58.8811	38.6385	55.5368	47.0774	24.1941	57.5429	35.4269	36.985	56.1049
GNB2L1	uc003mni.1	0.102024	0.00303752	24	5	1575.41	0.0884636	0.0109801	24	0	841.82	Y	N		15215.4	15902.2	12328.2	15637.5	14934.8	14461.8	12907.1	14212.2	13064.4	13096	13029.1	13269.7	12696.6	12847.8	10764.3	11605.1	12068.7	12137.2	10268.7	11711.4	10870.9	12150.5	10653.6	11181.3	15725.8	17220.5	15679.8	18337	15714.4	16668.3	15086.1	15571.6	16622.8	14950.1	13895.3
RPL3	uc003axi.3	0.102024	0.00303752	24	5	294.6	0.162076	0.0286919	24	19	186.227	Y	Y		2974.46	3662.52	2721.94	3599.58	3383.37	3206.3	3125.55	3182.04	3227.07	3203.15	3411.7	3090.81	2994.1	3130.71	2622.43	2948.93	2716.51	2639.93	2753.18	2846.97	2948.95	2864.06	2673.19	2824.76	2284.14	2421.44	2453.38	2716.9	2433.52	2268.54	2516.18	2394.29	3066.96	2171.84	2591.22
MAT2A	uc002spr.3	0.102024	0.00303752	24	5	201.44	0.162076	0.0286919	24	17	115.668	Y	N	C	1640.37	1971.97	1639.52	2114.42	1753.05	2080.5	1576.63	2069.99	1502.53	1902.34	1537.06	1860.15	1447.81	1593.61	1292.37	1458.08	1451.63	1479.6	1295.17	1485.38	1293.05	1437.65	1354.4	1355.49	1506.19	1452.36	1533.09	1801.77	1638.33	1683.02	1629.8	1536.15	1938.36	1851.3	1691.46
EIF4G1	uc003fnw.3	0.102024	0.00303752	24	4	161.253	0.76481	0.306247	24	2	135.295	N	Y	CA	6243.42	5597.78	5418.47	5617.56	6105.44	5596.76	5539.76	5234.75	5255.27	5307.65	5447.95	5537.95	5257.68	5201.84	4837.4	5190.42	5073.64	5152.84	4975.26	5294.54	4896.53	5336.03	4782.54	5280.73	7729.81	7770.15	7181.31	7766.34	6704.8	6867.41	6919.51	7182.86	7702.82	7429.87	6576.74
RPL10A	uc003okp.1	0.102024	0.00303752	24	6	131.38	1	1	24	16.5	12.4432	N	Y		1575.58	1666.08	1234.94	1699.73	1558.88	1495.28	1561.23	1504	1462.42	1504.64	1490.38	1490.32	1412.53	1486.24	1295.96	1420.85	1349.76	1309.67	1260.1	1346.74	1296.61	1347.71	1384.08	1302.53	1152.31	1094.28	1096.93	1073.74	1128.41	1150.45	1126.12	1025.77	1201.98	1095.17	989.109
TRAM1	uc003xyo.2	0.102024	0.00303752	24	17.5	129.121	1	0.580561	24	20.5	79.0106	N	N		1828.85	1558	1728.49	1861.27	1483.77	1718.46	1682.87	1675.39	1516.85	1716.74	1574.77	1773.59	1928.45	1723.59	1854.19	1921.27	1867.6	2138.72	1788.69	2034.96	1844.43	1964.65	1604.86	1877.29	1558.83	1489.93	1687.93	1606.55	1502.02	1541.78	1357.07	1521.14	1472.75	1674.6	1489.9
PABPC1	uc003yjs.1	0.102024	0.00303752	24	2	124.917	1	1	24	15.5	29.1685	N	Y		1923.09	1908.75	1838.63	1800.99	1800.68	1901.96	1592.03	1676.72	1524.01	1814.51	1450.87	1779.89	1522.77	1415.6	1344.42	1508.72	1627.07	1572.29	1458.01	1498.58	1643.44	1616.13	1368.64	1537.93	1743.08	1529.99	1840.58	1950.23	1789.8	1479.99	1750.77	1718.78	2378.66	1956.09	1616.65
UACA	uc002asr.3	0.102024	0.00303752	24	18	102.559	0.0239819	0.00117956	24	6	87.9799	Y	N		796.626	485.345	1040.06	641.318	602.668	607.535	715.95	593.892	710.443	606.494	725.436	706.605	890.734	745.946	911.837	787.871	829.101	731.216	881.819	840.062	942.667	826.332	764.447	808.195	503.037	495.807	577.907	473.83	507.404	444.293	556.464	530.396	465.611	419.163	423.904
PPIL1	uc003omu.2	0.102024	0.00303752	24	7.5	83.7544	1	0.735861	24	3.5	13.0664	N	N		930.624	1029.83	1010.4	887.237	1176.03	1063.81	1110.11	1100.1	1090.01	967.739	1163.57	1035.51	990.684	1068.06	935.171	942.765	916.821	1005.85	979.52	901.128	949.782	888.167	921.134	878.814	538.133	535.872	538.653	532.805	557.892	591.409	549.866	470.351	541.526	517.79	515.334
OTUB1	uc001nyg.1	0.102024	0.00303752	24	7	79.7063	1	1	24	8.5	14.8591	N	Y		1261.94	1329.6	1209.52	1342.91	1472.78	1296.9	1291.79	1275.47	1373.62	1280.93	1418.55	1175.58	1272.9	1181.08	1188.26	1209.36	1160.18	1198.1	1052.17	1191.6	1125.86	1190.31	1185.84	1143.64	1436	1412.3	1430.59	1380.82	1373.27	1494.71	1337.27	1388.54	1414.55	1329.4	1479.51
CUL4A	uc021rmv.1	0.102024	0.00303752	24	6	78.5886	1	1	24	5.5	11.4535	N	N		2305.94	1998.48	2262.28	2008.34	2139.56	2127.61	2053.93	2173.62	2124.17	2084.62	2052.41	2132.4	2079.85	1963.76	1870.34	1962.98	1944	2004.84	1939	1968.95	1995.61	2005.4	1958.6	1855.71	2544.43	2173.54	2335.62	2566.41	2438.57	2192.04	2452.4	2341.75	2247.08	2297.18	2202.64
F2R	uc003ken.4	0.102024	0.00303752	24	18	77.708	0.429583	0.129367	24	15	27.8899	N	N		170.811	218.201	207.588	318.248	214.323	245.494	223.253	325.511	287.901	316.504	271.141	276.976	323.369	347.543	324.887	344.042	336.734	432.55	385.796	368.043	384.181	428.625	381.036	404.098	140.382	175.285	174.463	183.025	169.135	200.079	186.954	177.633	225.214	174.651	197.406
NUAK1	uc001tlj.1	0.102024	0.00303752	24	18	68.9969	0.20269	0.0410599	24	19	22.8874	N	N		425.554	503.698	410.939	602.742	459.786	428.994	431.11	462.359	548.588	473.927	499.186	522.478	596.762	542.506	576.18	509.361	551.791	559.569	628.797	643.663	674.096	557.915	586.392	617.916	301.237	302.993	305.309	357.915	262.537	294.234	279.332	317.737	204.97	322.591	295.07
OSER1	uc002xlk.3	0.102024	0.00303752	24	6	54.2963	1	1	24	5.5	12.8179	N	N		503.597	554.68	461.777	525.591	531.227	597.616	572.76	555.362	547.156	513.697	565.624	517.757	479.174	423.833	454.123	478.085	464.07	516.657	380.785	470.369	499.791	456.731	468.876	527.681	342.182	418.181	416.529	380.284	305.452	408.985	413.499	370.276	427.653	386.287	353.253
FASTKD5	uc002whz.4	0.102024	0.00303752	24	4	46.9487	0.76481	0.306247	24	7	26.8893	N	N		450.587	471.07	478.723	528.002	483.6	478.589	486.538	474.316	435.433	473.927	398.63	435.923	455.656	344.718	389.505	402.127	398.987	470.313	403.332	420.856	401.967	462.353	348.986	402.136	582.002	518.344	577.907	595.846	555.368	561.986	587.256	630.47	597.196	556.829	511.178
SLC25A22	uc009yci.3	0.102024	0.00303752	24	4	37.7834	1	1	24	14.5	2.63364	N	N		248.853	214.123	165.223	229.042	225.313	203.338	203.237	182.021	206.258	170.68	195.724	129.046	141.106	149.754	134.622	165.319	104.699	178.513	137.784	146.887	170.747	189.719	164.997	151.046	231.046	325.53	209.355	254.201	196.903	173.598	219.946	240.179	323.903	244.512	274.291
MSRB2	uc001iro.3	0.102024	0.00303752	24	16.5	36.3295	1	1	24	14.5	0.177252	N	N		166.393	167.22	160.986	173.59	161.2	200.859	144.73	186.006	209.122	182.28	188.541	210.88	204.31	240.172	186.675	245.744	249.013	207.693	220.455	236.01	238.335	219.231	235.032	241.282	245.669	230.375	257.332	221.663	247.391	205.963	239.741	257.692	258.11	252.731	255.589
ACAD9	uc003ela.4	0.102024	0.00303752	24	6	35.2858	1	0.513638	24	3	7.3544	N	Y		384.324	367.067	398.23	397.81	395.672	443.873	392.618	373.342	395.327	405.986	420.178	401.301	358.645	361.671	332.066	336.595	348.053	348.443	298.115	341.636	410.861	362.574	345.425	355.057	336.333	363.091	355.467	374.183	348.367	397.215	336.518	332.748	331.495	310.263	336.629
TM4SF1	uc003exb.1	0.102024	0.00303752	24	6	33.2801	1	1	24	9.5	5.7746	N	N		210.568	334.439	262.662	224.22	263.782	247.973	294.078	289.639	234.904	271.762	204.702	245.502	183.732	228.87	183.085	233.829	200.908	226.574	210.434	179.895	220.549	213.61	198.234	178.509	386.052	478.278	416.529	335.545	345.843	344.253	314.523	337.752	668.05	384.233	257.667
CCDC147	uc001kyh.3	0.102024	0.00303752	24	5	32.0502	0.162076	0.0286919	24	14	34.7936	Y	N		139.888	91.7668	141.922	173.59	122.732	141.345	115.476	85.0315	81.6436	114.339	71.8253	102.292	98.4805	33.9066	70.0032	75.9574	93.3799	65.2259	47.5982	42.9109	46.244	70.2664	60.5385	60.8108	222.272	187.806	292.225	268.436	300.403	303.061	395.903	365.273	415.001	402.725	299.226
KLHDC8B	uc003cwh.3	0.102024	0.00303752	24	16	24.928	0.031144	0.00191087	24	20	24.6365	Y	N		89.8229	134.591	135.568	89.2059	119.068	101.669	169.365	118.247	166.152	139.195	179.563	122.751	139.636	144.103	183.085	159.362	186.76	159.632	185.382	174.944	179.64	123.669	170.932	127.507	131.609	147.74	128.666	119.983	123.695	117.693	114.372	120.09	111.342	100.681	137.145
LSM1	uc003xkw.3	0.102024	0.00303752	24	3	21.7679	1	1	24	9.5	1.32269	N	N		200.261	193.73	165.223	185.645	131.891	188.46	163.206	172.72	158.99	167.366	120.307	188.848	152.865	138.452	132.827	113.191	130.166	139.034	110.227	141.936	151.182	161.613	166.184	153.008	254.443	162.765	246.428	203.361	239.818	153.001	186.954	200.149	197.378	195.198	187.016
CROT	uc003uiu.3	0.102024	0.00303752	24	6	21.2335	1	1	24	10.5	0	N	N		217.931	189.651	196.997	226.631	168.527	168.622	204.777	212.579	153.261	173.994	149.038	168.389	166.094	166.708	156.161	148.936	166.952	154.482	112.733	140.285	129.839	143.343	109.207	166.739	187.177	190.31	222.44	217.596	194.379	188.309	197.952	220.164	149.299	166.432	170.393
DDX55	uc001ufi.3	0.102024	0.00303752	24	7	16.5241	1	0.45321	24	6.5	15.2121	N	N		363.709	248.79	292.318	267.618	331.559	252.933	275.602	267.052	269.281	286.676	274.732	273.829	263.105	214.742	262.063	248.723	249.013	221.425	237.991	245.912	229.442	207.988	255.211	243.243	216.423	262.928	263.875	237.932	260.013	211.848	257.337	305.228	275.824	273.278	222.342
CHST4	uc002fao.3	0.102024	0.00303752	24	6.5	16.0211	0.6955	0.267231	24	5	17.0313	N	N		66.2628	114.199	46.6013	40.9865	73.2727	61.9934	61.5871	93.0032	57.2938	71.2547	52.0733	50.3593	38.2163	33.9066	32.3092	49.1489	33.9563	41.1953	27.5568	39.61	26.6793	36.5385	53.4163	25.5013	58.4927	92.6508	63.2427	87.445	90.8783	82.3854	74.7817	75.056	48.0794	61.6416	39.4812
RPS5	uc002qsn.3	0.115999	0.00380362	24	5	355.219	1	0.45321	24	23	63.5831	N	Y		3385.29	3790.99	2700.76	3589.93	3676.46	3555.94	2943.86	3269.73	3168.35	3121.95	3110.04	2862.61	2633.98	3187.22	2398.06	2867.02	2634.45	2665.68	2329.81	2746.29	2260.62	2713.69	2504.63	2695.29	3699.66	4261.94	3452.18	4471.9	3577.07	3710.29	3591.72	3610.19	4139.89	3653.29	3418.24
UBA52	uc002njr.3	0.115999	0.00380362	24	6.5	350.844	0.579956	0.201719	24	0	126.97	N	Y		3609.11	3674.75	3101.11	3553.77	4070.3	3536.1	3656.73	3673.63	3742.72	3415.26	3918.07	3352.04	3370.38	3483.91	3108.86	3071.06	3412.61	3456.97	3078.85	3008.71	2991.63	3169.01	3093.4	3079.77	3462.77	4464.77	3561.22	3900.46	3637.66	4157.52	3565.33	3652.73	3527.51	3458.09	3096.16
FADS2	uc001nsl.1	0.115999	0.00380362	24	17	338.403	1	1	24	15.5	88.824	N	N		1526.99	1702.78	1635.28	1885.38	1820.83	1720.94	1847.61	1954.4	2303.21	1908.96	2188.88	2053.72	2081.32	2511.92	2222.15	2159.57	2260.93	2536.94	2227.09	2303.98	2182.36	2486.02	2314.71	2512.86	1491.56	1682.74	1613.78	1637.05	1529.79	1809.54	1568.22	1798.84	1394.3	1734.18	2021.85
MMP14	uc001whc.3	0.115999	0.00380362	24	18	323.277	1	1	24	15.5	73.7855	N	N		1150.03	1490.7	1273.06	1391.13	1381.19	1460.56	1579.71	1363.16	1672.98	1440.01	1501.15	1482.45	1668.29	2037.22	1882.91	1757.44	1675.18	1747.37	2046.72	1962.35	2057.86	1897.19	1957.41	2120.53	1801.58	1880.56	1805.69	1850.58	1777.18	1856.61	1792.56	1751.31	1811.83	2130.75	2026.01
SLC38A2	uc001rpg.3	0.115999	0.00380362	24	16.5	313.269	1	1	24	11.5	35.7948	N	N		3084.9	2932.46	3397.66	3204.18	2608.51	3020.32	2802.21	3261.76	3141.13	3425.2	2829.92	3421.29	3523.25	3619.53	3440.93	3884.25	3460.72	4536.63	3271.75	4135.95	3370.48	4196.31	3156.31	4141.02	3345.78	3105.05	3504.52	3060.58	3193.36	3186.55	3118.84	3114.82	2955.62	3453.98	3008.89
NEDD9	uc010joz.2	0.115999	0.00380362	24	18	174.354	1	0.45321	24	18	27.0681	N	N		265.051	265.104	302.909	366.467	311.409	280.21	371.062	273.695	469.809	304.904	443.521	303.73	533.558	392.752	613.874	393.191	608.384	516.657	656.354	561.142	706.111	549.483	619.629	594.377	198.875	195.318	252.971	166.756	222.147	194.194	182.555	225.168	258.11	162.323	270.135
PLIN3	uc002mbj.2	0.115999	0.00380362	24	5	127.025	1	1	24	16.5	20.1444	N	N		2012.92	2259.5	2018.69	2153	2553.55	2095.38	2334.15	2069.99	2257.37	2140.96	2513.89	2006.51	1777.06	2161.55	1872.14	1940.64	1878.92	1834.91	2224.59	1917.78	1990.27	1959.03	2007.27	1934.18	2137.91	2731.95	2209.13	2226.8	2473.91	2421.54	2434.8	2584.43	2333.11	2377.31	2632.77
WDR46	uc003ods.3	0.115999	0.00380362	24	5	125.131	0.0884636	0.0109801	24	0	61.7803	Y	N		1198.62	1160.34	1057	1159.68	1201.67	1224.99	1053.14	1151.91	1075.69	1145.05	1077.38	1137.81	987.744	1150	919.016	1058.93	959.267	928.61	866.788	1109.08	901.759	964.054	924.695	996.513	1702.14	1677.73	1504.74	1547.57	1572.7	1556.5	1436.25	1543.65	1624.58	1469.13	1402.62
TAP2	uc011dqf.1	0.115999	0.00380362	24	6	117.537	0.919723	0.398806	24	3	55.092	N	N		924.734	1162.38	783.75	1191.02	1130.23	1011.73	846.823	1052.27	919.565	1010.82	921.16	928.5	774.615	822.236	714.392	924.892	707.424	835.921	686.416	818.607	645.638	761.687	758.511	802.31	1509.11	1732.82	1480.75	1698.06	1469.2	1656.53	1361.47	1541.15	1718.2	1543.1	1367.3
PAF1	uc002old.4	0.115999	0.00380362	24	4.5	92.5897	0.20269	0.0410599	24	8.5	34.7355	N	Y		1033.7	956.414	1116.31	1371.84	1078.94	1024.13	1034.66	1145.27	895.215	1045.62	922.955	1002.47	981.865	864.62	883.117	1011.28	880.035	902.863	886.829	909.38	837.729	1025.89	950.81	884.699	1000.23	956.557	976.99	1071.71	1052.67	988.625	1062.34	1043.28	1050.15	1140.37	1005.73
KIAA1324	uc021orb.1	0.115999	0.00380362	24	6	88.9221	1	1	24	14.5	7.57276	N	N		428.499	358.91	389.757	520.769	415.822	401.717	354.126	393.271	290.766	303.247	398.63	357.237	323.369	358.845	278.218	323.191	333.904	293.516	237.991	249.213	243.671	257.175	258.772	258.936	590.776	603.482	536.472	719.896	527.599	656.141	626.847	673.002	508.629	591.759	585.985
BIN1	uc002tns.2	0.115999	0.00380362	24	5	71.3571	1	1	24	7.5	17.8438	N	Y		505.069	552.64	489.314	600.331	595.34	607.535	441.887	539.419	555.75	512.04	488.412	494.151	427.729	474.693	427.199	478.085	444.262	435.983	378.28	509.979	373.51	456.731	424.956	429.599	421.147	483.287	484.134	441.292	434.196	470.774	523.472	482.86	377.043	427.382	492.476
PLBD2	uc001tve.2	0.115999	0.00380362	24	15	66.7602	1	1	24	8.5	18.5359	N	Y		912.954	995.16	821.878	826.962	981.854	974.536	959.219	941.99	1097.18	1005.85	1043.26	1013.48	1021.55	1200.86	1112.87	1060.42	987.564	1088.24	1082.23	1077.72	1068.95	1180.47	987.608	1145.6	1383.35	1745.34	1467.67	1486.57	1418.71	1550.61	1409.86	1648.73	1313.33	1541.04	1529.38
HEXA	uc010ukn.2	0.115999	0.00380362	24	16.5	63.699	0.636471	0.232515	24	5.5	75.9575	N	N		1198.62	1360.19	1351.44	1408.01	1320.74	1383.69	1422.66	1360.5	1468.15	1483.09	1479.6	1377.01	1466.92	1602.09	1439.55	1440.21	1511.06	1640.95	1498.09	1473.82	1527.83	1498.08	1407.82	1488.88	1956.58	2063.36	1977.97	1860.75	1842.81	2086.12	1772.77	1953.96	1923.17	2073.21	1899.26
CIAO1	uc002svs.3	0.115999	0.00380362	24	7	62.6781	0.386928	0.110879	24	0	38.1868	N	N		901.174	1088.97	817.642	882.415	965.367	974.536	948.441	1080.17	943.915	977.681	899.612	948.959	846.638	909.828	895.682	860.85	831.93	779.277	811.674	915.982	835.95	858.655	808.367	855.275	1295.61	1507.45	1229.96	1311.68	1196.56	1218.13	1357.07	1208.4	1333.57	1195.85	1259.24
TCEB1	uc022avx.1	0.115999	0.00380362	24	7	54.9923	1	1	24	10.5	11.2236	N	N		357.819	440.481	430.003	409.865	467.113	481.069	468.062	510.189	454.053	462.327	465.069	478.414	424.789	508.6	310.527	495.957	339.563	427.401	320.661	420.856	346.83	361.169	341.864	390.366	424.072	398.148	433.976	547.04	424.099	408.985	431.095	427.819	371.982	355.467	361.565
DIP2C	uc001ifp.3	0.115999	0.00380362	24	17.5	49.9051	0.840422	0.349965	24	21	15.3298	N	N		129.581	154.984	118.622	86.7949	152.041	114.068	158.587	134.19	144.667	162.395	158.016	129.046	171.973	228.87	201.035	166.808	181.1	238.589	192.898	227.758	270.35	210.799	220.787	251.09	99.4376	95.1549	109.039	103.714	95.9271	82.3854	76.9812	82.5616	63.2623	96.5719	108.054
TCEAL8	uc004ejx.3	0.115999	0.00380362	24	22.5	46.1316	1	0.654469	24	15	10.2888	N	N		580.167	534.287	540.152	515.947	452.459	525.704	460.364	457.044	449.756	472.27	386.061	465.824	552.666	440.786	475.663	500.425	506.515	511.508	493.518	572.695	483.784	503.107	544.846	553.182	476.716	420.685	477.591	402.654	555.368	432.523	461.887	480.358	440.306	530.118	461.307
PSG4	uc002ovy.4	0.115999	0.00380362	24	3	32.1173	1	0.654469	24	14	6.68229	N	N		201.733	191.691	156.75	180.823	152.041	176.061	166.285	172.72	120.317	154.109	111.329	144.783	174.913	104.545	95.1326	128.085	149.974	101.272	70.1447	120.48	110.274	125.074	130.573	127.507	365.579	340.554	359.829	351.814	340.794	367.792	402.502	400.299	339.086	402.725	411.436
PTGIS	uc002xut.3	0.115999	0.00380362	24	16	26.3856	1	0.825244	24	19	2.34997	N	N		35.3401	46.903	29.6554	55.4523	56.7863	49.5947	78.5236	38.5299	73.0496	51.3697	86.1904	50.3593	86.7216	96.0688	96.9275	69.9999	99.0393	78.9576	112.733	80.8704	140.511	70.2664	79.5309	76.5039	23.3971	15.0245	39.2541	34.5713	15.1464	26.481	41.7898	30.0224	25.3049	22.6019	29.0914
NEO1	uc002avm.4	0.115999	0.00380362	24	17	25.1164	1	1	24	6.5	12.514	N	Y		584.585	509.816	493.551	528.002	452.459	438.913	518.871	514.175	498.456	485.527	518.938	525.626	589.413	449.263	586.95	533.191	597.066	526.956	543.621	575.996	554.929	559.32	527.041	545.336	549.831	560.913	636.788	612.115	560.416	612.006	534.469	632.972	455.489	591.759	604.686
WIPI1	uc010dey.3	0.115999	0.00380362	24	20	17.6896	1	1	24	13.5	21.0739	N	N		172.283	132.552	148.277	176.001	168.527	128.946	160.126	118.247	110.291	117.653	120.307	122.751	152.865	189.312	177.7	144.468	169.782	178.513	202.919	173.294	184.976	165.829	142.443	184.394	403.6	445.725	335.84	404.688	302.928	376.619	299.127	360.269	321.373	386.287	336.629
CCDC134	uc003bbh.1	0.115999	0.00380362	24	4.5	15.5134	0.282531	0.0684872	24	9	15.6041	N	Y		253.271	256.947	266.899	313.426	265.613	297.568	292.539	249.78	259.254	253.534	276.527	267.534	245.466	211.917	217.189	236.808	189.59	247.172	240.496	207.953	268.571	245.932	225.535	217.742	245.669	227.871	298.767	268.436	252.44	258.926	281.531	262.696	260.641	275.333	280.525
PSMD3	uc002htn.2	0.128459	0.00474194	24	6	324.87	1	1	24	11.5	85.7255	N	Y		2970.04	3374.98	2705	3151.14	3174.54	3129.43	2816.07	3182.04	2864.69	3100.41	2693.45	3004.25	2423.8	2656.02	2284.98	2871.49	2572.19	2809.86	2472.6	2627.46	2193.04	2570.34	2205.5	2624.67	3948.26	4394.65	3469.62	3908.59	3612.41	3992.75	3591.72	3552.65	3823.57	4099.17	3709.16
PTTG1	uc003lyk.3	0.128459	0.00474194	24	7.5	232.196	0.0154744	0.00055099	24	11	135.361	N	N		2242.63	1904.67	2537.66	1931.19	2505.93	2268.96	2588.2	2192.22	2644.11	2089.59	2707.81	2008.08	2401.75	1989.19	1789.57	1952.55	2252.44	2030.58	1863.84	1610.81	1986.72	1738.39	1972.84	1630.12	1155.23	1114.31	1421.87	1275.07	1666.1	1535.9	1526.43	1518.63	1599.27	1479.4	1494.05
RCC1	uc001bqf.2	0.128459	0.00474194	24	6	198.149	1	0.825244	24	8	21.4561	N	N		1314.95	1704.82	1463.71	1530.97	1538.73	1663.9	1184.01	1634.2	1324.92	1585.83	1256.94	1449.4	1146.49	1299.75	1035.69	1330	1160.18	1234.14	1104.78	1251.02	939.11	1195.93	1134.8	1141.67	1073.34	1154.38	1016.24	856.148	1125.88	965.086	989.758	965.721	1072.93	1000.65	933.004
CDC25B	uc002wjn.3	0.128459	0.00474194	24	6	136.279	0.00451691	4.13437e-05	24	10	120.949	Y	N		1107.32	1131.79	1554.79	1335.68	1615.66	1187.79	1699.8	1258.2	1405.13	1302.47	1429.32	1260.56	1109.74	1240.42	1132.62	991.914	1114.9	1064.21	1292.67	922.583	1211.24	1052.59	1165.66	1029.86	508.887	480.783	540.834	514.502	595.758	632.602	699.429	718.036	559.239	719.152	594.296
SF3A1	uc003ahl.3	0.128459	0.00474194	24	6	128.642	0.349865	0.0947331	24	3.5	154.81	N	Y		2495.9	2487.9	2412.68	2427.85	2615.83	2206.96	2338.77	2404.8	2437.85	2338.15	2461.81	2360.59	2290.04	2277.4	2198.82	2113.4	2252.44	2229.69	2076.78	2133.99	2235.72	2186.69	2233.99	2238.23	2854.44	3007.4	2747.79	2840.95	2711.2	2845.24	2760.33	2712.02	2763.3	2886.88	2406.28
AKAP12	uc011eep.2	0.128459	0.00474194	24	4.5	115.324	1	1	24	8.5	18.1538	N	N		1161.81	1025.75	1095.13	1188.61	1042.3	1101	909.949	949.962	875.162	916.369	935.525	994.597	933.36	774.202	861.578	822.127	865.887	793.009	794.138	780.647	779.034	834.764	854.661	743.461	2971.43	2751.98	2745.6	2316.28	2784.41	2283.25	2634.96	2339.25	3087.2	2420.46	2389.65
CALB2	uc002faa.4	0.128459	0.00474194	24	6	103.493	0.523766	0.174483	24	4	27.2165	N	N		2035	1502.94	1849.23	1555.08	1749.38	1584.55	1613.58	1604.97	1624.28	1582.52	1571.18	1606.78	1644.77	1460.81	1376.73	1449.15	1522.38	1453.85	1402.89	1467.22	1293.05	1471.38	1477.85	1371.19	2886.61	2631.78	2802.3	2692.49	2819.75	2704.01	2606.36	2596.94	2568.45	2701.96	2593.29
ALG8	uc001oza.1	0.128459	0.00474194	24	7	102.46	1	1	24	7.5	26.4512	N	N		1236.9	1266.38	1237.05	1253.7	1148.55	1353.94	1308.73	1335.26	1227.52	1279.27	1170.75	1258.98	1165.6	1144.35	1089.54	1192.98	1027.18	1299.37	1052.17	1112.38	937.331	1108.8	867.718	1004.36	1292.69	1262.05	1201.61	1348.28	1130.93	1332.88	1128.32	1428.57	1118.48	1362.28	1107.55
MAPKAPK3	uc003day.2	0.128459	0.00474194	24	6.5	64.1116	0.00135071	2.58131e-06	24	1	72.2914	Y	N		562.497	624.014	502.024	499.071	613.659	548.021	531.189	596.549	638.826	533.582	579.989	508.315	501.221	534.03	427.199	458.723	449.922	451.432	408.342	528.134	430.425	489.054	395.281	466.87	1234.2	1219.48	990.075	1006.63	1002.19	959.201	901.78	903.174	908.447	865.037	887.289
TCF4	uc002lga.3	0.128459	0.00474194	24	17	61.9406	0.579956	0.201719	24	18.5	36.2621	N	N		390.214	397.656	372.811	339.947	392.009	347.163	443.427	377.327	465.512	381.13	438.134	424.907	451.246	372.973	509.767	385.744	529.153	490.91	533.601	407.653	496.234	477.811	519.919	447.254	289.539	262.928	287.863	390.452	265.062	253.041	261.736	255.19	250.519	293.825	309.616
ATP11B	uc003flb.3	0.128459	0.00474194	24	18	49.6237	0.579956	0.201719	24	16	25.2083	N	N		449.114	418.049	565.571	455.673	370.027	389.318	412.634	441.101	459.783	449.071	454.295	443.792	496.812	418.182	488.227	510.85	492.367	511.508	558.652	511.629	617.18	515.755	428.517	449.215	503.037	513.336	549.557	506.368	492.258	494.312	501.477	530.396	528.873	515.735	542.347
SMPDL3B	uc001bpg.3	0.128459	0.00474194	24	16.5	46.991	1	1	24	15.5	2.75076	N	N		114.855	85.649	144.041	77.151	109.909	109.108	155.507	110.275	206.258	154.109	208.293	140.062	208.72	189.312	222.574	159.362	249.013	180.229	225.465	181.546	241.892	178.477	229.097	209.895	29.2464	25.0408	28.3502	30.5041	30.2928	8.82701	32.9919	12.5093	48.0794	28.7661	58.1829
AP1M1	uc002ndv.2	0.128459	0.00474194	24	3	40.1876	0.315173	0.0806795	24	5	35.6906	N	Y		820.186	825.901	762.568	834.195	926.899	825.752	774.458	803.814	744.819	810.316	790.078	734.932	665.846	757.248	696.442	720.85	766.847	765.546	696.436	747.639	736.348	802.442	707.469	753.269	1114.29	1294.61	1151.45	1159.16	1113.26	1253.43	1088.73	1150.86	1133.66	1210.23	1113.79
COMMD5	uc010mgf.2	0.128459	0.00474194	24	5	39.4156	1	0.513638	24	0	24.2209	N	Y	Y	179.646	320.164	222.416	282.083	265.613	327.325	237.11	302.925	280.739	256.848	260.367	242.354	173.443	302.334	204.625	208.51	175.441	202.543	182.877	209.603	176.083	250.148	221.974	229.512	327.559	390.636	357.648	412.822	320.599	358.965	327.72	372.778	308.72	406.835	334.552
DAAM2	uc003oow.3	0.128459	0.00474194	24	16.5	37.6072	1	1	24	17.5	3.20436	N	N		276.831	250.829	252.071	250.741	298.586	223.176	290.999	251.109	317.98	268.448	316.031	258.092	343.947	307.985	323.092	282.978	413.136	336.428	318.156	311.929	357.502	330.252	352.548	290.323	155.006	130.212	165.739	156.588	151.464	147.117	136.367	150.112	88.5673	129.447	164.159
DNTTIP1	uc002xpk.3	0.128459	0.00474194	24	3.5	33.1644	1	0.735861	24	23	8.92906	N	Y		546.3	473.109	597.345	544.879	575.19	508.346	614.331	512.846	522.806	457.356	477.638	470.545	465.945	457.74	498.997	446.808	427.284	463.447	513.559	439.011	542.478	476.406	503.3	464.908	646.344	608.49	560.461	557.208	550.319	591.409	604.852	612.957	718.66	532.173	513.256
SEPW1	uc021uwp.1	0.128459	0.00474194	24	17	32.3869	1	1	24	17.5	14.61	N	N		198.788	293.654	237.243	270.029	232.641	282.69	217.095	264.395	275.01	298.276	305.258	272.255	321.899	423.833	301.552	291.915	367.86	315.83	375.775	326.783	270.35	271.228	306.253	351.133	204.724	235.383	257.332	239.965	229.72	332.484	263.935	260.194	232.805	209.581	230.654
MPV17	uc002rjs.3	0.128459	0.00474194	24	5	29.7994	0.315173	0.0806795	24	4.5	35.0438	N	Y	A	621.397	560.797	468.132	532.824	522.068	493.467	555.824	507.532	471.241	500.44	495.595	497.299	468.885	534.03	411.044	437.872	398.987	458.298	430.889	476.971	451.769	475.001	480.747	460.985	944.657	996.622	846.143	803.274	800.234	882.701	791.806	825.616	870.49	813.669	822.872
KIAA0319L	uc001byx.3	0.128459	0.00474194	24	17	23.3648	0.840422	0.349965	24	11	22.6688	N	N		241.491	277.34	226.652	178.412	201.5	225.656	237.11	215.236	264.984	248.563	238.819	248.649	221.949	228.87	262.063	271.063	331.074	267.769	265.548	265.717	297.029	245.932	264.707	276.591	564.455	398.148	488.495	467.729	474.587	503.139	512.475	460.344	506.099	521.899	488.321
IMPA2	uc002kqp.2	0.128459	0.00474194	24	15	22.7268	1	0.825244	24	6	7.03973	N	N		66.2628	93.8061	116.503	91.6168	102.582	109.108	115.476	128.876	127.479	115.996	150.833	138.488	132.287	172.359	152.571	128.085	138.655	147.616	172.857	169.993	138.732	141.938	112.768	192.241	52.6434	55.0897	76.3274	46.7729	70.6831	41.1927	76.9812	50.0373	35.4269	34.9302	62.3388
TUBGCP2	uc010qvc.2	0.128459	0.00474194	24	3	21.9155	1	1	24	10.5	6.66807	N	Y		558.08	603.622	582.517	720.88	626.481	565.38	554.284	601.864	570.073	541.867	635.654	544.51	480.643	534.03	529.511	549.574	543.301	573.301	538.611	549.589	540.7	560.726	593.514	572.799	737.008	781.272	704.393	754.468	691.685	726.757	587.256	708.028	708.538	717.097	606.764
FXR2	uc002gia.2	0.128459	0.00474194	24	2	21.6951	1	0.45321	24	2.5	27.29	N	Y		469.729	440.481	463.895	650.962	415.822	406.677	412.634	438.444	396.759	401.015	407.609	358.81	386.573	358.845	353.606	419.999	379.179	393.072	380.785	394.45	417.975	390.681	367.979	384.481	459.168	423.189	488.495	536.872	522.55	511.966	395.903	522.89	579.483	462.312	409.358
FOS	uc001xrn.3	0.128459	0.00474194	24	21	12.5187	0.429583	0.129367	24	16	16.2647	N	N		45.6477	157.023	31.7736	101.261	51.2909	49.5947	43.111	38.5299	25.7822	43.0843	41.2996	31.4746	52.9149	81.9411	55.6436	41.7021	48.1048	54.927	52.6085	56.1142	94.2667	71.6717	62.9125	76.5039	14.6232	27.5448	47.9772	30.5041	50.488	35.308	30.7925	40.0299	189.787	47.2586	43.6372
HDDC3	uc002bqe.4	0.128459	0.00474194	24	18	12.0911	1	1	24	14.5	1.00483	N	N		110.438	73.4135	93.2027	103.672	98.9181	89.2705	87.7616	86.3601	103.129	94.454	111.329	102.292	94.0709	132.801	131.032	107.234	116.018	109.854	127.764	110.578	119.167	111.021	141.256	115.737	90.6637	117.692	91.5928	113.882	108.549	135.347	112.173	110.082	78.4453	90.4077	66.4947
CCDC59	uc001szp.4	0.128459	0.00474194	24	2	11.6119	1	0.923131	24	12	10.2057	N	Y		185.536	152.945	196.997	209.754	130.059	131.426	127.793	138.176	120.317	129.253	120.307	154.226	104.36	113.022	123.852	113.191	144.314	125.302	110.227	127.082	138.732	101.184	125.825	147.123	122.835	85.1386	115.581	119.983	138.842	102.982	134.167	105.078	164.482	113.01	120.522
RELT	uc001otw.3	0.128459	0.00474194	24	5	10.138	0.475066	0.150471	24	3	12.018	N	N		79.5153	79.5313	74.1385	122.959	109.909	96.7097	100.079	90.346	88.8054	97.7681	89.7816	75.539	74.9627	107.371	68.2082	74.468	36.786	82.3906	65.1343	82.5209	74.7019	74.4823	70.0347	82.3888	125.759	192.814	128.666	183.025	143.891	129.463	103.375	117.588	177.135	164.378	120.522
ANXA2P2	uc010mjx.3	0.141355	0.00588624	24	19	433.026	1	1	24	15.5	34.9214	N	N		5205.31	4820.82	5744.68	6155.2	4422.01	5224.8	4676	5859.2	4806.95	5925.74	4918.24	5999.06	6221.91	5207.5	5722.31	6361.06	5945.19	5823.98	6305.51	6867.39	6362.11	6470.13	6091.83	6412.6	5428.12	4605	5515.2	5399.22	5510.76	4442.93	5505.25	5221.4	5308.97	5071.05	5508.67
EBNA1BP2	uc001cio.3	0.141355	0.00588624	24	5.5	282.915	1	0.45321	24	1	168.813	N	N		3252.77	3177.17	2887.17	2996.83	3084.78	3010.4	2445.01	3090.36	2530.95	2648.03	2521.07	2684.78	2494.35	2534.52	2227.54	2710.63	2323.18	2348.13	2009.14	2328.74	1817.75	2501.48	2012.01	2428.51	3301.91	3187.69	3000.76	3292.41	3004.03	2812.87	2835.11	2934.69	3413.64	2689.63	2429.13
CALM2	uc002rvt.2	0.141355	0.00588624	24	3	254.345	1	1	24	9.5	35.8755	N	N		5725.1	4372.18	6553.84	6012.96	4676.63	5837.3	4412.72	5444.67	3911.73	5526.39	4201.78	5183.87	4390.46	4150.74	4038.65	5068.29	4148.33	4057.74	4201.17	4682.23	4270.46	4223.01	4088.13	4370.53	3687.96	2751.98	3580.84	3219.2	4268.76	3330.72	3824.86	3299.96	3778.03	3301.94	3378.76
DDX39A	uc010xnp.2	0.141355	0.00588624	24	5	248.794	0.523766	0.174483	24	6	98.2848	N	N		1843.58	2073.93	1618.34	1948.06	2060.79	1963.95	1595.11	1816.22	1607.09	1675.32	1835.14	1668.15	1421.35	1774.45	1391.09	1568.3	1429	1558.55	1320.22	1468.87	1328.63	1543.05	1306.92	1510.46	1392.13	1377.24	1258.31	1358.45	1355.6	1468.23	1359.27	1383.53	1260.19	1425.98	1097.16
HM13	uc002wwc.3	0.141355	0.00588624	24	6	234.76	1	0.654469	24	2	61.2774	N	N		2993.6	3387.22	2702.88	3095.68	3156.22	3335.24	3020.85	3187.35	3125.38	3025.84	2971.77	2985.37	2901.5	3257.86	2679.87	2697.23	2773.1	2933.45	2630.43	2825.51	2595	2731.96	2606.72	2793.37	2997.75	3565.8	2691.08	3188.69	2925.78	3295.42	2795.52	3104.82	3163.12	3318.37	2867.58
RPS8	uc001cmi.3	0.141355	0.00588624	24	5	209.374	0.349865	0.0947331	24	19	79.0912	N	Y		2987.71	2722.42	2272.87	2953.44	2857.63	2373.11	2441.93	2468.57	2440.71	2666.25	2420.51	2557.31	2376.76	2127.64	2369.34	2317.44	2156.23	1884.68	2249.64	2196.71	2091.65	2320.2	2290.97	1993.03	2126.21	2055.85	2080.47	2289.84	2102.82	1753.63	2047.7	2061.54	2285.04	1921.16	2152.77
U2AF2	uc002qlu.3	0.141355	0.00588624	24	5	170.028	0.226258	0.0488609	24	11.5	39.7146	N	Y		2460.56	2522.57	2092.82	2608.67	2716.58	2402.86	2221.75	2346.34	2625.49	2260.27	2424.1	2203.22	2016.64	2500.62	2076.76	2158.08	2017.57	2135.29	2069.27	2188.45	2105.88	2214.8	2182.95	2293.16	2266.59	2579.2	2039.03	2281.71	2145.74	2033.15	2036.7	2144.1	2264.79	2225.26	1986.53
PMPCB	uc003vbk.1	0.141355	0.00588624	24	4.5	154.565	0.282531	0.0684872	24	5	79.6798	N	Y		1805.29	1496.82	1698.83	1547.84	1452.63	1621.75	1502.73	1597	1430.91	1511.26	1344.93	1469.86	1505.13	1198.03	1333.65	1257.02	1213.94	1376.61	1265.11	1341.79	1305.51	1195.93	1271.31	1245.64	1672.89	1479.91	1687.93	1549.61	1663.58	1727.15	1511.03	1456.09	1538.54	1430.09	1460.81
COL4A4	uc021vxr.1	0.141355	0.00588624	24	17.5	112.13	0.429583	0.129367	24	16	14.2498	N	N		150.196	228.397	199.115	224.22	174.023	275.251	206.317	239.151	244.931	283.362	229.841	236.059	285.152	409.705	317.707	364.893	305.607	381.056	375.775	463.767	417.975	458.137	382.223	484.525	111.136	100.163	124.305	99.6467	148.939	123.578	140.766	150.112	149.299	147.94	211.952
TRA2A	uc003swi.3	0.141355	0.00588624	24	2	105.247	0.282531	0.0684872	24	5	61.1803	N	Y		1453.36	1333.68	1427.7	1494.8	1192.51	1234.91	1134.74	1231.63	1025.56	1151.68	940.912	1104.76	1049.48	983.293	1021.33	1127.45	1044.16	1196.38	1072.21	1213.06	953.339	1177.66	985.234	1135.79	883.24	811.321	913.748	1010.7	928.978	900.355	1046.94	933.196	936.282	1012.98	783.391
FAH	uc002bfm.2	0.141355	0.00588624	24	6	82.7683	0.226258	0.0488609	24	2	64.4301	N	N		949.766	1170.54	862.125	1210.31	947.049	969.576	923.807	975.205	923.862	967.739	960.664	914.337	920.131	895.701	775.42	825.105	897.013	875.4	839.231	785.599	805.714	876.924	773.943	821.927	1155.23	1384.75	1203.79	1191.69	1045.1	1150.45	1205.31	1165.87	1022.32	1150.64	1163.66
RPL38	uc002jjy.1	0.141355	0.00588624	24	5.5	77.9456	1	1	24	14.5	3.59133	N	Y		1233.96	1296.97	917.199	1301.92	1055.13	977.016	1036.2	989.82	846.516	964.425	964.255	993.023	936.299	1028.5	843.628	930.85	854.568	793.009	771.592	911.03	771.92	916.273	879.588	880.776	649.269	731.19	756.731	728.031	716.929	853.277	684.033	690.515	842.654	735.59	729.364
AUP1	uc010yrx.2	0.141355	0.00588624	24	4.5	75.2241	1	0.825244	24	8	27.7723	N	N		976.271	1082.85	948.973	1157.27	1045.97	1053.89	982.314	1048.28	866.568	1029.05	937.32	892.305	840.759	1045.45	807.729	956.169	888.524	926.894	821.695	886.274	839.507	889.572	846.351	945.51	1257.59	1354.7	1186.35	1187.63	1138.5	1306.4	1082.14	1203.4	1374.06	1224.61	1088.85
SLC44A1	uc004bcn.3	0.141355	0.00588624	24	17	71.9443	1	1	24	12.5	4.07475	N	N		406.412	397.656	444.831	409.865	424.981	389.318	455.745	442.43	454.053	439.128	414.791	464.25	510.041	550.983	513.357	430.425	483.878	518.374	573.683	549.589	554.929	556.51	511.609	523.758	406.524	413.173	442.699	380.284	419.05	485.485	382.706	370.276	346.678	404.78	465.463
GRPEL1	uc003gjy.1	0.141355	0.00588624	24	6	60.1755	0.20269	0.0410599	24	1	57.6379	N	N		594.892	617.897	673.601	691.948	639.304	592.657	606.633	653.68	558.614	570.038	563.829	571.264	514.45	548.157	488.227	576.382	565.939	535.539	486.002	521.532	476.669	570.563	485.495	490.41	801.35	833.857	802.528	776.837	833.051	891.528	761.014	713.032	971.709	676.003	725.208
NCSTN	uc001fvx.3	0.141355	0.00588624	24	14	45.0504	1	1	24	5.5	1.91471	N	Y		1004.25	1219.48	1141.73	1116.28	1088.1	1133.24	1204.03	1244.91	1249	1234.53	1107.91	1265.28	1244.97	1463.64	1222.36	1318.08	1256.38	1287.35	1184.94	1264.22	1191.67	1290.09	1151.42	1243.68	1465.24	1352.2	1376.07	1563.84	1383.37	1450.57	1330.67	1353.51	1222.23	1352.01	1392.23
TOMM40	uc002paa.4	0.141355	0.00588624	24	5	41.6731	0.523766	0.174483	24	1	23.6693	N	N		724.473	609.74	554.98	612.386	859.122	647.211	686.696	653.68	698.984	583.295	680.545	621.623	580.594	596.192	608.489	554.042	506.515	554.42	546.126	582.597	601.173	649.261	667.11	615.955	704.837	818.833	660.777	732.098	656.343	720.872	686.232	673.002	660.459	706.824	558.971
MRPS17	uc003trd.3	0.141355	0.00588624	24	7	39.5395	1	1	24	12.5	6.77239	N	N		615.507	481.266	493.551	482.194	553.209	458.751	560.443	491.588	544.291	467.299	483.025	508.315	510.041	570.762	454.123	518.297	401.817	451.432	428.384	420.856	439.318	434.246	468.876	435.484	391.901	525.856	460.145	492.133	368.562	464.889	428.895	450.336	460.55	390.397	421.826
RNF123	uc003cxh.4	0.141355	0.00588624	24	18	37.76	1	1	24	7.5	11.6735	N	Y		298.919	285.497	285.963	156.713	280.268	277.73	326.412	276.352	328.007	248.563	337.579	218.748	305.73	339.066	339.246	294.893	379.179	331.279	358.239	330.083	366.395	310.577	357.296	339.364	336.333	418.181	333.66	368.083	472.062	459.004	413.499	332.748	430.184	456.148	390.656
CHCHD1	uc001jvc.4	0.141355	0.00588624	24	5	35.9236	1	0.735861	24	21	31.7543	N	N		912.954	960.493	923.554	1193.43	1064.29	952.218	946.902	1061.57	857.974	1019.11	955.277	1032.37	911.312	977.642	782.6	905.531	809.293	885.699	884.324	919.282	898.202	933.137	909.264	959.242	912.486	1004.13	990.075	1031.04	886.064	1047.47	958.966	928.193	878.081	941.062	920.536
ZNFX1	uc002xui.3	0.141355	0.00588624	24	3	35.1497	1	1	24	16.5	36.2521	N	N		798.098	762.684	707.493	904.113	697.922	746.4	692.855	737.383	676.067	707.576	648.223	689.294	659.966	649.877	572.59	629.999	616.874	712.335	616.271	732.785	661.646	670.341	638.621	621.84	1626.1	1550.02	1657.39	1775.34	1459.1	1574.15	1574.81	1343.5	1999.09	1612.96	1606.26
NUDT15	uc001vbw.1	0.141355	0.00588624	24	6	28.7664	0.0776988	0.00895623	24	11.5	17.3794	Y	N		265.051	240.633	275.372	335.125	287.595	233.095	274.063	248.451	289.334	261.82	265.754	256.518	252.816	234.521	224.369	215.957	234.865	212.842	260.537	189.798	240.113	206.583	235.032	211.857	204.724	122.7	165.739	160.655	159.037	170.655	186.954	170.127	184.726	172.597	214.03
FAM192A	uc021tiy.1	0.141355	0.00588624	24	3.5	21.1439	0.76481	0.306247	24	3	15.6285	N	Y		331.314	346.675	366.456	368.878	381.018	324.845	343.348	352.084	315.116	381.13	328.601	341.499	324.839	282.555	296.167	288.936	288.629	302.099	295.61	341.636	337.937	349.926	328.807	292.284	274.916	232.879	285.682	250.134	219.623	223.618	252.938	227.67	245.458	256.84	220.264
PABPC3	uc001upy.3	0.141355	0.00588624	24	6	19.4601	1	1	24	7.5	2.2404	N	Y		114.855	122.356	133.449	173.59	131.891	156.223	143.19	140.833	107.426	142.509	116.716	130.62	130.817	104.545	71.7982	116.17	118.847	128.735	90.186	100.675	78.2592	125.074	79.5309	105.929	163.78	147.74	137.389	164.722	128.744	135.347	149.563	110.082	172.074	152.049	153.769
FAM210B	uc002xxc.3	0.141355	0.00588624	24	16.5	17.9025	1	0.825244	24	18	30.2344	N	N		111.91	136.631	133.449	110.905	108.077	123.987	147.809	128.876	148.964	142.509	161.607	147.931	136.697	166.708	150.776	147.447	155.633	190.528	197.908	136.985	192.091	170.045	202.982	156.931	266.142	395.644	300.948	309.108	353.416	297.176	316.723	277.707	323.903	371.904	369.877
RMDN2	uc002rqn.2	0.141355	0.00588624	24	19	17.3538	0.919723	0.398806	24	17.5	8.86625	N	N		55.9552	40.7853	82.6115	48.2194	53.1227	57.0339	43.111	49.1588	52.9967	69.5977	59.2559	47.2119	107.3	39.5578	73.5931	61.0638	90.5502	99.5553	92.6912	90.773	80.0378	77.293	73.5958	86.3121	61.4173	25.0408	43.6156	69.1426	37.866	41.1927	30.7925	42.5317	32.8964	59.5869	43.6372
CPM	uc001sur.3	0.141355	0.00588624	24	16	16.6208	0.919723	0.398806	24	13	14.4134	N	N		116.328	157.023	144.041	139.836	108.077	161.183	123.174	151.462	154.693	164.052	145.446	187.274	204.31	138.452	224.369	165.319	203.738	205.976	157.826	214.554	154.74	202.367	182.802	217.742	105.287	85.1386	122.124	77.277	138.842	97.0971	138.566	102.577	182.195	106.845	149.613
GRAMD4	uc003bhx.3	0.141355	0.00588624	24	18	12.0573	1	1	24	16.5	5.08526	N	N		42.7027	42.8245	50.8378	86.7949	32.9727	34.7163	38.4919	37.2013	60.1585	44.7414	53.869	51.9331	54.3847	45.2089	46.6688	44.6808	84.8909	61.7929	85.1757	59.415	71.1447	68.861	62.9125	60.8108	90.6637	45.0734	56.7003	48.8065	40.3904	52.962	61.5849	65.0485	43.0184	73.9699	70.6506
PSMA1	uc001mll.3	0.156911	0.00727581	24	6.5	322.673	1	1	24	9.5	25.1068	N	N		3162.94	3254.66	3338.35	3011.3	2934.57	3218.7	2905.37	3116.94	2775.88	3030.81	2783.23	3081.36	2782.44	2607.99	2426.78	2633.19	2606.15	2737.77	2314.77	2526.79	2338.88	2602.67	2178.2	2334.35	2175.93	1948.17	2058.66	2137.32	2022.04	2109.65	1869.54	1908.92	2155.98	1999.24	1822.37
FTSJ3	uc002jca.3	0.156911	0.00727581	24	4	149.262	1	1	24	8.5	13.6281	N	N		2012.92	2031.11	1847.11	2054.15	1848.3	1854.84	1658.23	2028.8	1786.13	1854.28	1772.29	1890.05	1740.31	1729.24	1464.68	1724.68	1607.27	1628.93	1598.3	1713.13	1381.99	1744.01	1445.8	1573.23	2117.44	2073.37	2060.84	1992.93	2082.63	2044.92	1948.72	2116.58	2285.04	2044.45	1872.24
BYSL	uc003orl.3	0.156911	0.00727581	24	7	135.105	0.386928	0.110879	24	22	117.628	N	N		1394.46	1704.82	1203.16	1350.14	1511.25	1527.52	1225.58	1569.1	1347.84	1483.09	1483.19	1411.64	1134.73	1401.47	1220.57	1322.55	1134.71	1192.95	1074.72	1305.48	1102.74	1280.25	1082.57	1192.68	1857.14	2085.9	1801.33	1962.43	1729.21	1897.81	1724.38	1681.25	2330.58	1672.54	1674.84
MFSD1	uc003fcl.2	0.156911	0.00727581	24	6	71.9464	1	0.825244	24	12	45.0884	N	N		664.1	699.467	807.051	986.086	703.418	763.758	663.601	655.008	650.284	626.379	603.333	712.9	643.798	686.61	597.72	600.212	625.363	611.063	548.632	551.239	514.02	539.646	513.983	559.067	947.582	1026.67	996.617	1181.52	1088.02	1224.01	1075.54	1188.39	900.856	1288.31	1130.41
MRPS2	uc004cfv.5	0.156911	0.00727581	24	6	70.1084	1	0.45321	24	3	37.5551	N	N		1119.1	1086.93	857.888	988.497	1115.58	939.82	990.013	943.318	1187.41	909.741	1113.29	889.157	846.638	1008.72	825.679	854.893	877.206	853.086	821.695	846.664	795.042	855.844	953.184	859.198	985.602	1372.23	1116.56	998.5	939.076	1085.72	1027.15	1020.76	1148.84	1045.85	864.431
DTYMK	uc002wbz.2	0.156911	0.00727581	24	5	62.7307	0.0182905	0.00071381	24	9.5	39.8279	Y	N		799.571	866.687	826.115	877.593	895.758	892.705	834.505	906.117	880.892	856.714	867.291	738.079	661.436	943.735	737.726	819.148	744.21	717.484	784.117	830.16	754.134	789.794	785.813	768.963	555.681	588.458	575.726	581.611	598.282	612.006	688.432	705.526	589.605	532.173	629.622
NCEH1	uc011bpx.2	0.156911	0.00727581	24	6.5	53.0419	0.315173	0.0806795	24	3	20.1233	N	N		212.041	281.418	167.341	209.754	228.977	285.17	220.174	256.423	169.017	236.963	168.789	228.191	195.491	265.602	127.442	207.021	130.166	161.348	132.774	163.391	120.946	163.018	124.638	145.161	362.655	355.579	250.79	357.915	262.537	300.118	305.725	292.718	296.068	252.731	232.731
SDC1	uc002rdp.1	0.156911	0.00727581	24	7	44.9373	1	1	24	13.5	29.1193	N	N		768.648	783.077	709.611	696.77	987.349	835.671	752.902	716.125	852.245	709.233	741.596	697.162	742.278	825.062	665.928	723.829	732.891	696.887	613.766	567.744	569.158	675.962	586.392	678.727	608.324	758.735	682.585	778.871	734.6	826.796	714.825	880.657	635.154	992.43	733.52
TBL2	uc003tyh.3	0.156911	0.00727581	24	4.5	39.478	1	1	24	16.5	6.08141	N	N		360.764	371.146	419.412	479.783	404.831	436.433	384.919	377.327	399.624	357.931	450.704	406.022	370.404	398.403	312.322	335.106	336.734	345.01	345.713	303.677	297.029	397.708	352.548	411.944	371.429	430.701	405.625	477.897	489.733	461.947	373.909	417.812	420.062	406.835	403.124
MMP15	uc002ena.3	0.156911	0.00727581	24	19	37.948	1	0.825244	24	16	14.4902	N	N		129.581	122.356	139.804	127.781	155.704	119.027	170.904	110.275	226.31	106.054	186.746	116.456	163.154	220.393	222.574	156.383	178.271	185.379	313.146	186.497	302.365	233.284	264.707	231.473	70.1912	100.163	126.485	77.277	85.8295	88.2701	107.774	90.0672	73.3843	106.845	139.223
MGMT	uc001lkh.2	0.156911	0.00727581	24	19	32.9657	1	1	24	12.5	3.46466	N	Y		147.251	138.67	124.976	72.3291	98.9181	101.669	132.412	104.961	133.208	104.396	122.103	103.866	141.106	98.8944	154.366	129.574	161.293	118.436	162.836	163.391	145.847	141.938	157.875	170.663	99.4376	195.318	157.016	136.252	138.842	170.655	140.766	132.599	106.281	133.557	160.003
NCOA2	uc003xyn.1	0.156911	0.00727581	24	19	32.368	1	0.580561	24	20.5	14.3941	N	N		482.982	387.46	402.466	511.125	434.141	386.839	357.205	381.313	444.027	396.044	466.865	420.186	495.342	333.415	436.174	424.468	449.922	466.88	465.961	551.239	546.035	518.566	440.388	460.985	383.127	380.62	407.806	376.217	363.513	391.331	345.316	407.804	361.861	355.467	367.799
DHX33	uc002gca.3	0.156911	0.00727581	24	7	31.9813	1	1	24	8.5	2.12033	N	N		450.587	466.991	466.013	419.509	467.113	481.069	480.379	520.818	486.997	485.527	479.434	435.923	379.223	480.344	355.401	425.957	407.476	357.026	418.363	506.678	396.632	379.438	435.64	464.908	672.666	676.1	604.077	557.208	585.66	712.045	618.049	607.954	700.947	680.112	610.92
BBC3	uc010xyl.2	0.156911	0.00727581	24	16.5	27.9149	1	1	24	15.5	5.8663	N	N		79.5153	101.963	78.375	72.3291	75.1045	96.7097	83.1426	98.3177	137.505	61.3122	116.716	110.161	97.0106	166.708	131.032	141.489	110.358	151.049	162.836	127.082	124.503	109.616	160.249	143.2	163.78	265.432	194.09	250.134	234.769	185.367	239.741	197.647	258.11	267.114	257.667
FOXO1	uc001uxl.4	0.156911	0.00727581	24	15	27.5408	1	1	24	10.5	2.22953	N	N		91.2954	91.7668	129.213	69.9181	71.4408	79.3515	115.476	94.3318	156.126	107.711	154.424	77.1128	148.456	214.742	172.316	132.553	164.122	144.183	147.805	141.936	172.526	144.749	156.688	137.315	70.1912	72.6182	71.9658	44.7393	53.0124	47.0774	41.7898	57.5429	75.9148	47.2586	83.1184
RGMA	uc010urc.2	0.156911	0.00727581	24	15.5	25.6494	1	1	24	7.5	0	N	N		58.9002	63.2171	61.429	57.8633	69.609	54.5542	87.7616	65.1023	111.723	71.2547	87.986	70.8178	74.9627	146.929	116.672	93.8297	107.528	92.6894	90.186	103.976	110.274	111.021	112.768	103.967	146.232	197.822	165.739	178.957	156.513	144.174	160.561	140.105	141.708	205.472	172.471
CMTM8	uc003cex.3	0.156911	0.00727581	24	18	24.7691	1	1	24	16.5	1.68888	N	Y		76.5703	85.649	80.4932	147.069	100.75	74.392	73.9045	71.7453	94.5347	96.111	79.0078	83.4077	102.89	98.8944	77.183	138.51	127.336	118.436	122.753	123.781	112.053	106.805	108.02	139.276	93.5883	80.1304	91.5928	119.983	85.8295	105.924	68.1833	85.0635	91.0977	119.174	95.5861
FBXL17	uc011cvc.2	0.156911	0.00727581	24	20	21.3464	1	0.825244	24	18.5	7.74665	N	Y		229.711	181.494	177.932	202.521	172.191	178.541	161.666	170.063	187.637	195.536	197.52	173.11	170.503	200.614	183.085	214.468	192.419	188.812	235.486	184.847	222.327	244.527	214.852	256.975	128.684	162.765	187.547	180.991	204.476	200.079	151.763	135.101	197.378	158.213	189.094
MRRF	uc010mwa.3	0.156911	0.00727581	24	5	19.1844	1	1	24	17.5	1.6349	N	N		179.646	159.063	137.686	298.96	194.173	195.899	167.825	152.791	184.772	147.481	141.855	169.963	160.214	132.801	96.9275	145.957	158.463	133.885	135.279	132.033	112.053	133.506	122.264	137.315	134.533	152.749	104.678	178.957	133.793	135.347	160.561	160.119	164.482	191.089	130.911
C19orf47	uc002oni.5	0.156911	0.00727581	24	3	17.293	1	1	24	11.5	6.8687	N	Y		192.898	201.887	167.341	241.097	212.491	176.061	189.38	178.035	207.69	190.565	170.585	162.094	164.624	135.627	172.316	162.34	138.655	142.467	175.362	160.09	174.304	206.583	160.249	174.586	152.081	172.781	167.92	168.789	179.232	153.001	125.369	155.116	149.299	131.502	137.145
WDR91	uc003vsp.2	0.156911	0.00727581	24	21	14.1392	1	1	24	6.5	0.488353	N	Y		104.548	83.6098	103.794	89.2059	106.245	86.7907	96.9997	79.7171	77.3466	71.2547	80.8035	77.1128	79.3723	121.499	78.978	90.8509	99.0393	97.8388	127.764	107.277	110.274	91.3463	117.516	98.082	128.684	95.1549	95.9544	95.5795	126.22	97.0971	103.375	87.5653	131.586	92.4624	91.4302
GABPB2	uc001ewr.2	0.156911	0.00727581	24	2	13.5175	1	1	24	11.5	0.228047	N	Y		136.943	85.649	114.385	137.425	91.5908	104.149	96.9997	90.346	95.9671	77.8831	66.4384	107.014	70.5532	53.6855	77.183	93.8297	93.3799	75.5247	77.6602	75.9192	78.2592	88.5356	93.7753	84.3505	32.171	50.0815	50.158	54.9074	35.3416	64.7314	65.9839	62.5467	50.6099	69.8605	54.027
TSHZ1	uc002lly.4	0.156911	0.00727581	24	21	8.92437	1	1	24	6.5	2.73808	N	N		64.7903	48.9423	63.5473	38.5755	84.2636	61.9934	61.5871	53.1447	50.1321	57.998	46.6865	50.3593	49.9752	59.3366	64.6183	75.9574	76.4018	77.2412	62.6292	70.9679	87.1522	84.3196	93.7753	70.619	49.7188	52.5856	47.9772	48.8065	37.866	47.0774	52.7871	42.5317	40.4879	34.9302	64.4168
RPL8	uc003zeb.3	0.171897	0.00895623	24	5	1208.68	0.180872	0.0343842	24	23	266.924	Y	Y		14299.5	16813.7	12095.2	16208.9	15925.8	14995	13786.3	14698.5	14203.1	14169.8	14485.4	14053.4	12252.7	14579.9	11999.3	12865.1	12688.4	12698.4	11851.9	12995.4	11941.6	13309.9	12076.8	13082.2	15076.5	16677.1	14772.6	16693.9	14734.9	14685.2	14699	15213.9	15899.1	14465.2	14310.9
TAGLN2	uc031pqt.1	0.171897	0.00895623	24	5.5	633.64	1	1	24	9.5	33.2066	N	Y		6237.53	7112.95	6494.53	7254.61	7149.58	7597.91	6069.41	7373.83	6902.47	6747.66	6573.81	6878.77	5720.69	7510.32	5810.27	6630.63	5959.34	5980.18	5679.21	6487.79	5693.35	6269.16	6006.37	6512.64	6583.35	6553.17	6745.16	6959	6424.59	6587.89	6352.05	6477.33	6268.03	6589.49	6404.27
SRSF2	uc002jsv.3	0.171897	0.00895623	24	4.5	580.149	0.523766	0.174483	24	13.5	132.604	N	Y		3221.84	4380.34	3211.26	4129.99	4550.23	4099	3886.15	3793.2	4067.86	3693.65	4128.16	3655.77	2732.47	3989.68	2879.11	3078.51	2877.8	3307.64	3043.78	3218.31	2986.3	3722.71	3049.48	3666.3	2111.59	2764.5	2250.57	2470.83	2423.42	2518.64	2744.93	2631.96	3072.02	2716.34	2728.36
NOP56	uc002wgh.3	0.171897	0.00895623	24	5	271.754	1	1	24	7.5	13.4522	N	N		2329.5	2145.3	2067.41	2256.67	2234.82	2199.52	1870.71	2236.06	1962.31	2034.9	1738.17	2023.82	1912.28	1669.9	1669.31	1761.91	1873.26	1767.96	1668.44	1701.58	1494.04	1797.41	1560.94	1683.09	2211.02	1905.6	2104.45	2047.84	1989.23	1868.38	2030.1	1921.43	2247.08	2005.41	1818.21
IMPDH2	uc003cvt.3	0.171897	0.00895623	24	5	269.199	1	1	24	17.5	43.7316	N	Y		5741.3	5371.42	5397.28	5328.24	5623.68	5358.71	5325.74	5356.99	5298.24	5191.65	5334.82	5309.76	5482.57	5066.22	4875.09	5042.97	4940.65	4900.52	4742.28	4787.86	4884.08	4875.08	4562.94	4770.71	5179.53	5210.98	5113.93	5071.81	5331.53	5184.4	5448.07	5216.39	5605.04	5056.67	4847.88
RPS9	uc002qdx.3	0.171897	0.00895623	24	5	190.175	1	1	24	13.5	32.7854	N	Y		1310.53	1625.29	1063.36	1685.27	1447.14	1443.21	1270.23	1355.19	1227.52	1401.9	1346.72	1389.6	1096.51	1234.77	944.146	1219.79	1080.94	1096.82	1004.57	1107.43	965.789	1270.42	959.119	1151.48	1321.94	1577.57	1208.15	1380.82	1168.8	1274.03	1233.9	1090.81	1315.86	1282.15	1203.14
PSMB6	uc002fzb.4	0.171897	0.00895623	24	7.5	167.732	0.636471	0.232515	24	1	30.0192	N	N		2177.84	2328.84	2160.61	2336.23	2557.22	2358.23	2158.63	2298.51	2506.6	2169.13	2442.06	2089.91	2000.48	2387.59	2008.55	2092.55	2127.93	2140.44	1933.99	2011.86	1849.76	2117.83	2050	1971.45	2529.81	2591.72	2313.81	2426.09	2330.02	2592.2	2225.86	2316.73	2287.57	2393.75	2192.25
XPO5	uc003ovp.3	0.171897	0.00895623	24	7	131.158	0.315173	0.0806795	24	4	90.6169	N	N		2470.86	2053.54	2317.36	2030.04	2123.08	2135.05	2189.42	2188.23	1968.04	2266.9	2073.96	2025.39	2028.4	1839.44	1979.83	1794.68	1949.66	1992.82	1876.37	1937.59	1880	1876.11	1696.26	1685.05	2798.88	2917.25	2616.94	2649.79	2696.06	2962.93	2546.98	2444.32	2887.29	2660.86	2641.09
RPS15A	uc002dfh.1	0.171897	0.00895623	24	6	130.01	1	0.45321	24	16.5	23.1413	N	Y		840.801	905.433	872.716	1145.21	782.186	934.86	725.188	968.562	839.354	846.771	764.94	917.484	811.361	819.411	721.571	865.318	591.406	665.99	631.302	793.851	645.638	682.989	659.988	659.111	579.078	533.368	556.099	687.359	646.246	556.101	494.879	575.429	657.928	472.586	554.815
ARL6IP1	uc002dfl.1	0.171897	0.00895623	24	6	121.763	0.00117766	1.18453e-06	24	10.5	160.493	Y	N		1251.63	1048.18	1637.4	1232.01	1445.3	1304.34	1471.93	1377.78	1294.84	1415.15	1305.43	1394.32	1125.91	1251.72	1005.17	1248.08	1165.83	1251.31	1164.9	1062.87	1319.73	1143.94	1251.13	1135.79	652.194	791.288	802.528	833.778	992.088	903.297	1090.93	1018.26	991.953	1084.89	989.109
BEX1	uc004ejt.1	0.171897	0.00895623	24	6	116.379	1	1	24	5.5	1.50901	N	N		765.703	626.054	709.611	607.564	573.359	612.495	543.506	660.323	531.4	546.839	509.96	509.888	586.473	449.263	430.789	470.638	526.323	465.163	440.909	389.498	357.502	392.086	401.216	341.325	526.434	533.368	514.665	585.678	605.855	626.717	497.078	557.916	506.099	556.829	563.127
TMEM2	uc011lsa.1	0.171897	0.00895623	24	18.5	68.3821	1	0.735861	24	20.5	87.8875	N	N		462.367	393.578	487.196	523.18	437.804	411.636	506.554	365.37	472.674	440.785	531.507	443.792	643.798	437.961	547.461	503.404	602.725	525.24	656.354	518.231	759.47	536.835	597.075	588.492	1181.55	1056.72	959.544	1140.85	881.015	915.066	802.804	785.586	1090.64	969.828	881.055
PPP2CA	uc003kze.3	0.171897	0.00895623	24	3	64.8811	1	0.513638	24	4.5	54.3993	N	N		1924.57	1759.88	1817.45	1670.8	1853.8	1611.83	1579.71	1591.68	1614.25	1662.06	1643	1575.3	1556.58	1322.36	1511.35	1481.91	1573.31	1561.99	1390.37	1518.38	1522.5	1616.13	1404.25	1441.8	1506.19	1389.76	1480.75	1649.25	1587.85	1627.11	1381.26	1451.08	1649.88	1465.02	1352.75
GAS6	uc001vud.3	0.171897	0.00895623	24	18	61.2093	1	1	24	12.5	3.95339	N	N		184.063	289.575	256.307	185.645	267.445	213.257	274.063	228.522	306.522	233.649	281.914	276.976	314.55	313.636	353.606	320.212	240.524	274.635	438.404	396.1	446.433	347.116	419.021	439.407	216.423	187.806	172.282	227.764	179.232	214.791	171.558	185.138	182.195	170.542	218.186
RNF214	uc001pqt.4	0.171897	0.00895623	24	5	41.0493	1	1	24	12.5	3.01273	N	Y		325.424	324.243	360.101	397.81	393.841	275.251	311.015	366.698	326.575	326.446	278.323	297.435	248.406	271.253	332.066	324.68	257.502	281.501	205.424	262.416	275.686	259.986	278.952	260.898	236.895	222.863	252.971	237.932	227.196	220.675	217.747	182.636	232.805	256.84	224.42
TAF9B	uc004eda.3	0.171897	0.00895623	24	4	40.97	0.919723	0.398806	24	9	32.9126	N	Y		586.057	503.698	650.301	585.866	547.713	530.663	602.014	532.776	561.479	536.896	588.968	550.805	549.727	466.216	484.638	478.085	449.922	484.045	503.539	500.076	549.593	475.001	519.919	488.448	467.942	363.091	527.749	522.637	525.075	526.678	490.48	487.864	536.465	503.406	436.372
TIMM21	uc010dqr.1	0.171897	0.00895623	24	7	40.6664	0.636471	0.232515	24	7	43.3436	N	N		429.972	479.227	457.541	462.906	404.831	456.271	371.062	512.846	422.542	508.726	373.492	503.593	336.597	358.845	333.861	403.617	365.031	399.938	280.579	371.344	288.136	369.601	311.002	307.977	608.324	468.262	593.173	656.855	610.904	485.485	481.682	557.916	622.501	571.212	430.138
UBXN11	uc001blw.3	0.171897	0.00895623	24	6	36.7765	1	1	24	8.5	5.41927	N	Y		98.6579	169.259	150.395	120.548	201.5	188.46	133.952	189.992	124.614	159.08	120.307	166.815	86.7216	127.15	89.7477	144.468	116.018	130.452	70.1447	95.7242	97.8239	129.29	99.7104	100.044	198.875	242.895	157.016	229.797	174.183	158.886	200.151	217.662	182.195	186.98	178.705
ABCF3	uc003fmz.2	0.171897	0.00895623	24	5	32.9762	1	1	24	6.5	9.75297	N	N		594.892	634.211	527.443	443.618	617.322	667.049	554.284	635.079	615.908	616.436	610.515	572.838	548.257	587.715	506.177	570.425	495.197	550.987	508.549	551.239	538.921	550.888	582.831	570.837	813.049	786.28	861.409	878.518	782.563	891.528	736.82	775.579	857.837	819.833	820.794
XBP1	uc021wnp.1	0.171897	0.00895623	24	16.5	32.1339	1	1	24	13.5	11.0992	N	N		630.232	562.837	550.743	508.714	622.818	523.224	649.744	564.662	631.664	565.067	615.902	609.033	643.798	632.924	687.467	641.914	673.467	672.856	651.343	625.508	741.683	647.856	712.217	682.65	429.921	580.946	473.23	498.233	451.867	473.716	514.674	450.336	533.934	503.406	527.802
HMBOX1	uc011lay.2	0.171897	0.00895623	24	17	29.1617	1	1	24	11.5	3.80074	N	N		89.8229	77.492	124.976	57.8633	62.2818	91.7502	92.3807	82.3743	73.0496	124.282	102.351	99.145	111.709	56.5111	166.931	131.064	138.655	115.003	162.836	136.985	165.411	103.994	131.76	117.698	67.2666	60.0978	71.9658	63.0418	75.7319	76.5007	85.779	82.5616	96.1587	92.4624	91.4302
EIF2AK3	uc002stc.4	0.171897	0.00895623	24	20	22.6594	0.386928	0.110879	24	10	14.0155	N	N		232.656	167.22	196.997	219.398	183.182	190.94	153.968	183.349	171.881	172.337	186.746	163.668	219.009	180.835	215.394	202.553	229.205	226.574	202.919	231.058	209.877	192.53	238.593	202.049	222.272	237.887	207.174	185.058	224.671	223.618	246.34	195.146	237.866	267.114	199.484
SLC7A10	uc002num.2	0.171897	0.00895623	24	19	20.0734	1	0.735861	24	15.5	6.32778	N	N		60.3727	59.1386	59.3108	69.9181	51.2909	57.0339	55.4284	49.1588	71.6172	82.8544	82.5991	58.228	54.3847	79.1155	78.978	46.1702	79.2315	99.5553	85.1757	94.0738	90.7095	101.184	98.5234	88.2738	26.3217	32.553	21.8078	20.3361	27.7684	44.135	26.3935	67.5504	43.0184	24.6566	54.027
RECK	uc003zyv.3	0.171897	0.00895623	24	16.5	19.8727	0.579956	0.201719	24	7	9.95093	N	N		117.8	148.866	156.75	120.548	119.068	126.466	152.428	147.477	160.423	130.91	165.198	163.668	176.383	129.975	208.215	148.936	200.908	173.363	167.846	148.538	206.32	186.909	170.932	141.238	140.382	102.667	126.485	117.949	143.891	129.463	109.973	127.595	121.464	149.995	130.911
GABRA5	uc001zbd.2	0.171897	0.00895623	24	4	14.6026	0.840422	0.349965	24	2	5.42801	N	N		131.053	91.7668	80.4932	91.6168	102.582	104.149	76.9839	55.8019	67.3202	77.8831	53.869	64.5229	66.1436	31.0811	62.8234	53.617	62.2533	51.4941	65.1343	56.1142	55.1371	67.4557	33.2368	52.9643	114.061	102.667	126.485	115.916	98.4515	141.232	125.369	112.584	75.9148	117.119	89.3523
KIAA0146	uc003xqd.3	0.171897	0.00895623	24	19	14.4631	1	1	24	15.5	0.158019	N	N		285.666	324.243	319.855	325.481	254.623	287.649	277.142	305.582	283.604	313.189	299.871	286.419	321.899	361.671	364.376	293.404	322.585	305.532	360.744	351.539	345.052	326.036	306.253	370.75	307.087	215.351	233.344	270.47	249.915	270.695	263.935	280.209	212.561	291.77	288.836
RHPN1	uc003yyb.3	0.171897	0.00895623	24	19.5	11.5856	1	1	24	14.5	4.7037	N	N		33.8676	53.0208	36.0101	24.1097	36.6363	44.6352	29.2539	38.5299	40.1056	41.4272	44.8908	31.4746	32.3369	70.6389	48.4638	49.1489	39.6157	56.6435	60.124	54.4638	72.9233	61.8344	52.2293	58.8492	61.4173	57.5937	32.7117	42.7057	68.1587	55.9044	68.1833	57.5429	63.2623	63.6963	78.9625
GLI1	uc001snx.3	0.171897	0.00895623	24	19	11.0628	1	0.735861	24	18.5	4.62642	N	N		54.4827	50.9816	50.8378	28.9316	71.4408	42.1555	61.5871	41.1871	47.2674	31.4847	34.117	48.7856	44.0957	90.4177	55.6436	61.0638	50.9345	82.3906	82.6705	75.9192	71.1447	56.2131	62.9125	72.5806	43.8695	50.0815	15.2655	30.5041	40.3904	29.4234	28.593	37.528	25.3049	41.0944	41.5592
SAR1B	uc003kzq.3	0.171897	0.00895623	24	2	10.7389	1	1	24	6.5	14.3562	N	Y		586.057	483.305	499.905	518.358	448.795	446.352	440.348	491.588	373.842	482.212	348.353	443.792	433.608	327.764	394.89	418.51	430.114	444.566	438.404	472.019	361.059	420.193	382.223	441.369	649.269	480.783	567.003	559.242	588.185	494.312	536.669	500.373	592.135	519.844	475.853
SLX4	uc002cvp.2	0.171897	0.00895623	24	6.5	7.49708	1	1	24	16.5	1.3124	N	N		163.448	185.573	177.932	231.453	185.013	213.257	198.618	217.893	184.772	198.85	177.768	184.126	136.697	192.138	186.675	177.234	189.59	137.318	170.351	151.838	176.083	174.261	151.94	176.548	149.156	142.732	139.57	162.688	123.695	164.771	136.367	157.618	149.299	145.885	162.081
HSP90AB1	uc003oxb.2	0.185024	0.0109801	24	4	1730.33	1	0.923131	24	5	667.488	N	Y		23208.2	20510.9	23573.9	21944.6	21763.8	21258.8	20195.9	21893	20219	21611.7	20457.6	21221.7	20733.8	18202.2	17989	20088.5	18800.5	19784	18017.2	20153.2	17032	18811.7	17208.4	17990.2	25087.5	23335.5	22603.8	22975.7	24251.9	23014.9	22764.4	22942.1	25120.2	24689.5	22423.3
EEF2	uc002lze.3	0.185024	0.0109801	24	4.5	1491.55	0.0405356	0.00303752	24	20	1366.61	Y	N		20719.6	23082.4	17354.8	21857.8	22417.8	20978.6	19443	20394.3	20519.8	19759.1	20701.9	19596.1	18427.6	20061.4	17132.8	18149.3	17977.1	18469.2	17548.7	18339.4	17937.4	18867.9	17628.6	18755.2	25257.1	27950.5	23598.2	28232.5	24504.3	24865.7	23760.8	23297.4	27207.9	24745	23397.8
RPL37A	uc002vgf.3	0.185024	0.0109801	24	5	1143.65	0.20269	0.0410599	24	21	360.06	N	N		6833.9	7932.73	5390.93	8599.93	6720.94	7228.43	5836.92	7218.38	5693.57	6847.08	5729.86	6891.36	5744.2	5814.99	4772.78	5516.59	5376.42	5549.35	4539.36	5726.95	4786.26	5631.15	4672.15	5053.18	5922.39	5574.07	5901.2	6871.55	5765.72	5781.69	5516.25	5266.43	6695.68	5523.09	5070.22
RPL27	uc002icj.3	0.185024	0.0109801	24	5	735.78	1	0.654469	24	12	197.748	N	Y		6505.53	5913.86	5717.14	5675.42	6440.67	5834.82	5442.76	5237.41	5464.39	5067.37	5347.39	4908.46	5823.58	4817.57	4706.37	4339.99	5079.3	4716.86	4153.57	4495.74	4578.16	4527.96	4255.5	4184.18	6355.23	6295.25	6662.29	7373.85	6553.34	6740.89	6248.67	6009.48	6713.4	5765.55	5581.4
EIF3B	uc003sly.3	0.185024	0.0109801	24	5.5	691.524	0.282531	0.0684872	24	2	329.043	N	N	A	6673.4	6972.24	6469.11	6813.4	6572.56	6846.55	6089.42	7213.06	6190.59	6731.09	5920.2	6756.02	5728.04	5978.87	5350.76	6158.5	5599.97	5889.21	5446.23	6037.23	5392.77	6079.44	5259.72	5594.59	8282.57	8303.52	7610.93	8138.49	7802.91	7385.26	7605.74	7600.67	8135.54	7390.83	6836.49
PRDX5	uc001nzu.3	0.185024	0.0109801	24	17	203.278	0.20269	0.0410599	24	18	88.5594	N	N		1607.98	1684.43	1597.16	1786.53	1751.22	1753.17	1842.99	1752.45	2075.47	1764.8	2030.86	1893.2	1951.97	1910.07	2125.23	2080.64	2034.55	1967.07	2445.04	2011.86	2194.81	2068.64	2337.26	2081.3	2240.27	2376.37	2091.37	2208.5	2052.34	2389.18	2162.07	2226.66	2166.1	2251.97	2491.47
PABPC4	uc001cdl.2	0.185024	0.0109801	24	5	156.85	1	1	24	12.5	7.57626	N	N		1493.12	1421.37	1258.24	1494.8	1357.38	1378.73	1228.66	1364.49	1165.93	1353.84	1262.33	1274.72	1212.63	1342.14	1055.43	1160.21	1131.88	1196.38	979.52	1251.02	1017.37	1197.34	1035.09	1125.98	1152.31	1056.72	1125.28	1240.5	1153.65	1082.78	1082.14	1063.29	1138.72	1012.98	1026.51
ITGB5	uc003eho.3	0.185024	0.0109801	24	19	145.271	0.386928	0.110879	24	21	93.056	N	Y		1571.16	1939.34	1552.67	1897.43	1608.34	2011.06	1815.28	1969.01	1892.13	1887.42	1887.21	2033.26	1856.43	2280.22	2071.38	2125.32	1921.36	2047.75	2179.5	2457.47	2415.36	2393.27	2248.23	2434.39	2617.55	2827.1	2658.37	2611.15	2612.75	2636.33	2542.58	2519.38	2515.31	2636.21	2830.18
SERINC1	uc003pyy.1	0.185024	0.0109801	24	18	133.989	1	1	24	7.5	19.0555	N	N		1714	1513.13	1940.31	1530.97	1417.83	1440.73	1695.18	1397.71	1526.88	1479.78	1490.38	1605.2	1784.41	1613.39	1694.44	1595.1	1720.45	1752.52	1723.56	1637.21	1826.64	1697.64	1639.29	1596.77	1257.59	1244.53	1371.71	1454.03	1353.08	1365.24	1141.52	1303.47	1503.11	1331.46	1263.4
AGFG1	uc002vpd.2	0.185024	0.0109801	24	5	112.215	0.6955	0.267231	24	3	48.3646	N	Y		1026.34	1135.87	982.865	949.922	1176.03	1115.88	1099.33	1098.77	1095.74	1088.71	1046.85	993.023	926.01	1059.58	852.603	1008.3	908.332	1076.23	924.407	981.998	937.331	1017.46	871.279	927.855	1093.81	1144.36	1070.76	1126.62	1014.81	1203.42	1104.13	1050.78	1088.11	1140.37	1009.89
NOP16	uc003mee.4	0.185024	0.0109801	24	5.5	106.217	0.840422	0.349965	24	20	52.9757	N	N		640.54	952.336	648.182	810.086	745.549	833.191	699.014	795.842	688.958	709.233	682.34	841.945	609.991	760.074	522.332	673.191	526.323	587.033	586.209	650.264	528.249	594.453	504.487	580.645	944.657	876.427	863.59	884.618	853.246	844.45	859.99	825.616	1062.81	789.013	797.937
GUSB	uc003tun.3	0.185024	0.0109801	24	18	95.791	1	1	24	9.5	9.17888	N	N		848.163	999.239	881.189	880.004	1036.81	974.536	1068.54	938.004	1151.6	1034.02	1077.38	959.975	1075.94	1003.07	1213.39	1096.17	1134.71	1103.69	1162.4	1178.4	1303.73	1134.1	1194.15	1133.83	748.707	1009.14	957.363	866.316	1027.43	1023.93	998.556	908.178	979.301	939.007	953.784
GEMIN5	uc003lvx.3	0.185024	0.0109801	24	5	95.6634	1	1	24	13.5	10.8287	N	Y		1167.7	1070.61	1027.35	1053.59	1095.43	1016.69	1056.22	1016.39	989.75	1025.74	966.05	1090.59	992.154	918.305	917.221	965.105	913.992	942.342	894.345	983.649	921.324	899.409	878.401	916.085	1345.33	1502.45	1354.27	1260.84	1302.59	1259.32	1130.52	1230.92	1399.36	1284.2	1234.31
SPTAN1	uc004bvm.4	0.185024	0.0109801	24	17.5	61.0438	0.636471	0.232515	24	16	177.497	N	N		307.754	275.3	239.361	349.591	245.463	277.73	294.078	285.653	316.548	333.075	285.506	374.548	380.693	299.509	387.71	360.425	356.542	324.413	458.446	396.1	384.181	299.335	381.036	400.174	976.828	828.849	830.878	1049.34	838.1	918.009	892.982	1123.34	1022.32	1403.37	1315.35
LOC151760	uc003dxs.1	0.185024	0.0109801	24	19	57.9899	0.349865	0.0947331	24	17	99.2264	N	N		332.786	405.813	355.865	405.043	359.036	448.832	349.507	491.588	299.36	478.898	330.396	461.103	499.752	437.961	486.433	397.659	472.559	538.972	521.075	575.996	569.158	519.971	492.617	574.76	646.344	648.556	667.319	662.955	626.051	726.757	633.445	755.564	604.788	791.067	820.794
MYO7B	uc002top.3	0.185024	0.0109801	24	6	50.7671	1	1	24	15.5	9.14061	N	N		276.831	352.792	207.588	253.152	283.932	349.643	187.841	277.681	220.581	261.82	217.272	254.944	191.081	245.823	156.161	168.298	186.76	195.678	167.846	166.692	149.404	189.719	117.516	164.778	426.997	523.352	442.699	536.872	436.721	464.889	448.69	532.898	420.062	610.252	579.751
OSBPL9	uc001csu.3	0.185024	0.0109801	24	17	48.6249	0.0519784	0.00474194	24	6.5	32.3005	Y	N		767.175	723.938	870.598	634.085	736.39	694.326	820.648	754.655	763.44	745.689	757.757	756.964	798.133	641.401	886.707	798.297	846.079	892.564	871.798	807.054	988.911	808.063	782.252	855.275	669.741	648.556	693.489	705.661	694.209	703.218	673.035	695.519	614.91	669.839	667.025
F2RL1	uc003keo.3	0.185024	0.0109801	24	17.5	48.3331	0.226258	0.0488609	24	4	32.6737	N	N		288.611	348.714	258.426	229.042	245.463	230.615	257.126	281.667	270.713	250.22	326.805	258.092	327.778	339.066	332.066	260.638	418.795	320.98	378.28	252.514	350.388	338.684	328.807	353.095	365.579	330.538	405.625	341.646	378.66	403.1	327.72	357.767	402.348	336.974	338.707
MRPL27	uc002iqq.3	0.185024	0.0109801	24	6.5	46.7294	1	1	24	13.5	3.65246	N	N		752.45	768.802	768.922	749.811	826.149	681.927	751.363	761.298	847.948	725.804	822.4	788.439	737.869	748.772	656.953	653.829	704.594	684.872	708.962	665.118	688.325	682.989	706.282	743.461	775.028	766.247	719.658	756.501	787.612	841.508	745.618	740.553	721.191	659.565	745.988
TFIP11	uc003acr.2	0.185024	0.0109801	24	5	45.7652	1	0.513638	24	8	43.6511	N	N		1373.85	1349.99	1383.21	1482.75	1489.27	1468	1262.54	1581.05	1279.08	1340.58	1249.76	1457.27	1330.22	1395.82	1304.93	1303.19	1230.92	1247.87	1290.16	1305.48	1309.06	1316.79	1246.38	1247.6	1646.57	1697.76	1644.31	1901.42	1736.79	1712.44	1730.98	1506.12	1956.07	1863.63	1722.63
PTPRK	uc011ebu.2	0.185024	0.0109801	24	19	45.7299	0.840422	0.349965	24	2	25.9127	N	N		667.045	611.779	595.226	518.358	562.368	642.251	617.411	644.38	604.449	654.549	588.968	714.473	655.557	610.32	682.082	637.446	713.083	760.396	648.838	835.111	775.477	767.309	640.996	674.804	1058.72	1079.26	1101.29	1108.32	994.613	938.605	954.567	963.219	860.368	1066.4	984.953
SAFB2	uc002mcd.3	0.185024	0.0109801	24	3	42.0658	0.282531	0.0684872	24	6	27.5227	N	Y		600.782	511.855	518.97	441.207	501.918	493.467	477.3	503.546	405.353	437.471	405.813	464.25	411.56	477.519	339.246	428.936	302.777	439.416	405.837	419.206	378.845	431.435	411.899	449.215	552.756	616.003	532.111	703.628	583.136	529.62	591.655	535.4	544.056	608.197	500.788
C2CD5	uc010sit.2	0.185024	0.0109801	24	4	41.547	0.919723	0.398806	24	6.5	11.9196	N	Y		304.809	242.672	347.392	330.303	289.427	257.892	250.967	309.568	267.848	285.019	219.067	242.354	252.816	211.917	260.268	218.936	195.249	252.321	225.465	216.205	265.014	206.583	213.665	245.205	242.745	220.359	252.971	209.461	214.574	232.445	268.334	242.681	199.909	230.129	203.64
HENMT1	uc001dvu.4	0.185024	0.0109801	24	7	39.5298	1	1	24	6.5	11.1313	N	N		397.577	389.499	485.078	308.604	403	399.237	401.856	437.115	325.142	463.984	348.353	398.154	380.693	364.496	350.016	387.234	314.096	391.355	310.641	328.433	257.9	334.468	332.368	309.939	400.675	408.164	399.083	392.486	454.392	364.85	395.903	375.28	389.696	406.835	334.552
PPP6R1	uc002qjv.3	0.185024	0.0109801	24	4	35.2219	0.919723	0.398806	24	4	35.3948	N	Y		487.399	524.091	413.057	479.783	599.004	530.663	421.872	459.702	459.783	419.243	492.003	437.497	389.512	559.46	409.249	352.978	328.245	427.401	405.837	366.393	412.639	446.894	397.655	451.177	658.043	743.711	623.704	667.023	618.477	744.411	657.639	612.957	607.318	645.182	552.737
TMEM41B	uc001mhn.2	0.185024	0.0109801	24	18	34.684	0.919723	0.398806	24	10.5	15.1916	N	Y		394.632	342.596	351.628	308.604	322.4	391.798	318.713	338.797	266.416	351.302	319.623	341.499	399.801	395.578	357.196	364.893	421.625	411.953	365.754	387.848	455.326	390.681	335.929	360.942	380.203	318.018	331.479	333.511	371.086	423.696	402.502	352.763	425.123	404.78	450.917
ASL	uc003tup.3	0.185024	0.0109801	24	3	33.7691	0.254232	0.0579452	24	2	0	N	N		450.587	491.462	402.466	388.166	512.909	456.271	448.046	410.543	495.591	357.931	387.857	385.564	329.248	372.973	402.07	357.446	367.86	374.19	400.827	384.547	432.204	366.79	394.094	429.599	877.391	1094.28	948.64	921.223	835.576	850.335	778.61	800.597	979.301	889.694	860.275
C22orf29	uc002zqg.3	0.185024	0.0109801	24	4	33.2156	1	1	24	6.5	5.91473	N	Y		291.556	342.596	266.899	332.714	291.259	404.197	263.285	361.384	316.548	328.103	290.893	308.451	239.587	279.73	238.729	269.574	212.227	279.785	225.465	247.563	313.037	306.361	257.585	337.402	330.484	350.571	338.021	300.974	333.221	314.83	356.313	332.748	354.269	382.178	320.006
TMX4	uc002wmx.1	0.185024	0.0109801	24	17	32.4974	0.386928	0.110879	24	7	20.6369	N	Y		198.788	250.829	180.051	171.179	212.491	257.892	221.714	167.406	234.904	208.793	226.25	214.027	264.574	234.521	265.653	306.808	234.865	276.352	240.496	240.961	305.922	259.986	259.959	243.243	231.046	202.83	226.801	213.529	169.135	205.963	228.744	272.703	245.458	310.263	184.938
MAP2	uc002vde.1	0.185024	0.0109801	24	22	31.843	1	1	24	5.5	2.18186	N	Y		365.181	320.164	353.747	409.865	272.941	347.163	306.396	288.31	259.254	333.075	272.936	313.172	310.14	262.777	308.732	271.063	331.074	357.026	345.713	331.734	353.945	368.196	353.735	345.248	163.78	145.236	157.016	166.756	151.464	144.174	142.965	135.101	96.1587	164.378	164.159
SPAG1	uc003yji.2	0.185024	0.0109801	24	3	28.8744	1	1	24	13.5	0	N	N		312.171	250.829	211.824	270.029	183.182	188.46	169.365	199.293	143.234	188.908	149.038	157.373	173.443	127.15	166.931	201.064	132.996	144.183	140.289	145.237	147.625	161.613	150.753	170.663	204.724	165.269	143.932	225.73	161.561	161.828	178.156	185.138	179.665	203.417	147.535
KIAA0355	uc002nvd.4	0.185024	0.0109801	24	16	26.1458	1	1	24	16.5	2.64593	N	N		138.416	134.591	108.03	108.494	122.732	128.946	147.809	132.862	180.475	147.481	149.038	201.437	202.84	175.184	179.495	140	198.079	169.931	180.372	201.351	152.961	178.477	210.104	184.394	93.5883	77.6263	102.497	79.3106	63.1099	67.6737	68.1833	92.5691	111.342	113.01	78.9625
QSOX2	uc010nbi.2	0.185024	0.0109801	24	4	24.1429	0.20269	0.0410599	24	7	32.5108	N	N		736.253	840.176	766.804	761.866	877.44	706.724	680.537	762.626	724.766	722.49	739.801	695.588	649.677	706.389	622.849	697.02	574.428	664.274	723.993	717.932	674.096	704.069	604.198	688.535	1184.48	1254.54	1256.13	1049.34	1085.49	1044.53	1033.75	1168.37	1108.36	1072.56	991.187
ARRDC1	uc004cnp.2	0.185024	0.0109801	24	19.5	22.8601	0.6955	0.267231	24	22	12.9173	N	N		107.493	140.709	103.794	122.959	93.4226	131.426	115.476	99.6463	104.561	120.967	95.1685	129.046	102.89	163.882	100.517	150.425	130.166	140.751	147.805	155.139	167.19	151.775	129.386	172.624	84.8144	175.285	146.112	124.05	143.891	126.52	90.178	97.5728	123.994	123.283	124.678
GDPD5	uc001owo.4	0.185024	0.0109801	24	8	19.2422	1	1	24	11.5	4.71497	N	N		232.656	238.594	163.105	173.59	269.277	235.575	221.714	205.936	227.743	233.649	188.541	231.338	176.383	194.963	184.88	178.723	186.76	209.409	157.826	163.391	144.068	155.991	154.314	180.471	228.122	252.912	187.547	256.234	227.196	264.81	164.96	247.685	227.744	213.691	259.745
EIF5A2	uc003fhd.3	0.185024	0.0109801	24	10	17.1612	1	1	24	9.5	5.40962	N	N	CAY	78.0428	93.8061	101.676	62.6852	87.9272	81.8313	118.555	118.247	101.696	112.682	127.49	113.309	85.2517	93.2433	102.312	75.9574	130.166	125.302	75.155	72.6184	80.0378	73.077	72.4088	68.6574	181.327	112.683	170.101	144.386	174.183	173.598	138.566	157.618	240.397	137.666	128.834
ZNF32	uc001jbb.3	0.185024	0.0109801	24	14	15.1759	1	0.923131	24	14.5	9.95564	N	N		133.998	130.513	122.858	106.083	109.909	138.865	129.333	138.176	160.423	150.795	152.629	157.373	180.792	115.848	154.366	131.064	169.782	168.214	140.289	128.733	151.182	141.938	122.264	137.315	125.759	147.74	106.858	138.285	136.317	135.347	158.361	155.116	103.75	152.049	174.549
SLC25A28	uc001kpx.2	0.185024	0.0109801	24	4	14.611	1	0.735861	24	6	12.3357	N	Y		150.196	165.18	150.395	207.343	144.714	185.98	153.968	136.848	117.452	145.824	177.768	127.472	126.408	129.975	123.852	138.51	104.699	128.735	117.743	123.781	122.725	150.37	137.695	127.507	146.232	192.814	154.836	134.218	100.976	129.463	153.962	127.595	159.421	182.87	103.898
C2orf68	uc002sqc.2	0.185024	0.0109801	24	21	13.1288	1	1	24	13.5	5.62469	N	Y		159.031	128.474	112.267	103.672	128.227	146.304	146.269	100.975	147.531	91.1398	140.059	94.4238	99.9503	127.15	152.571	131.064	166.952	133.885	147.805	132.033	167.19	157.397	162.623	154.969	73.1159	70.1141	106.858	85.4114	53.0124	44.135	61.5849	62.5467	75.9148	61.6416	60.2608
C11orf80	uc021qmd.1	0.185024	0.0109801	24	21	13.0298	1	1	24	8.5	0	N	Y		120.745	148.866	167.341	144.658	137.386	136.385	137.031	147.477	118.885	130.91	131.081	136.914	120.528	189.312	177.7	145.957	169.782	137.318	147.805	146.887	190.312	181.287	150.753	160.854	137.458	187.806	137.389	122.016	133.793	173.598	178.156	142.606	131.586	137.666	149.613
HSPB2	uc001pmg.2	0.185024	0.0109801	24	12	11.9266	1	1	24	13.5	1.17176	N	Y		38.2851	28.5497	40.2466	43.3974	58.6181	44.6352	60.0474	47.8302	65.8878	76.226	61.0515	36.1958	60.2642	73.4644	66.4133	64.0425	56.5939	42.9118	45.093	34.6588	46.244	57.6184	56.9774	41.1944	32.171	50.0815	32.7117	34.5713	58.0612	38.2504	54.9866	27.5205	35.4269	24.6566	33.2474
ZBTB43	uc004bql.3	0.185024	0.0109801	24	2	9.6256	1	1	24	10.5	1.00348	N	Y		101.603	110.12	114.385	183.234	133.723	109.108	120.095	107.618	107.426	101.082	84.3947	92.85	117.589	84.7666	93.3376	86.3829	84.8909	78.9576	105.217	117.18	112.053	105.4	127.012	103.967	96.513	140.228	106.858	119.983	80.7807	102.982	83.5796	107.58	103.75	108.9	93.5082
USP51	uc004dun.2	0.185024	0.0109801	24	4	9.32141	1	0.45321	24	5	7.60017	N	Y		66.2628	55.0601	63.5473	57.8633	69.609	59.5136	50.8094	57.1306	51.5644	51.3697	39.5039	51.9331	54.3847	62.1622	39.489	44.6808	53.7642	37.7623	27.5568	41.2604	44.4654	51.9971	48.6682	64.7341	78.9651	82.6345	69.785	65.0754	73.2075	97.0971	59.3855	67.5504	53.1404	90.4077	49.871
SEPT3	uc003bbr.4	0.185024	0.0109801	24	13	5.44411	1	0.923131	24	5	0.252278	N	N		36.8126	34.6675	42.3649	38.5755	43.9636	54.5542	64.6665	45.173	58.7261	82.8544	50.2777	47.2119	74.9627	76.29	73.5931	58.085	62.2533	63.5094	57.6188	57.7646	71.1447	59.0237	56.9774	66.6957	52.6434	60.0978	74.1466	79.3106	78.2563	58.8467	87.9785	57.5429	70.8538	61.6416	83.1184
[truncated: 13 more columns]
