# Supplementary material for: Ribosome profiling reveals an important role for translational control in circadian gene expression
Source: HighWire-hosted journal article supplement (doi:10.1101/gr.191296.115), 2015-09-03
Supplement: Supplemental_Table_S5.xlsx [file Supplemental_Table_S5.xlsx]

## Sheet: Table_S5
Supplementary Table S5: RNA cyclers.
Genes that oscillate in the RNA data with a statistical cutoff of FDR < 0.05. Gene symbol, JTK cycling statistics, circadian period, peak phase (LAG), amplitude, indicator columns for genes phase-shifted in the siARNTL data and RNA-only cyclers, clock factors binding gene promoters (C = CLOCK; A = ARNTL; Y = CRY1), and normalized RNA read counts for both replicates are indicated. This table lists…
Gene_Symbol	WT.FDR	WT.ADJP	WT.PER	WT.LAG	WT.AMP	KD.FDR	KD.ADJP	KD.PER	KD.LAG	KD.AMP	Shifted_in_KD	RNA_only_osc	ChIP_binding_site	WT.CT00_rep1	WT.CT00_rep2	WT.CT02_rep1	WT.CT02_rep2	WT.CT04_rep1	WT.CT04_rep2	WT.CT06_rep1	WT.CT06_rep2	WT.CT08_rep1	WT.CT08_rep2	WT.CT10_rep1	WT.CT10_rep2	WT.CT12_rep1	WT.CT12_rep2	WT.CT14_rep1	WT.CT14_rep2	WT.CT16_rep1	WT.CT16_rep2	WT.CT18_rep1	WT.CT18_rep2	WT.CT20_rep1	WT.CT20_rep2	WT.CT22_rep1	WT.CT22_rep2	KD.CT00_rep1	KD.CT00_rep2	KD.CT02_rep1	KD.CT02_rep2	KD.CT04_rep1	KD.CT04_rep2	KD.CT06_rep1	KD.CT06_rep2	KD.CT08_rep1	KD.CT08_rep2	KD.CT10_rep1	KD.CT10_rep2
ARNTL	1.12387e-07	1.13043e-11	24	21	113.881	1	1	24	15.5	1.04254	N	N		334.24	320.786	254.973	245.957	174.441	172.737	129.039	128.378	106.625	138.4	127.831	175.207	172.028	212.463	216.066	237.738	310.893	304.173	329.672	339.621	349.69	357.035	342.579	323.96	39.8861	35.0398	32.7911	32.5486	34.0282	28.5739	33.8176	45.5378	32.203	35.5481	37.4274	32.1824
CRY1	2.38934e-05	7.20985e-09	24	12	55.5927	0.0738391	0.0238555	24	1	22.467	N	N	CAY	271.006	299.3	301.761	313.252	365.583	351.643	406.772	364.441	425.144	411.928	452.008	416.916	480.493	408.547	458.025	392.544	414.689	382.414	400.497	364.091	362.414	345.805	317.3	312.653	458.963	496.09	447.998	452.808	451.528	418.009	426.764	460.172	437.424	418.374	384.522	387.721
EIF5A2	8.4501e-05	3.39976e-08	24	8	32.724	1	1	24	8.5	5.50851	N	N	CAY	166.045	222.352	228.789	222.736	244.031	242.97	248.678	228.04	262.496	256.695	240.949	254.498	227.888	223.694	205.029	227.106	204.117	196.042	179.358	193.647	155.759	193.725	169.982	185.331	345.861	354.547	319.492	356.12	328.067	341.966	336.706	322.6	420.786	329.959	348.431	359.625
SSBP2	0.000233469	1.40898e-07	24	17	30.3813	1	1	24	13.5	1.18102	N	N		209.922	185.376	211.189	192.406	208.308	190.77	209.795	216.638	224.093	216.952	244.167	220.395	247.167	233.99	257.241	262.405	266.692	271.646	259.355	264.525	247.46	255.025	227.079	276.767	101.628	97.2815	117.871	120.621	130.005	123.513	122.037	127.027	82.1176	109.379	124.312	127.197
PER2	0.000313343	2.2062e-07	24	9	44.9376	0.0964854	0.0343842	24	17	21.0976	N	N	CAY	37.8547	57.4617	77.2644	78.1944	131.758	120.536	185.013	150.76	206.473	161.779	174.274	157.303	134.459	151.158	112.914	113.553	85.421	104.175	58.597	81.8466	56.5998	76.2735	82.8118	83.5709	180.853	170.127	183.01	197.685	172.322	182.965	176.072	165.854	252.793	195.97	203.177	170.107
CDKN3	0.000377131	3.41398e-07	24	7	110.664	0.000675601	1.10086e-05	24	12	145.001	Y	N		1583.88	1579.45	1801.98	1607.01	1807.96	1633.41	1897.98	1665.11	1864.58	1740.76	1751.02	1619.07	1734.62	1549.01	1600.75	1557.84	1514.73	1513.39	1508.23	1459.74	1546.18	1455.28	1565.14	1475.27	703.197	712.783	821.551	773.508	898.257	820.349	1008.65	1008.06	914.564	915.136	1011.88	940.951
TMEM19	0.000377131	3.41398e-07	24	6	46.4656	0.0123443	0.00191087	24	9	26.3582	N	N		355.749	403.731	460.153	396.185	433.782	427.571	435.827	419.34	383.127	410.057	394.07	389.634	365.313	380	346.809	380.21	314.866	347.689	311.838	326.965	326.436	308.838	327.325	351.489	296.14	302.91	335.444	330.273	331.557	323.992	356.555	328.352	289.29	337.251	358.233	332.04
KIAA1161	0.000519343	5.22373e-07	24	16.5	31.9366	0.588623	0.349965	24	21.5	11.0143	N	N		169.056	168.887	152.812	166.815	141.965	161.347	176.467	177.787	183.883	189.833	202.783	177.339	188.836	193.276	231.772	210.944	217.029	234.284	228.273	224.023	223.328	221.802	212.696	209.419	238.224	243.434	243.718	210.13	237.325	227.209	217.977	206.119	199.658	199.161	231.248	244.177
SCD	0.000785103	1.18453e-06	24	15	178.672	1	0.825244	24	1	0	N	N		1309.86	1102.76	1252.11	1232.15	1248.46	1281.29	1339.95	1413	1409.17	1409.72	1547.77	1576.01	1657.5	1592.07	1753.99	1570.18	1588.73	1704.6	1665.68	1532.3	1581.28	1437.97	1545.97	1579.49	2081.18	1999.57	1775.15	1749.49	1680.47	1822.28	1708.52	1703.59	1597.27	1691.73	1801.86	1857.89
TEF	0.000785103	1.18453e-06	24	7	122.528	0.110718	0.0410599	24	12	16.0444	N	N	CAY	169.916	159.394	364.431	295.243	550.694	405.742	581.102	462.836	482.071	451.671	439.593	378.976	337.631	362.217	270.4	321.52	179.285	272.086	151.843	232.461	187.35	239.115	314.685	295.448	293.409	275.247	293.791	280.014	293.166	296.8	311.343	314.451	274.799	350.468	306.102	325.91
KIF3C	0.000785103	1.18453e-06	24	19	45.9221	1	1	24	12.5	7.92653	N	N		514.05	478.681	491.058	503.288	482.959	465.535	456.764	463.681	416.56	477.387	465.803	453.152	474.561	520.394	531.462	526.936	539.841	535.82	525.844	573.348	558.978	568.074	499.05	568.774	523.983	548.188	552.132	531.308	558.411	608.809	517.556	524.404	473.92	527.753	528.439	542.503
CRY2	0.00109174	1.75697e-06	24	9	41.2815	1	1	24	7.5	0.730687	N	N	CAY	112.704	121.419	178.567	163.971	217.587	174.16	271.751	204.391	250.297	243.135	236.35	244.693	209.598	223.226	173.192	196.059	150.977	173.185	156.938	159.052	127.679	165.181	146.01	173.041	438.2	420.016	424.512	369.044	417.063	438.748	401.4	409.84	456.209	432.958	432.197	416.838
CALM2	0.00142575	2.58131e-06	24	5	1030.51	0.00409101	0.000323018	24	9	575.209	Y	N		12978.2	12504.2	13294.6	12518.2	12913.2	13077.7	11915.2	12590.7	12115.5	12332.6	11680.5	12597.4	11524.4	12176.8	10901.3	11251.5	10838.5	11036.8	11060.6	11043	11438	11100.8	11357.9	11060.9	8112.72	8162.43	8684.33	9200.24	8673.26	8808.61	8825.66	9059.63	9239.03	9033.78	8971.43	8568.17
THNSL1	0.00142575	2.58131e-06	24	10	8.7549	1	1	24	8.5	4.86106	N	Y	CA	115.285	114.923	116.326	121.794	126.191	116.265	120.493	121.199	135.54	125.776	149.903	139.398	143.357	135.246	126.923	138.645	107.273	123.515	117.194	109.691	107.935	106.221	99.3742	114.541	107.091	110.191	104.134	80.8928	88.9968	100.009	115.053	92.993	104.66	110.746	105.153	90.4171
PPP2CA	0.00186799	3.75778e-06	24	3	50.9737	0.236964	0.110879	24	5.5	24.153	N	N		1456.98	1442.04	1423.38	1388.54	1369.08	1382.84	1351.92	1335.72	1313.84	1312.93	1259.46	1301.05	1210.63	1291.16	1206.4	1202.72	1254	1241.75	1243.27	1253.01	1264.94	1256.41	1236.08	1254.06	1184.56	1196.42	1197.32	1292.37	1231.99	1197.34	1200.53	1235.75	1396	1219.57	1134.85	1118.72
TM4SF1	0.00207341	5.42231e-06	24	5.5	44.2161	0.0844948	0.0286919	24	0	27.1471	N	N		276.168	287.308	284.591	313.726	299.24	274.765	276.878	275.337	267.466	251.552	246.007	245.972	229.371	226.034	204.604	244.542	206.103	212.306	193.115	203.773	212.798	215.718	214.875	210.402	343.676	375.756	340.319	324.05	321.086	294.496	308.402	320.203	642.449	289.854	270.457	280.957
UTP11L	0.00207341	5.42231e-06	24	4	31.9648	0.800656	0.513638	24	1.5	22.9905	N	Y		729.994	708.528	655.46	644.512	659.255	698.54	641.349	641.467	656.466	651.323	639.617	673.972	618.907	620.074	598.107	582.224	590.498	591.204	598.199	603.302	619.527	617.675	621.96	605.152	691.176	713.705	692.602	711.283	632.575	635.079	653.562	684.026	810.441	643.968	603.294	630.877
MECOM	0.00207341	5.42231e-06	24	4	19.8103	0.302769	0.150471	24	4	14.7966	N	Y		287.782	281.312	302.619	299.982	292.745	278.087	264.487	288.85	255.267	266.046	251.984	277.944	261.503	256.921	238.988	242.416	227.458	241.756	234.897	244.274	253.164	238.179	249.743	252.187	362.799	374.833	328.354	357.077	318.905	341.505	364.642	336.021	317.199	347.734	317.242	338.681
FOPNL	0.00295804	1.10086e-05	24	5	54.8372	0.0123443	0.00191087	24	11	21.449	Y	N		600.084	627.082	627.559	621.29	668.07	652.034	641.776	637.244	610.382	619.528	561.907	592.55	547.228	635.049	534.858	585.626	546.297	546.809	558.454	550.144	524.316	533.447	550.481	541.244	496.117	537.584	493.639	562.421	542.27	540.14	555.05	578.57	556.038	556.465	580.57	570.598
TBC1D9	0.00295804	1.10086e-05	24	18	46.8578	0.110718	0.0410599	24	0	18.6493	N	Y		392.743	389.74	388.468	389.077	380.429	359.235	386.689	389.779	413.397	383.874	429.477	384.944	422.162	421.65	474.58	424.015	490.178	451.864	494.253	453.11	466.839	434.244	485.539	472.421	432.19	447.679	432.488	426.482	417.063	416.627	402.503	446.271	373.554	411.082	415.711	432.674
GALNT16	0.00295804	1.10086e-05	24	15.5	25.7179	0.427453	0.232515	24	13.5	4.50204	N	Y		153.14	129.414	129.203	127.481	143.821	133.824	155.53	147.381	179.365	144.011	167.376	154.319	167.579	186.256	186.351	192.232	190.707	195.163	168.657	181.834	193.054	175.944	169.982	178.448	79.2258	70.5406	84.1934	76.5849	91.1781	67.7479	78.2951	85.3235	70.8465	79.7554	77.9737	95.5254
FUCA1	0.00295804	1.10086e-05	24	18	24.3428	0.0964854	0.0343842	24	16.5	22.9282	N	N		136.363	145.903	134.783	167.763	161.914	162.297	144.421	151.182	161.745	172.065	167.836	175.634	189.33	181.108	187.625	189.255	196.17	199.119	203.306	215.586	212.798	198.405	206.158	192.213	132.225	125.406	122.302	128.758	123.897	136.418	129.389	142.366	175.506	162.701	186.691	166.531
NREP	0.00375811	1.54982e-05	24	16.5	71.0186	1	1	24	12.5	0	N	Y		480.497	511.159	430.964	505.657	469.041	480.721	476.418	511.822	525.896	529.755	577.541	522.211	569.473	601.822	599.38	659.201	631.718	663.291	607.88	607.521	609.435	589.599	611.5	692.655	421.809	393.737	487.879	548.061	441.494	469.166	469.403	441.477	341.352	490.382	415.266	394.873
PER1	0.00375811	1.54982e-05	24	7	24.6521	0.652985	0.398806	24	19.5	4.31549	N	N	CA	266.704	257.828	307.77	276.761	308.055	284.256	354.643	319.678	304.965	317.946	301.186	274.108	236.786	263.473	262.335	274.313	222.492	292.745	225.216	241.321	252.286	259.236	239.283	253.662	268.821	246.662	273.85	264.218	287.058	276.061	239.296	244.466	261.381	237.899	240.159	263.589
MAPK8IP3	0.00375811	1.54982e-05	24	17	15.0156	0.184819	0.0806795	24	17.5	13.6465	N	Y		174.648	166.389	159.68	164.919	155.419	159.449	173.049	163.006	174.395	194.976	177.952	182.881	171.534	185.788	191.87	191.381	200.144	194.284	197.192	207.148	184.278	225.545	189.595	202.537	167.194	115.723	128.063	123.015	139.167	123.513	140.049	125.589	152.427	126.241	150.155	127.197
SLC45A3	0.00458015	2.16523e-05	24	5	21.0503	1	1	24	6.5	2.86582	N	N		199.168	172.385	211.619	184.349	213.875	185.075	196.549	201.435	178.913	178.144	149.443	180.323	155.715	185.32	149.845	150.553	145.514	154.284	138.595	154.412	149.178	160.97	156.471	156.327	190.688	177.043	178.579	170.88	183.665	189.878	164.309	171.606	194.291	157.232	166.195	172.15
PLCE1	0.00574093	3.0027e-05	24	19	167.486	0.724874	0.45321	24	13.5	37.1072	N	N		1300.83	1467.02	1268.85	1483.8	1202.06	1303.12	1222.02	1405.82	1250.13	1378.39	1327.98	1330.89	1307.02	1385.22	1433.08	1539.98	1528.64	1755.59	1616.77	1639.89	1670.79	1615.31	1552.5	1602.1	650.744	635.327	687.284	694.53	746.002	686.696	764.204	730.523	574.286	660.375	756.122	688.09
DPYSL2	0.00574093	3.0027e-05	24	16.5	120.058	1	1	24	11.5	15.5302	N	N		1025.09	1021.32	1012.16	1069.13	1081.44	980.423	1070.77	1125	1150.28	1169.86	1225.89	1109.65	1184.92	1147.02	1258.61	1229.09	1349.85	1336.69	1258.56	1298.15	1257.48	1294.78	1207.74	1364.66	757.289	725.692	807.371	779.252	806.642	830.027	748.398	828.788	653.184	815.784	807.808	823.971
ABHD10	0.00574093	3.0027e-05	24	4	56.0473	0.0305087	0.00727581	24	8	27.7472	Y	N		511.469	459.194	510.374	482.436	492.702	490.686	475.137	487.752	455.867	491.414	414.303	457.841	400.411	441.773	371.853	392.544	415.683	375.381	428.013	394.045	402.341	395.874	423.648	384.918	430.551	480.875	500.286	497.802	503.443	498.201	524.173	505.71	576.433	495.395	515.963	483.246
DDOST	0.00662966	4.13437e-05	24	18.5	198.002	1	1	24	16.5	37.9676	N	N		4085.3	4271.15	4095.01	4264.68	4211.16	4139.99	4037.81	4239.43	4140.75	4129.1	4295.69	4188.77	4416.88	4435.05	4417.67	4454.93	4524.34	4478.2	4611.33	4635.72	4397.24	4690.12	4472.27	4751.74	4155.8	4186.79	4337.73	4489.31	4310.24	4273.65	4236.76	4269.53	4480.51	4527.37	4388.36	4340.53
PCDHB5	0.00662966	4.13437e-05	24	17	37.0777	0.143413	0.0579452	24	16	31.1926	N	N		212.073	213.857	240.378	229.844	236.144	227.31	249.532	251.266	274.243	256.227	273.596	260.466	291.163	293.891	280.588	278.991	311.39	321.316	316.424	321.48	295.723	293.396	292.892	315.111	197.791	177.504	201.621	220.66	211.585	210.157	218.712	231.524	193.218	251.116	235.703	270.741
PPAP2B	0.00662966	4.13437e-05	24	17.5	29.8998	0.0738391	0.0238555	24	0	9.42457	N	N		78.7207	90.9394	67.821	100.942	64.0234	82.572	87.5926	80.2362	100.3	89.3055	97.483	86.5379	105.293	98.2758	130.319	127.162	142.037	128.351	125.856	159.474	112.322	133.83	125.961	153.869	117.473	108.808	97.4871	108.176	90.7418	97.2436	89.6902	81.0094	105.733	103.454	91.7862	96.0363
MAGI1	0.00662966	4.13437e-05	24	15	25.6489	0.143413	0.0579452	24	21	16.8024	N	N		357.899	362.258	370.011	361.116	381.821	353.066	368.316	377.11	379.061	372.652	413.383	401.996	417.218	400.591	419.396	431.245	405.75	422.414	411.198	390.67	407.606	412.251	418.853	389.834	433.283	399.73	411.218	457.116	409.647	418.931	403.238	429.014	286.606	406.069	393.433	438.804
TFEB	0.00662966	4.13437e-05	24	15	22.2712	0.588623	0.349965	24	17	9.07345	N	N		50.7598	60.9594	54.5143	61.6077	56.1364	60.7426	70.0741	70.5234	92.6191	91.1758	101.621	85.6853	82.5539	102.02	109.518	116.105	81.9446	111.647	97.3219	107.582	89.9455	100.138	83.6835	100.777	77.0402	74.6901	79.7622	81.8501	71.5464	88.4871	77.1924	74.7779	83.7277	84.3128	89.5584	85.8196
RMDN2	0.00662966	4.13437e-05	24	17	11.5582	1	1	24	16.5	1.4015	N	N		47.7486	49.9667	40.7784	53.0774	42.2183	49.3534	54.2647	39.6958	54.6678	54.2379	52.4201	57.1235	56.3541	57.0936	67.0695	62.9431	75.4884	79.1202	77.4499	82.6904	60.1099	66.9148	79.7608	85.5373	36.0614	29.9682	36.7792	39.7284	42.3171	39.6348	34.9204	36.4303	30.0561	39.6498	45.8931	43.9315
CDC42EP3	0.00739527	5.65319e-05	24	17	255.064	1	1	24	16.5	8.64886	N	N		544.162	611.093	486.337	594.752	595.232	591.291	632.376	680.741	679.508	743.434	852.516	734.506	777.588	863.891	877.421	1083.22	966.946	1101.09	993.091	1126.87	960.003	1133.34	907.879	1236.85	510.87	539.428	585.809	496.845	550.995	568.253	588.5	542.14	442.254	557.376	568.094	549.144
CKS2	0.00739527	5.65319e-05	24	4	152.954	3.56114e-06	3.82394e-10	24	10	151.638	Y	Y		1403.21	1190.21	1520.82	1268.17	1559.29	1406.57	1418.57	1386.82	1338.23	1449.93	1184.97	1277.61	1161.19	1230.79	1094.76	1143.18	1140.27	1123.07	1270.79	1143.74	1308.38	1161.88	1253.07	1101.17	994.42	940.08	1085.21	1085.59	1195.35	1135.12	1216.7	1270.27	1311.73	1267.88	1230.65	1228.55
PER3	0.00739527	5.65319e-05	24	11	106.076	1	1	24	8.5	5.26591	N	N	A	179.38	235.343	228.359	297.613	356.768	324.593	553.329	423.985	618.967	500.298	566.045	498.339	551.677	500.271	500.899	415.51	344.167	368.788	284.832	301.229	289.142	306.498	315.992	367.22	274.831	213.005	218.46	205.343	222.928	221.218	210.257	213.309	209.319	184.121	184.464	189.518
AGO1	0.00739527	5.65319e-05	24	9	48.0282	0.0738391	0.0238555	24	11.5	68.6868	N	N		951.1	916.889	952.499	927.907	977.052	944.832	1009.24	1002.95	1043.66	943.553	1049.78	989.004	996.084	967.315	968.262	960.733	905.86	974.937	856.535	895.672	873.568	931.66	897.854	918.788	1331.54	1289.1	1149.91	1134.41	1166.56	1216.24	1131.79	1150.91	1092.22	1129.34	1071.14	1146.82
PDHX	0.00739527	5.65319e-05	24	4.5	35.7941	0.302769	0.150471	24	5	7.5631	N	N		632.776	587.109	637.861	610.864	623.532	588.918	602.039	599.66	602.702	587.733	548.572	568.251	561.564	549.409	556.507	533.741	512.526	536.699	532.468	564.488	559.856	544.209	538.277	552.551	593.92	605.819	594.672	589.225	571.499	622.635	594.749	638.968	614.54	547.806	560.965	589.499
UTP6	0.00739527	5.65319e-05	24	4	27.6876	0.110718	0.0410599	24	1	27.6778	N	Y		692.14	717.522	696.238	710.385	648.121	721.793	678.522	686.653	669.568	658.804	642.376	689.745	643.624	641.601	600.229	629.856	629.235	608.786	627.752	648.023	640.587	591.471	638.087	651.853	746.361	759.349	742.675	739.045	737.277	696.836	673.779	708.952	801.317	705.038	703.1	673.786
KIAA1211	0.00739527	5.65319e-05	24	17	19.767	1	1	24	7.5	6.62135	N	N		108.832	114.424	107.312	122.268	105.314	100.13	117.075	107.685	129.215	129.984	123.233	121.494	136.436	134.31	129.47	165.013	131.608	139.339	154.39	161.584	156.637	145.06	139.908	148.461	157.905	203.323	212.699	169.923	187.155	187.113	180.116	207.077	127.738	167.258	182.236	193.605
CPM	0.00739527	5.65319e-05	24	15.5	9.28557	0.302769	0.150471	24	17.5	9.53652	N	N		95.9274	86.942	96.1513	109.946	104.386	98.2322	100.411	109.797	112.498	117.36	108.059	118.936	122.101	123.547	116.735	132.266	127.138	124.834	122.799	132.051	104.424	119.324	118.987	115.033	58.4631	70.0796	89.0678	63.6612	81.5804	81.574	85.6468	78.1333	80.5074	72.4635	94.014	72.538
P4HB	0.00867461	7.67819e-05	24	18	189.63	1	1	24	13.5	39.7427	N	Y		5768.12	5751.17	5667.77	5675.97	5742.15	5865.46	5623.02	5827.68	5707.14	5650.09	5748.28	5724.29	5832.65	5970.96	6245.95	6280.28	6084.76	6097.09	5941.73	6137.65	5959.65	6044.33	6004.73	5975.32	6179.61	5965.52	6545.82	6662.89	6358.03	6420.38	6202.59	6139.94	6281.73	6560.45	6106.01	6301.61
PSMD9	0.00867461	7.67819e-05	24	4	38.8609	1	0.825244	24	9	0	N	Y		705.475	694.037	739.163	694.746	713.536	711.353	670.404	720.859	640.201	749.044	648.814	665.446	615.447	640.197	602.776	605.615	571.626	634.28	622.147	627.772	639.71	672.892	616.294	614.983	613.043	631.638	655.823	650.493	617.742	642.453	629.669	652.389	688.607	679.972	672.802	645.691
SATB1	0.00867461	7.67819e-05	24	17	37.6162	1	1	24	15.5	0	N	Y		172.067	148.901	157.104	152.124	154.027	147.111	176.894	157.094	182.076	161.779	174.274	161.992	202.677	185.32	224.131	209.243	224.975	199.998	242.031	216.429	230.348	195.129	221.413	233.015	246.419	258.188	259.227	231.669	249.104	236.887	252.162	254.053	205.026	242.912	266.002	250.307
SERGEF	0.00867461	7.67819e-05	24	17.5	30.1216	1	0.923131	24	15.5	8.94232	N	Y		193.145	187.375	215.053	192.88	214.339	191.244	191.849	214.104	219.123	211.808	219.797	218.263	225.417	221.823	250.025	215.197	263.713	236.482	261.903	253.556	266.326	238.179	249.307	243.339	244.78	226.836	246.377	198.642	246.486	224.444	251.059	239.193	228.641	226.505	283.824	251.84
AVPI1	0.00867461	7.67819e-05	24	5	27.4054	1	1	24	14.5	3.2355	N	N	CA	140.665	191.372	177.279	190.036	192.534	166.568	156.812	188.344	131.474	151.96	133.349	141.104	113.203	127.759	115.886	134.392	115.716	121.318	103.946	109.691	112.761	121.195	93.2722	131.255	112.555	127.711	124.075	125.886	144.402	130.426	123.508	133.737	130.422	122.595	97.5785	119.024
GTF2H4	0.00867461	7.67819e-05	24	4	10.5953	1	1	24	15.5	0.76295	N	N		170.777	147.402	156.246	153.072	158.667	148.535	135.875	152.871	146.835	143.076	128.751	142.809	131.987	136.182	127.347	131.84	142.534	130.548	126.366	118.129	132.505	136.637	135.986	137.646	155.173	155.835	167.501	164.658	164.906	183.426	170.926	152.432	167.455	184.121	151.937	157.847
ZSCAN31	0.00981018	0.000103608	24	12	116.031	0.427453	0.232515	24	13	36.0086	N	Y		592.341	719.021	550.294	701.854	614.717	698.54	758.424	812.919	912.185	879.963	840.101	879.873	884.859	898.054	792.948	881.629	744.951	857.575	693.482	782.183	619.527	750.569	658.136	776.226	581.353	598.443	550.802	687.828	596.366	671.488	669.368	687.382	550.671	794.819	689.288	666.635
DUSP3	0.00981018	0.000103608	24	3	108.997	1	1	24	9.5	20.7616	N	N		1869.08	1895.24	1933.33	1912.68	1866.42	1892.99	1789.45	1811.65	1748.02	1794.53	1673.76	1740.56	1657.5	1734.8	1612.21	1644.6	1661.74	1645.7	1581.1	1719.62	1586.11	1730.43	1598.7	1622.26	2940.64	3058.6	2893.15	3025.58	2826.52	3113.64	2879.64	2914.9	2978.77	3046.66	2863.19	3069.07
SSH1	0.00981018	0.000103608	24	17	98.8843	0.209577	0.0947331	24	20	12.828	N	N		570.402	533.644	531.837	542.622	530.745	514.888	583.239	587.836	628.454	550.328	649.274	582.319	634.726	603.226	711.87	604.339	740.978	703.291	759.213	670.383	761.684	672.424	748.357	690.197	362.253	381.288	357.157	379.095	383.471	388.053	384.492	374.848	318.809	344.999	390.314	374.95
COA4	0.00981018	0.000103608	24	5	77.6513	0.427453	0.232515	24	21	24.1399	N	N		699.883	712.525	750.753	708.015	715.392	725.589	653.313	705.656	671.827	681.247	607.889	660.331	629.288	647.684	600.229	643.04	599.437	575.819	572.212	587.692	558.978	590.067	531.739	590.895	806.464	805.915	798.065	751.49	750.801	742.923	778.173	769.35	858.746	757.904	748.102	763.693
FAM64A	0.00981018	0.000103608	24	6	71.3305	1.37938e-05	4.16227e-09	24	11	90.2669	Y	N		713.648	669.554	937.904	724.602	921.38	776.841	834.48	828.122	718.814	788.32	687.439	783.104	603.088	714.138	609.993	680.891	626.752	657.137	645.076	606.677	651.995	645.284	640.702	608.101	325.645	325.501	419.195	388.19	468.542	451.192	525.643	512.9	487.338	562.389	494.13	486.822
CLSTN1	0.00981018	0.000103608	24	15	45.5046	0.143413	0.0579452	24	15.5	30.4214	N	N		1093.06	1127.25	1033.2	1069.6	1012.31	1110.45	1088.71	1147.8	1163.84	1092.71	1224.98	1143.32	1106.82	1166.21	1204.7	1265.67	1171.06	1174.5	1169.39	1163.15	1121.03	1191.83	1132.78	1125.75	1139.76	1092.23	1085.21	1159.3	1144.74	1107.47	1095.03	1095.78	1101.34	1223.22	1168.71	1199.94
TIMM23	0.00981018	0.000103608	24	5.5	45.2164	0.588623	0.349965	24	2	17.4953	N	Y		669.341	640.073	670.913	648.777	653.224	696.642	619.558	671.45	652.4	651.79	583.519	639.016	614.458	602.758	593.437	582.224	609.37	568.347	581.893	577.989	577.406	591.003	584.041	548.127	607.033	598.443	570.743	622.253	595.057	598.209	589.97	568.983	586.094	562.389	547.598	581.837
ELAVL2	0.00981018	0.000103608	24	17.5	31.6708	1	1	24	5.5	2.42111	N	Y		313.592	311.792	301.761	302.352	338.674	301.34	313.197	294.762	344.724	334.779	354.525	348.283	373.717	343.965	369.307	361.072	369.992	384.173	381.645	370.841	367.241	373.881	374.396	416.871	126.215	146.153	126.29	134.502	124.334	124.896	142.255	136.613	106.807	131.71	117.183	127.197
SOX6	0.00981018	0.000103608	24	18	12.2886	0.126438	0.0488609	24	19.5	2.31258	N	N		40.0056	37.475	33.9105	38.8603	35.7232	35.5914	47.4282	34.206	46.0836	39.2757	40.0048	35.8088	45.9731	49.1379	48.8164	56.989	55.623	64.6148	57.5779	55.2675	60.9874	50.0691	80.1967	53.5837	45.8963	29.9682	31.9049	32.0699	34.9007	29.9566	28.3039	27.802	27.9092	34.6366	35.6451	29.6282
TRANK1	0.00981018	0.000103608	24	17	8.8326	1	0.825244	24	14	11.2695	N	Y		68.8268	67.9547	56.6606	56.8687	62.1676	58.3698	71.7832	70.1011	70.4809	58.446	71.7328	77.5857	78.5992	84.2364	78.1062	73.1501	86.911	81.318	92.7361	81.0028	97.8431	76.7415	89.7854	77.6718	108.731	91.7489	93.9422	94.2952	96.8494	95.4001	103.291	110.249	92.8519	127.609	123.421	144.054
FADS1	0.0101558	0.000138924	24	16	187.291	0.0225248	0.00474194	24	9	89.7372	Y	N		1423.42	1393.57	1497.64	1558.2	1554.19	1524.73	1582.65	1610.64	1616.54	1626.67	1759.29	1621.2	1875.51	1790.02	1903.41	1719.03	1903.1	1864.6	1893.96	1804.42	1878.76	1861.92	1884.62	1872.97	1647.35	1722.02	1671.9	1646.58	1656.04	1760.52	1663.31	1778.85	1537.69	1850.33	1722.1	1797.62
MBTPS1	0.0101558	0.000138924	24	16	186.294	0.0738391	0.0238555	24	18	153.078	N	N		2913.09	2725.18	2797.4	2755.76	2851.36	2798.9	3002.93	2908.35	3166.67	2934.46	3193.95	3061.22	3069.82	3082.58	3181.98	3190.54	3213.72	3288.32	3224.87	3202.14	3236.72	3023.33	3227.04	3156.03	2452.72	2470.3	2577.65	2714.94	2655.51	2759.23	2641.45	2684.34	2501.63	2847.04	2953.2	2991.43
FADS2	0.0101558	0.000138924	24	16.5	155.747	0.0642263	0.0197614	24	15	89.2976	N	N		895.609	931.379	963.23	1019.37	1051.28	1031.67	1015.65	1131.75	1152.99	1184.35	1245.21	1180.41	1262.53	1285.07	1335.87	1362.63	1333.96	1460.65	1282	1452.57	1273.72	1515.64	1268.33	1478.22	811.381	789.778	876.498	869.239	814.495	918.053	852.792	906.922	766.967	931.999	1037.72	1040.05
LGALS3BP	0.0101558	0.000138924	24	17	137.419	0.0553194	0.0163087	24	19	73.5906	N	Y		974.76	852.931	865.791	860.139	870.811	887.411	951.982	918.493	967.305	956.645	1007.94	870.921	956.043	996.33	1072.69	1043.24	1084.65	1095.38	1081.75	1141.21	1086.37	1162.35	1087.45	1052.99	961.637	964.977	1037.35	969.757	970.676	1049.4	1002.4	1022.92	1020.3	1044.57	1035.05	1115.66
PLIN3	0.0101558	0.000138924	24	5	125.629	0.0553194	0.0163087	24	13.5	69.8675	N	N		1674.64	1611.43	1759.91	1665.78	1739.3	1631.51	1639.48	1659.62	1617.45	1621.99	1563.87	1575.59	1485.97	1604.24	1439.02	1517.01	1481.96	1473.83	1406.33	1509.1	1386.04	1467.45	1443.1	1413.33	1462.13	1436.63	1508.84	1490.53	1635.1	1672.5	1605.23	1634.57	1580.09	1673.5	1682	1734.78
SERF2	0.0101558	0.000138924	24	19	118.961	1	1	24	9.5	2.25362	N	N	A	1871.23	1770.32	1785.24	1708.9	1807.04	1737.33	1777.92	1779.98	1881.75	1754.78	1797.92	1742.69	1864.63	1792.36	1890.68	1861.5	1963.19	1885.26	2017.77	1985.41	1983.19	2014.46	2010.58	1963.92	2122.16	2110.22	2256.38	2097.95	2190.89	2252.27	2165.43	2133.09	2321.3	2264.14	2306.68	2191.98
PTPRK	0.0101558	0.000138924	24	18.5	64.385	1	1	24	9.5	14.4976	N	N		825.061	804.963	800.545	844.5	768.281	815.279	774.233	785.892	844.867	805.62	825.387	867.084	856.187	922.857	861.291	902.043	849.741	875.597	938.57	945.455	906.036	944.762	931.851	986.137	1267.61	1204.26	1105.59	1304.82	1129.91	1141.58	1094.66	1179.19	881.288	1142.55	1115.25	1113.1
SERINC1	0.0101558	0.000138924	24	18	55.002	1	1	24	11.5	19.1648	N	N		1235.01	1245.17	1142.23	1242.58	1176.08	1246.17	1219.03	1175.25	1263.23	1207.26	1259	1262.26	1278.35	1256.06	1296.82	1274.17	1343.89	1311.64	1447.09	1369.03	1329	1246.11	1402.57	1426.6	984.585	997.712	909.732	1017.62	914.398	900.079	875.582	935.203	1048.74	1019.5	970.438	1036.48
ELAVL1	0.0101558	0.000138924	24	5	51.5265	0.887308	0.580561	24	7	22.6432	N	Y		1022.51	1067.29	1078.27	1062.5	1087.01	1021.23	1049.83	1075.17	1051.79	1050.16	996.902	1031.21	1013.39	1003.82	1036.18	987.526	975.389	945.487	976.786	977.097	983.696	978.922	965.847	959.591	717.403	716.01	767.047	723.249	731.606	747.531	741.782	757.845	761.064	751.524	694.634	677.873
DAAM2	0.0101558	0.000138924	24	16.5	39.7221	1	1	24	8.5	3.13007	N	N		342.413	330.779	349.836	364.907	329.396	321.746	342.252	364.441	385.386	370.314	406.486	326.116	423.645	411.822	456.327	376.808	445.977	421.974	408.141	407.967	436.126	404.297	419.725	396.224	196.152	187.647	207.382	185.24	208.095	209.696	210.992	199.887	166.919	174.55	168.869	198.203
CCDC147	0.0101558	0.000138924	24	5	34.7602	0.162817	0.0684872	24	15	35.8851	N	N		148.838	142.405	140.364	141.698	133.614	134.298	116.22	120.354	105.721	106.138	94.724	112.116	117.652	95.9359	78.1062	82.9318	68.0389	73.8455	74.3927	66.2367	68.4463	78.6132	71.0438	80.1297	257.347	224.992	275.623	327.401	315.415	319.383	373.832	378.683	402.537	432.502	346.649	436.761
RNF8	0.0101558	0.000138924	24	6	33.6159	1	1	24	7.5	10.7893	N	Y		754.944	742.505	772.644	751.14	798.9	759.282	773.379	768.156	771.675	744.369	757.333	747.721	819.607	712.734	730.972	710.236	720.616	697.137	695.011	699.493	734.481	725.768	709.13	675.941	757.289	759.81	763.058	706.975	721.572	726.331	779.643	756.887	768.041	763.373	721.368	745.303
NCOA2	0.0101558	0.000138924	24	19	32.1722	0.800656	0.513638	24	23	27.2338	N	N		617.721	583.111	572.615	596.173	604.047	568.987	599.903	584.035	597.28	590.071	632.26	601.929	602.1	611.65	635.037	637.512	658.537	637.357	662.91	674.602	694.116	668.212	710.002	726.575	586.817	596.137	569.414	607.414	550.558	550.74	557.623	547.892	428.836	592.013	523.092	583.369
NFIL3	0.0101558	0.000138924	24	16.5	27.6314	1	1	24	7.5	3.93832	N	N		171.637	132.911	146.802	118.95	129.439	124.332	121.775	126.266	142.317	130.919	188.069	141.104	173.511	165.197	197.812	177.346	183.258	162.636	191.587	174.662	182.962	146.932	170.418	158.293	184.132	181.193	185.226	202.471	191.954	206.931	187.835	170.647	194.291	164.524	176.443	185.432
RNF114	0.0101558	0.000138924	24	6	20.4492	0.588623	0.349965	24	16	25.5097	N	N		627.614	644.57	630.564	653.99	668.534	663.423	645.195	685.386	628.003	679.844	641.457	641.574	641.646	623.349	627.821	630.282	578.082	602.632	601.256	632.413	610.313	627.502	613.679	578.114	709.754	723.387	711.656	735.694	701.504	672.409	714.213	711.349	894.706	740.13	738.3	737.64
MARCH8	0.0101558	0.000138924	24	15	20.2424	1	1	24	9.5	2.93868	N	Y		238.313	239.84	255.831	233.635	238	233.005	245.687	260.979	251.653	258.098	282.793	270.697	268.918	284.532	281.862	278.991	276.129	282.195	257.317	277.603	260.622	267.659	264.126	294.956	233.306	221.765	225.107	261.825	242.56	241.035	227.166	240.631	189.998	217.846	209.861	228.342
ZNF259	0.0101558	0.000138924	24	4	18.5577	0.0964854	0.0343842	24	19	30.9306	N	N		615.57	587.109	627.559	618.921	593.376	625.933	589.648	618.663	571.979	591.474	589.956	587.008	576.888	547.537	570.939	559.258	548.781	553.841	543.168	577.989	568.192	575.093	532.611	561.4	691.176	723.387	707.225	655.758	690.597	675.636	689.218	655.265	846.401	674.047	715.13	673.276
IL17RC	0.0101558	0.000138924	24	16	17.1095	0.887308	0.580561	24	14.5	5.29792	N	N		194.436	206.362	213.765	212.784	212.019	198.837	214.922	225.506	230.418	221.16	202.783	226.789	232.337	246.158	245.355	233.91	266.692	241.317	248.655	242.587	231.226	229.289	240.59	252.679	156.266	150.763	185.669	183.325	164.47	191.261	191.511	162.977	158.331	201.439	188.028	180.834
LRRC8E	0.0101558	0.000138924	24	7	15.8933	0.209577	0.0947331	24	7.5	1.36275	N	Y		138.514	128.914	142.081	149.28	157.739	146.636	156.385	160.05	159.034	159.908	140.707	153.466	126.55	149.754	148.147	130.99	118.199	143.295	121.27	136.692	122.414	144.592	122.474	122.407	202.162	193.641	193.645	188.112	178.866	188.496	189.673	188.862	207.709	194.603	192.929	193.605
NEU3	0.0101558	0.000138924	24	5	13.5475	0.340741	0.174483	24	14	10.5721	N	Y		217.235	216.356	227.93	227.475	229.185	227.31	202.531	225.928	217.316	216.017	209.68	202.064	206.138	221.823	193.568	203.715	198.157	182.416	185.982	194.069	197.88	205.892	218.797	184.348	250.244	236.98	237.957	239.328	244.305	255.322	255.102	263.161	297.877	279.372	240.159	248.775
SEMA3C	0.0110882	0.000185139	24	18	219.366	1	1	24	14.5	0	N	N		754.084	665.556	649.021	690.48	690.803	698.065	775.515	622.886	846.674	669.09	753.194	822.323	837.897	918.645	879.544	1000.71	1017.6	974.497	1118.44	1159.35	1037.66	1008.4	1266.15	1195.56	1453.93	1515.47	1347.98	1592.01	1346.29	1361.41	1507.82	1454.81	1475.43	1570.95	1503.33	1528.41
TOMM5	0.0110882	0.000185139	24	5	198.243	0.0738391	0.0238555	24	6.5	124.966	N	N		2105.24	2026.65	2156.97	2048.22	2082.62	2092.77	1930.03	2025.75	1935.06	1978.75	1877.93	1892.75	1897.26	1793.77	1786.68	1745.4	1786.89	1716.91	1738.04	1712.45	1782.24	1764.12	1674.11	1632.09	2408.46	2531.62	2520.49	2455.03	2400.3	2449.99	2433.03	2511.29	2581.6	2448.26	2268.37	2324.28
VMP1	0.0110882	0.000185139	24	18	185.555	1	1	24	16.5	13.0805	N	Y		1230.28	1446.04	1175.28	1462.47	1323.15	1292.68	1400.63	1190.03	1509.92	1396.16	1523.4	1417	1693.59	1451.67	1637.68	1522.54	1824.63	1566.58	1755.36	1725.95	1657.19	1613.91	1776.97	1714.19	1860.44	1692.97	1654.18	1555.15	1651.24	1632.86	1686.1	1727.08	1751.3	1685.8	1813.89	1675.53
PDIA4	0.0110882	0.000185139	24	17.5	73.8847	0.184819	0.0806795	24	13	32.1457	N	N		992.397	1002.83	981.258	1020.32	1010.46	1063	990.438	1040.54	1119.11	1038.47	1086.57	1097.71	1137.46	1109.11	1155.46	1162.75	1128.35	1159.55	1187.23	1197.74	1163.15	1135.68	1112.29	1179.82	890.607	835.422	891.121	909.925	889.095	851.227	924.47	870.492	898.463	955.697	915.634	886.292
SLC44A1	0.0110882	0.000185139	24	18	64.5299	1	1	24	11.5	0	N	N		832.804	903.897	809.989	968.189	798.436	930.121	877.208	886.821	923.48	940.747	910.454	941.259	984.22	916.773	969.111	958.607	1029.03	995.156	1050.67	1018.86	1020.11	989.684	1076.55	1014.65	772.041	790.7	783.885	799.355	788.319	786.705	781.481	813.929	713.296	771.121	863.949	843.893
GOLGB1	0.0110882	0.000185139	24	17.5	64.5279	1	0.923131	24	23	25.328	N	N		795.81	811.959	702.248	769.149	661.111	784.908	725.951	735.639	797.428	711.639	788.141	835.112	838.391	806.33	818.842	871.847	870.103	867.685	974.238	819.732	860.405	804.382	1043.86	969.422	852.36	796.694	730.267	808.45	717.209	701.905	793.243	745.862	641.376	804.39	846.572	839.296
DDX52	0.0110882	0.000185139	24	5	49.4842	0.0844948	0.0286919	24	3.5	37.7175	N	Y		675.793	679.047	661.04	628.399	681.524	628.781	642.631	653.714	648.785	663.012	635.019	649.674	610.503	591.059	576.458	593.281	583.048	574.94	590.046	581.786	600.221	550.76	623.268	584.505	645.28	652.385	602.648	655.28	628.213	569.175	638.859	617.397	697.731	633.486	596.165	603.802
KIAA1432	0.0110882	0.000185139	24	19	40.9499	0.0123443	0.00191087	24	1	21.9803	Y	N		857.754	861.426	841.324	893.786	854.109	824.296	805.425	809.963	794.717	886.042	874.588	853.016	845.312	889.162	914.352	859.088	1012.64	946.366	931.946	1020.55	880.149	1013.08	869.96	1042.67	596.106	622.878	648.289	536.573	639.119	596.366	564.975	596.306	542.083	564.212	559.183	548.633
PSMC6	0.0110882	0.000185139	24	4.5	28.3943	1	0.825244	24	4.5	17.7092	N	N		411.67	418.221	419.803	414.667	410.121	410.012	376.862	380.066	391.259	366.574	373.378	375.14	359.381	378.596	341.715	361.923	330.758	352.524	350.563	350.168	347.497	346.74	347.81	363.779	383.562	393.737	390.835	376.702	343.336	370.079	349.939	418.469	382.679	363.685	362.244	371.374
MED6	0.0110882	0.000185139	24	4	27.7938	1	1	24	5.5	0	N	Y		533.408	568.621	549.865	510.87	538.631	545.26	512.737	533.782	517.763	490.947	499.37	500.044	523.006	486.699	473.731	460.59	501.104	460.216	478.457	466.188	499.307	448.75	510.818	486.678	398.861	446.757	420.967	464.296	397.432	436.444	416.104	423.262	472.31	448.453	410.364	403.046
SLC12A4	0.0110882	0.000185139	24	16.5	27.3006	0.800656	0.513638	24	18	20.3847	N	Y		622.452	672.052	622.837	665.837	602.655	659.152	659.722	668.916	645.171	702.755	649.274	676.53	680.204	672.019	745.829	697.903	766.306	702.851	691.444	724.385	707.717	732.788	659.879	695.605	853.453	831.734	860.102	855.837	839.362	854.453	809.417	833.582	968.773	892.805	864.84	891.911
NET1	0.0110882	0.000185139	24	4.5	25.2327	1	1	24	6.5	0.200058	N	Y		809.145	740.007	757.191	750.666	768.281	758.333	735.351	805.74	740.953	750.447	738.48	726.407	734.581	730.049	677.911	695.777	694.791	676.478	721.507	670.805	766.95	707.519	779.738	707.403	480.272	458.745	471.926	478.656	513.476	454.879	501.75	466.883	622.054	457.568	446.01	442.891
VPS9D1	0.0110882	0.000185139	24	17	12.7859	0.162817	0.0684872	24	14	7.41048	N	N		120.877	93.4377	116.755	91.9377	121.552	103.927	125.621	107.685	120.179	105.67	125.073	115.526	127.538	126.355	135.412	134.817	134.091	156.043	142.671	125.301	137.331	144.124	125.525	130.764	108.184	86.2163	110.338	104.347	118.662	117.522	122.773	112.646	111.637	127.153	114.064	101.145
UBALD1	0.0110882	0.000185139	24	17	3.25778	1	1	24	15.5	1.04664	N	Y		22.3687	22.9847	24.8963	21.7997	19.4854	18.033	22.2186	18.1587	26.2044	24.7811	25.2904	20.8885	22.2451	27.1428	27.5919	28.4945	29.3014	25.9338	34.6486	23.6258	26.3255	28.5441	25.7152	27.0376	20.2162	11.5262	16.3956	19.6249	17.0141	20.7392	19.8495	16.7771	16.1015	17.7741	14.7036	17.3683
HSPA8	0.012253	0.000245257	24	8	988.054	0.00251582	0.000138924	24	16	1316.16	Y	N		17466.1	17607.3	17967	17536.9	17697.4	18828.8	16898.1	18686.6	17632.9	18845.8	17824.7	19022.6	16806.9	17751	15479.9	16907	15986.6	16683.8	15540.4	16731.7	15201.2	16427.4	15340.7	16057.9	18001.2	18308.7	17482.1	17960.6	17462.1	17977.6	18076.2	18274.1	20850.4	19473.1	19535.3	19756.9
FKBP5	0.012253	0.000245257	24	16	123.699	1	1	24	8.5	8.18755	N	Y		1340.4	1169.22	1214.34	1166.28	1183.5	1192.55	1283.55	1269.84	1447.57	1215.21	1476.5	1306.59	1408.36	1347.31	1421.62	1409.84	1411.43	1556.03	1510.27	1460.58	1493.09	1285.89	1456.18	1246.68	668.775	608.586	716.53	662.938	718.518	680.705	710.905	651.431	578.58	524.107	646.959	661.526
BCLAF1	0.012253	0.000245257	24	3.5	96.0801	0.383165	0.201719	24	5	50.3935	N	Y		1970.17	1957.69	1803.27	1828.8	1723.06	1775.3	1654.01	1661.31	1726.33	1672.02	1659.51	1736.3	1645.15	1647.76	1523.07	1568.9	1545.03	1592.07	1599.44	1576.18	1574.7	1532.49	1679.34	1616.36	1357.77	1329.21	1235.43	1302.42	1249.01	1109.31	1342.78	1212.74	1429.28	1170.35	1203.91	1125.36
GAS6	0.012253	0.000245257	24	19	74.3078	1	1	24	9.5	4.66426	N	N		476.195	512.159	491.917	509.449	517.754	501.126	510.601	471.282	525.444	484.868	480.058	467.646	565.519	556.428	598.531	566.063	657.047	573.622	625.204	665.742	625.231	619.547	710.002	628.257	283.027	269.253	338.989	281.45	338.973	285.279	312.078	294.318	343.498	293.956	286.052	288.62
TRAPPC3	0.012253	0.000245257	24	6	53.7158	0.427453	0.232515	24	5	4.87395	N	Y		737.737	750.999	738.734	699.485	758.074	761.181	716.978	737.751	713.393	721.925	687.439	738.769	696.023	701.034	670.27	736.179	621.786	654.06	599.218	639.163	622.598	663.533	610.192	660.702	766.031	776.869	781.67	828.553	778.285	798.227	772.659	802.424	798.097	801.2	757.904	774.931
NT5C	0.012253	0.000245257	24	17	51.6693	0.110718	0.0410599	24	18	25.3525	N	Y		363.492	360.759	365.718	359.22	357.232	355.439	387.971	364.019	394.874	380.133	371.079	386.223	417.218	427.266	407.935	421.038	439.521	417.139	441.261	445.516	465.961	445.475	443.697	422.279	308.707	322.735	344.75	321.178	338.537	338.279	346.998	333.625	331.691	372.799	346.203	322.845
ZNFX1	0.012253	0.000245257	24	6	50.9194	0.126438	0.0488609	24	19	80.7095	N	N		923.14	975.849	945.631	980.985	936.226	971.881	943.437	955.655	893.661	973.477	911.374	953.622	861.131	932.216	877.846	891.411	863.647	893.619	860.101	823.107	853.385	877.848	903.084	916.33	1386.18	1402.97	1299.24	1323.48	1320.56	1288.13	1332.85	1298.07	1640.2	1407.34	1435.16	1464.55
BTG3	0.012253	0.000245257	24	3	48.0899	0.000250565	1.18453e-06	24	7	57.167	Y	N		710.207	657.562	682.502	695.22	688.947	643.966	637.503	635.977	614.9	613.45	587.197	590.845	583.809	569.532	567.968	554.155	589.008	545.05	617.051	545.925	611.629	519.877	585.349	538.295	690.084	716.01	750.651	702.188	743.385	710.201	752.074	781.813	836.741	745.599	714.685	702.904
WDR75	0.012253	0.000245257	24	4	29.5285	0.126438	0.0488609	24	4.5	30.0084	N	N		847.86	806.462	789.385	786.209	826.737	815.279	756.715	769.001	762.639	752.785	791.36	772.02	743.479	727.241	709.748	691.949	720.119	700.214	777.556	745.057	742.379	703.308	752.716	737.882	890.607	947.918	864.091	854.879	885.605	893.166	886.242	925.137	1033.18	896.451	841.67	874.543
MMP15	0.012253	0.000245257	24	17	29.2305	0.529975	0.306247	24	14	8.07228	N	N		96.7877	75.4497	82.4154	70.138	94.1793	63.5899	103.829	69.2565	107.98	86.9677	120.014	82.2749	116.169	97.8078	140.931	107.173	148.99	126.153	152.352	125.723	140.403	123.535	157.342	128.306	46.9891	33.1956	58.9354	46.9083	58.0224	59.9131	50.7264	47.9346	57.9653	46.0303	59.7056	66.4081
GLI2	0.012253	0.000245257	24	17	27.9921	0.0844948	0.0286919	24	19	16.0022	N	Y		203.039	206.362	178.137	192.406	166.554	195.515	209.795	209.881	199.696	223.498	221.636	214.853	192.79	235.394	235.168	250.497	215.539	279.119	255.279	261.993	259.306	267.191	239.283	250.713	146.431	160.445	152.878	147.905	157.053	182.965	146.665	149.076	126.128	151.307	173.324	142.522
FOXO3	0.012253	0.000245257	24	18	23.6295	1	1	24	12.5	1.16406	N	Y		358.33	372.252	318.072	358.747	321.509	341.203	345.243	331.924	356.019	333.844	360.963	355.104	378.66	365.492	390.531	394.245	372.476	393.843	377.568	367.044	402.341	363.586	414.931	390.325	350.779	360.541	320.378	332.666	340.282	336.435	302.888	330.269	304.318	314.92	338.183	338.17
GEMIN7	0.012253	0.000245257	24	3	15.654	1	1	24	8.5	1.88249	N	Y		234.011	202.865	238.661	199.04	223.154	217.819	218.341	207.347	194.726	211.808	192.207	189.275	180.926	183.916	177.437	174.795	183.258	181.537	195.663	190.694	177.697	207.296	175.648	187.789	224.018	236.057	225.55	224.011	230.345	237.348	226.431	216.185	265.675	244.279	229.02	240.091
ZFYVE9	0.012253	0.000245257	24	15	13.7199	0.588623	0.349965	24	2	9.90831	N	Y		332.95	344.77	311.633	332.208	318.261	337.406	357.634	343.326	370.476	342.26	338.891	356.809	362.842	364.556	379.494	375.107	342.181	373.623	365.849	367.044	345.303	345.337	345.63	347.065	427.819	449.985	401.47	406.857	418.808	383.444	435.218	434.766	364.43	373.255	407.246	402.024
CDC20	0.013381	0.000323018	24	7	316.942	0.00158769	5.65319e-05	24	11	251.484	Y	N		3065.37	2617.75	3646.88	2573.31	3674.85	2870.56	3554.55	3152.86	3270.58	3082.21	3063.36	2940.16	2648.64	2957.17	2555.43	2738.45	2491.61	2674.26	2566.04	2346.55	2710.65	2441.22	2690.95	2239.21	1308.59	1286.79	1512.82	1467.56	1763.79	1636.55	1823.21	1750.57	1682.07	1780.6	1677.99	1721.5
HN1L	0.013381	0.000323018	24	4	141.113	1	1	24	8.5	0	N	N		3903.34	3735.51	3832.32	3684.14	3844.19	3762.24	3630.61	3631.74	3683.08	3702.21	3611.93	3557.43	3539.93	3483.64	3442.62	3321.95	3633.37	3282.61	3557.09	3530.79	3478.48	3378.5	3574.85	3298.1	2471.3	2468.46	2458.01	2594.79	2498.02	2621.43	2489.64	2505.54	2744.23	2614.15	2433.67	2416.23
GPX8	0.013381	0.000323018	24	5	93.8804	0.302769	0.150471	24	2.5	33.6497	N	N		1412.24	1373.08	1422.95	1329.31	1341.71	1292.68	1301.07	1258.86	1269.11	1226.43	1258.08	1297.64	1246.22	1248.1	1174.14	1187.41	1104.51	1197.79	1155.63	1153.87	1126.73	1171.24	1151.08	1209.81	611.404	636.71	576.504	701.709	626.904	601.435	566.813	630.339	487.875	678.604	572.55	560.382
COL4A4	0.013381	0.000323018	24	18	77.896	1	1	24	17.5	5.97911	N	N		184.112	202.365	169.552	267.757	208.772	249.614	260.214	246.621	264.755	272.125	274.056	302.243	269.412	334.138	304.784	327.474	370.986	354.722	388.778	415.561	352.323	411.316	431.929	445.384	87.9679	64.0859	88.1816	81.8501	103.83	86.1827	96.6742	107.373	77.8238	94.3392	139.016	81.2222
ZNF281	0.013381	0.000323018	24	17	77.804	1	1	24	12.5	0.64811	N	N		569.542	572.119	593.648	588.591	605.438	593.189	619.985	652.869	670.924	624.671	680.082	668.004	640.658	671.083	685.552	716.191	769.286	717.357	755.136	736.198	778.796	702.84	754.023	730.016	389.026	389.126	404.129	414.995	410.083	363.166	394.049	367.658	425.079	385.105	391.651	394.362
RABAC1	0.013381	0.000323018	24	18	74.7111	0.887308	0.580561	24	18	55.6363	N	Y		455.978	443.704	521.106	497.127	504.3	487.839	482.828	506.755	508.275	562.485	481.437	530.737	509.659	575.615	574.335	592.856	648.604	669.445	602.784	683.461	622.598	687.866	578.811	647.429	691.723	699.874	781.227	738.087	761.271	792.697	771.189	754.49	760.527	848.597	886.227	829.079
LOC151760	0.013381	0.000323018	24	19	63.5542	0.110718	0.0410599	24	19	123.17	N	N		999.279	1166.22	999.716	1162.02	946.896	1177.84	911.818	1116.13	961.431	1118.42	967.933	1148.01	1118.68	1173.23	1220.83	1126.6	1288.27	1132.74	1282	1247.11	1198.25	1201.66	1276.61	1248.65	1922.18	1955.31	1750.34	2139.11	1797.82	1919.06	1822.84	1928.89	1674.02	2126.51	2031.33	2121.48
CALB2	0.013381	0.000323018	24	5	62.9448	1	1	24	11.5	13.6846	N	N		1066.39	909.893	1007.87	916.533	966.846	902.597	929.337	914.27	876.493	888.847	898.039	856.427	827.516	883.546	872.327	867.169	801.567	807.026	717.94	810.028	730.094	872.232	680.364	815.554	1493.27	1496.57	1574.86	1534.57	1495.49	1563.27	1408.58	1462.48	1400.83	1468.87	1437.84	1448.21
AIMP2	0.013381	0.000323018	24	7	56.2678	1	0.923131	24	14	7.48696	N	N	A	1086.6	1054.8	1142.23	1028.38	1133.4	1089.57	1085.72	1108.1	1043.66	1125.9	1031.39	1057.64	995.095	1052.96	961.47	1030.06	1012.64	1025.49	924.813	988.909	913.056	992.96	881.292	943.86	876.947	886.599	957.59	866.367	929.667	912.062	943.952	928.492	1072.9	962.989	952.17	938.397
H2AFY2	0.013381	0.000323018	24	18	52.6365	0.209577	0.0947331	24	13	19.3657	N	N		323.916	330.28	307.341	334.577	356.768	324.593	355.498	326.435	368.217	339.922	371.079	322.279	388.547	355.665	409.209	383.613	411.213	397.359	434.637	423.577	422.963	395.406	434.108	386.884	307.068	297.377	329.684	304.904	334.174	331.826	343.322	336.501	294.657	359.583	386.75	357.071
DNAJA2	0.013381	0.000323018	24	10	52.4037	0.529975	0.306247	24	19	40.2246	N	Y		1001.43	1067.29	983.404	1044.96	1059.17	1086.72	1052.82	1079.39	1068.06	1092.24	1058.98	1142.04	1114.72	1093.67	1066.74	1078.54	984.825	1015.38	991.053	1024.77	1006.95	993.896	982.409	989.086	1243.02	1300.16	1225.68	1304.34	1233.74	1245.27	1192.44	1283.21	1397.61	1292.49	1259.16	1294.96
UBQLN1	0.013381	0.000323018	24	5	51.3006	1	1	24	5.5	6.47234	N	Y		1515.91	1543.97	1591.65	1504.65	1547.7	1568.87	1532.23	1488.59	1552.84	1524.27	1480.18	1511.64	1477.57	1458.23	1416.52	1414.52	1496.85	1423.72	1465.94	1451.72	1470.28	1345.32	1465.33	1443.32	1397.65	1519.16	1418.88	1539.36	1458.41	1403.81	1460.41	1496.04	1573.65	1468.41	1459.67	1447.7
PRPF4	0.013381	0.000323018	24	6	49.8105	0.209577	0.0947331	24	6	32.9349	N	N		615.14	621.086	639.578	592.382	624.924	606.002	606.312	636.4	598.184	607.371	606.05	585.729	575.405	560.64	561.176	532.465	551.76	529.226	544.697	521.456	530.459	519.409	507.767	488.152	592.827	605.358	557.006	581.088	600.728	553.044	573.429	573.777	685.387	556.921	523.092	532.286
FAM210B	0.013381	0.000323018	24	17	47.6644	0.977574	0.654469	24	14.5	54.0041	N	N		274.017	282.811	290.6	340.264	333.571	317.475	336.698	323.901	353.308	342.26	344.409	334.215	367.785	357.537	384.588	362.348	414.689	397.359	406.612	406.28	431.738	424.418	411.008	391.308	638.177	688.808	702.351	664.853	663.113	762.74	725.976	797.631	672.505	824.899	867.513	928.18
RELL1	0.013381	0.000323018	24	7	44.2537	0.110718	0.0410599	24	5.5	70.8773	N	Y	C	951.531	1014.32	946.06	998.045	982.62	960.967	1013.08	1016.89	985.377	978.62	955.058	868.789	971.367	936.428	969.96	920.33	931.685	916.036	906.469	861.499	880.588	875.508	852.526	883.394	1064.9	1042.43	1076.35	1119.58	1031.75	1059.08	1032.91	1051.2	1019.76	1035	948.606	939.419
LAMP2	0.013381	0.000323018	24	18	38.8102	0.236964	0.110879	24	17	19.1274	N	N		784.626	760.993	731.866	821.278	752.043	792.026	754.151	786.315	820.018	807.023	840.101	857.705	847.289	825.985	853.225	868.02	843.285	864.169	869.783	902	866.986	868.489	909.186	919.771	712.485	732.147	720.962	714.633	702.813	698.679	724.873	755.928	773.408	716.887	730.279	743.259
SCD5	0.013381	0.000323018	24	17.5	37.0758	1	1	24	11.5	4.16533	N	N		247.777	263.824	242.954	278.656	270.94	250.089	271.751	241.131	288.249	256.227	269.918	233.183	270.401	271.896	301.813	305.784	320.329	314.283	313.366	315.573	318.539	285.441	301.173	301.838	392.304	375.756	415.207	417.388	445.856	431.835	403.606	446.75	296.804	434.325	429.524	459.748
ZNF623	0.013381	0.000323018	24	17	31.1645	1	1	24	9.5	3.38426	N	Y		393.603	390.24	384.176	408.981	396.667	431.842	379.426	434.542	406.169	413.33	425.798	426.721	445.89	430.542	442.743	446.556	458.89	464.611	472.852	449.313	457.625	435.18	471.156	452.758	473.169	498.856	465.723	498.281	501.261	472.853	512.41	507.627	501.293	478.988	458.04	446.466
LTBP4	0.013381	0.000323018	24	17	27.5827	0.162817	0.0684872	24	15.5	10.7921	N	N		197.017	150.4	188.869	153.072	190.214	147.111	215.777	180.32	203.762	194.041	223.475	174.781	199.711	204.507	238.564	207.117	245.337	228.569	246.617	221.07	244.827	242.391	226.207	202.537	208.719	183.498	207.825	178.539	208.532	221.679	217.977	211.871	208.783	184.577	188.474	239.069
REV1	0.013381	0.000323018	24	13	26.8754	1	1	24	6.5	1.86	N	Y		505.017	553.631	506.082	557.787	535.384	558.073	562.302	554.052	589.599	582.122	602.371	602.355	613.964	584.975	578.156	554.58	599.437	592.522	599.218	577.989	585.742	556.376	544.814	574.181	497.21	476.725	451.543	481.049	465.488	478.383	480.063	480.784	507.734	450.732	481.209	481.714
ATG12	0.013381	0.000323018	24	3.5	22.7118	0.0738391	0.0238555	24	3	15.024	N	N		532.117	530.147	507.37	485.279	495.949	487.839	476.418	485.218	472.583	486.739	468.102	467.219	456.765	452.537	440.196	461.866	458.393	450.106	442.28	453.953	439.197	470.276	475.078	431.128	531.086	549.11	521.113	543.274	516.53	504.192	531.157	534.47	593.071	528.664	490.12	510.831
ATAD2B	0.013381	0.000323018	24	17	18.9501	1	1	24	11.5	1.9061	N	Y		298.536	346.269	312.921	333.156	330.324	331.711	353.362	328.124	344.724	350.676	339.351	356.809	348.012	357.069	352.327	359.796	381.912	366.151	381.645	375.904	374.261	348.144	385.729	359.355	330.563	322.735	308.857	321.178	340.282	289.426	335.603	341.773	316.126	314.008	359.125	337.149
CLDN12	0.013381	0.000323018	24	7	16.3166	0.0305087	0.00727581	24	0	32.0449	Y	N		442.642	446.702	422.808	439.784	449.092	427.096	468.3	436.232	462.192	450.736	435.915	419.901	394.973	418.842	420.245	429.969	393.831	409.667	413.745	409.655	409.361	388.855	426.263	411.464	824.494	858.936	704.123	706.975	702.813	677.94	665.325	692.654	909.197	650.804	676.366	759.095
CAMK2D	0.013381	0.000323018	24	21	15.515	0.0964854	0.0343842	24	1	7.60212	N	Y		292.514	286.809	278.581	293.821	278.363	267.172	252.95	292.229	254.364	268.384	272.217	269.845	263.975	253.177	288.229	288.347	273.645	285.712	288.399	306.714	304.06	288.248	315.121	302.822	345.861	359.619	329.684	313.52	324.576	307.4	305.829	322.6	274.799	313.097	314.568	331.019
SLC22A18	0.013381	0.000323018	24	16	5.70899	1	1	24	17.5	1.27562	N	N		18.067	20.4863	20.6038	20.3779	16.7018	20.4057	31.1915	27.0269	33.885	25.2487	30.8083	23.4462	27.1884	30.8867	37.3551	32.3221	38.7375	36.0437	33.6296	33.3293	35.1007	40.2425	30.0738	33.92	18.5771	21.6693	27.4736	16.2743	23.1217	26.7305	29.4066	23.0086	20.3952	30.5349	26.2883	32.6932
LOXL4	0.0151835	0.000423037	24	17	631.619	0.0642263	0.0197614	24	16	222.832	N	N		921.849	1119.25	978.683	1212.25	1155.2	1210.11	1419.43	1304.05	1612.93	1608.43	1533.98	1520.59	1791.96	1716.55	2040.52	1781.55	2223.93	1848.78	2281.21	2206.9	2236.79	2155.78	2490.89	2105.5	578.075	509.921	682.853	580.131	721.136	655.357	767.88	702.241	699.341	705.038	1055.1	793.832
NEDD9	0.0151835	0.000423037	24	17	164.496	0.0553194	0.0163087	24	18.5	21.6622	N	N		245.626	222.352	260.553	266.335	253.774	232.53	335.843	239.864	382.223	271.19	399.588	287.323	468.135	354.729	513.209	383.187	599.934	406.15	562.531	485.173	582.232	460.449	627.626	498.967	196.152	163.673	193.645	172.316	153.127	180.2	191.511	165.374	212.54	153.586	226.347	170.107
PTTG1	0.0151835	0.000423037	24	7	159.46	0.000309198	2.58131e-06	24	12	210.225	Y	N		2228.7	2121.59	2387.9	1970.5	2509.9	2016.37	2422.68	2048.98	2477.67	2114.34	2355.23	2104.62	2267.51	2040.39	2044.77	1905.73	1963.19	1883.94	1880.2	1796.41	2014.34	1865.66	1953.92	1800.22	1215.16	1191.81	1386.98	1201.9	1497.24	1383.99	1580.24	1547.33	1681	1569.13	1639.23	1564.17
TSC22D1	0.0151835	0.000423037	24	18	77.2592	0.476387	0.267231	24	15	25.8989	N	N		415.972	381.246	415.511	417.985	451.411	394.352	445.654	410.894	431.018	408.187	460.745	451.873	479.999	510.098	481.372	556.706	512.526	530.985	540.111	537.487	512.908	540.466	567.915	534.854	433.283	454.134	468.825	411.165	431.024	487.14	467.565	484.618	506.123	500.864	496.804	524.624
POLR2C	0.0151835	0.000423037	24	5	57.3967	1	1	24	12.5	4.74235	N	N		1009.17	965.356	1029.76	911.32	973.805	951.001	908.4	956.5	922.576	910.355	912.754	889.251	866.568	891.034	853.225	857.813	816.466	858.015	838.701	845.889	841.1	864.278	828.554	806.213	893.885	893.976	915.936	919.498	950.608	926.349	909.767	890.624	1061.09	837.66	891.574	884.76
C12orf23	0.0151835	0.000423037	24	19	54.6246	0.529975	0.306247	24	17	40.6159	N	Y		788.927	869.92	762.342	809.905	800.292	760.706	764.406	780.403	800.138	764.007	852.976	801.435	855.199	767.955	862.14	814.008	840.801	844.388	942.137	888.922	897.699	854.451	979.358	898.633	813.02	847.871	788.76	897.48	790.501	790.853	861.246	842.69	864.65	864.093	937.467	972.623
PNPT1	0.0151835	0.000423037	24	3.5	53.5561	0.724874	0.45321	24	3	22.9242	N	N		836.676	783.977	786.809	730.289	733.949	768.773	722.532	762.666	718.363	720.523	680.542	786.941	669.329	679.507	590.89	643.466	630.229	676.478	696.54	675.867	645.852	644.816	676.877	674.958	790.618	868.618	771.035	763.935	782.212	722.644	759.793	759.763	879.141	755.17	728.497	730.489
PRPF40A	0.0151835	0.000423037	24	3	52.8584	0.0553194	0.0163087	24	1	44.9386	N	Y		1651.84	1628.41	1604.1	1604.64	1602.9	1635.3	1616.4	1531.24	1563.68	1569.16	1592.84	1651.47	1534.91	1519.06	1454.73	1471.93	1477.49	1488.34	1574.98	1532.3	1540.92	1477.27	1603.5	1541.15	1550.09	1610.91	1495.54	1519.73	1406.06	1395.51	1493.86	1422.22	1576.87	1380.45	1477.94	1422.15
DR1	0.0151835	0.000423037	24	4.5	51.8944	0.427453	0.232515	24	16	23.43	N	Y		1173.93	1188.21	1187.3	1222.2	1164.48	1241.43	1162.2	1238.59	1114.14	1175	1138.53	1208.12	1100.88	1177.91	1071.41	1124.04	1099.55	1070.32	1104.68	1085.1	1124.1	1103.39	1172.44	1087.9	1220.08	1224.09	1177.38	1312.47	1233.3	1251.26	1232.14	1296.15	1421.22	1294.77	1270.75	1252.56
IVNS1ABP	0.0151835	0.000423037	24	18	51.0128	0.529975	0.306247	24	2	13.5524	N	Y		702.464	751.999	675.634	764.884	667.142	725.115	668.268	725.082	698.935	779.436	805.154	747.721	759.792	745.492	753.895	762.547	816.466	807.905	795.9	854.749	798.979	790.344	807.197	830.301	632.713	627.95	618.6	619.381	611.635	577.009	606.144	602.537	692.364	592.469	596.165	557.828
UPP1	0.0151835	0.000423037	24	6.5	46.4146	0.383165	0.201719	24	1.5	24.6029	N	N		569.112	454.697	530.978	473.432	492.702	485.466	497.783	499.998	485.685	484.401	512.246	444.199	434.026	453.005	450.809	440.176	426.609	451.864	404.574	415.561	416.82	425.822	359.578	375.086	578.075	519.142	525.101	554.762	549.686	496.357	498.075	485.577	560.332	427.033	473.635	453.107
EXTL3	0.0151835	0.000423037	24	7	41.0349	1	0.923131	24	1	74.8158	N	Y		1323.63	1410.56	1314.35	1360.11	1337.53	1318.3	1328.42	1360.21	1346.37	1347.53	1325.22	1281.02	1271.92	1324.85	1259.04	1257.16	1271.38	1288.78	1213.72	1219.68	1219.75	1283.55	1185.95	1273.72	2680.56	2629.83	2485.04	2533.53	2551.24	2619.59	2399.95	2545.8	2359.4	2472.87	2275.94	2563.35
TRIAP1	0.0151835	0.000423037	24	6	40.8367	0.162817	0.0684872	24	8	38.1658	N	Y		589.33	615.09	586.78	605.177	593.84	615.493	541.365	625.42	579.66	588.201	559.148	546.936	577.383	567.66	566.27	542.246	546.794	520.875	511.067	508.377	479.124	497.416	520.407	523.547	874.215	966.36	925.685	1005.18	951.044	992.714	947.628	1044.01	1029.42	1076.47	920.09	1014.51
TRPS1	0.0151835	0.000423037	24	18	38.5679	0.800656	0.513638	24	11	11.0848	N	Y		252.508	214.857	239.09	228.896	242.175	236.327	261.923	234.374	265.207	250.617	270.377	267.287	290.669	260.197	296.719	277.715	288.544	299.778	314.385	321.902	298.794	281.229	346.502	335.758	240.956	241.59	204.28	214.916	206.787	219.835	204.744	211.391	200.195	203.718	235.703	220.679
PSMD6	0.0151835	0.000423037	24	4	36.1528	0.236964	0.110879	24	2.5	26.9333	N	Y		911.525	925.883	901.848	878.147	896.791	877.446	829.78	865.284	816.403	847.234	820.329	843.211	846.795	780.591	764.507	821.237	755.877	797.356	757.175	796.106	806.877	810.933	773.637	798.839	901.535	913.801	845.923	931.943	871.209	872.888	887.712	966.84	962.869	933.822	861.721	868.413
SNHG3	0.0151835	0.000423037	24	10	33.7515	0.0738391	0.0238555	24	13	69.7686	N	Y		1465.58	1484.01	1543.57	1503.7	1733.27	1519.04	1750.14	1554.47	1762.93	1543.91	1635.14	1592.64	1592.75	1540.12	1527.32	1515.31	1551.48	1534.49	1537.28	1525.13	1535.22	1460.43	1506.74	1452.66	1112.99	1118.97	1090.97	963.056	1107.66	1066.91	1144.28	1201.24	1174.87	1100.17	1187.43	1168.27
RINT1	0.0151835	0.000423037	24	6	22.1978	0.588623	0.349965	24	0	0	N	Y		298.106	324.783	266.133	298.561	267.692	300.391	294.397	277.448	281.923	272.125	274.976	286.044	261.997	262.537	255.119	265.382	241.364	256.262	237.445	246.384	250.531	245.198	255.845	229.574	372.634	373.911	305.755	372.873	306.69	311.087	327.884	324.517	363.357	303.526	278.032	343.279
MRPS18C	0.0151835	0.000423037	24	4.5	20.5846	1	1	24	8.5	3.18344	N	Y		292.944	301.799	303.048	301.878	315.478	306.56	262.351	285.894	269.725	283.346	272.217	283.06	240.741	264.877	259.364	274.738	233.915	258.02	239.483	259.04	254.48	255.025	240.59	250.221	239.863	233.291	246.82	244.593	248.667	240.113	236.356	246.863	290.9	272.08	226.347	215.571
GLI1	0.0151835	0.000423037	24	16.5	20.3696	0.0844948	0.0286919	24	14.5	5.1382	N	N		57.2123	51.4657	66.9625	50.234	69.5906	51.7261	64.0922	70.9457	76.3543	71.0704	76.331	81.4223	82.5539	96.8719	95.9348	96.9664	93.3672	112.087	95.7933	100.832	98.2819	94.991	100.682	106.184	42.0716	41.0334	49.6298	39.7284	50.1697	44.7044	53.2995	46.9759	45.0842	47.8532	57.9233	49.5506
MPG	0.0151835	0.000423037	24	19	17.167	0.652985	0.398806	24	19	11.0781	N	Y		301.978	307.795	315.496	300.456	294.6	307.035	321.315	304.898	293.67	309.53	304.864	310.343	307.97	319.63	338.743	318.543	344.664	338.459	331.2	367.044	358.466	368.266	324.274	352.964	310.893	342.099	389.949	322.135	361.658	371	362.069	333.145	379.995	339.53	373.383	361.158
SLC38A2	0.0170652	0.00055099	24	16.5	376.966	0.209577	0.0947331	24	2	114.513	N	N		3448.22	3417.22	3327.52	3687.46	3399.27	3579.07	3508.83	3537.57	3618.47	3815.36	3849.66	4026.36	3894.86	3940.39	3840.79	4186.99	3849.41	4334.91	4269.93	4653.44	3850.54	4249.79	3775.78	4845.15	3761.31	3863.6	3541.89	3679.43	3620.95	3531.65	3557.47	3710.13	3391.51	3551.62	3644.27	3594.72
LDLRAD4	0.0170652	0.00055099	24	18	256.438	0.383165	0.201719	24	13	35.6678	N	N		463.29	385.743	457.577	395.237	521.93	437.062	598.194	394.424	623.033	468.503	632.26	552.478	726.177	662.192	812.474	697.052	939.632	727.466	1001.24	810.45	986.767	870.361	1178.11	977.288	239.316	214.388	262.329	284.8	287.931	305.096	344.057	300.07	255.477	338.163	400.116	317.226
PPIL1	0.0170652	0.00055099	24	7	80.8034	1	0.825244	24	15	11.105	N	N		1432.89	1358.09	1483.05	1317.93	1487.85	1380	1368.58	1489.01	1415.94	1405.98	1404.77	1358.18	1368.32	1312.22	1282.39	1282.25	1313.6	1247.02	1341.11	1285.5	1291.7	1214.76	1246.97	1269.29	684.073	732.608	705.452	766.328	769.124	710.201	760.161	748.258	788.973	773.855	707.11	674.808
ANAPC1	0.0170652	0.00055099	24	6.5	73.9556	1	0.735861	24	5	34.7521	N	Y		932.603	899.4	950.782	892.838	952	891.682	889.599	919.76	878.3	869.209	920.571	925.913	856.187	881.674	813.748	815.709	812.99	829.004	781.632	776.277	780.99	809.529	794.122	813.587	886.782	1002.32	901.313	950.61	913.526	907.453	904.621	933.286	865.187	909.667	802.461	856.664
APRT	0.0170652	0.00055099	24	19	67.5792	1	1	24	17.5	14.1214	N	Y		1062.08	959.86	1115.61	987.619	1064.74	1016.49	1032.74	1046.45	1075.74	1063.72	1075.07	1021.83	1117.2	1088.05	1144.43	1162.32	1140.27	1133.62	1162.77	1200.28	1154.81	1240.97	1179.85	1163.11	1337	1323.21	1526.12	1323.48	1431.8	1538.38	1378.44	1418.38	1504.42	1465.22	1503.78	1502.35
BAG6	0.0170652	0.00055099	24	16	57.6206	0.427453	0.232515	24	19	31.7855	N	Y		803.123	773.484	797.97	711.332	807.715	776.841	822.944	865.706	873.33	838.35	888.843	792.056	833.942	833.473	940.67	913.526	878.546	934.937	904.431	929.001	900.771	942.423	862.986	880.444	911.916	846.487	907.96	872.59	900.002	924.505	798.757	781.333	892.022	838.115	838.106	842.871
CHMP1B	0.0170652	0.00055099	24	17	51.765	1	1	24	9.5	7.15473	N	Y		546.743	526.649	533.554	557.313	584.097	535.769	619.558	599.66	613.997	565.758	604.211	608.749	618.413	591.059	640.131	626.879	674.429	661.093	676.158	657.304	659.454	637.797	627.19	689.706	458.963	513.609	561.88	510.726	541.397	546.131	560.564	563.231	667.138	607.964	560.965	615.552
LPHN1	0.0170652	0.00055099	24	16	44.6246	1	1	24	14.5	2.62298	N	Y		354.028	280.813	362.714	314.199	351.201	339.304	416.599	385.978	384.03	385.744	415.222	341.462	419.196	399.187	460.996	403.601	430.085	445.271	458.075	435.812	440.075	458.577	419.725	390.325	269.368	294.611	319.049	261.346	320.65	332.748	299.212	296.715	290.363	298.969	302.092	307.52
HNMT	0.0170652	0.00055099	24	17	42.5905	0.184819	0.0806795	24	13.5	26.9222	N	N		134.642	108.927	120.618	108.05	137.789	116.74	138.439	124.577	148.191	131.854	163.238	143.235	182.409	168.941	159.608	185.427	201.633	192.086	213.497	198.71	217.185	182.495	238.847	218.268	194.513	186.725	217.574	196.249	196.316	215.226	209.89	203.243	206.099	227.417	280.705	265.121
POLR2K	0.0170652	0.00055099	24	3	41.0085	0.977574	0.654469	24	16.5	8.34059	N	Y		750.642	723.018	719.418	721.758	716.32	692.371	710.141	657.092	672.279	674.701	652.492	650.526	699.978	650.024	617.209	642.615	643.141	600.874	634.376	629.459	667.79	581.644	705.644	588.437	354.604	382.21	362.475	383.403	364.276	348.879	369.788	414.634	467.48	376.901	380.957	365.755
CAPN1	0.0170652	0.00055099	24	15.5	36.2333	1	0.923131	24	18.5	18.3869	N	N		449.095	444.704	459.294	451.158	501.053	482.619	513.165	522.38	545.775	546.587	568.344	506.012	519.546	546.601	582.825	591.155	625.262	573.622	529.411	560.27	564.243	587.259	571.837	553.043	781.33	775.025	788.76	847.221	732.915	835.097	718.624	767.912	788.973	831.735	805.134	896.509
KIAA1737	0.0170652	0.00055099	24	9.5	33.607	0.724874	0.45321	24	16	3.80963	N	N	CA	245.195	309.294	291.459	287.187	326.148	325.542	326.87	359.374	344.272	346.468	342.57	363.63	313.902	330.394	290.351	341.934	284.571	323.074	287.889	305.026	286.509	326.619	268.049	299.38	356.789	370.223	320.378	325.486	356.86	343.809	370.891	359.03	385.899	360.494	348.431	397.427
SMARCA4	0.0170652	0.00055099	24	15	27.5343	0.267118	0.129367	24	19	28.938	N	Y		551.045	538.641	547.29	480.54	528.425	559.022	590.503	566.299	598.635	586.798	594.095	526.474	575.9	571.872	611.266	608.592	601.92	606.149	607.88	588.958	618.649	591.003	582.298	563.858	578.075	603.514	587.582	553.805	582.405	600.514	527.849	567.066	547.987	567.858	504.378	566.512
RELT	0.0170652	0.00055099	24	3	19.6563	0.209577	0.0947331	24	7.5	17.0231	N	N		206.48	206.862	210.76	210.414	199.957	199.312	180.74	196.79	172.136	183.287	153.582	184.586	162.636	179.704	143.053	160.76	161.406	165.273	155.409	169.178	163.218	185.303	150.805	157.802	174.297	198.712	204.28	209.651	181.047	204.165	185.262	202.284	251.72	199.616	184.909	200.757
RPF2	0.0170652	0.00055099	24	6	19.4349	0.0479328	0.0134079	24	16	5.18784	Y	Y		251.218	271.819	274.718	259.226	270.012	266.698	282.433	274.915	267.918	261.371	280.034	293.717	267.435	246.158	230.498	238.588	244.841	234.284	244.069	247.227	247.898	224.141	246.256	240.389	18.5771	24.4356	19.4974	23.4541	22.2492	15.2087	18.7467	20.6119	23.6155	22.3315	31.635	20.9441
TBCEL	0.0170652	0.00055099	24	19	17.0288	0.236964	0.110879	24	18	16.1611	N	Y	CA	174.648	167.888	167.406	172.028	172.585	183.651	161.94	157.094	168.522	179.079	183.011	183.733	209.104	190	205.453	192.232	196.667	195.603	212.987	195.335	210.604	202.616	225.335	221.217	198.338	207.011	207.382	229.276	206.787	205.087	208.419	194.614	217.907	221.948	241.496	196.67
PIGH	0.0170652	0.00055099	24	6	15.3913	1	1	24	12.5	1.62544	N	Y		162.603	125.416	141.651	136.485	135.47	128.603	142.285	145.27	143.221	135.595	128.291	128.741	111.225	119.803	113.339	123.334	115.219	121.318	123.818	111.801	121.536	106.221	108.963	123.882	171.018	179.348	183.896	174.709	174.503	170.522	172.764	166.812	195.365	183.665	184.018	170.618
KIAA0247	0.0170652	0.00055099	24	17	14.8618	1	1	24	13.5	1.46388	N	Y		78.7207	82.9447	67.3917	64.4512	69.1267	72.6064	72.6378	88.6821	74.9989	71.0704	86.4472	84.4064	96.3952	89.8522	107.821	95.2652	88.8975	98.0211	86.6216	98.3003	95.2106	104.818	99.81	98.8103	225.11	198.712	184.782	194.813	197.625	194.948	177.91	191.738	208.783	201.895	184.018	196.67
MVB12B	0.0170652	0.00055099	24	17	7.98987	1	1	24	13.5	0.58963	N	Y		84.743	76.9487	73.8305	93.8333	81.1891	89.2157	90.5836	90.7936	100.751	79.9542	96.5633	97.6215	99.3612	97.8078	104	102.495	100.817	111.647	104.455	98.7222	103.986	90.3116	100.246	102.743	125.668	130.477	125.404	115.835	129.133	141.026	128.286	133.737	100.366	124.418	143.917	129.751
TRAM1L1	0.0170652	0.00055099	24	20	5.30922	1	1	24	8.5	0.649736	N	Y		101.52	116.422	112.892	117.055	105.778	109.621	100.838	110.641	98.9443	105.67	106.68	112.116	112.214	108.571	114.188	108.875	107.77	136.702	118.723	119.817	121.097	128.214	109.399	117.491	120.751	115.723	105.906	112.005	102.521	118.444	122.037	115.043	98.2191	116.671	129.659	127.197
NR1D1	0.0170652	0.00055099	24	1	4.91993	0.209577	0.0947331	24	17.5	0.724758	N	N	CA	14.1955	15.4897	18.8869	10.8998	18.5575	12.8129	21.7913	14.3581	14.9094	9.35136	4.13843	5.54183	4.44901	8.42364	8.9143	5.52879	5.95961	7.03291	8.15262	9.70346	14.479	12.6343	21.3567	14.7478	3.82469	9.221	7.08997	3.35059	3.49007	5.53044	4.77858	6.71084	3.75701	1.82298	4.01008	4.59748
NUAK1	0.0189245	0.00071381	24	17	160.738	1	1	24	16.5	11.5519	N	N		988.525	1086.78	984.263	1093.77	1005.82	1074.86	1045.56	1114.86	1154.8	1124.5	1127.03	1124.14	1246.71	1247.17	1375.77	1265.24	1314.09	1288.78	1342.13	1290.56	1337.34	1349.53	1370.75	1404.97	620.146	610.891	647.846	740.481	657.006	640.149	621.95	640.406	500.219	668.578	669.237	614.019
SREBF2	0.0189245	0.00071381	24	16	129.871	0.143413	0.0579452	24	19.5	27.5835	N	N		618.581	619.087	603.95	693.324	711.68	671.965	718.687	775.335	739.145	865.001	810.672	801.008	839.38	953.743	934.303	929.261	889.472	989.003	896.788	988.066	895.067	1063.62	901.341	1071.18	809.742	859.397	853.899	794.09	871.209	897.775	822.282	794.755	808.295	777.957	878.652	847.469
NUP98	0.0189245	0.00071381	24	6.5	128.232	0.126438	0.0488609	24	9	72.3719	N	Y		2233.86	2044.14	2445.85	2111.72	2403.2	2145.45	2347.91	2239.01	2342.13	2223.75	2197.97	2301.57	2088.56	2224.31	2021	2092.43	2050.6	2041.3	2114.08	1956.3	2072.69	1944.27	2129.57	2007.18	1777.94	1823.91	1707.35	1842.82	1781.24	1791.4	1768.07	1873.76	1867.77	1934.64	1665.96	1837.46
TM7SF3	0.0189245	0.00071381	24	18	97.5283	0.0553194	0.0163087	24	14	175.391	N	N		1051.76	1162.23	1043.07	1180.02	1170.51	1199.67	1145.97	1224.24	1186.43	1340.05	1230.95	1229.01	1272.91	1289.75	1299.36	1297.99	1314.09	1337.57	1396.14	1389.28	1311.89	1362.16	1334.58	1441.35	1954.96	1912.43	2060.08	2152.04	2120.65	2201.58	2173.52	2306.61	2157.06	2458.74	2450.16	2461.18
WDR3	0.0189245	0.00071381	24	6	96.2103	0.302769	0.150471	24	19	73.7694	N	N		1219.52	1346.1	1175.71	1243.05	1132.94	1278.92	1131.44	1250	1183.27	1238.59	1118.3	1322.37	1156.25	1183.05	1078.21	1099.38	990.785	1067.68	1046.08	1060.63	1046.88	1073.44	1078.73	1028.91	1610.74	1739.54	1496.87	1605.41	1461.03	1437.91	1512.97	1518.09	2005.17	1582.8	1591.11	1602.48
AMD1	0.0189245	0.00071381	24	5	90.672	1	1	24	8.5	1.6252	N	N		1352.88	1441.04	1355.13	1448.26	1300.42	1490.57	1185.71	1348.39	1326.94	1418.13	1165.66	1302.76	1231.39	1135.32	1185.6	1177.21	1164.11	1126.14	1164.81	1165.68	1182.45	1134.28	1209.92	1133.12	1082.93	1155.39	1107.81	1120.53	1164.81	1131.9	1143.55	1166.73	1358.43	1091.05	1153.57	1134.05
NCF2	0.0189245	0.00071381	24	5	90.5766	1	1	24	16.5	9.1001	N	N		552.335	571.119	522.393	557.313	544.199	554.751	487.528	505.91	449.993	446.06	452.008	471.909	467.641	435.221	435.951	381.912	420.152	370.986	349.034	331.183	399.27	386.047	363.5	329.368	753.464	710.017	713.872	845.785	698.45	757.67	717.889	753.052	763.21	864.093	797.114	811.2
CTDSP1	0.0189245	0.00071381	24	18	85.8854	0.340741	0.174483	24	18.5	20.2034	N	Y		600.084	481.179	587.21	533.144	603.583	546.209	564.438	622.886	571.076	569.031	687.899	566.546	638.68	603.226	688.099	688.121	706.214	710.324	708.768	680.93	715.176	726.704	679.493	701.996	551.302	507.155	576.947	538.966	578.479	629.549	570.488	521.528	549.061	544.615	555.618	537.394
CCAR1	0.0189245	0.00071381	24	6	73.859	1	0.923131	24	4	19.1574	N	N		972.609	945.37	999.716	894.26	1004.89	927.274	989.156	926.939	946.522	888.847	972.991	963.853	838.391	897.118	795.495	881.629	810.01	893.179	875.897	781.762	859.089	790.344	884.779	861.272	829.958	850.176	744.447	874.026	855.94	828.644	824.488	829.268	834.057	839.938	796.668	786.169
FBLN1	0.0189245	0.00071381	24	17	49.6543	0.0964854	0.0343842	24	14.5	12.4119	N	Y		357.899	331.279	371.728	326.995	365.583	324.593	426.854	389.357	432.373	394.628	449.709	390.912	450.339	410.887	462.27	418.487	464.849	453.183	533.487	459.438	530.02	464.192	478.565	461.606	243.688	252.655	266.317	244.114	280.951	258.548	281.936	249.26	279.092	278.46	275.359	286.065
CYHR1	0.0189245	0.00071381	24	17	47.082	0.0553194	0.0163087	24	14.5	15.4199	N	N		267.134	240.34	297.897	267.283	308.982	249.614	300.806	295.185	304.965	318.882	321.418	318.869	308.465	334.138	362.09	352.141	376.449	354.283	352.601	367.888	370.312	382.772	356.527	373.119	273.739	260.032	264.102	246.508	248.667	276.061	267.6	265.557	264.064	292.588	289.171	261.546
KIAA1324L	0.0189245	0.00071381	24	17	42.4526	1	1	24	9.5	4.1786	N	Y		273.587	238.341	265.704	285.291	276.507	248.665	293.542	267.736	302.254	278.671	303.945	296.701	345.54	297.167	339.168	309.612	353.107	333.624	387.249	309.667	378.21	305.562	390.087	356.897	258.44	243.895	271.192	260.389	266.118	279.287	278.26	290.004	227.031	283.473	292.736	276.871
PPP2CB	0.0189245	0.00071381	24	5	41.1979	1	1	24	9.5	8.28758	N	Y		640.089	655.563	676.064	642.616	657.399	602.206	641.349	598.815	589.148	574.174	606.05	561.43	598.639	574.212	581.976	555.43	547.787	519.996	575.269	525.253	544.938	529.703	558.762	528.463	590.642	586.455	568.084	589.225	559.284	566.409	563.872	590.554	691.827	546.438	550.272	553.741
FAM101B	0.0189245	0.00071381	24	5	35.5025	0.800656	0.513638	24	19.5	14.4439	N	Y		714.938	729.514	705.682	780.523	752.043	744.571	686.641	736.062	741.856	734.55	654.791	690.598	733.592	686.527	744.131	664.73	674.429	643.511	650.171	658.992	654.627	686.462	694.747	694.13	923.936	954.834	1009.44	944.867	1001.65	1024.51	965.272	946.707	989.168	942.481	1003.41	970.579
OSGIN1	0.0189245	0.00071381	24	5.5	33.9886	0.529975	0.306247	24	1	6.5163	N	N		115.715	206.862	140.364	178.189	134.542	186.973	127.757	173.986	112.046	136.062	98.4027	126.61	110.731	128.227	76.4082	119.507	78.4682	93.186	50.9539	85.6436	51.7735	92.6513	57.9683	87.9952	278.656	237.902	217.574	267.569	215.512	217.992	221.285	204.201	301.635	214.2	193.375	214.549
FAM210A	0.0189245	0.00071381	24	4.5	32.2174	1	1	24	8.5	3.32541	N	Y	A	614.279	654.564	668.767	627.925	649.513	679.558	619.558	642.312	602.25	640.101	606.97	613.438	612.481	590.123	609.993	579.247	620.296	569.666	590.555	580.098	565.121	579.773	632.856	589.912	605.394	594.754	541.94	586.353	554.921	562.261	613.863	567.545	686.46	548.717	596.165	555.274
AGPAT5	0.0189245	0.00071381	24	5	31.5911	0.0738391	0.0238555	24	7	37.7569	N	Y		666.76	687.042	668.767	688.585	688.019	697.116	655.877	695.521	674.99	689.663	642.376	681.646	651.039	643.473	635.886	631.558	634.698	622.852	662.91	661.101	623.914	646.219	628.498	675.941	878.04	896.281	796.293	777.816	871.209	804.679	896.534	843.169	992.388	837.66	813.154	828.568
GALNS	0.0189245	0.00071381	24	15	29.2536	0.126438	0.0488609	24	19	13.9754	N	Y	CA	312.302	288.308	316.355	306.143	312.23	318.424	331.143	331.08	342.013	362.365	374.298	321.853	350.483	372.044	379.919	359.371	357.576	379.777	353.11	390.67	397.076	362.65	365.679	342.149	436.561	410.795	420.967	414.516	429.715	431.835	425.293	407.444	407.368	423.843	411.701	466.389
SENP5	0.0189245	0.00071381	24	2	28.8849	1	1	24	16.5	4.94141	N	Y		1044.45	1105.76	1022.9	1071.5	995.61	1034.05	1008.81	1009.29	959.172	993.583	973.451	991.988	999.544	966.847	964.866	930.112	974.893	928.344	995.639	977.097	996.859	954.589	1036.45	964.998	1047.42	1012	964.236	1068.36	1012.12	988.105	1029.97	1027.24	1120.13	1025.88	986.479	1036.48
NOP14	0.0189245	0.00071381	24	6	27.8016	0.887308	0.580561	24	0	12.7576	N	Y		280.469	308.794	298.756	276.287	282.538	295.646	290.124	307.854	281.02	295.503	264.4	278.797	250.628	282.66	273.372	294.302	231.928	254.503	218.592	243.852	254.919	255.961	226.207	247.272	309.254	312.592	293.791	340.803	294.911	303.253	279.363	285.211	344.572	283.473	269.566	280.446
FBXO21	0.0189245	0.00071381	24	19	27.165	0.00477936	0.000423037	24	7	15.9547	Y	Y		688.698	650.067	670.484	695.22	648.585	674.338	682.795	668.072	700.291	648.517	670.426	679.088	694.54	714.606	703.805	684.719	740.978	687.906	719.469	742.948	721.757	722.493	718.719	739.357	678.063	704.023	668.23	677.298	685.362	670.105	703.553	681.629	692.364	680.427	677.257	716.185
RUNX2	0.0189245	0.00071381	24	15.5	24.9707	0.383165	0.201719	24	17.5	8.87252	N	N		92.9162	76.449	85.4201	89.0943	86.2924	88.2666	110.239	95.8611	126.504	96.3191	117.255	100.606	131.987	117.463	161.731	120.357	161.903	121.757	170.186	108.426	134.26	97.7986	149.061	122.898	68.8445	61.3196	65.5823	53.1308	65.0025	62.2175	65.7973	62.3149	59.5755	57.4239	75.7459	59.2564
DCHS1	0.0189245	0.00071381	24	16	21.1773	0.0964854	0.0343842	24	15	15.7474	N	N		131.201	163.391	142.081	157.811	156.811	166.093	184.585	160.472	193.371	171.13	166.917	164.976	185.375	180.172	212.67	194.358	220.505	196.042	203.816	181.413	204.023	181.559	199.184	154.852	208.719	177.965	173.704	136.417	172.322	188.957	180.483	186.945	159.941	191.413	196.939	209.441
CTBS	0.0189245	0.00071381	24	17	15.8982	1	1	24	13.5	1.96438	N	Y		129.911	139.907	110.316	119.424	123.871	124.807	141.003	127.533	136.444	127.179	142.086	139.398	153.738	136.65	164.278	145.875	145.514	149.449	154.9	144.708	161.463	141.317	174.341	152.394	138.235	140.62	138.698	156.52	138.73	141.487	156.59	153.87	135.252	159.967	164.413	156.314
NRBP2	0.0189245	0.00071381	24	16.5	15.8168	0.529975	0.306247	24	19	9.90658	N	N		68.3966	59.4604	63.5285	52.1296	74.6939	66.4372	84.1744	75.5909	84.4867	74.8109	96.1035	77.5857	86.0142	74.8768	102.727	94.84	106.28	98.0211	106.494	100.832	105.741	95.4589	129.012	89.47	61.1951	70.0796	63.8098	75.149	72.4189	74.661	66.1649	59.9182	77.8238	56.5124	94.9051	81.733
CCDC53	0.0189245	0.00071381	24	16.5	14.9689	0.476387	0.267231	24	18	8.12107	N	Y		154.43	148.401	145.515	157.337	152.172	159.924	152.967	151.182	172.588	160.376	163.698	162.418	182.409	170.345	189.323	159.484	192.197	168.79	184.453	180.147	188.227	167.053	183.494	167.142	171.018	172.894	178.136	177.581	169.705	163.609	162.104	164.895	177.116	190.501	206.742	189.008
DROSHA	0.0189245	0.00071381	24	4	14.5066	1	1	24	7.5	13.6304	N	N		423.285	395.736	406.926	399.502	389.244	412.86	385.408	398.647	388.548	382.471	379.816	397.307	374.211	369.704	372.702	366.601	355.093	367.909	383.173	318.949	372.067	341.593	365.244	356.897	446.396	456.9	413.434	404.464	393.505	375.609	401.033	403.13	367.114	388.295	363.135	333.062
DGAT2	0.0189245	0.00071381	24	6	10.2227	0.0844948	0.0286919	24	6.5	14.0667	N	N	A	134.642	118.421	157.534	128.428	168.873	140.467	148.694	129.223	145.48	140.27	149.903	122.347	133.965	124.951	120.98	122.059	120.185	114.724	104.965	122.348	101.353	126.811	100.682	127.323	189.595	161.367	167.501	155.563	153.999	163.609	149.974	151.953	184.094	159.967	163.522	180.323
SULT1A1	0.0189245	0.00071381	24	16.5	9.55355	1	0.923131	24	4.5	3.93323	N	Y		55.9218	62.958	60.0946	57.3426	66.807	59.3189	72.6378	62.0775	66.4147	68.265	77.2507	63.9442	71.1842	69.2611	79.3797	75.7018	82.9379	83.9553	87.6407	73.4088	77.2215	81.8888	80.1967	80.1297	46.4427	34.5787	39.8811	42.6004	47.1159	46.087	42.272	31.6368	33.2764	51.0435	40.9919	47.5073
PPOX	0.0189245	0.00071381	24	18	8.59905	0.267118	0.129367	24	11	6.01119	N	N		64.9553	59.4604	60.953	59.7121	74.6939	54.0989	71.356	53.6316	64.1557	56.5758	75.8712	71.1913	77.1162	67.3891	75.1348	74.426	70.0254	77.8015	80.5071	78.8934	75.9052	81.8888	73.2231	69.8063	60.6487	53.0207	62.4804	57.4387	76.7815	52.0783	84.9116	70.4638	67.6262	75.6537	77.9737	71.0055
MAGEE1	0.0189245	0.00071381	24	16.5	7.32204	1	1	24	9.5	0.170772	N	Y		37.4246	31.9787	47.6464	31.2778	36.6511	32.7441	38.8826	37.5843	40.2102	43.0163	44.1432	36.2351	43.0071	43.5221	49.6654	49.7591	50.16	43.0766	56.0493	49.3611	50.4572	45.8577	43.1493	41.2939	48.6282	37.345	40.7674	40.2071	48.4247	41.0174	48.8885	46.0172	46.1576	47.3975	43.6653	43.9315
ASRGL1	0.0189245	0.00071381	24	2	6.71991	0.0225248	0.00474194	24	10	6.45258	Y	Y		169.916	166.889	175.562	185.771	179.544	159.449	166.64	162.162	157.227	166.922	178.872	155.171	163.625	148.818	151.543	152.254	160.413	153.405	161.524	155.255	170.677	165.649	166.059	166.159	95.0709	94.9763	106.35	99.5604	109.937	98.1653	95.5715	118.398	103.586	106.189	114.064	99.6121
FZD5	0.0189245	0.00071381	24	7	5.72636	1	1	24	7.5	2.96192	N	N		112.274	122.918	115.467	120.372	119.232	120.536	123.057	131.334	133.733	142.141	117.255	115.952	112.708	118.399	115.886	106.323	95.8504	110.329	119.742	105.894	114.077	114.644	99.81	106.184	124.576	124.022	128.506	110.569	118.226	117.522	119.464	113.605	125.055	107.1	108.272	110.85
CBLB	0.0189245	0.00071381	24	17	4.82284	1	1	24	17.5	1.18286	N	N		31.8324	28.481	24.4671	20.3779	24.1248	24.2021	26.9187	28.2938	24.3972	21.5081	32.1878	31.1195	34.6034	26.6749	34.8082	31.4716	39.7307	32.5272	44.3299	32.0636	38.172	25.2685	34.8681	32.9368	39.3397	39.6503	38.1086	32.0699	31.4106	39.6348	38.9638	34.9922	33.2764	30.9907	43.2197	35.2474
TUBA1A	0.0206455	0.000919932	24	18	363.313	0.143413	0.0579452	24	15	170.733	N	N		766.128	686.542	812.135	773.888	903.75	749.791	966.51	848.814	1053.6	977.685	1079.21	900.335	1189.86	1095.54	1314.22	1110.86	1363.26	1273.84	1505.18	1396.03	1501.87	1402.87	1488.87	1438.89	1545.18	1595.69	1735.71	1604.93	1681.34	1747.16	1705.22	1676.27	1611.22	1800.19	1946.67	1965.68
ITM2B	0.0206455	0.000919932	24	18.5	148.27	0.0844948	0.0286919	24	14	56.8559	N	N		974.76	1096.77	864.074	1128.37	998.394	1204.89	1001.97	1142.31	1058.57	1185.75	1098.98	1219.2	1156.74	1253.25	1259.04	1316.7	1257.97	1323.94	1338.56	1393.5	1301.8	1383.22	1335.01	1433.49	867.659	860.78	883.145	888.385	874.699	896.853	924.103	920.823	945.694	930.176	1052.87	1001.23
STIP1	0.0206455	0.000919932	24	7	130.916	0.0738391	0.0238555	24	7	79.0709	N	N		3032.25	2787.64	3122.34	2699.84	2942.76	2857.75	2850.82	2972.54	2960.65	2901.73	2856.44	2808.01	2740.1	2755	2650.09	2702.73	2745.89	2774.04	2564.51	2681.95	2521.98	2612.02	2497.43	2468.78	2498.62	2620.15	2610.44	2565.12	2676.45	2534.32	2625.28	2631.61	2813.47	2622.36	2493.38	2548.54
PRRC2B	0.0206455	0.000919932	24	16	113.109	0.267118	0.129367	24	15	45.3436	N	N		971.748	815.456	959.367	880.517	938.082	872.226	1111.36	986.483	1084.32	1052.5	1178.53	1001.79	1055.4	1004.29	1242.48	1089.6	1189.44	1109.44	1198.94	1065.27	1187.72	1146.44	1176.36	1029.4	1032.67	891.67	892.45	845.785	917.452	954.001	951.304	894.459	949.988	932.454	981.578	998.164
SPCS3	0.0206455	0.000919932	24	5	101.564	0.340741	0.174483	24	1	59.671	N	Y		1777.88	1892.24	1683.08	1761.51	1597.8	1753.47	1553.17	1616.13	1517.6	1511.65	1475.12	1592.64	1524.53	1450.27	1458.55	1483.84	1416.4	1424.6	1458.3	1427.25	1393.94	1411.76	1432.21	1447.25	1329.35	1327.36	1281.96	1495.8	1230.69	1272.46	1228.46	1275.54	1377.75	1302.98	1184.75	1231.1
HTR2A	0.0206455	0.000919932	24	18	99.7208	0.977574	0.654469	24	21	3.25522	N	N		169.486	125.416	158.392	153.072	177.224	159.924	195.267	149.07	226.352	193.573	196.345	220.395	259.526	274.704	303.086	244.117	308.41	280.877	333.238	332.449	308.886	337.382	423.212	375.086	53.5457	44.7218	60.7079	38.2925	62.8213	44.7044	66.9001	49.8519	32.7397	33.2694	60.5967	35.7582
ATP13A2	0.0206455	0.000919932	24	18	76.7926	1	0.825244	24	11.5	31.8493	N	Y		516.201	462.692	501.36	438.837	497.805	522.007	541.365	497.042	549.389	517.13	531.558	514.112	516.58	576.083	621.029	616.672	626.255	606.588	681.253	642.116	669.984	700.032	700.849	605.643	937.05	947.457	1002.35	953.482	933.594	992.714	902.416	821.598	975.75	890.526	803.352	935.843
LIMD1	0.0206455	0.000919932	24	6	68.728	0.383165	0.201719	24	0	10.2824	N	Y		726.123	780.979	694.951	696.641	685.236	686.201	659.722	697.21	614.449	632.152	623.983	628.785	612.975	600.886	611.266	618.799	565.169	611.863	562.021	525.253	573.457	570.882	533.918	559.433	506.498	491.479	424.512	504.982	500.389	489.444	473.447	480.304	452.452	486.736	432.197	464.346
COL11A1	0.0206455	0.000919932	24	18	59.9698	0.0642263	0.0197614	24	18	27.1514	N	N		147.547	142.905	147.232	160.654	148.924	152.331	192.277	144.425	216.864	168.792	182.091	184.586	207.126	215.271	217.339	231.358	211.566	225.932	297.571	269.166	253.602	271.403	291.585	246.288	313.625	296.455	305.755	248.901	308.435	265	300.315	258.847	300.561	267.067	354.223	329.486
PPAT	0.0206455	0.000919932	24	8	55.0483	0.162817	0.0684872	24	1.5	19.1635	N	Y	A	914.966	972.851	908.286	951.129	933.442	911.139	951.982	881.754	914.444	933.266	945.861	929.749	912.542	872.783	879.968	835.697	830.869	833.4	798.447	855.592	786.255	815.144	815.914	789.499	607.033	632.56	542.383	566.728	579.352	555.348	575.635	545.975	678.946	531.855	528.439	506.745
TRO	0.0206455	0.000919932	24	17	49.2574	0.184819	0.0806795	24	17	37.8211	N	Y		378.978	363.258	389.327	392.394	426.823	375.37	429.845	391.89	434.632	420.344	425.798	402.422	447.867	461.896	411.331	444.004	484.715	489.227	481.514	490.236	456.747	472.147	487.718	446.859	360.614	350.859	372.224	382.925	346.826	380.679	382.654	382.518	392.34	432.502	435.762	459.748
RDH11	0.0206455	0.000919932	24	4.5	42.7137	0.184819	0.0806795	24	3	32.4232	N	N		1282.33	1163.72	1324.66	1169.6	1224.8	1234.78	1209.21	1209.88	1148.93	1171.26	1129.79	1232.42	1173.06	1192.88	1065.05	1103.21	1062.3	1131.86	1125.06	1144.59	1124.98	1152.53	1110.11	1151.31	813.567	875.072	809.586	847.221	782.212	759.514	761.999	807.218	816.882	831.735	764.142	808.135
IMPA2	0.0206455	0.000919932	24	17	40.1594	0.143413	0.0579452	24	8.5	8.28253	N	N		138.514	134.41	155.817	189.088	182.327	166.093	209.795	190.033	217.768	237.525	206.921	187.57	202.183	219.483	246.204	238.163	246.827	267.25	245.088	299.12	236.491	274.678	244.077	267.427	94.5245	76.9953	107.679	83.2861	113.427	95.4001	115.789	94.9104	98.2191	82.9456	106.935	100.123
PSG4	0.0206455	0.000919932	24	6	38.9833	1	0.825244	24	20.5	11.2698	N	N		268.425	206.362	227.93	214.205	197.637	202.159	165.358	216.215	160.389	176.273	145.765	177.339	165.602	175.961	165.127	148.852	135.084	138.9	126.366	129.942	136.454	147.4	112.014	142.071	444.757	421.861	420.967	421.696	409.647	428.609	411.693	464.007	346.719	461.214	396.106	461.791
PLRG1	0.0206455	0.000919932	24	3.5	32.6679	0.0844948	0.0286919	24	5	27.1164	N	N		794.95	748.501	761.484	749.719	720.495	748.368	676.386	695.943	693.965	747.642	690.658	727.259	683.665	684.187	621.878	675.788	631.718	640.874	649.152	690.212	632.689	674.296	643.317	670.042	692.816	690.653	693.488	713.676	706.739	664.575	668.633	713.746	814.198	699.113	647.85	685.025
QTRTD1	0.0206455	0.000919932	24	4	32.2161	1	1	24	12.5	7.59856	N	Y		400.056	432.712	375.591	437.415	349.809	393.403	360.198	385.556	358.729	376.392	351.766	395.175	350.483	368.3	321.339	330.026	309.403	323.514	328.653	340.465	324.242	342.529	314.249	352.473	350.779	361.924	325.253	354.684	351.188	315.235	317.224	321.162	424.006	348.189	332.836	331.529
RTCA	0.0206455	0.000919932	24	5	31.7988	1	1	24	5.5	1.57223	N	N		402.207	424.717	391.902	388.603	392.491	396.25	391.817	365.708	385.386	388.082	368.32	398.586	375.2	359.409	356.572	370.429	301.457	361.316	340.881	333.293	336.528	323.344	344.323	359.846	520.158	534.357	473.699	536.573	505.188	507.879	512.043	498.999	490.559	531.399	493.239	539.949
PDXDC1	0.0206455	0.000919932	24	18	30.2597	1	1	24	15.5	7.14764	N	Y		769.14	796.469	787.668	784.314	747.403	766.875	789.188	751.686	834.927	788.788	784.922	754.116	804.777	799.778	828.18	802.525	851.231	810.543	864.178	845.467	848.997	783.793	843.373	838.659	804.824	810.064	755.968	805.578	790.501	785.323	790.67	783.251	714.906	859.08	848.354	858.707
GMCL1	0.0206455	0.000919932	24	18	30.0298	0.302769	0.150471	24	2	11.8009	N	N		397.045	381.746	398.341	368.699	347.953	334.084	380.28	365.286	410.235	344.13	409.245	376.845	435.014	396.847	407.086	406.153	435.051	407.909	458.585	420.202	468.594	421.142	480.308	393.766	237.131	269.253	261	259.431	261.319	255.322	255.47	235.838	230.251	227.873	258.873	231.917
SPRTN	0.0206455	0.000919932	24	4.5	27.6455	0.267118	0.129367	24	6	8.61259	N	N		307.57	268.821	304.336	284.817	283.93	317	276.878	287.583	260.237	265.111	229.453	286.47	237.775	273.768	250.449	258.577	241.861	244.833	242.031	242.165	225.961	251.749	275.458	262.019	245.327	248.967	241.945	255.602	230.345	230.435	243.34	266.516	275.872	270.713	218.326	240.601
EIF4E	0.0206455	0.000919932	24	4	27.4568	1	1	24	11.5	4.97304	N	Y		462.43	440.207	433.969	468.219	451.875	482.144	435.399	455.235	416.108	436.241	392.231	460.399	408.32	435.689	373.551	412.533	358.073	387.249	404.574	416.405	435.687	394.938	401.419	444.401	345.315	384.054	366.906	357.077	355.115	365.931	388.535	395.939	454.599	386.472	385.858	382.613
MEIS1	0.0206455	0.000919932	24	18	24.1533	1	1	24	16.5	1.47128	N	N		149.268	160.893	146.373	173.449	160.986	196.939	155.103	155.405	180.268	182.352	180.252	184.159	187.847	204.975	199.51	202.013	203.62	219.339	200.249	233.305	211.043	223.673	207.901	236.456	131.132	166.439	147.56	151.734	149.2	154.852	159.531	171.126	114.321	152.675	155.502	157.336
IKZF2	0.0206455	0.000919932	24	16	22.6156	0.302769	0.150471	24	1	10.514	N	Y		199.598	195.37	188.439	176.767	203.205	168.466	204.24	193.834	210.991	202.925	228.533	206.753	242.718	228.374	244.506	224.979	234.908	241.756	256.808	206.304	246.582	224.609	259.332	242.356	128.4	131.399	113.44	112.484	121.716	108.765	101.453	105.456	75.677	97.0737	105.599	90.4171
KLHL22	0.0206455	0.000919932	24	19	22.1136	1	1	24	6.5	3.32758	N	N		200.888	178.381	212.477	197.619	218.051	183.651	206.804	179.053	203.31	196.379	210.6	191.833	231.349	206.847	227.951	230.083	239.378	216.262	242.54	229.93	237.807	248.942	237.975	238.914	171.018	171.049	202.951	204.386	192.39	200.478	204.008	188.383	157.258	201.895	209.415	185.432
CEP164	0.0206455	0.000919932	24	5	22.0424	0.110718	0.0410599	24	14	23.487	N	N		415.542	356.262	422.379	356.377	409.193	357.337	369.598	351.772	365.507	350.676	338.891	350.414	346.529	371.576	307.755	350.015	326.289	310.767	312.347	313.464	334.334	336.914	291.149	311.67	365.531	363.307	353.612	383.882	410.956	396.348	364.274	425.18	395.023	417.463	382.294	381.08
AMER1	0.0206455	0.000919932	24	13	21.3882	1	1	24	16.5	1.30267	N	Y		286.492	304.797	285.02	320.36	334.499	323.17	334.988	349.239	363.699	350.676	349.008	367.466	370.257	356.601	368.882	353.417	337.711	333.624	319.99	355.231	339.16	321.004	329.504	375.086	277.017	287.695	259.67	241.721	255.211	293.574	253.264	258.847	267.285	263.876	241.05	265.632
BAG4	0.0206455	0.000919932	24	5	19.4112	0.427453	0.232515	24	1	0	N	N		434.469	454.197	430.535	468.219	444.916	452.722	435.827	443.411	444.12	455.411	423.959	435.673	393.985	411.354	429.16	429.544	418.166	408.788	394.383	418.515	390.056	418.335	397.932	434.569	460.602	472.576	451.1	453.287	444.984	423.54	409.487	422.783	455.672	427.945	417.048	425.012
SPSB3	0.0206455	0.000919932	24	20	17.6271	0.0964854	0.0343842	24	7	11.0457	N	Y		195.726	162.891	193.59	151.65	197.637	177.957	175.185	176.942	167.618	191.703	177.033	152.614	179.443	178.3	187.2	194.358	217.526	185.932	209.93	232.039	215.43	211.507	210.516	230.066	145.338	127.25	149.333	143.118	170.141	174.209	173.131	163.457	152.427	163.612	162.185	150.184
PACRGL	0.0206455	0.000919932	24	5	16.7311	1	0.825244	24	7	9.79628	N	Y		202.609	209.86	211.189	199.988	179.08	207.379	185.867	192.145	182.076	176.741	188.069	195.669	190.319	178.3	175.739	176.496	155.446	167.032	167.129	167.912	168.483	179.219	165.188	182.381	224.018	260.954	247.706	249.38	227.291	242.418	247.751	242.549	244.206	230.607	248.179	245.199
ZNF687	0.0206455	0.000919932	24	14.5	13.564	1	1	24	9.5	3.20318	N	Y		208.201	191.372	205.609	201.884	200.885	205.955	224.75	215.793	215.961	220.225	231.292	202.064	215.53	230.714	224.131	233.485	232.425	233.844	223.178	230.774	209.288	232.096	202.235	215.318	204.348	202.862	214.915	189.548	215.076	231.818	208.052	203.722	215.76	216.023	200.058	209.441
ATG2B	0.0206455	0.000919932	24	18.5	12.8828	1	1	24	11.5	1.81461	N	N		126.039	126.915	126.628	129.85	129.439	119.112	122.63	127.111	114.305	119.697	134.729	134.709	125.067	138.522	130.319	144.174	144.52	156.482	148.785	143.442	144.79	140.849	166.059	168.617	157.905	149.841	143.129	176.145	163.597	131.348	154.752	139.969	171.749	151.763	154.165	150.184
RGMA	0.0206455	0.000919932	24	15.5	11.9331	1	1	24	13.5	2.66595	N	N		44.3073	41.972	41.6369	39.3342	45.0019	46.9806	53.4101	49.4086	59.6376	50.0298	68.9738	43.0558	60.8032	58.9655	68.3429	74.0007	62.0793	78.2411	61.6542	71.2994	65.375	63.6393	70.608	67.8399	105.999	134.165	130.721	129.716	126.515	163.148	127.184	139.01	100.903	134.445	102.48	129.751
DNAJA4	0.0206455	0.000919932	24	8	9.8808	0.977574	0.654469	24	16	2.61828	N	Y		95.4972	82.9447	95.722	94.3072	93.7154	94.9103	106.393	99.2395	119.727	87.4353	103.001	87.8168	102.327	93.596	93.8123	87.1847	80.4547	86.1531	82.0357	80.159	93.8943	70.1904	81.5042	78.655	74.8547	67.3133	61.5941	69.4051	71.1102	60.374	66.5325	62.3149	59.5755	68.8175	68.6169	72.0272
PINX1	0.0206455	0.000919932	24	4.5	6.35065	1	1	24	14.5	0.855091	N	Y	CA	97.648	106.429	101.302	101.89	104.85	113.418	89.3018	109.797	91.7155	88.838	92.4249	95.0638	87.0029	95.9359	93.8123	82.5065	79.4614	83.9553	82.5453	88.1749	89.0679	90.7796	90.6571	75.7054	139.874	126.328	117.428	110.091	109.501	115.678	103.291	123.671	128.275	101.631	106.49	114.426
ZNF808	0.0206455	0.000919932	24	6	6.04543	1	0.825244	24	2	4.87632	N	Y		145.827	142.905	138.217	136.011	144.285	141.891	149.548	140.624	138.251	139.335	137.948	130.446	141.38	130.566	132.865	127.587	132.601	127.032	132.48	130.786	133.821	105.754	129.012	134.697	132.771	128.172	127.62	135.938	130.878	127.2	140.417	113.126	123.981	132.622	126.986	132.816
HAPLN1	0.0231305	0.00117956	24	17.5	388.685	0.184819	0.0806795	24	17	122.874	N	N		1221.25	1045.8	1164.12	1172.92	1261.91	1220.55	1366.87	1189.18	1472.87	1301.24	1630.08	1428.94	1727.7	1473.2	1791.77	1599.1	1949.79	1725.26	2092.17	1811.59	2056.46	1759.91	2131.31	1952.61	564.415	517.759	659.368	500.195	674.02	546.592	692.526	552.685	667.675	573.327	775.727	559.36
AHNAK2	0.0231305	0.00117956	24	16	345.853	0.340741	0.174483	24	18	208.994	N	N		1992.54	1976.68	1957.37	2063.86	2060.81	1994.54	2199.22	2067.56	2313.67	2037.19	2518.92	2300.71	2620.96	2426.01	2712.92	2413.1	2738.44	2557.34	2688.33	2431.35	2723.81	2414.08	2749.35	2656.57	3462.99	3197.38	2973.8	3434.36	2993.17	3177.24	3216.72	3418.69	2804.34	3779.04	3421.49	3671.34
ZNF608	0.0231305	0.00117956	24	17	180.723	0.110718	0.0410599	24	15	53.5536	N	N		560.938	526.149	561.455	553.996	658.791	560.92	750.306	611.062	808.723	670.96	810.212	714.47	834.931	798.842	899.495	833.571	927.216	897.135	971.69	840.404	964.391	850.707	1039.94	947.301	367.17	372.528	436.033	391.062	415.755	391.74	449.186	419.427	367.114	427.033	507.497	426.544
EIF4A2	0.0231305	0.00117956	24	17	134.012	1	1	24	14.5	31.8684	N	Y		1805.41	1892.74	1729.86	1918.84	1871.99	1863.09	1914.22	1876.26	1996.05	2021.3	1933.11	2079.47	2185.45	1930.42	2056.66	1969.52	2103.74	2026.8	2338.78	2235.59	2169.22	2028.5	2211.95	2042.08	1588.89	1570.34	1574.42	1454.16	1556.57	1424.09	1575.83	1645.59	1834.5	1603.31	1881.62	1635.17
FKBP9	0.0231305	0.00117956	24	17	104.897	0.0964854	0.0343842	24	16.6667	57.3813	N	N		1162.74	1350.1	1254.69	1407.5	1261.45	1379.52	1386.1	1376.68	1395.61	1421.88	1457.19	1453.24	1486.96	1536.85	1466.19	1534.88	1477.98	1598.23	1475.62	1469.02	1538.73	1587.24	1499.77	1666.99	536.003	522.369	497.628	543.753	547.941	556.27	544.39	580.487	490.559	611.154	543.588	586.945
FERMT2	0.0231305	0.00117956	24	18.5	94.6865	0.267118	0.129367	24	11.5	36.0043	N	Y		1444.5	1518.99	1430.25	1505.6	1399.24	1473.96	1421.99	1442.14	1551.93	1469.1	1439.25	1510.36	1588.3	1482.09	1594.39	1511.06	1622.01	1488.34	1640.71	1634.4	1679.57	1569.92	1774.79	1685.67	1162.71	1203.8	1137.5	1296.68	1111.59	1084.89	1129.95	1219.46	1178.09	1115.66	1132.18	1034.43
RUSC2	0.0231305	0.00117956	24	17	63.3386	0.0193628	0.00380362	24	11.5	69.3489	Y	Y		830.223	849.434	834.885	943.546	801.22	864.158	855.844	924.828	861.583	1065.12	900.338	901.188	906.115	932.684	968.262	941.17	1021.58	1023.73	978.824	1057.68	947.279	1085.14	921.39	959.099	897.163	946.996	894.223	896.522	886.478	926.81	782.951	820.16	826.543	787.072	762.806	807.113
CHD6	0.0231305	0.00117956	24	17	51.7174	1	1	24	9.5	3.84278	N	Y		584.598	557.628	582.917	558.735	593.84	557.123	630.24	575.167	655.111	593.344	656.171	604.06	624.345	635.517	666.874	640.063	666.979	672.961	676.667	644.647	673.494	627.034	718.283	663.651	412.52	443.991	457.303	453.766	484.683	439.209	457.273	450.105	370.871	442.073	464.278	416.838
CDC25B	0.0231305	0.00117956	24	7	47.9421	0.0193628	0.00380362	24	12	48.3428	Y	N		597.073	565.123	713.408	615.603	735.805	616.917	810.125	682.008	679.508	659.271	721.926	669.283	612.975	648.152	607.87	654.098	606.39	629.006	577.307	544.66	658.137	591.471	621.088	559.433	314.171	298.76	315.504	296.288	369.075	316.157	367.583	354.716	366.577	365.963	345.312	358.604
APTX	0.0231305	0.00117956	24	6	45.169	1	1	24	8.5	2.59179	N	N		699.452	617.089	671.342	669.155	653.688	645.39	604.603	679.052	579.66	597.085	595.474	603.634	603.583	583.571	605.748	565.212	586.028	558.677	537.054	554.363	555.029	564.331	544.814	564.349	672.053	660.223	629.235	738.087	637.374	679.783	629.302	667.728	628.495	722.356	640.721	680.427
HENMT1	0.0231305	0.00117956	24	5	44.1465	0.143413	0.0579452	24	7.5	23.4862	N	N		631.486	660.56	653.314	664.416	651.368	664.372	572.129	608.95	577.401	600.358	586.737	646.263	595.179	612.118	563.299	576.695	552.754	554.721	554.888	527.784	585.304	529.235	556.147	542.719	544.745	538.045	540.167	615.073	573.68	572.862	573.061	543.099	515.784	588.823	526.657	512.875
COPS5	0.0231305	0.00117956	24	4	39.4678	0.887308	0.580561	24	5	5.12846	N	Y		811.726	813.957	844.758	773.888	819.314	805.314	773.379	766.045	796.976	749.512	778.025	794.614	777.588	710.394	741.16	714.489	712.67	727.906	755.646	760.667	734.043	689.737	772.329	751.646	709.754	736.758	729.381	739.045	709.793	743.383	700.98	730.523	757.307	776.59	699.981	720.272
PLEKHB2	0.0231305	0.00117956	24	6	31.9524	0.0738391	0.0238555	24	6	34.5615	N	N		381.128	373.751	360.138	358.747	372.078	336.932	400.79	365.286	345.175	378.73	331.994	340.61	342.08	314.951	331.527	339.808	300.96	304.173	321.519	331.183	312.835	323.812	310.762	301.838	422.902	419.555	428.943	414.037	411.828	391.74	394.049	420.386	443.864	408.803	390.314	410.708
PHYH	0.0231305	0.00117956	24	17	31.4994	0.887308	0.580561	24	20	6.43911	N	N		274.017	243.338	260.124	264.439	253.774	270.969	279.015	271.958	305.417	287.087	290.15	276.665	300.061	302.315	314.972	296.428	322.315	309.008	320.5	324.855	318.1	320.536	331.683	326.91	193.967	202.401	198.076	181.411	181.92	182.965	192.246	186.945	177.116	186.855	197.83	180.834
RBM6	0.0231305	0.00117956	24	5	26.6085	1	0.735861	24	14	14.683	N	Y		691.709	726.516	730.578	696.167	730.238	720.369	699.032	706.079	712.941	713.977	686.979	748.574	686.631	728.645	660.082	691.524	655.06	639.995	687.368	661.523	692.799	675.231	671.647	677.907	540.374	515.454	505.604	516.948	533.108	514.792	566.813	511.941	551.208	533.222	517.3	514.407
MAD2L1BP	0.0231305	0.00117956	24	6	24.7012	0.0305087	0.00727581	24	12	18.8007	Y	Y		423.715	415.223	434.398	399.976	491.31	405.742	420.872	393.157	425.596	436.709	397.749	381.96	392.007	375.32	375.249	391.693	395.817	373.184	392.345	356.919	374.7	379.496	374.832	375.577	351.872	351.32	382.859	379.095	403.103	401.879	409.855	401.692	457.819	411.538	395.215	403.557
CRLF3	0.0231305	0.00117956	24	5	23.2186	1	1	24	7.5	2.18649	N	Y		404.357	408.728	438.261	409.454	462.082	423.3	445.654	419.34	432.825	437.176	404.646	412.654	411.781	378.128	394.776	371.705	385.885	378.019	418.331	393.623	414.627	378.092	414.495	379.51	374.273	419.555	414.763	392.498	440.621	407.87	425.293	392.105	441.717	396.954	423.286	396.405
MRPS9	0.0231305	0.00117956	24	1.5	21.9386	0.0738391	0.0238555	24	4	18.903	N	Y		819.039	786.975	801.833	735.502	776.631	761.655	727.233	766.889	763.543	735.485	750.435	747.721	713.819	748.768	728.001	722.145	722.602	749.444	749.532	750.964	766.511	685.994	779.738	772.785	760.021	821.13	817.12	833.818	795.3	795.001	789.2	823.036	813.662	850.42	785.975	782.083
KLF11	0.0231305	0.00117956	24	5	19.9268	1	1	24	9.5	1.94125	N	Y	A	339.402	378.248	363.572	420.354	360.016	399.572	368.744	390.624	364.151	387.614	331.994	367.466	331.204	339.286	326.433	346.612	296.987	350.327	309.29	340.043	332.14	356.567	346.502	366.237	211.451	195.024	227.322	191.941	202.86	204.626	208.052	202.763	194.291	182.298	204.514	183.899
CACNB3	0.0231305	0.00117956	24	16	19.7382	0.0964854	0.0343842	24	18	18.4821	N	N		214.223	213.358	215.482	234.583	235.68	223.039	246.114	236.486	247.587	250.617	264.4	254.498	256.56	274.704	249.6	259.428	262.223	278.239	245.598	272.541	276.418	296.671	251.486	258.578	189.049	185.803	204.723	176.624	199.37	208.313	186.732	187.424	169.602	172.272	224.119	202.289
C6orf211	0.0231305	0.00117956	24	4	19.3125	0.184819	0.0806795	24	4	15.154	N	Y		514.05	513.158	506.082	513.714	513.579	482.619	493.082	491.552	480.716	491.882	480.058	490.239	485.437	486.699	477.127	447.406	474.782	455.82	463.68	446.781	465.961	461.385	506.895	456.69	378.645	410.795	348.295	398.72	365.149	380.218	392.578	382.038	404.147	347.278	384.522	368.309
GLB1	0.0231305	0.00117956	24	16	19.028	0.0844948	0.0286919	24	22	17.0884	N	N		450.385	436.209	416.799	438.363	421.255	412.385	447.363	448.9	431.469	439.047	488.794	450.167	442.924	474.064	463.119	471.223	479.748	469.447	471.323	468.719	454.554	442.667	465.489	475.863	489.014	507.155	501.173	485.836	475.958	473.774	440.732	471.676	449.768	461.214	469.179	529.732
FOXO1	0.0231305	0.00117956	24	17	18.5313	1	1	24	13.5	0	N	N		86.0335	70.9527	70.8257	73.9293	66.807	62.1662	91.0109	70.5234	100.3	75.2785	87.8267	75.8805	91.9462	67.8571	102.302	97.817	102.307	94.5047	115.665	97.0346	107.496	88.4399	122.038	89.9616	54.0921	53.4818	46.0848	43.079	46.2434	49.774	38.2286	39.7857	35.96	47.8532	50.3487	46.9965
AFP	0.0231305	0.00117956	24	5.5	18.0636	0.143413	0.0579452	24	8	3.67949	N	N		71.838	83.944	69.1087	84.8291	64.0234	78.7755	60.2466	76.0132	70.0291	70.1352	58.3978	67.3546	46.9618	58.0295	39.0531	50.1844	37.2476	49.6699	29.0437	42.189	39.927	46.7936	31.3813	30.9704	75.9475	67.7743	64.696	89.5086	66.3113	72.3566	56.9753	75.2573	59.0388	92.5163	67.7257	81.733
MNAT1	0.0231305	0.00117956	24	2.5	17.9885	0.0738391	0.0238555	24	5	12.9005	N	Y	A	362.201	410.726	403.492	405.663	389.244	401.945	393.526	384.711	362.344	390.419	338.891	372.156	357.898	359.409	342.988	356.394	371.482	370.986	369.925	374.216	383.475	351.888	365.244	375.086	426.18	424.627	423.183	442.278	403.539	437.827	424.558	432.849	370.871	434.325	415.266	421.947
PTGIS	0.0231305	0.00117956	24	16.5	17.732	0.0844948	0.0286919	24	15	5.97494	N	N		40.0056	37.9747	41.2077	47.3906	52.8889	37.9641	60.6739	44.7634	65.5111	56.1082	68.9738	44.761	69.7012	56.1576	91.6899	67.6213	96.347	70.7686	88.1502	73.4088	93.0168	72.998	99.3742	68.8231	18.5771	15.6757	12.8506	11.4877	23.1217	17.9739	23.8929	19.1738	20.9319	12.7609	31.1895	28.0957
EXPH5	0.0231305	0.00117956	24	8	17.3334	0.209577	0.0947331	24	7	14.7701	N	N		259.391	217.355	265.275	223.21	295.528	224.463	281.578	233.952	288.7	252.019	241.868	239.151	240.247	237.266	222.857	213.496	200.64	202.636	231.84	172.975	225.522	159.566	230.13	200.57	142.606	110.652	120.973	109.134	132.623	107.383	130.492	127.985	101.439	119.405	116.738	100.123
TTC5	0.0231305	0.00117956	24	4	16.5298	0.800656	0.513638	24	4	3.0689	N	Y		287.352	268.321	293.176	264.439	284.858	276.664	272.605	290.539	280.116	258.098	266.699	243.841	259.526	258.793	247.053	248.795	249.807	249.229	262.412	241.321	217.185	265.32	259.768	255.137	231.667	230.064	233.083	216.352	219.874	241.496	215.771	220.499	229.715	223.315	220.109	223.744
ZKSCAN5	0.0231305	0.00117956	24	4	15.5226	0.800656	0.513638	24	13	13.4395	N	Y		422.855	433.211	457.148	447.841	448.164	443.706	433.263	432.853	395.777	425.02	397.749	420.753	421.667	435.689	405.813	406.153	420.152	396.041	406.612	389.404	426.473	383.239	420.597	429.653	483.004	486.869	436.477	500.195	467.669	476.54	510.572	512.42	549.597	506.789	446.901	494.995
LONRF1	0.0231305	0.00117956	24	15	15.0713	0.588623	0.349965	24	4	15.3108	N	Y		161.743	174.883	144.227	180.558	159.595	164.669	151.258	168.074	193.822	190.768	208.761	187.996	202.183	176.428	210.123	187.979	198.157	189.009	211.459	199.132	197.002	186.238	186.109	189.755	266.636	279.857	259.227	209.651	235.58	218.913	218.712	246.384	276.946	240.178	215.207	236.515
BRF2	0.0231305	0.00117956	24	6	11.7723	0.977574	0.654469	24	6	2.79685	N	Y		100.229	105.929	115.897	95.7289	100.211	101.079	104.684	110.219	101.203	102.865	91.5053	109.558	86.0142	98.2758	82.3511	88.0353	84.4278	80.8784	96.3028	86.0655	81.609	92.6513	92.8364	83.0793	89.6071	89.9047	93.499	96.2098	96.4132	95.4001	94.8363	98.7452	88.0215	100.264	91.7862	92.9713
ZNF57	0.0231305	0.00117956	24	6.5	11.0198	1	1	24	6.5	3.00478	N	Y		92.486	98.934	97.8683	99.0463	97.8908	96.3339	98.2747	89.949	100.3	87.9028	87.3668	96.3427	90.9576	87.5123	84.4736	84.2077	77.9715	76.0433	80.5071	89.4406	75.9052	72.998	76.7099	84.0625	107.091	100.509	107.236	108.655	87.2517	93.5566	101.82	99.2245	105.733	95.2507	91.7862	99.6121
SLC50A1	0.0231305	0.00117956	24	18	9.88906	0.267118	0.129367	24	19	10.0518	N	Y		266.274	263.324	288.454	278.656	283.002	272.393	286.706	279.138	268.369	285.217	294.288	285.618	296.106	294.827	299.266	294.727	296.987	283.514	314.895	305.87	300.988	297.607	292.021	296.922	349.14	324.118	341.205	318.785	351.624	347.496	333.398	351.36	301.635	320.389	344.421	333.573
MPND	0.0231305	0.00117956	24	18	9.39264	1	0.825244	24	13	3.93512	N	Y		56.7821	41.972	52.3681	55.9209	55.2086	44.1333	61.5285	53.6316	59.1858	57.0433	53.7996	48.5976	68.2182	62.7093	56.8817	65.0696	68.5355	71.6477	79.488	74.2526	71.0788	66.4469	80.1967	65.8735	42.0716	35.9619	50.9592	50.2589	46.2434	60.374	57.7105	42.6618	55.2818	51.4992	57.0322	48.0181
TRPM6	0.0231305	0.00117956	24	5	7.19511	0.383165	0.201719	24	0	6.49123	N	Y		97.648	95.4364	107.741	101.416	85.3645	95.8594	92.72	92.9051	93.5227	96.7866	91.5053	90.8008	90.4632	87.0443	84.4736	83.7824	89.3941	81.318	76.4308	75.0964	86.8741	75.3377	90.6571	73.739	172.111	165.517	148.889	162.743	156.617	168.218	157.325	174.961	154.574	155.865	142.58	152.739
TUBB4B	0.0259313	0.00150497	24	6.5	380.145	0.0413187	0.0109801	24	11	244.049	Y	N		4552.46	4019.82	4795.12	4000.24	4418.54	4265.74	4512.09	4828.95	4241.5	4285.73	4204.18	4332.86	3570.58	4257.21	3681.6	4193.37	3446.14	4194.69	3555.56	3675.5	3811.93	3644.28	3356.93	3009.54	2594.23	2354.58	2773.07	2805.88	3178.58	3046.81	3118.2	2978.65	3149.45	2884.41	2747.79	3085.42
EBNA1BP2	0.0259313	0.00150497	24	5	232.007	0.209577	0.0947331	24	1.5	102.553	N	N		2345.7	2315.46	2385.32	2065.28	2082.62	2181.51	1834.75	1988.59	1790.48	1869.81	1891.26	1999.75	1836.95	1834.01	1671.64	1757.3	1527.15	1695.81	1393.08	1685.45	1454.48	1704.69	1398.21	1574.57	2227.61	2278.97	2138.51	2275.53	2101.02	2016.31	2056.63	2025.71	2583.22	2082.76	1767.11	1795.57
GPX4	0.0259313	0.00150497	24	17	177.672	0.0553194	0.0163087	24	15	87.2526	N	Y		1724.54	1672.88	1938.05	1769.56	1946.68	1832.24	1946.69	1965.36	1948.62	2034.39	1990.58	1902.55	2013.92	2070.81	2185.28	2051.61	2239.82	2163.94	2153.82	2329.67	2194.67	2412.21	2126.96	2269.2	1290.56	1288.63	1426.41	1267	1417.4	1442.06	1438.72	1290.88	1489.92	1344.9	1533.19	1332.76
TMEM2	0.0259313	0.00150497	24	17	133.98	0.0553194	0.0163087	24	20	91.0382	N	N		592.341	535.643	525.398	580.06	542.807	532.447	643.485	566.299	713.393	522.274	673.644	593.829	794.396	662.192	838.793	699.179	797.594	705.489	841.758	736.619	859.528	625.63	941.439	688.231	1272.53	1275.26	1055.52	1249.29	1069.71	994.097	1017.1	993.204	1205.46	1027.71	1032.37	1080.92
RPL23A	0.0259313	0.00150497	24	19	126.919	1	1	24	13.5	33.9755	N	Y		2220.09	2138.07	2325.23	2163.85	2167.05	2192.43	2180.42	2199.74	2301.47	2270.51	2287.63	2209.06	2361.44	2218.69	2350.83	2259.15	2414.14	2388.55	2378.02	2440.63	2465.82	2436.54	2454.28	2427.98	2228.16	2560.21	2544.41	2390.89	2345.76	2598.85	2439.65	2431.24	2520.42	2481.08	2524.12	2430.53
OS9	0.0259313	0.00150497	24	17	96.8772	0.476387	0.267231	24	14	37.4846	N	N		987.235	1083.28	983.834	1046.86	1009.06	1067.74	1074.18	1118.66	1057.21	1015.56	1105.42	1122.86	1124.12	1198.5	1077.36	1194.22	1152.69	1195.15	1200.47	1209.98	1184.21	1202.6	1168.08	1233.9	1257.23	1225.47	1242.96	1340.24	1278.24	1246.19	1269.26	1326.83	1362.72	1406.89	1339.37	1328.16
TCF12	0.0259313	0.00150497	24	17	90.5954	0.126438	0.0488609	24	22	40.1387	N	N		1228.99	1169.72	1176.99	1145.43	1150.1	1160.75	1278.43	1190.45	1292.6	1185.29	1321.08	1220.91	1280.82	1258.87	1349.03	1258.01	1406.47	1284.38	1422.12	1311.66	1410.17	1284.95	1376.86	1297.32	1268.7	1206.11	1169.4	1235.41	1176.59	1202.41	1175.16	1212.74	1028.88	1210.91	1190.1	1171.34
ETF1	0.0259313	0.00150497	24	6.5	90.1502	0.110718	0.0410599	24	1.5	76.2305	N	Y		1832.08	1886.24	1858.64	1774.3	1709.15	1807.57	1674.94	1812.92	1640.94	1722.99	1700.43	1781.06	1628.34	1669.75	1612.21	1608.45	1614.06	1603.5	1507.22	1573.65	1572.07	1547	1605.24	1565.23	2065.88	2137.89	1932.46	2057.74	1910.38	1817.21	1868.42	1897.73	2172.09	1845.77	1755.97	1818.05
PRELID1	0.0259313	0.00150497	24	4.5	78.6451	0.143413	0.0579452	24	5	121.873	N	N		1827.35	1685.88	1919.16	1651.56	1820.49	1733.54	1543.34	1608.95	1503.59	1560.28	1575.36	1519.74	1493.88	1505.96	1515.43	1472.36	1413.42	1481.75	1310.02	1441.6	1302.67	1555.89	1219.08	1459.05	1752.26	1899.06	1940.88	1790.17	1825.31	1944.87	1818.43	1799.94	1932.72	1887.24	1657.05	1710.26
DIS3L	0.0259313	0.00150497	24	5	73.3701	0.126438	0.0488609	24	4	27.8916	N	N		714.938	668.554	693.234	624.134	652.296	634.475	561.447	617.819	564.299	603.631	600.992	608.749	562.058	572.34	514.058	534.166	506.567	551.644	470.814	514.284	507.205	507.242	494.256	530.921	307.068	299.221	327.468	349.419	335.919	305.096	303.623	348.484	270.505	318.566	258.427	267.676
SDC1	0.0259313	0.00150497	24	5	66.9238	0.209577	0.0947331	24	13.5	109.388	N	N		942.927	892.905	956.362	978.615	951.072	915.41	871.654	909.203	807.819	892.588	887.463	849.606	866.568	855.936	851.527	822.088	758.857	832.52	712.845	768.261	650.24	823.567	581.862	763.445	739.805	724.77	804.712	942.473	872.954	977.966	836.251	940.476	715.979	1139.82	888.9	976.709
NOP16	0.0259313	0.00150497	24	5	64.9715	1	0.825244	24	21	20.9584	N	N		478.346	546.136	491.058	484.332	438.885	503.499	386.689	493.664	424.241	460.087	418.441	471.482	410.792	434.753	395.2	407.004	359.563	383.293	354.129	393.201	337.405	403.361	342.579	368.204	584.631	569.396	535.736	520.778	525.692	530.922	514.248	499.957	695.584	498.129	509.28	501.125
F2R	0.0259313	0.00150497	24	16.5	62.7001	0.0964854	0.0343842	24	16	19.3821	N	N		152.709	181.879	145.085	191.932	160.522	204.057	193.986	224.239	196.985	206.665	235.431	238.299	230.854	251.773	241.535	315.991	281.095	304.173	291.966	311.355	299.672	282.165	312.07	371.153	116.926	123.561	139.141	126.844	136.113	148.861	136.373	159.143	135.252	159.055	152.828	145.587
RNF150	0.0259313	0.00150497	24	17	60.1836	0.529975	0.306247	24	18	5.46816	N	N		105.821	96.9354	104.307	91.9377	119.232	100.13	160.23	113.175	151.353	128.114	149.903	145.793	182.904	161.453	204.18	161.611	223.485	190.768	235.916	200.819	220.695	202.616	254.101	234.49	67.7517	51.6376	68.6841	72.277	76.7815	50.2348	65.0621	64.7117	44.5474	64.2601	77.0826	65.3864
DERL1	0.0259313	0.00150497	24	4.5	52.4417	1	1	24	11.5	16.4849	N	N		1497.41	1598.43	1543.57	1525.03	1487.85	1623.92	1448.06	1516.89	1461.12	1492.95	1454.89	1539.35	1415.77	1472.27	1421.62	1448.97	1371.7	1416.69	1347.22	1446.24	1352.25	1452	1357.24	1447.74	1638.61	1599.84	1639.11	1728.43	1568.35	1644.85	1668.09	1685.38	1771.7	1796.55	1629.87	1738.36
XPO5	0.0259313	0.00150497	24	7	49.0667	0.00909082	0.00117956	24	2	71.0376	Y	N		1327.5	1199.2	1280.44	1270.07	1297.63	1240.48	1248.94	1288.85	1238.38	1300.77	1243.37	1217.5	1167.62	1213.47	1177.96	1177.63	1204.34	1168.78	1173.98	1186.78	1088.56	1144.57	1090.5	1107.56	1439.18	1473.52	1368.36	1305.77	1306.16	1324.54	1257.87	1348.4	1444.3	1234.61	1205.7	1289.85
TRIM58	0.0259313	0.00150497	24	6	47.1412	1	0.923131	24	6	13.7847	N	N		364.782	301.299	376.02	328.89	337.283	321.746	343.107	315.877	297.736	301.114	296.587	287.323	297.589	279.852	303.935	257.727	262.223	267.25	252.731	232.461	250.97	258.301	231.001	231.541	190.142	204.706	175.477	215.395	210.713	209.235	190.775	214.747	172.286	205.541	181.345	194.116
PARP14	0.0259313	0.00150497	24	18	46.9969	0.427453	0.232515	24	16	38.6048	N	Y		705.045	778.481	648.592	738.819	656.472	718.471	744.751	719.17	737.338	778.501	767.909	741.327	801.811	764.211	766.205	760.846	851.727	790.323	853.987	815.935	863.038	798.766	877.805	849.474	695.001	699.413	717.86	685.914	717.209	694.07	785.157	747.3	820.102	749.701	855.928	798.429
UBE3C	0.0259313	0.00150497	24	5	46.1211	0.0642263	0.0197614	24	3	61.1261	N	Y		793.229	803.464	789.814	809.905	798.9	825.245	747.742	804.051	745.471	793.931	758.712	805.271	754.355	720.221	783.185	725.122	724.589	726.587	710.297	730.291	707.717	754.313	728.744	761.478	929.947	1014.31	938.535	951.568	948.863	947.088	912.708	960.609	983.801	938.835	857.711	855.642
SPTAN1	0.0259313	0.00150497	24	16.5	42.6999	0.0553194	0.0163087	24	17	101.448	N	N		554.056	526.149	559.309	531.722	587.345	577.055	627.676	535.049	600.443	661.142	618.005	635.606	691.08	589.187	663.054	631.558	664.496	668.126	708.259	650.976	661.648	655.11	659.443	642.513	678.063	625.184	585.809	686.871	618.615	609.731	653.562	736.754	645.133	788.439	775.281	797.918
EMC7	0.0259313	0.00150497	24	6	40.0572	1	1	24	11.5	1.41312	N	Y		541.151	526.149	470.454	472.958	476	483.568	487.101	492.397	464.451	475.517	462.584	438.231	455.776	445.985	400.719	429.544	403.267	443.952	419.35	434.124	408.484	401.489	398.368	399.666	492.292	548.649	506.933	554.762	513.476	507.879	504.323	539.743	588.241	489.926	477.199	507.255
SPAG1	0.0259313	0.00150497	24	5	33.6991	0.724874	0.45321	24	5	8.58936	N	N		254.659	268.321	222.779	248.8	208.308	228.734	204.24	222.128	193.371	183.754	178.412	217.41	191.802	183.916	171.494	190.53	158.426	170.108	164.071	153.568	157.514	176.412	162.137	162.717	212.544	224.531	194.531	233.105	194.135	197.252	200.333	222.416	205.562	210.554	208.078	215.06
KLF7	0.0259313	0.00150497	24	19	30.9896	1	1	24	9.5	9.80021	N	Y		522.223	564.624	506.082	555.891	488.526	503.974	506.328	563.765	521.378	579.317	530.639	537.984	516.085	535.369	570.09	538.419	588.511	561.314	595.141	579.676	581.355	578.369	574.888	586.471	562.23	569.858	517.125	517.427	520.457	506.957	509.102	536.867	452.988	470.329	465.614	457.705
UBE2L6	0.0259313	0.00150497	24	17	29.9571	0.0738391	0.0238555	24	18	38.8605	N	Y		218.525	266.822	240.807	294.295	263.053	262.902	282.433	283.783	306.772	326.363	299.806	290.733	283.254	321.97	299.69	318.118	324.799	370.546	343.429	389.404	325.559	367.798	323.838	336.742	215.822	212.544	256.125	186.197	238.197	257.626	262.086	240.152	235.618	246.558	306.102	267.165
SEC11C	0.0259313	0.00150497	24	5	29.7873	0.588623	0.349965	24	9	9.94507	N	N		262.832	294.803	262.699	268.704	244.495	281.884	246.541	255.489	251.653	245.006	223.935	254.072	212.564	230.246	227.527	219.025	204.613	220.657	205.854	213.054	209.288	206.36	205.722	224.658	296.687	324.118	337.66	375.745	314.543	330.905	328.619	349.443	310.222	350.924	340.856	352.474
FAM134C	0.0259313	0.00150497	24	16.5	28.7063	1	1	24	17.5	9.27847	N	Y		714.938	677.049	714.267	695.693	721.423	710.878	689.632	739.018	715.2	720.523	736.181	729.391	739.03	710.394	756.866	826.766	813.487	818.455	754.627	734.088	756.858	758.524	776.252	741.815	745.815	742.751	734.699	767.285	764.761	774.723	756.485	745.862	787.899	794.364	736.517	802.005
ORC5	0.0259313	0.00150497	24	5	25.5774	1	1	24	6.5	0.149209	N	Y		382.849	342.771	345.114	361.59	345.633	371.574	318.324	367.82	328.911	353.014	309.922	349.988	310.442	328.522	321.339	339.808	307.416	307.69	310.819	298.276	324.681	308.838	336.913	302.822	392.851	361.463	373.996	392.498	344.208	356.713	378.61	383.476	368.187	379.18	342.193	371.374
CSPG4	0.0259313	0.00150497	24	6	25.4584	1	1	24	11.5	3.33055	N	N		199.168	198.867	202.604	204.253	211.092	210.701	215.35	198.057	203.762	168.325	203.703	195.669	174.006	166.601	187.625	168.415	178.788	176.262	159.486	156.943	155.759	174.54	134.678	151.902	401.593	353.625	364.247	315.913	346.389	319.383	336.706	330.269	403.611	357.76	357.342	389.253
TBL2	0.0259313	0.00150497	24	7	24.8359	1	0.825244	24	13	9.52847	N	N		384.57	365.256	415.511	368.225	411.513	367.303	409.763	393.157	394.422	407.252	391.771	414.359	391.019	385.148	361.241	383.187	355.59	374.942	367.377	356.919	384.791	360.311	365.244	363.288	352.964	315.819	363.804	357.077	354.678	348.418	369.053	361.427	371.408	393.308	371.6	383.634
OSBPL2	0.0259313	0.00150497	24	17	24.5677	0.427453	0.232515	24	17.3333	12.5601	N	Y	A	176.369	169.387	172.557	187.193	167.945	165.618	194.84	183.276	193.822	202.457	200.484	176.06	219.979	192.34	224.555	203.715	217.526	201.317	224.707	243.008	200.074	207.764	225.771	217.776	137.689	148.458	149.333	158.914	161.416	162.687	142.622	161.539	150.817	157.232	182.681	177.258
SLC1A3	0.0259313	0.00150497	24	17	22.5771	1	1	24	11.5	1.65093	N	Y		200.888	206.362	166.548	220.366	187.895	197.888	204.668	216.215	222.286	232.849	214.279	237.873	239.752	242.414	227.951	219.025	245.337	238.24	249.674	249.337	213.675	247.538	228.386	248.746	59.0095	52.5597	58.0492	52.6521	61.9487	46.5479	57.3429	48.8932	69.2364	59.2469	60.5967	54.1481
ATF6B	0.0259313	0.00150497	24	19	22.3934	0.162817	0.0684872	24	16.6667	21.3223	N	Y		202.609	175.383	186.722	187.193	187.431	158.026	193.558	192.989	221.382	174.871	207.381	182.454	209.104	215.739	220.735	211.795	229.942	208.789	252.222	216.851	234.736	239.115	230.565	224.658	189.049	179.348	203.394	177.103	177.994	187.113	175.705	180.234	187.851	236.532	224.564	203.311
SEPT8	0.0259313	0.00150497	24	17.5	21.0188	1	1	24	10.5	5.04408	N	Y		252.508	287.808	286.308	295.717	276.043	292.324	290.124	312.077	305.869	293.633	293.828	303.522	293.14	313.547	321.764	307.486	344.664	321.316	351.582	330.762	336.528	319.132	343.015	324.943	399.954	413.562	393.494	366.65	368.202	414.322	384.124	376.286	373.018	386.472	358.233	379.548
EIF1AD	0.0259313	0.00150497	24	5	18.591	0.209577	0.0947331	24	3	21.1212	N	Y		312.302	324.284	326.228	341.212	342.386	347.372	321.315	335.725	279.213	321.219	313.601	282.634	321.812	317.29	297.992	298.129	287.551	291.866	290.947	279.713	303.621	308.838	265.434	275.292	334.387	319.046	335.888	344.632	325.885	329.522	309.505	314.451	369.261	316.743	277.586	277.381
CLSTN3	0.0259313	0.00150497	24	15	18.0819	0.126438	0.0488609	24	17.5	37.3058	N	N		117.866	124.917	139.934	138.38	133.614	143.789	148.694	141.891	168.07	139.803	183.011	133.43	166.591	171.281	173.617	168.415	180.278	161.757	152.862	166.225	169.361	159.098	164.316	155.344	152.441	154.452	160.411	150.298	167.087	176.974	177.175	177.358	136.863	216.935	210.306	214.038
LIMD2	0.0259313	0.00150497	24	20	15.1266	0.184819	0.0806795	24	20	12.4055	N	N		90.7654	81.9454	88.4248	83.8813	79.3333	80.1992	106.393	83.6146	85.8421	71.0704	85.0677	79.2909	98.3726	87.9803	105.274	99.5182	105.286	112.966	100.889	100.832	108.373	111.837	120.731	108.642	215.276	219.921	214.915	207.737	189.336	251.635	194.451	187.903	211.466	231.519	216.99	245.71
SLC4A8	0.0259313	0.00150497	24	9	10.1056	0.00409101	0.000323018	24	13	22.8931	Y	Y		105.821	109.427	111.604	102.364	141.037	113.892	129.039	119.087	134.185	114.554	123.693	121.068	125.561	117.463	107.396	113.978	106.776	109.45	114.646	106.738	102.669	99.6703	121.603	98.3187	101.628	108.347	124.961	109.612	125.643	118.904	132.33	155.787	116.467	136.724	156.839	179.302
GMPR2	0.0259313	0.00150497	24	19	9.4652	0.0964854	0.0343842	24	13	36.5914	N	Y		306.709	319.787	291.029	321.308	338.674	324.119	296.106	323.479	315.808	333.844	325.556	317.59	338.619	330.394	324.735	334.279	327.778	354.722	367.887	368.732	356.71	365.926	354.347	364.762	444.211	436.614	472.37	463.817	485.12	477.001	474.917	510.024	484.118	536.868	547.598	545.568
CECR2	0.0259313	0.00150497	24	18	8.48809	0.0642263	0.0197614	24	19	4.35109	N	N		77	70.453	64.8163	72.9815	66.3431	74.5046	79.047	65.4558	75.4507	76.6812	76.331	82.2749	86.5085	84.2364	73.8613	83.7824	83.4345	83.0762	96.8124	88.5968	96.5268	94.0551	88.042	94.386	69.3908	78.3785	73.1154	67.9691	64.5663	83.4175	60.6511	59.4388	48.8412	71.0962	61.0423	66.9189
RBPMS	0.0259313	0.00150497	24	2	2.34487	1	1	24	16.5	0	N	Y		17.6369	7.495	10.7312	11.8476	12.0624	11.3892	9.40019	11.402	7.68061	8.41623	8.27686	11.0837	7.41502	7.0197	7.64082	5.52879	7.94614	8.79113	5.60493	6.32835	10.0914	10.2946	10.8963	13.7646	11.4741	10.6041	13.2937	9.57312	13.524	12.9044	10.2923	12.9423	12.8812	10.0264	9.35684	12.7708
SESN3	0.0290043	0.00191087	24	17	182.343	0.126438	0.0488609	24	18.5	119.192	N	N		388.871	390.24	421.091	443.102	537.24	414.758	646.904	462.414	664.598	501.233	618.005	569.956	676.25	645.813	742.009	722.995	795.111	733.62	840.739	766.995	840.222	719.685	1043.43	840.625	332.202	357.775	377.098	327.401	377.8	376.992	394.784	388.27	359.6	460.303	562.302	519.515
MBNL1	0.0290043	0.00191087	24	5.5	134.084	0.000528277	7.75784e-06	24	20.5	91.1012	Y	Y		1908.22	2018.65	1839.75	1907.94	1742.55	1927.15	1754.42	1823.9	1619.7	1746.83	1724.81	1853.96	1723.74	1731.99	1672.49	1697.34	1558.44	1634.27	1533.2	1519.22	1533.46	1653.69	1597.4	1765.31	705.382	686.503	618.6	750.532	624.722	615.262	616.804	619.794	609.71	617.535	595.274	558.339
PLAC8	0.0290043	0.00191087	24	18	118.4	1	1	24	14.5	1.11699	N	N		438.771	453.698	522.823	524.14	547.446	511.566	540.083	566.721	622.129	645.244	614.787	561.43	655.982	569.064	698.711	600.937	757.367	661.093	788.766	767.417	755.542	705.647	781.046	750.663	100.535	108.347	144.015	118.707	143.965	143.791	124.978	144.762	120.761	145.838	171.097	142.522
VCL	0.0290043	0.00191087	24	17.5	99.2956	1	0.825244	24	1	59.9263	N	N		1159.73	1248.17	1166.26	1228.84	1169.12	1244.75	1263.9	1220.01	1186.43	1245.6	1253.48	1329.61	1334.21	1357.14	1309.98	1385.17	1395.04	1306.8	1563.26	1364.81	1454.92	1330.34	1414.77	1412.35	2000.86	1889.84	1700.26	1921.32	1634.66	1590.46	1666.25	1790.36	1615.52	1726.36	1650.37	1709.75
PLK1	0.0290043	0.00191087	24	6	94.7677	0.0123443	0.00191087	24	10.5	68.3342	Y	N		744.19	577.115	828.446	566.317	867.099	669.592	832.771	720.859	697.128	693.404	642.376	683.777	562.058	687.931	558.205	646.017	533.385	620.215	571.703	494.455	651.556	575.561	578.811	523.056	350.233	304.293	399.254	363.778	442.366	468.244	471.609	471.676	424.006	483.546	409.028	459.237
AKT3	0.0290043	0.00191087	24	17	83.6982	0.887308	0.580561	24	22.5	17.9003	N	Y		1360.19	1372.09	1368.87	1401.81	1369.54	1324.95	1416.86	1349.23	1546.51	1444.32	1484.32	1402.51	1510.69	1417.04	1630.89	1470.23	1659.25	1493.17	1734.47	1441.18	1658.07	1421.12	1774.79	1492.97	1000.98	1009.7	932.775	917.105	969.367	909.297	950.201	926.575	831.373	875.942	990.934	912.855
RPL7L1	0.0290043	0.00191087	24	7.5	64.2844	0.977574	0.654469	24	2	40.5016	N	N		1137.79	1175.22	1202.32	1108.94	1213.2	1176.89	1122.89	1123.31	1150.74	1167.52	1138.07	1231.57	1169.6	1083.37	1082.45	1124.47	1078.69	1055.38	1047.1	1074.13	1074.96	1044.43	1067.4	1049.55	1316.24	1450.46	1355.96	1385.23	1296.56	1355.42	1335.8	1323.47	1640.74	1390.48	1267.63	1291.89
DIP2C	0.0290043	0.00191087	24	18	60.7899	1	1	24	15.5	0.314865	N	N		127.76	124.417	124.911	133.641	134.542	121.011	160.658	130.489	169.425	128.581	161.859	153.04	184.387	187.66	196.539	201.163	218.022	196.482	219.611	236.68	227.716	236.776	282.868	257.103	96.7101	80.2227	96.1578	101.475	103.393	92.6349	100.35	84.3648	79.434	86.1358	106.044	95.0146
DIMT1	0.0290043	0.00191087	24	5.5	59.3666	0.236964	0.110879	24	1	45.3435	N	Y		488.24	500.167	491.488	490.018	469.969	512.99	459.755	483.106	443.668	475.984	404.187	471.056	431.554	456.281	410.907	414.659	374.959	399.997	354.129	383.92	347.497	399.149	342.143	367.712	677.517	691.575	658.038	646.664	639.991	619.409	626.361	627.943	766.967	592.924	596.165	571.62
TIMM10	0.0290043	0.00191087	24	6	58.5337	1	1	24	10.5	2.80868	N	N		816.458	729.514	859.352	688.111	834.16	736.504	739.196	744.507	749.537	720.055	761.931	696.992	703.932	686.995	674.091	682.167	639.168	720.873	630.809	668.273	655.066	651.367	610.192	589.912	581.9	558.792	631.451	642.835	637.374	675.175	605.776	603.975	630.105	597.938	576.56	593.075
PKP4	0.0290043	0.00191087	24	6	57.7185	0.0964854	0.0343842	24	6	69.3457	N	Y		1412.67	1465.52	1406.21	1382.38	1351.45	1363.39	1380.12	1433.69	1357.66	1348.93	1350.05	1432.78	1333.71	1358.08	1295.97	1346.9	1289.76	1300.65	1242.26	1288.45	1280.74	1369.18	1323.68	1300.76	1049.06	1036.44	1010.76	1025.28	1066.65	1059.54	1028.5	1101.54	870.017	1040.92	998.955	940.44
TRAK1	0.0290043	0.00191087	24	17	54.63	1	0.735861	24	20	3.08026	N	N		423.715	425.217	373.015	458.267	422.647	440.858	478.555	456.079	510.083	491.882	492.473	483.845	501.75	534.433	490.711	529.062	503.09	559.116	535.525	584.317	520.367	559.183	563.556	567.791	572.611	627.489	645.188	600.713	636.065	606.044	598.057	611.645	505.587	565.124	592.155	600.737
DCUN1D5	0.0290043	0.00191087	24	6	53.8259	1	1	24	9.5	3.95044	N	N		622.883	691.039	609.53	658.255	600.799	633.052	567.429	662.16	579.208	608.774	539.835	612.16	573.428	584.507	556.082	559.683	519.479	538.457	518.71	534.112	532.653	522.684	496.871	535.837	633.26	699.874	646.074	658.152	623.414	636.462	635.183	621.232	693.437	609.787	618.443	630.877
PDCD11	0.0290043	0.00191087	24	7	46.0443	0.126438	0.0488609	24	22	51.6666	N	Y		1001.86	949.867	984.263	952.55	960.815	983.271	967.792	981.415	964.594	971.607	958.276	1005.63	946.156	968.251	896.948	904.169	841.298	890.981	898.826	916.766	849.875	848.836	835.527	844.066	1135.93	1098.22	1020.96	1047.3	1004.7	961.836	994.679	989.849	1072.36	998.993	943.705	1001.74
ZNF45	0.0290043	0.00191087	24	5.5	45.2959	0.267118	0.129367	24	6	22.1777	N	Y		439.201	412.725	397.912	403.768	391.563	438.011	388.399	405.826	370.476	359.56	405.106	378.55	384.098	343.497	360.392	333.854	335.725	334.063	326.105	312.62	312.835	340.189	331.247	328.876	396.129	376.678	376.212	388.669	387.834	359.479	381.551	390.667	362.82	398.321	314.568	332.04
IMPA1	0.0290043	0.00191087	24	3.5	45.1487	1	1	24	13.5	6.8846	N	N		888.296	878.914	917.3	881.938	888.44	827.143	871.226	812.919	846.674	776.163	827.686	769.462	844.818	758.128	826.907	765.95	810.01	716.477	812.205	746.323	836.712	747.294	842.501	773.768	798.268	809.142	780.34	841.477	787.883	789.931	799.125	783.73	921.542	798.921	849.691	800.472
PUS7	0.0290043	0.00191087	24	6.5	44.7285	1	1	24	13.5	5.24478	N	Y		492.542	524.65	495.351	491.44	485.279	516.312	461.464	527.447	454.059	497.96	486.036	517.522	474.561	453.005	428.735	475.05	406.247	459.776	371.963	415.983	396.638	426.29	384.857	423.754	492.839	501.622	412.991	452.808	446.293	453.035	441.467	449.626	512.564	416.095	425.959	428.077
JAKMIP2	0.0290043	0.00191087	24	17.5	42.1455	1	1	24	15.5	6.98636	N	N		198.307	181.879	182.859	179.136	189.287	181.279	212.786	192.567	247.135	201.054	217.957	230.626	259.526	234.458	240.261	259.002	218.519	260.657	274.132	264.525	260.622	259.236	277.202	264.969	156.812	182.576	169.716	175.667	171.45	178.818	181.953	178.317	116.467	195.059	202.286	199.224
TRAK2	0.0290043	0.00191087	24	5	41.642	0.209577	0.0947331	24	0	18.0424	N	Y		1021.22	979.847	988.126	993.306	991.434	1006.05	939.164	996.618	942.456	951.501	935.285	984.315	963.952	967.315	941.519	925.859	859.177	968.783	885.069	906.219	925.341	913.879	929.236	992.036	1157.24	1225.01	1102.05	1102.34	1140.82	1111.62	1112.67	1125.02	1073.43	1066.9	1121.93	1122.81
YIPF3	0.0290043	0.00191087	24	18	40.8315	0.0353345	0.00895623	24	14	56.1182	Y	Y		526.525	477.682	526.257	513.24	546.054	523.905	533.674	508.444	548.034	511.52	560.067	525.195	581.337	535.837	598.956	536.292	645.128	570.984	616.542	569.973	606.364	620.015	664.674	595.811	607.033	592.449	681.967	629.432	629.958	663.653	642.535	644.72	674.116	729.192	728.052	689.622
CORO1B	0.0290043	0.00191087	24	18.5	40.4111	0.302769	0.150471	24	18	28.5593	N	Y		421.564	380.746	435.686	418.459	425.431	386.759	433.69	406.671	468.517	405.382	434.995	402.422	445.395	478.276	460.996	463.568	539.345	469.007	473.362	498.674	488.777	513.326	496.871	510.766	526.715	517.759	594.228	560.985	539.216	566.409	554.315	566.586	555.501	623.915	561.856	600.737
PDE7A	0.0290043	0.00191087	24	17	38.7013	0.00184834	7.67819e-05	24	5.5	30.7613	Y	N		337.682	335.276	325.369	384.337	344.706	333.135	370.025	340.793	370.025	352.079	382.115	355.956	379.155	381.404	421.519	393.394	385.388	419.777	410.688	403.748	393.127	403.361	424.955	421.787	312.532	314.436	301.324	324.529	302.327	324.913	324.576	335.063	298.414	297.146	295.855	307.01
DYSF	0.0290043	0.00191087	24	17	36.7317	0.110718	0.0410599	24	19	3.3179	N	N		90.7654	51.4657	89.7126	68.2424	88.6121	71.1827	123.057	61.2329	117.468	81.8244	114.956	90.8008	131.987	118.867	152.816	102.92	155.446	123.515	147.257	121.926	146.545	111.837	161.701	117.982	54.0921	52.5597	50.9592	57.9174	63.2575	61.7566	53.6671	58.9595	45.6209	38.2826	65.0523	48.0181
KIAA0355	0.0290043	0.00191087	24	18	36.286	0.162817	0.0684872	24	21	4.75063	N	N		300.257	272.318	279.44	279.604	307.591	269.545	314.906	273.225	318.971	278.203	360.043	315.032	347.517	323.842	351.053	340.658	348.637	352.964	356.168	367.888	370.751	358.907	425.391	389.342	202.162	196.407	197.633	191.941	195.444	208.774	196.657	185.507	203.952	184.577	208.524	182.367
FLOT2	0.0290043	0.00191087	24	16.5	33.4614	0.267118	0.129367	24	19	9.78743	N	N		284.341	250.833	300.044	262.07	284.858	251.038	293.969	302.786	297.285	297.373	327.396	278.797	327.249	295.763	381.617	317.693	342.181	357.799	353.62	340.887	396.638	336.446	356.091	323.96	286.852	309.825	294.234	274.27	290.985	308.783	308.402	285.69	251.72	273.903	267.338	296.282
MCUR1	0.0290043	0.00191087	24	5	33.4262	0.0553194	0.0163087	24	6.5	22.3187	N	Y		501.575	532.645	547.719	549.731	543.271	541.938	529.829	527.025	556.166	527.417	516.844	523.49	527.949	494.655	514.058	495.039	482.728	486.15	522.277	494.877	482.195	480.57	495.999	477.337	498.849	515.454	496.298	516.47	482.066	514.331	510.572	517.214	543.694	502.687	493.685	486.311
KLHL29	0.0290043	0.00191087	24	19	26.6586	0.0553194	0.0163087	24	20	37.4099	N	Y		323.056	350.766	303.907	361.116	289.961	343.575	328.152	363.174	322.134	351.144	318.199	344.446	354.438	352.857	384.588	353.417	385.885	374.502	357.696	397.42	411.555	418.335	395.317	366.729	472.076	426.01	429.387	405.421	441.494	471.009	426.028	447.229	379.458	418.374	449.129	447.999
AGGF1	0.0290043	0.00191087	24	18	26.2379	1	1	24	7.5	3.92572	N	Y		549.324	563.125	516.813	550.204	516.826	550.954	546.92	545.606	537.191	573.239	521.902	530.737	566.507	570	554.809	574.569	604.9	568.786	641	589.802	607.241	566.67	622.832	621.374	609.219	632.56	575.174	627.996	606.836	562.722	604.674	635.612	582.337	580.619	617.106	564.468
TMED1	0.0290043	0.00191087	24	5.5	24.4699	0.184819	0.0806795	24	12	16.2478	N	Y		375.966	336.775	410.789	345.477	389.244	351.643	358.916	350.505	351.952	354.417	344.869	342.315	356.415	321.502	324.311	320.244	353.107	299.778	313.366	304.604	316.783	343.465	324.274	312.653	220.739	218.999	256.568	255.124	280.078	251.635	266.865	267.475	301.635	279.827	302.984	261.035
PKIB	0.0290043	0.00191087	24	17	23.6446	1	1	24	17.5	2.29199	N	Y		212.933	186.875	200.888	181.032	197.637	198.837	200.395	202.28	199.244	217.419	215.658	222.526	240.741	201.231	233.894	223.703	267.189	200.877	273.113	242.165	270.714	222.27	276.33	232.032	128.4	142.464	162.626	140.725	155.308	129.044	159.531	155.787	179.8	128.976	136.343	148.652
GLOD4	0.0290043	0.00191087	24	5.5	23.1053	0.0844948	0.0286919	24	5	22.6286	N	N		443.073	407.229	468.738	417.985	443.06	437.536	408.481	444.255	411.59	424.552	434.535	428	432.048	409.015	393.927	413.383	392.341	382.854	398.459	397.42	387.862	394.002	405.778	392.292	375.366	409.412	396.152	391.54	406.157	408.331	378.61	392.584	431.52	407.436	375.165	381.08
SUSD5	0.0290043	0.00191087	24	5	19.4533	0.302769	0.150471	24	3	15.6719	N	N		263.263	239.34	232.223	226.053	208.772	208.328	197.404	199.746	201.503	193.573	193.587	193.112	196.251	198.892	185.927	180.324	179.782	174.504	179.867	162.428	173.31	182.027	161.265	176.482	241.502	268.792	205.609	295.809	227.291	243.339	224.593	251.656	227.568	265.244	212.98	229.363
GTF2F2	0.0290043	0.00191087	24	4	19.3584	1	0.735861	24	2	5.74928	N	Y		440.492	452.199	408.214	403.294	407.801	414.758	380.708	395.269	389	364.236	346.249	397.307	381.626	372.512	359.119	353.417	359.563	356.481	342.41	359.028	358.466	331.767	364.372	364.762	486.282	456.9	464.393	469.083	510.423	462.253	462.419	467.362	436.887	482.634	439.772	468.943
BEX4	0.0290043	0.00191087	24	19	19.2752	0.162817	0.0684872	24	2	18.2785	N	Y		234.011	218.354	209.472	229.37	219.906	208.328	215.35	196.79	225.9	234.252	224.855	205.9	213.553	241.01	244.506	249.646	240.371	229.009	254.26	234.571	261.5	246.134	255.845	258.578	391.758	395.581	402.799	424.568	345.517	373.766	353.247	380.121	355.306	404.702	401.008	414.795
CCNH	0.0290043	0.00191087	24	4	19.2703	1	1	24	9.5	0.887572	N	N		309.721	344.27	327.086	338.369	329.396	332.186	311.061	304.053	324.393	331.038	280.494	326.968	303.521	321.034	272.947	310.888	286.061	297.14	289.928	297.432	308.447	294.8	319.915	300.855	350.779	334.261	315.061	324.529	326.321	310.166	321.635	356.154	410.051	336.796	328.826	320.802
EIF2AK3	0.0290043	0.00191087	24	20	17.7356	1	0.825244	24	8.5	8.51124	N	N		413.391	383.245	399.2	382.916	395.739	379.641	402.499	385.556	380.868	392.757	368.78	385.371	395.962	399.655	397.323	384.889	418.166	400.436	450.432	398.686	460.696	422.078	441.953	414.413	363.892	408.951	377.541	374.788	379.981	373.766	384.492	371.972	330.617	418.374	397.443	379.548
NMU	0.0290043	0.00191087	24	10	15.8305	0.000802514	1.54982e-05	24	14	22.9818	Y	Y		220.246	253.831	230.506	250.696	261.661	276.664	303.797	272.803	276.05	283.814	280.953	266.434	282.759	274.704	283.135	268.359	256.263	262.855	246.617	259.462	268.52	241.923	259.332	253.662	81.9577	82.5279	89.5109	73.713	81.5804	76.5044	109.907	103.539	104.66	101.175	124.758	100.634
PC	0.0290043	0.00191087	24	18.5	14.7826	1	1	24	15.5	2.26496	N	Y	CA	131.631	127.915	148.519	95.7289	117.376	124.807	142.712	114.864	135.992	120.633	147.604	142.383	134.953	115.591	137.959	150.128	163.889	150.328	158.976	170.022	162.779	170.329	134.242	150.919	122.937	131.399	121.416	135.46	136.113	139.183	122.773	129.903	121.298	150.852	147.036	152.228
RPL26L1	0.0290043	0.00191087	24	4	14.537	0.476387	0.267231	24	3	7.91672	N	Y		203.899	222.352	215.911	208.518	211.556	202.633	188.431	213.682	171.684	187.027	181.631	190.554	186.364	173.621	172.768	185.852	154.95	181.097	153.371	178.037	156.637	187.642	157.342	181.89	215.822	222.687	237.071	220.182	199.806	217.992	210.257	209.953	211.466	206.908	201.395	192.583
TUBB2A	0.0290043	0.00191087	24	7	12.2805	1	0.735861	24	6	10.7329	N	N		199.168	212.858	222.35	213.731	227.329	224.463	232.868	251.688	207.828	220.692	232.212	218.689	205.643	199.36	191.021	214.772	211.069	208.789	185.472	210.945	205.778	206.36	185.673	197.621	257.894	266.487	260.113	268.526	269.608	247.487	248.118	246.863	273.725	272.991	233.921	246.731
MFSD2A	0.0290043	0.00191087	24	17	10.5223	0.977574	0.654469	24	17.5	7.28276	N	N		24.5195	23.4843	23.1793	23.2214	24.1248	20.4057	32.0461	28.2938	39.3066	23.3784	28.0494	30.6932	34.1091	39.3103	41.1756	34.0233	44.2004	29.4503	45.8585	38.8139	44.7533	39.7745	45.7644	34.9031	37.7005	39.1892	49.1867	46.4296	47.5522	42.8609	37.4934	46.0172	85.8746	50.132	39.6552	46.9965
PIP4K2C	0.0290043	0.00191087	24	6	10.1304	0.143413	0.0579452	24	19	11.5484	N	Y		178.95	185.376	152.383	167.763	163.77	160.873	172.622	164.695	173.04	157.57	174.734	150.056	165.108	152.094	154.514	158.208	146.507	145.493	144.199	143.442	147.423	152.079	150.369	159.276	162.276	150.763	155.093	180.932	145.274	162.226	142.622	146.2	136.326	156.321	154.165	167.553
PPP2R5E	0.0290043	0.00191087	24	7	8.04842	0.724874	0.45321	24	20.5	16.5014	N	Y		457.268	481.179	442.553	433.624	437.493	461.264	464.455	461.992	440.505	456.347	441.892	460.825	423.645	437.561	432.556	423.59	395.321	459.776	392.345	431.171	433.054	412.251	418.853	412.447	444.757	461.511	381.972	420.738	406.593	419.392	386.697	390.187	359.063	384.649	414.375	381.591
CCDC130	0.0290043	0.00191087	24	18	7.47974	0.383165	0.201719	24	10	6.52036	N	Y		92.9162	86.4424	105.595	94.3072	98.3548	90.1648	99.9838	91.2159	91.2637	93.9812	94.724	99.3267	101.833	100.616	95.0858	101.219	113.729	100.658	119.232	110.957	105.302	102.478	100.246	113.558	95.6173	82.989	81.9778	84.2434	89.433	87.1044	100.35	99.7039	115.394	98.4409	97.133	99.6121
BAI1	0.0290043	0.00191087	24	17	2.71563	0.476387	0.267231	24	20.5	3.40102	N	N		14.6257	16.9887	15.8821	21.3258	16.2378	18.033	12.8184	18.581	17.1684	16.8325	18.393	16.6255	17.3017	19.6552	19.5266	29.3451	24.3351	30.3294	19.3625	22.782	21.4992	18.7174	20.9209	21.6301	69.3908	54.8649	66.4685	54.0881	62.385	52.0783	67.2676	54.6454	53.1349	54.6894	60.1511	52.6156
MAPRE1	0.0323992	0.00241479	24	5	111.373	0.126438	0.0488609	24	5	97.7862	N	N		1917.26	1840.27	1894.27	1857.71	1854.82	1849.8	1826.63	1760.97	1766.99	1701.48	1745.04	1798.54	1769.72	1697.36	1723.43	1720.73	1696.5	1633.39	1720.71	1645.37	1656.75	1584.43	1647.95	1654.21	2157.13	2210.27	2025.96	2228.62	2104.08	2167.47	2120.22	2110.08	2245.08	2217.66	2070.98	2154.18
SNRPN	0.0323992	0.00241479	24	18	99.0899	0.143413	0.0579452	24	16	50.6277	N	N		777.743	777.482	798.399	857.295	816.994	828.567	809.698	875.419	871.975	891.185	819.869	886.694	891.285	922.857	920.295	922.457	941.618	985.047	996.148	1022.66	960.003	1063.15	1031.66	1092.81	855.092	820.208	861.432	853.922	888.659	925.888	926.308	934.724	915.638	981.675	1001.63	945.549
PSMA4	0.0323992	0.00241479	24	4.5	96.7682	0.0964854	0.0343842	24	8	54.2608	N	N		2217.51	2209.53	2225.22	2180.91	2080.3	2232.29	2115.9	2148.22	2121.2	2137.72	2120.72	2084.16	2212.64	2002.02	1976	2047.35	2011.37	1991.63	1995.35	2043.63	1945.89	1964.39	2032.38	2076.98	1883.39	1938.25	1935.56	2093.16	1852.79	1967.92	1958.85	1994.08	2075.48	2000.72	2057.17	1974.36
TIMM17A	0.0323992	0.00241479	24	5	92.9226	0.588623	0.349965	24	2.5	26.2833	N	N		1239.74	1303.63	1174.85	1279.07	1172.83	1297.42	1104.95	1228.04	1133.57	1211.47	1104.96	1200.87	1094.95	1154.97	1055.71	1132.13	1039.95	1092.3	1039.97	1092.27	1028.45	1092.63	1049.97	1043.65	1499.83	1529.3	1434.39	1414.91	1402.14	1389.06	1421.81	1474.47	1699.24	1325.76	1398.63	1388.44
SCARB2	0.0323992	0.00241479	24	19	82.3886	0.184819	0.0806795	24	17	66.5699	N	N		1647.97	1871.25	1607.1	1938.27	1699.4	1913.87	1777.49	1831.92	1859.16	1902.54	1842.06	1864.61	1926.42	1951.01	1943.74	2032.04	1908.07	1943.72	2005.04	2018.32	1966.95	2049.09	2032.81	2088.29	1657.73	1671.31	1754.33	1563.29	1608.05	1613.97	1626.92	1690.17	1602.1	1599.21	1757.75	1713.33
LRP10	0.0323992	0.00241479	24	17.5	81.1025	0.0844948	0.0286919	24	16	76.72	N	Y		533.408	506.163	558.45	564.895	575.283	590.817	605.03	622.886	637.49	642.906	605.59	583.598	586.775	642.069	702.107	697.478	696.778	701.533	730.169	718.478	714.737	757.12	651.598	677.907	867.112	867.235	945.182	893.172	832.818	1013.45	878.155	900.211	878.068	980.763	944.15	1065.59
PIM3	0.0323992	0.00241479	24	4	80.8719	0.110718	0.0410599	24	12	27.658	N	N	A	771.29	801.466	875.234	825.544	855.965	890.733	768.252	826.855	692.61	848.169	614.787	779.267	562.058	736.601	682.58	731.076	649.101	726.587	661.891	764.464	687.096	794.087	672.955	677.907	531.632	545.883	636.768	650.015	672.711	636.922	642.535	667.728	907.05	685.896	617.997	643.136
CMSS1	0.0323992	0.00241479	24	5	77.7168	0.588623	0.349965	24	6	35.0789	N	N		1431.17	1307.63	1439.26	1269.12	1426.61	1317.35	1270.31	1263.93	1258.72	1240.46	1371.66	1255.01	1287.74	1191.95	1225.5	1211.23	1235.63	1136.69	1175	1143.32	1262.75	1150.65	1197.72	1142.46	990.049	995.868	1032.48	1041.56	1027.83	1076.13	1031.07	1083.32	921.542	1010.84	955.289	970.579
TIAM2	0.0323992	0.00241479	24	16.5	71.2815	0.162817	0.0684872	24	19	35.2473	N	N		791.078	858.428	820.72	901.368	828.592	853.244	901.991	951.01	951.943	940.747	950.919	937.849	953.571	929.408	1047.64	958.607	995.751	1009.22	1012.45	1016.33	981.502	1032.73	1012.92	1041.69	453.499	455.056	493.639	476.741	481.193	484.835	505.426	488.453	412.198	474.431	535.568	435.228
GTF2H1	0.0323992	0.00241479	24	5	69.8664	0.0553194	0.0163087	24	2	39.4071	N	Y	CA	914.536	991.839	938.334	930.277	865.707	1009.85	849.435	963.257	867.909	948.228	906.776	989.004	831.471	934.088	761.111	859.088	775.246	819.773	794.371	832.81	802.05	886.738	832.912	895.192	1249.58	1293.24	1163.2	1292.85	1086.28	1156.32	1088.78	1183.02	1215.13	1161.69	1071.14	1111.06
MAPK6	0.0323992	0.00241479	24	4	67.137	0.236964	0.110879	24	3	44.193	N	Y		1950.38	1824.28	1928.18	1786.62	1763.89	1758.69	1706.99	1675.67	1636.42	1639.76	1687.1	1676.62	1680.74	1617.34	1633.44	1608.03	1619.03	1588.12	1607.09	1553.82	1645.78	1528.28	1709.41	1579.98	2121.06	2206.58	2025.52	2201.34	2048.23	2001.1	2009.21	2019.96	2138.81	1956.97	1956.47	2030.04
EDEM1	0.0323992	0.00241479	24	17	62.3779	0.887308	0.580561	24	23	16.7275	N	Y		914.966	919.887	903.994	986.671	911.173	952.899	1009.67	970.013	952.395	910.823	979.428	991.988	1001.52	1004.75	1014.96	983.699	1046.9	1062.41	1063.41	1016.33	1100.41	1008.4	1154.57	1041.2	1086.76	1134.64	1036.91	1076.02	1012.12	1059.54	1077.75	999.435	1061.62	1018.13	1046.18	1106.97
TCEAL8	0.0323992	0.00241479	24	18	51.9146	0.427453	0.232515	24	18.5	13.348	N	N		616	629.58	624.554	637.403	666.678	644.441	634.513	608.95	644.267	612.514	671.805	694.861	728.649	663.128	720.784	669.834	756.87	685.708	727.112	707.931	735.798	678.039	788.891	706.911	661.125	637.632	624.804	654.801	589.822	639.688	597.322	669.646	586.094	664.021	686.614	646.712
CADM1	0.0323992	0.00241479	24	18	49.5773	0.588623	0.349965	24	14	85.833	N	N		693.86	632.578	700.102	628.873	719.103	689.998	709.287	644.001	706.164	668.155	727.904	724.701	760.287	716.477	757.715	725.547	700.751	763.95	764.818	767.417	766.072	763.671	756.202	799.823	744.722	664.373	723.177	863.016	769.56	844.314	754.647	837.417	721.883	972.56	932.12	918.985
CHUK	0.0323992	0.00241479	24	4.5	45.6619	0.184819	0.0806795	24	5	17.3067	N	Y		837.106	862.425	838.748	826.965	773.384	824.77	762.697	751.686	756.766	810.296	732.502	771.594	709.864	730.517	692.768	717.466	742.964	683.071	728.131	679.664	705.962	689.737	689.517	722.642	596.652	646.392	596.444	680.17	652.207	614.801	646.21	614.521	686.46	610.243	594.828	583.369
ARL4A	0.0323992	0.00241479	24	3	39.8531	0.00115709	3.0027e-05	24	7	17.2127	Y	N	CA	390.162	402.732	425.384	455.423	404.09	424.249	351.652	408.36	354.663	425.02	311.762	404.98	325.272	374.384	312.425	375.957	326.289	346.371	306.233	371.263	346.619	371.541	371.346	381.477	316.357	353.625	337.217	331.23	342.463	337.818	366.48	372.931	346.719	332.238	331.945	329.997
PLEKHA1	0.0323992	0.00241479	24	18	39.7454	0.0065227	0.00071381	24	2	35.1008	Y	N		473.614	492.672	471.313	497.127	437.957	481.195	467.446	449.323	512.793	493.752	471.781	502.175	559.092	491.847	536.556	516.304	548.284	493.183	570.683	541.706	551.958	510.518	574.452	545.177	477.54	526.058	465.28	483.921	476.394	454.879	479.695	453.461	492.169	415.64	480.764	429.098
QPRT	0.0323992	0.00241479	24	17	39.5956	1	1	24	14.5	13.182	N	N		334.24	319.787	357.563	354.955	349.809	343.575	361.907	350.083	362.796	380.601	381.195	347.857	378.66	368.768	414.302	415.084	430.582	406.15	441.77	449.313	415.504	457.641	354.347	468.489	658.393	670.827	697.033	668.204	660.932	716.192	681.498	680.671	640.302	786.16	781.074	779.018
DNAJC2	0.0323992	0.00241479	24	5	38.4167	0.476387	0.267231	24	16	10.9966	N	Y		477.916	567.122	503.936	484.805	452.339	520.583	437.963	472.127	484.33	494.687	458.446	495.355	432.048	446.921	409.209	453.361	413.199	431.645	430.56	423.999	413.749	419.271	450.235	424.245	407.057	434.309	351.84	386.275	369.947	338.279	393.313	394.501	433.13	370.521	387.195	355.539
GTF3C2	0.0323992	0.00241479	24	6	34.5262	1	1	24	8.5	7.41837	N	Y	A	816.458	740.506	819.861	774.836	794.261	784.908	762.697	826.433	762.639	789.255	781.243	764.347	730.132	781.995	728.85	750.639	760.843	732.302	703.164	718.056	709.472	777.709	705.208	760.495	722.867	761.193	726.279	807.971	764.761	763.662	764.204	736.754	727.25	766.563	681.713	710.566
TMEM70	0.0323992	0.00241479	24	5.5	30.7541	0.0964854	0.0343842	24	3.5	12.9501	N	N		271.436	259.827	260.982	270.6	261.197	272.393	237.996	267.736	215.509	259.5	229.913	252.367	222.451	240.542	236.866	231.784	200.64	221.976	188.529	216.008	194.37	227.885	179.571	217.284	228.389	241.59	238.843	244.593	239.07	211.539	211.36	221.937	257.624	214.656	203.623	207.397
PQLC3	0.0323992	0.00241479	24	17.5	29.1625	1	1	24	16.5	0.0303845	N	N		92.0559	83.944	98.7268	115.159	115.984	94.4357	131.603	111.064	132.829	135.595	136.108	126.183	153.244	137.118	155.788	156.082	178.788	139.779	185.472	145.13	180.768	157.226	205.286	172.549	132.771	139.237	160.411	122.536	143.093	138.261	139.681	135.655	113.784	134.901	154.165	135.881
BBC3	0.0323992	0.00241479	24	16	27.8684	0.0844948	0.0286919	24	14	22.195	N	N		186.693	200.866	192.303	200.462	216.195	221.141	203.386	202.28	214.605	202.925	223.475	216.132	224.428	214.335	252.572	259.428	250.8	267.25	237.955	254.399	246.143	299.479	224.464	283.158	386.84	378.522	469.711	463.817	471.596	469.166	496.604	467.362	505.05	561.934	519.082	515.94
UBE2N	0.0323992	0.00241479	24	4	26.8296	0.340741	0.174483	24	7.66667	26.3412	N	N		763.547	781.979	773.503	778.153	750.651	784.908	731.078	786.315	749.537	785.515	725.605	753.69	742.491	716.477	723.756	704.282	715.65	706.807	734.755	753.917	739.308	752.441	733.538	727.067	777.505	763.959	731.597	744.788	717.209	705.131	725.976	700.324	833.52	692.733	752.112	704.947
HMBOX1	0.0323992	0.00241479	24	17	23.6686	1	1	24	15.5	2.40828	N	N		165.184	149.4	142.081	140.75	156.811	140.942	162.367	126.689	171.232	149.154	171.055	156.877	188.836	154.433	193.568	167.99	194.681	169.669	221.14	169.178	204.023	164.245	221.413	182.873	132.771	118.951	136.482	120.621	134.804	124.435	121.302	133.737	106.27	125.786	138.57	122.089
CHCHD7	0.0323992	0.00241479	24	7	22.2075	0.0642263	0.0197614	24	8.5	17.631	N	Y		446.514	413.225	433.539	407.559	410.585	423.774	394.808	420.184	427.855	452.138	407.865	409.669	417.713	403.399	373.976	383.187	370.489	402.634	388.778	380.966	370.312	377.624	392.702	382.46	473.715	519.603	506.047	522.692	506.496	496.818	487.782	554.603	596.292	502.231	512.399	528.71
RNF10	0.0323992	0.00241479	24	13	20.4014	0.529975	0.306247	24	14	21.2141	N	Y		766.989	784.477	778.654	751.614	814.21	813.381	832.771	875.419	823.632	886.977	872.749	786.514	816.641	831.133	906.287	899.916	804.05	845.707	814.753	840.826	830.131	829.182	778.867	802.281	840.339	787.012	805.155	758.191	811.877	803.297	813.828	787.085	824.933	766.108	782.856	813.754
DHFRL1	0.0323992	0.00241479	24	8	19.0821	0.427453	0.232515	24	10.5	5.25309	N	Y		212.933	232.345	223.638	246.431	231.505	239.174	215.777	210.303	220.93	214.614	220.716	250.235	214.541	225.098	191.445	213.071	197.164	210.108	192.096	188.163	183.84	189.982	192.211	198.112	190.688	192.719	179.908	167.051	193.699	187.113	208.419	192.218	171.749	194.147	199.613	210.462
SDCCAG3	0.0323992	0.00241479	24	5	18.3482	0.383165	0.201719	24	5	34.4963	N	Y		425.006	402.732	431.822	384.811	437.957	423.3	394.381	400.336	395.777	387.147	392.231	381.96	409.309	372.044	382.89	381.061	373.965	365.272	343.429	362.403	354.955	402.425	379.191	357.88	423.994	453.673	464.836	428.876	467.669	452.114	443.305	438.601	489.485	457.112	347.094	394.362
PRICKLE1	0.0323992	0.00241479	24	16	18.3409	0.267118	0.129367	24	20	8.09656	N	N		82.162	63.4577	75.9767	67.7685	82.5809	61.2171	96.9928	80.2362	98.9443	93.0461	108.519	91.2271	122.595	95.9359	112.065	94.84	113.729	100.219	136.556	99.566	129.872	97.3307	128.14	98.8103	69.9372	50.2544	43.8692	46.4296	55.8411	53.4609	52.9319	42.6618	79.9707	41.4728	45.002	46.4856
ABCD4	0.0323992	0.00241479	24	17	17.9022	1	1	24	14.5	2.15544	N	Y		185.402	170.886	185.005	159.232	176.76	147.586	203.386	177.787	178.009	193.573	193.587	188.422	192.79	188.596	204.604	203.715	190.211	211.866	215.535	212.211	221.134	177.816	207.465	194.179	185.771	192.719	201.621	191.941	194.571	202.783	200.333	197.011	165.309	198.705	204.959	210.973
MAPK3	0.0323992	0.00241479	24	16	17.701	0.887308	0.580561	24	14	6.1027	N	Y		210.782	196.869	219.774	201.41	218.051	195.99	226.032	232.263	253.46	239.863	251.065	223.379	258.537	225.566	259.788	238.163	265.203	244.394	247.636	253.556	259.745	250.814	257.588	233.999	231.667	248.967	279.611	245.55	268.735	276.522	258.411	270.83	264.064	254.762	259.318	267.165
ATP6V1H	0.0323992	0.00241479	24	3.5	15.5861	0.476387	0.267231	24	5	23.6617	N	N		387.581	346.269	356.704	347.373	355.376	323.17	370.025	336.57	362.344	302.049	316.82	333.363	320.329	326.65	314.123	323.221	318.839	292.745	314.385	318.949	329.069	340.189	328.632	341.166	374.82	375.756	370.451	403.028	362.967	384.366	383.021	354.236	341.888	410.171	372.492	407.132
TMEM219	0.0323992	0.00241479	24	15.5	15.4226	1	1	24	15.5	3.24978	N	Y		322.195	295.303	316.784	302.352	337.747	330.288	323.879	342.06	342.916	357.222	348.548	332.936	370.751	353.325	366.335	341.934	367.509	359.557	356.168	394.889	347.935	370.605	363.936	352.964	392.304	358.236	413.877	352.769	397.868	397.27	414.633	384.435	390.193	375.534	424.177	427.566
SPIRE1	0.0323992	0.00241479	24	16	14.7632	0.0353345	0.00895623	24	21	28.2925	Y	Y		209.061	221.852	202.604	211.362	193.926	223.988	205.522	220.438	227.707	215.549	214.279	232.757	231.349	245.222	229.225	254.749	241.364	241.317	223.178	251.868	241.317	230.224	246.692	246.78	467.705	444.452	416.093	424.089	406.593	418.931	376.772	396.898	368.187	397.41	432.197	423.479
LSM10	0.0323992	0.00241479	24	6.5	14.5587	0.800656	0.513638	24	20.5	14.4606	N	Y		159.592	144.404	162.255	129.376	146.14	143.789	140.148	165.54	135.088	146.349	137.948	141.53	133.47	134.778	124.376	139.921	101.81	135.383	108.532	113.488	123.291	118.856	105.04	100.285	214.729	179.809	186.555	206.301	191.954	211.078	179.38	182.151	156.721	159.967	155.502	210.462
CXorf56	0.0323992	0.00241479	24	4	13.8938	1	1	24	8.5	4.50083	N	N		239.603	225.35	244.241	215.627	209.236	234.903	214.495	211.57	209.184	240.798	197.725	216.984	199.217	225.098	190.596	194.358	203.62	167.032	180.886	199.554	209.288	195.129	201.799	202.537	224.564	239.285	232.197	241.721	236.888	239.652	233.415	243.508	252.793	232.886	221	200.757
FUNDC1	0.0323992	0.00241479	24	7	12.9855	0.427453	0.232515	24	7	1.71621	N	Y		181.531	177.881	191.873	191.458	185.575	192.193	189.713	196.368	191.563	175.806	183.011	197.801	178.455	187.66	171.919	173.094	165.876	183.295	174.262	164.115	187.35	159.098	155.163	172.549	218.554	216.232	210.927	230.712	215.076	190.339	219.814	210.433	209.856	244.735	211.197	231.917
GTF2H2C	0.0323992	0.00241479	24	6	10.8509	1	1	24	9.5	3.39797	N	Y		108.832	92.938	108.17	105.207	100.211	102.029	102.12	101.351	90.8119	98.6569	97.9428	109.984	91.9462	84.7044	88.294	85.4835	84.9244	84.8344	78.9785	86.4874	75.0277	93.5872	79.325	87.5036	106.545	116.646	103.248	108.655	101.648	100.47	100.718	108.811	104.123	101.175	108.718	109.829
ZBTB9	0.0323992	0.00241479	24	5	10.5222	0.652985	0.398806	24	13	5.98049	N	Y		153.57	149.9	159.68	170.132	173.513	159.449	155.103	151.182	137.799	164.116	136.108	150.482	137.425	154.433	140.082	137.794	130.118	148.131	125.856	136.692	141.28	137.105	138.601	123.39	140.967	148.919	141.799	154.127	145.274	137.8	146.665	160.581	183.02	143.56	143.917	171.639
SIRT3	0.0323992	0.00241479	24	18	9.64262	1	1	24	7.5	0.295345	N	Y		82.162	82.9447	83.7031	78.6683	80.7251	81.6229	86.3108	79.3916	92.1673	92.1109	87.3668	90.8008	85.5199	97.3399	91.6899	86.7594	91.3807	107.691	101.398	110.957	92.578	94.0551	101.118	101.76	84.1432	74.6901	90.3972	78.4996	92.4868	96.3218	82.3385	97.3071	70.8465	85.2243	81.0927	91.4388
ABCB4	0.0323992	0.00241479	24	16	7.32424	0.652985	0.398806	24	12	4.49581	N	N		34.8436	33.4777	37.7737	32.6995	32.4756	36.0659	47.4282	31.6722	47.439	43.4838	53.3398	34.9562	51.4108	48.6699	67.9184	51.8855	56.6163	50.549	71.845	45.986	62.7424	41.6463	61.4551	53.0921	28.9584	29.9682	38.9949	28.7193	27.4843	36.8696	33.0824	47.4552	30.0561	36.0039	47.2298	45.9748
ANXA2P2	0.0368731	0.00303752	24	17.5	493.188	1	0.735861	24	18.5	111.864	N	N		4434.6	4261.16	4644.88	4475.09	4733.55	4692.36	4749.23	4544.75	4997.36	4864.11	4935.31	4914.33	5334.36	5020.49	5182.18	4884.9	5675.04	5295.78	5670.15	5538.57	5630.59	5396.24	6002.98	5642.51	4910.36	4781.09	4786.62	4878.46	4901.8	4702.72	4659.85	4819.34	5214.73	4864.17	4869.12	4723.66
DNAJA1	0.0368731	0.00303752	24	6	300.189	1	1	24	13.5	2.92722	N	N		2938.9	3072.95	2835.18	2848.17	2667.18	2995.37	2687.6	3108.52	2806.13	2928.38	2695.96	3009.64	2629.86	2790.1	2476.48	2714.21	2300.41	2667.23	2407.57	2574.37	2458.36	2408.47	2446.87	2482.55	2731.38	2834.53	2699.51	2956.66	2652.02	2730.66	2800.24	2803.69	3290.07	2902.64	2790.57	3021.57
NOP56	0.0368731	0.00303752	24	5	282.189	0.236964	0.110879	24	6	146.215	N	N		3546.3	3300.3	3425.82	3143.89	3232.72	3333.25	2885	3195.93	2956.58	3039.66	3043.58	3152.45	2966.5	2889.78	2794.84	2832.01	2758.8	2820.64	2574.19	2744.81	2656.68	2803.4	2437.28	2680.66	2414.47	2553.75	2407.49	2502.89	2426.03	2399.75	2426.05	2404.4	2779.65	2346.63	2099.5	2202.19
UACA	0.0368731	0.00303752	24	18	257.027	0.0479328	0.0134079	24	7	28.018	Y	N		851.302	611.592	795.824	681.95	839.727	658.677	1037.87	604.728	1157.51	731.277	1007.48	912.271	1044.03	1054.83	1076.51	1097.25	1224.7	1041.31	1322.76	1090.58	1224.14	1095.91	1578.22	1297.81	419.623	398.808	463.507	387.711	442.366	407.87	464.992	415.113	331.691	356.393	465.169	411.73
MMP14	0.0368731	0.00303752	24	17	146.471	1	1	24	15.5	47.4383	N	N		771.721	892.905	770.069	980.037	856.893	809.11	882.763	924.828	916.251	975.815	940.803	930.602	916.496	1154.04	1054.43	1091.3	1070.74	1105.49	1089.9	1189.31	1034.15	1144.1	1138.01	1249.14	946.338	950.685	985.95	986.031	957.152	963.218	920.427	982.658	932.813	1096.52	1097.87	1123.83
KLHL5	0.0368731	0.00303752	24	17.5	135.67	0.383165	0.201719	24	18.5	24.3638	N	N		858.614	780.48	834.885	794.266	913.493	822.398	951.128	829.811	951.943	911.758	1026.79	922.502	1026.24	940.64	1043.4	1013.47	1116.43	1040.87	1130.67	1083.83	1195.18	1073.44	1263.53	1175.4	978.575	1011.08	1015.64	1048.26	1007.76	998.705	1004.97	1058.87	1019.22	992.613	1057.77	1075.81
PPP1CC	0.0368731	0.00303752	24	8	113.293	0.162817	0.0684872	24	3	44.7626	N	Y		2636.07	2606.26	2577.63	2672.35	2558.62	2747.18	2478.66	2726.34	2690.47	2716.1	2648.59	2716.78	2594.27	2684.33	2512.13	2647.01	2472.74	2581.52	2499.29	2584.92	2431.16	2482.4	2365.8	2515.98	2118.88	2185.84	2134.97	2200.86	2097.1	2131.98	2116.91	2200.68	2027.71	2095.06	2071.87	2064.27
POLR1E	0.0368731	0.00303752	24	6	106.453	1	1	24	8.5	18.5422	N	N		1765.41	1929.71	1788.67	1774.78	1744.87	1843.63	1645.03	1810.38	1715.94	1762.73	1676.98	1736.3	1722.26	1632.78	1653.39	1662.89	1656.77	1596.91	1554.09	1594.32	1554.52	1618.12	1514.58	1565.23	1775.2	1937.79	1809.27	1755.23	1811.35	1794.17	1754.1	1786.52	2060.45	1819.79	1756.41	1740.91
SH3BGRL	0.0368731	0.00303752	24	18.5	79.7684	0.529975	0.306247	24	17.5	64.5496	N	Y		513.19	553.631	499.214	626.503	508.476	586.071	568.284	565.032	602.25	653.66	591.336	616.423	667.352	668.276	646.923	671.11	670.456	659.775	704.692	719.744	733.604	729.512	798.48	791.957	640.909	675.899	659.811	656.716	642.609	670.566	685.542	672.522	643.523	692.277	798.451	758.074
MYH10	0.0368731	0.00303752	24	17	65.9912	0.800656	0.513638	24	13	11.5664	N	N		1028.53	948.368	934.041	982.88	943.649	982.796	982.747	974.659	1040.04	910.823	1064.04	1040.59	1047	1044.53	1056.13	1023.68	1076.21	1092.3	1146.97	1048.4	1127.61	979.858	1148.47	1027.43	723.96	721.082	733.369	747.182	809.26	716.192	798.39	765.515	692.364	756.537	748.993	769.312
CUL4A	0.0368731	0.00303752	24	5	60.6275	0.724874	0.45321	24	5	35.5569	N	N		1900.48	1928.71	1874.95	1917.9	1903.54	1976.03	1889.86	1883.02	1900.27	1919.37	1909.66	1905.54	1823.6	1885.49	1758.24	1755.6	1778.94	1780.64	1851.66	1793.45	1767.76	1787.05	1833.63	1761.87	1904.7	1923.96	1935.56	1929.94	1874.6	1809.84	1862.91	1946.62	1934.33	1884.96	1900.78	1895.69
NUDT21	0.0368731	0.00303752	24	4	60.5326	0.00300759	0.000185139	24	9	43.977	Y	N		2152.13	2155.56	2137.22	2152.01	2154.53	2265.98	1988.57	2092.9	2091.84	2079.28	2093.59	2078.19	2075.22	2011.85	2042.65	2067.34	2127.08	1983.28	2001.47	2024.23	2042.86	2021.95	2122.16	2102.05	1790.5	1702.2	1784.46	1803.1	1763.36	1809.84	1835.34	1811.93	1914.47	1848.96	1819.68	1710.77
TOMM70A	0.0368731	0.00303752	24	5	54.6931	1	0.825244	24	3	22.9419	N	Y		1245.77	1156.23	1209.19	1098.04	1244.28	1153.63	1089.99	1132.17	1087.48	1111.88	1132.55	1151.85	1085.06	1079.16	1079.05	1081.09	1087.63	1027.68	1052.2	1037.43	1058.72	1036.48	1154.13	1048.08	1241.93	1305.69	1159.21	1214.83	1192.73	1193.19	1214.86	1205.07	1279.53	1252.39	1150.45	1200.45
WIPI1	0.0368731	0.00303752	24	18	53.9757	1	1	24	11.5	11.5169	N	N		305.419	283.811	285.02	325.099	306.663	312.255	330.716	287.161	329.814	283.814	295.208	311.622	348.506	338.35	401.143	340.233	383.898	352.524	409.669	386.873	382.597	371.541	414.495	391.8	708.114	798.077	751.094	763.456	736.841	809.288	643.27	774.143	620.444	795.731	770.38	828.568
ZNF395	0.0368731	0.00303752	24	17.5	52.5713	1	1	24	13.5	4.38781	N	N		267.134	236.842	261.411	243.114	290.889	211.65	287.56	249.999	292.315	271.657	338.432	271.55	334.17	264.409	351.053	304.083	400.784	325.712	363.301	359.872	355.833	365.926	369.602	335.758	181.4	169.205	205.166	152.213	201.115	169.6	198.862	180.713	152.964	159.967	176.889	167.042
RPTOR	0.0368731	0.00303752	24	6	52.3815	1	1	24	10.5	13.0435	N	N		543.302	447.202	486.337	438.363	435.637	422.351	430.272	423.14	393.97	430.163	398.669	385.797	359.381	385.616	376.098	376.383	359.066	385.052	311.328	351.856	354.078	342.997	313.377	305.28	498.849	440.303	423.183	463.339	445.856	491.288	428.601	453.461	385.899	442.984	361.798	385.167
SNRPD1	0.0368731	0.00303752	24	3	51.0419	1	1	24	9.5	9.09006	N	Y		815.167	807.462	806.555	758.249	798.9	798.196	782.352	744.507	786.584	800.477	784.002	777.136	741.502	677.167	721.209	691.098	697.771	694.06	758.194	712.994	798.101	666.809	766.663	726.575	610.312	610.43	606.193	641.877	596.366	586.688	572.694	589.595	622.591	551.907	554.282	566.001
ATP6V1C1	0.0368731	0.00303752	24	3	49.6453	0.0964854	0.0343842	24	2	20.3345	N	Y		776.452	866.422	803.121	803.744	737.661	794.399	719.114	795.183	685.381	736.888	747.216	777.562	681.193	767.487	652.866	739.582	656.55	693.181	680.744	706.243	690.167	707.519	723.514	765.903	936.503	1000.02	941.637	1025.76	880.806	922.201	898.005	897.814	927.982	913.313	868.85	893.444
PYGL	0.0368731	0.00303752	24	17.5	48.8737	1	1	24	6.5	8.04614	N	Y		884.855	915.889	834.885	909.899	858.748	877.92	937.028	877.953	977.696	934.201	927.468	873.478	939.73	899.926	978.026	942.871	998.234	950.761	972.71	1086.37	973.166	996.703	1006.38	968.439	1194.94	1271.11	1302.34	1142.55	1237.67	1217.62	1272.94	1248.22	1304.22	1217.75	1296.59	1240.3
SMYD2	0.0368731	0.00303752	24	19	48.6786	1	0.923131	24	4.33333	7.76716	N	Y		1158.44	1163.22	1245.24	1178.13	1169.12	1206.78	1134.43	1198.9	1155.25	1213.81	1203.82	1226.45	1207.66	1127.36	1258.19	1182.74	1287.28	1239.55	1295.25	1254.28	1280.3	1273.25	1246.97	1265.36	978.028	1031.83	1008.55	1026.24	1003.83	1052.63	1006.44	1050.73	1026.2	1040.01	1037.27	1007.36
ASPHD2	0.0368731	0.00303752	24	18	45.071	0.0738391	0.0238555	24	15	12.6194	N	N		267.134	275.816	267.421	286.239	326.612	306.086	336.698	300.675	336.591	311.4	320.498	337.199	370.751	355.197	375.249	358.095	362.543	349.887	386.74	380.123	375.577	399.617	363.936	376.561	243.688	237.441	258.784	263.261	274.407	271.913	274.217	249.26	251.72	262.965	247.288	275.338
DOCK1	0.0368731	0.00303752	24	18.5	43.4073	1	1	24	15.5	5.7725	N	N		640.519	679.547	664.045	684.794	617.037	681.93	653.74	664.271	680.863	699.482	676.863	702.96	658.454	722.093	690.221	731.926	741.971	702.412	786.218	753.073	776.163	735.595	838.143	813.096	749.64	727.537	706.782	745.746	785.702	714.349	745.458	755.928	665.528	760.183	781.965	725.891
S1PR5	0.0368731	0.00303752	24	17	41.3226	0.162817	0.0684872	24	15	4.32586	N	N		54.6313	53.964	62.67	53.0774	65.8791	55.048	98.7019	62.9221	98.4925	66.8623	97.9428	79.7172	99.3612	94.064	111.641	98.2423	138.064	99.3398	148.276	125.301	130.75	102.946	151.676	123.39	42.618	45.1829	41.2105	42.6004	41.0083	47.0087	51.4616	46.9759	49.9146	52.4107	50.3487	53.1264
TRIM22	0.0368731	0.00303752	24	16	41.2797	0.184819	0.0806795	24	16.5	31.4568	N	Y		333.38	364.257	325.798	372.964	295.064	383.912	317.47	393.157	346.079	398.368	338.432	425.442	411.286	423.522	394.776	458.464	422.636	460.216	381.645	441.297	389.617	454.834	386.164	441.451	403.778	412.179	424.512	505.461	416.191	465.018	495.869	517.214	481.434	550.996	552.054	530.243
POLR1B	0.0368731	0.00303752	24	7	41.2393	0.724874	0.45321	24	17	11.5179	N	N		828.933	828.947	776.078	847.343	790.55	838.532	741.333	841.635	787.94	842.09	819.409	852.59	757.321	778.251	760.687	761.697	739.985	725.269	734.245	764.042	739.308	735.595	735.717	741.815	919.565	952.068	919.481	844.828	882.551	824.957	900.21	889.186	1106.71	871.385	875.979	946.059
CDK12	0.0368731	0.00303752	24	5	32.4755	1	1	24	15.5	7.02635	N	Y		599.654	586.609	577.337	607.547	560.437	578.953	579.393	605.572	575.594	548.925	572.023	595.108	531.41	541.921	550.988	516.304	521.466	542.853	557.435	511.33	527.826	532.979	540.892	532.396	619.6	601.67	527.76	562.899	555.794	530.001	533.73	578.091	565.699	541.425	508.834	539.438
SLC17A5	0.0368731	0.00303752	24	17.5	30.0008	1	1	24	7.5	5.04511	N	N		147.978	174.384	172.986	175.345	193.462	176.533	190.14	152.871	215.509	196.379	183.011	191.833	209.598	197.488	226.253	201.588	234.411	214.943	228.783	218.961	230.348	227.417	249.307	207.944	162.823	159.984	155.979	129.716	157.053	171.905	148.136	156.267	132.032	151.763	163.968	145.587
TWF1	0.0368731	0.00303752	24	4.5	29.9141	0.0642263	0.0197614	24	3	84.1408	N	Y		1427.73	1637.91	1538.42	1555.83	1459.08	1523.78	1436.95	1401.6	1435.37	1423.28	1421.32	1553.85	1418.25	1439.04	1396.15	1389	1403.49	1353.83	1380.85	1397.3	1411.05	1357.01	1377.29	1425.13	1691.61	1727.09	1599.68	1691.57	1539.99	1633.78	1645.3	1707.91	1745.4	1556.83	1588.44	1542.71
KIAA0319L	0.0368731	0.00303752	24	17	28.8695	1	1	24	16.5	20.3009	N	N		472.324	497.169	460.582	482.91	477.392	475.026	465.309	491.975	496.077	467.101	529.259	469.351	515.097	505.418	526.368	495.464	509.546	530.105	497.819	528.628	519.49	521.281	522.15	480.778	643.095	646.853	670.889	694.051	645.663	673.331	727.446	681.15	650.5	696.379	701.763	741.727
URB2	0.0368731	0.00303752	24	8	28.6752	1	0.825244	24	17.5	22.8919	N	Y		570.832	712.525	571.327	669.155	536.312	613.12	554.184	610.217	614.9	619.06	576.621	644.132	573.922	567.66	534.433	557.982	546.297	560.435	500.367	550.988	479.563	530.639	512.126	541.244	627.796	569.396	533.964	652.887	592.876	558.575	595.116	581.926	772.335	594.292	604.185	622.192
FLYWCH2	0.0368731	0.00303752	24	17	26.714	0.162817	0.0684872	24	14	11.3619	N	Y		234.011	220.353	261.841	241.218	264.444	233.954	282.433	273.648	283.731	282.411	263.94	261.319	284.737	296.231	293.323	277.715	334.731	300.217	316.424	303.339	300.549	340.657	298.994	308.229	239.316	222.687	244.161	222.096	241.687	254.861	265.762	235.359	266.748	265.244	290.062	263.589
POLR3G	0.0368731	0.00303752	24	5	26.3196	0.143413	0.0579452	24	6	27.9279	N	Y		258.101	214.357	252.397	202.358	217.123	204.532	212.359	207.77	197.889	196.379	197.265	182.028	205.643	168.005	181.682	178.197	161.406	170.548	149.295	185.631	146.107	179.687	147.754	165.175	226.203	252.194	198.076	222.096	205.914	237.809	213.933	206.598	216.833	166.347	173.324	197.181
CCDC90B	0.0368731	0.00303752	24	8	26.3046	1	1	24	10.5	0	N	Y		669.341	660.56	666.191	695.22	690.339	743.148	661.859	671.028	686.737	703.223	684.68	692.303	717.774	682.315	649.895	688.547	649.597	652.742	633.866	650.554	639.71	622.823	669.468	679.382	780.784	760.732	732.483	822.331	725.498	787.627	774.497	806.259	742.815	816.695	810.927	795.875
TET1	0.0368731	0.00303752	24	15	24.8702	1	0.735861	24	20	2.15634	N	N		116.575	103.931	114.18	110.42	122.48	111.994	138.866	129.223	152.257	131.387	168.756	124.904	155.221	150.69	158.335	167.99	165.876	164.394	167.129	142.599	168.483	140.381	209.645	164.192	89.0607	74.6901	77.1035	73.2343	87.2517	88.0262	89.3226	84.3648	63.8692	74.2865	85.1027	79.1788
GTPBP4	0.0368731	0.00303752	24	5	23.0222	1	1	24	12.5	6.89384	N	N		377.257	410.227	370.44	388.129	366.511	382.488	360.625	356.84	351.952	362.833	365.101	367.466	337.136	337.882	353.6	320.67	371.979	318.679	307.252	326.543	319.855	331.299	354.783	341.657	443.664	412.179	391.278	412.601	372.129	378.374	412.06	359.509	474.457	378.268	388.086	380.569
SLC44A2	0.0368731	0.00303752	24	15.5	22.4658	0.0553194	0.0163087	24	18	34.0047	N	Y		243.045	273.318	242.954	262.544	263.98	268.122	290.124	271.958	312.646	278.671	297.047	249.383	310.442	289.68	330.678	299.405	320.826	326.151	298.08	300.385	319.416	298.543	332.119	308.229	288.491	290.922	309.3	290.065	321.523	339.661	333.03	312.533	318.273	284.841	321.697	371.374
HECTD2	0.0368731	0.00303752	24	19	21.4426	1	1	24	6.5	6.20296	N	Y		291.223	322.785	301.331	321.782	301.095	324.593	293.969	330.658	304.062	324.025	315.9	327.821	293.635	330.394	313.698	343.21	344.664	330.986	364.32	364.935	356.272	354.695	339.528	345.099	271.007	257.266	254.796	261.346	246.05	264.079	269.806	270.83	274.799	263.876	258.873	274.827
JMY	0.0368731	0.00303752	24	16	20.5453	1	1	24	10.5	1.60618	N	N		114.855	107.428	100.015	113.263	107.634	108.198	126.903	105.996	134.637	111.281	148.064	141.956	162.636	142.266	132.865	143.748	148.494	144.614	163.052	124.457	154.004	128.214	157.342	147.97	108.184	97.2815	91.7265	74.1917	86.8155	90.7914	91.8957	88.6789	65.4794	99.3524	90.4495	89.3955
TPP2	0.0368731	0.00303752	24	17	19.1494	0.267118	0.129367	24	2	14.705	N	Y		471.033	457.695	436.973	462.532	464.401	462.688	449.072	465.792	481.167	461.49	452.928	492.371	479.01	488.571	455.903	495.464	498.124	509.886	493.743	495.72	513.347	480.102	466.797	493.56	512.509	474.881	434.704	496.845	461.998	474.235	480.431	460.172	487.875	457.112	501.705	468.943
BRD1	0.0368731	0.00303752	24	16.5	18.1046	0.184819	0.0806795	24	9	9.21912	N	Y		454.257	442.205	417.657	452.106	434.709	449.4	460.609	413.428	464.903	438.579	440.973	465.514	450.833	429.606	480.947	477.177	487.695	477.798	469.795	467.032	495.358	471.679	458.952	451.774	370.995	363.307	369.565	359.471	383.908	356.253	371.994	371.972	415.418	395.131	380.957	378.526
AKAP13	0.0368731	0.00303752	24	17	17.5049	1	1	24	16.5	1.49334	N	Y		504.587	502.165	505.223	489.544	467.185	487.839	496.928	481.839	516.86	493.285	533.398	503.028	491.863	512.906	530.188	514.602	517.989	548.127	573.231	532.003	521.684	483.846	548.301	526.005	446.396	437.536	441.351	463.817	444.548	431.835	428.601	461.61	366.04	422.931	445.118	461.281
GPR161	0.0368731	0.00303752	24	15.5	17.437	0.110718	0.0410599	24	14	16.1051	N	Y		186.263	228.847	184.576	228.423	197.637	210.226	217.913	219.594	229.515	255.76	246.466	242.136	252.111	267.217	235.168	261.979	201.633	272.525	236.936	250.181	246.582	269.063	230.565	242.356	169.926	169.666	185.226	148.862	173.195	156.235	178.645	163.936	188.924	169.537	188.919	200.757
ZSWIM4	0.0368731	0.00303752	24	18	16.8915	1	0.735861	24	14.5	1.46092	N	N		24.5195	24.9833	23.6086	24.6431	32.0117	27.524	36.3189	24.9155	41.5656	29.9244	35.4066	32.3984	53.3881	42.1182	48.3919	43.3797	54.1331	48.7908	60.1256	49.3611	65.8137	53.8126	66.6853	58.4996	26.7728	29.0461	31.4618	33.5059	31.4106	34.1044	38.2286	33.0748	46.6943	36.9154	43.2197	34.7365
CHKA	0.0368731	0.00303752	24	8	14.089	0.0642263	0.0197614	24	14.5	9.27893	N	N	A	234.441	255.829	244.671	231.266	244.495	230.632	278.16	242.398	256.623	242.668	243.248	254.924	244.696	232.586	228.376	211.37	223.485	233.405	230.312	210.101	227.716	216.654	200.928	207.452	182.492	178.426	166.171	150.777	169.268	187.113	172.396	205.639	173.896	193.236	197.385	198.203
THEM6	0.0368731	0.00303752	24	17.5	13.6117	0.0353345	0.00895623	24	5	6.93804	Y	Y	A	98.5084	88.9407	103.448	95.255	106.706	99.1813	103.829	95.0165	107.528	109.411	109.898	104.442	119.629	103.424	122.678	111.001	120.185	120.439	123.308	135.427	105.741	145.996	112.014	126.831	86.3288	89.9047	117.871	77.0636	109.065	98.1653	97.777	86.2822	78.8973	76.1094	75.3003	79.6897
TMEM100	0.0368731	0.00303752	24	15.5	11.588	0.427453	0.232515	24	11.5	7.2849	N	N		79.1508	77.4484	78.5522	74.4032	79.3333	80.1992	90.5836	96.7057	84.4867	88.3704	103.921	87.8168	103.316	97.8078	106.972	101.645	112.239	98.9003	112.608	102.097	102.669	114.176	110.706	100.285	113.102	106.964	112.996	118.707	103.83	113.835	110.275	112.646	85.8746	97.5295	104.708	93.9929
TSNARE1	0.0368731	0.00303752	24	18	11.353	1	1	24	11.5	1.00816	N	Y		86.4637	75.9494	107.312	73.4554	89.076	79.7246	90.1563	79.3916	81.7759	87.4353	89.2061	85.259	96.3952	87.9803	108.245	92.2882	114.722	96.7025	97.8314	112.223	102.231	110.901	109.399	104.218	89.6071	88.5216	99.2596	96.2098	101.648	116.6	106.967	96.3485	77.8238	90.6933	112.282	103.699
ALDH5A1	0.0368731	0.00303752	24	18	8.60554	0.302769	0.150471	24	20	3.61081	N	N		110.123	80.4464	91.8588	92.4116	91.3957	83.9956	86.3108	87.4152	101.655	86.0326	95.1839	92.0797	100.35	93.128	112.49	102.495	106.28	92.7465	115.665	101.254	110.567	96.3948	105.04	111.592	92.339	91.2879	94.3853	85.6794	80.7079	83.8784	90.4253	98.7452	100.903	91.6048	92.6773	80.2005
PCDHB12	0.0368731	0.00303752	24	17.5	8.56539	1	1	24	17.5	0.813565	N	N		35.2737	41.4724	45.0709	32.6995	35.2593	39.8623	36.3189	34.206	33.4332	36.4703	44.1432	42.6295	51.9051	42.1182	50.5143	45.5062	59.5961	42.637	45.349	45.986	48.7022	50.0691	44.021	55.0585	34.4222	32.2735	34.5636	32.5486	45.8072	38.7131	39.3313	34.5129	35.96	29.1677	43.6653	38.8232
DLL3	0.0368731	0.00303752	24	7	4.04628	1	1	24	6.5	0.832871	N	Y		45.5978	37.475	54.0851	47.3906	51.961	47.9297	53.8374	55.3207	47.439	52.3676	35.4066	48.1713	44.9844	42.5862	42.449	49.3338	43.2072	45.2743	34.1391	47.2516	39.4882	37.4349	40.5342	42.277	50.8138	41.4945	54.9473	52.1735	57.1499	53.0001	46.683	51.7693	57.4286	44.663	53.4677	50.5723
CSDE1	0.0416931	0.00380362	24	17.5	480.64	0.0413187	0.0109801	24	4	385.185	Y	Y		16034.5	16291.6	16152.6	16440.3	15792	16539.1	15757.7	16567.9	16230	16279.8	16637.9	16927.3	16820.7	16613.3	16896.8	16799	17127.9	16999	17278.5	16836.8	17520.1	16529.4	17432.3	17706.7	15396	16313.3	15518.6	16000.5	15647.7	15520.7	15796.5	15879.3	15375.8	15480.7	15667.4	15239.1
TOP2B	0.0416931	0.00380362	24	17	128.706	0.0844948	0.0286919	24	21.5	39.4283	N	N		1754.22	1812.79	1757.77	1846.34	1688.27	1848.85	1873.2	1801.51	1949.97	1870.27	1971.73	2018.93	1957.56	1969.26	1967.09	2029.49	1996.47	2052.29	2105.92	2041.52	2124.91	1927.9	2283.43	2172.35	1663.74	1779.19	1603.66	1675.3	1627.68	1583.09	1667.72	1653.74	1533.4	1553.64	1637	1657.14
ZNF638	0.0416931	0.00380362	24	18	92.6706	1	1	24	8.5	20.8579	N	Y		1764.98	1797.3	1704.97	1848.23	1649.76	1770.55	1732.63	1741.97	1794.55	1842.22	1766.19	1967.78	1849.31	1880.34	1750.6	1877.66	1925.95	1913.39	2053.44	1906.1	1915.18	1849.28	2128.26	2056.34	1652.81	1627.04	1461.42	1553.72	1507.71	1399.66	1629.86	1526.72	1561.31	1499.86	1610.27	1509
OSBPL9	0.0416931	0.00380362	24	17.5	92.5417	1	1	24	11.5	9.87496	N	N		1308.57	1325.12	1279.16	1351.58	1357.48	1343.46	1372.85	1320.52	1410.97	1424.68	1416.26	1389.3	1432.58	1391.3	1449.21	1403.04	1482.45	1486.58	1591.29	1470.71	1554.08	1506.75	1622.24	1575.07	1095.5	1076.09	1208.4	1164.09	1176.59	1139.27	1183.62	1160.5	1128.18	1177.65	1211.04	1205.56
RIMS2	0.0416931	0.00380362	24	6	80.481	1	1	24	16.5	4.75238	N	N		384.14	442.705	373.015	424.619	321.045	466.01	297.388	372.887	297.736	335.246	318.659	402.422	319.834	334.606	292.474	310.463	253.283	265.492	239.993	237.946	252.725	260.64	242.769	259.07	410.335	428.776	374.439	505.939	400.922	428.148	391.843	442.915	338.131	473.063	358.679	374.95
RBM8A	0.0416931	0.00380362	24	4	59.9326	1	1	24	13.5	7.38591	N	N		1075.85	1077.78	1019.89	1049.23	1034.58	1129.43	1030.6	1101.35	1008.42	1072.6	952.299	1051.67	908.093	976.206	855.772	1029.63	873.579	984.607	956.914	960.643	913.934	993.896	877.369	982.204	972.565	1056.73	1020.07	1062.14	997.287	974.74	1021.88	987.452	1193.66	1106.55	1005.64	963.428
CANT1	0.0416931	0.00380362	24	4.5	59.8219	0.302769	0.150471	24	6	41.4021	N	N		1007.88	1081.28	1093.72	1105.62	1097.68	1038.32	1089.14	1085.72	1003.9	1069.33	986.326	1051.24	927.866	1044.53	980.997	1014.75	1015.12	974.497	916.66	952.205	947.279	1065.49	983.717	948.284	1330.45	1308.46	1376.34	1259.34	1350.66	1326.38	1263.38	1269.79	1433.03	1287.94	1206.14	1241.83
PAFAH1B2	0.0416931	0.00380362	24	4	58.5176	1	1	24	13.5	33.5771	N	Y		2346.99	2256.5	2426.96	2317.87	2322.01	2268.36	2273.14	2203.96	2227.38	2181.21	2243.03	2228.24	2221.54	2133.99	2189.52	2060.96	2281.54	2060.64	2162.48	2115.78	2220.56	2147.83	2141.34	2141.38	1852.79	1889.38	1849.6	2004.61	1907.32	1865.14	1859.97	1962.44	2028.25	2025.79	1983.21	1920.21
TLCD2	0.0416931	0.00380362	24	16	58.4697	0.383165	0.201719	24	15	8.98926	N	Y		155.721	150.4	170.411	156.863	190.678	147.111	200.822	176.097	270.628	174.403	222.096	182.881	273.367	220.887	290.776	250.497	309.403	258.459	296.552	242.587	314.59	242.859	339.528	271.36	69.9372	73.3069	77.5466	75.149	83.7617	99.5479	93.7336	79.5714	49.9146	72.4635	113.619	86.3305
EXOSC3	0.0416931	0.00380362	24	5	55.9206	0.588623	0.349965	24	6	15.0753	N	Y		654.285	673.551	651.167	640.72	616.573	684.303	596.484	659.626	560.232	619.06	571.563	647.968	586.775	612.118	550.139	577.12	542.324	570.545	530.43	575.036	550.642	598.49	542.199	553.534	561.137	592.449	579.605	611.243	585.459	584.383	568.65	582.405	615.077	587.455	537.35	581.837
TRIP10	0.0416931	0.00380362	24	6.5	54.0035	0.267118	0.129367	24	6.5	15.8642	N	N		1046.6	1106.76	1107.46	1161.07	1133.86	1093.84	1067.35	1135.98	1115.5	1157.7	1035.07	1082.36	1024.76	1103.03	1062.5	1001.99	1032.01	1066.8	958.442	1065.69	983.696	1032.27	978.487	1006.78	882.411	964.055	1017.85	980.766	964.132	947.549	948.363	971.154	901.146	944.304	938.358	918.985
NOP2	0.0416931	0.00380362	24	6	49.3397	0.800656	0.513638	24	17	12.3834	N	N		351.447	425.217	382.459	378.651	360.479	359.235	345.243	386.823	337.495	386.679	309.922	374.287	304.51	365.96	291.2	314.716	275.135	338.898	269.546	310.511	283.877	339.721	295.072	292.99	375.366	404.802	392.164	381.489	366.457	363.626	388.167	365.261	491.632	369.154	365.808	407.132
ANO2	0.0416931	0.00380362	24	6	47.6646	0.162817	0.0684872	24	14.5	4.69109	N	N		215.944	279.813	217.199	271.548	213.411	287.104	198.686	269.425	167.618	245.473	172.435	244.267	166.591	199.36	172.768	176.496	153.957	174.504	134.009	149.771	135.138	154.887	124.654	146.003	74.3083	78.3785	74.0016	90.9446	93.7956	106	104.026	118.878	83.7277	107.556	110.054	102.677
CFL2	0.0416931	0.00380362	24	8	46.4739	1	1	24	8.5	11.3854	N	Y		945.938	932.878	996.711	924.116	969.629	931.545	973.346	930.74	956.913	950.566	991.844	942.964	1003.99	906.477	961.47	892.686	903.874	867.685	888.126	856.858	924.464	845.56	875.626	859.797	743.629	749.206	743.561	777.816	763.889	771.497	760.896	788.523	682.703	733.294	739.191	755.009
ASNSD1	0.0416931	0.00380362	24	5	42.4303	0.126438	0.0488609	24	5.5	39.0713	N	Y		930.883	985.343	984.692	959.185	919.06	925.375	920.364	907.514	945.618	944.488	928.388	936.144	929.349	884.482	874.025	857.387	909.337	807.905	857.044	828.591	909.985	857.258	894.367	873.562	778.052	788.395	781.227	798.398	804.897	780.714	741.782	773.664	903.293	769.753	738.3	692.176
DCAF17	0.0416931	0.00380362	24	5	39.4961	0.267118	0.129367	24	8	12.5359	N	N		461.57	449.7	432.252	430.78	414.76	410.962	414.89	380.488	412.042	395.095	388.093	406.259	394.479	360.813	385.437	335.555	356.583	337.14	368.397	329.918	358.904	313.985	371.346	307.246	344.222	350.859	324.809	396.806	379.981	375.609	360.966	380.121	325.787	412.449	347.54	380.569
TFIP11	0.0416931	0.00380362	24	4	35.0755	1	1	24	10.5	7.80533	N	N		1142.52	1112.76	1147.81	1077.19	1106.49	1066.32	1019.92	1095.01	1083.42	1016.49	1022.19	1069.15	1014.87	1050.62	990.336	965.411	1089.12	985.926	978.824	1010.43	1013.53	1012.15	1028.17	986.137	1197.13	1114.82	1213.27	1271.79	1189.68	1242.04	1236.18	1244.38	1342.86	1305.71	1143.32	1237.23
VEGFB	0.0416931	0.00380362	24	16	33.2017	0.110718	0.0410599	24	18.5	13.9824	N	Y		360.05	348.268	373.445	358.273	385.532	398.623	392.244	417.228	395.325	443.722	420.28	387.076	383.604	436.157	422.368	453.786	443.991	466.809	442.28	463.235	434.371	482.442	439.338	418.346	416.345	425.088	481.675	436.055	452.837	471.931	453.597	394.981	402	427.945	473.635	449.531
MSRB2	0.0416931	0.00380362	24	18	30.1295	0.143413	0.0579452	24	16.3333	17.6428	N	N		136.363	141.406	139.076	145.015	153.099	148.535	163.221	142.736	172.588	153.83	173.814	158.155	162.636	155.837	187.625	178.622	183.258	191.647	208.401	195.335	210.604	202.148	235.796	192.705	168.286	169.205	171.489	169.923	171.886	184.809	177.542	177.358	162.088	191.869	217.435	186.964
NCEH1	0.0416931	0.00380362	24	5	29.1213	0.427453	0.232515	24	3	15.8561	N	N		179.38	214.857	160.968	182.928	148.924	192.193	142.285	164.695	134.185	160.376	123.233	163.697	132.976	139.926	119.282	142.473	119.192	128.79	109.551	115.176	107.496	132.426	109.399	138.629	238.77	236.057	204.28	244.593	211.585	185.27	205.479	221.937	252.793	226.961	171.988	181.856
CNPY3	0.0416931	0.00380362	24	15	28.5917	1	1	24	16.5	11.9696	N	N		752.363	686.542	751.182	691.902	698.69	730.335	745.178	781.669	758.121	761.669	812.052	733.654	714.808	774.507	799.74	793.168	778.225	847.905	809.657	831.545	777.918	757.588	757.51	728.542	610.858	609.508	703.68	648.1	660.059	671.027	652.827	613.562	622.591	620.725	620.671	700.86
GRAMD4	0.0416931	0.00380362	24	18	28.3241	0.162817	0.0684872	24	16	15.7577	N	N		151.419	159.394	157.534	173.449	167.945	130.027	175.185	159.206	170.781	173.935	183.47	163.697	196.745	165.665	192.719	187.553	200.64	204.833	219.611	207.992	208.849	209.167	230.565	213.352	175.389	194.563	208.711	172.795	208.968	179.278	226.063	204.681	170.676	199.161	221.445	210.462
DPH3	0.0416931	0.00380362	24	3	27.9133	0.724874	0.45321	24	16.5	16.8293	N	Y		425.436	464.191	444.27	390.498	398.522	437.062	411.044	425.252	408.428	414.265	409.704	419.048	384.592	369.704	349.78	366.601	375.455	392.085	381.645	374.216	372.945	349.548	414.931	377.544	368.263	389.587	377.541	416.431	376.928	368.235	430.807	400.254	468.553	385.105	387.195	402.024
IPPK	0.0416931	0.00380362	24	5	27.6641	0.267118	0.129367	24	17	12.3225	N	Y		426.296	421.719	388.898	397.607	385.996	402.42	370.88	402.026	353.76	367.041	366.941	360.646	362.842	387.02	349.78	367.026	322.315	344.173	346.486	355.653	317.661	341.593	301.609	350.506	332.748	339.794	296.893	331.708	328.503	310.626	294.801	299.591	354.769	361.406	343.53	357.582
HM13	0.0416931	0.00380362	24	7	26.1422	1	1	24	15.5	0	N	N		615.57	590.107	598.799	553.522	578.066	574.682	570.42	567.143	561.588	586.798	563.286	554.61	531.41	565.788	548.866	540.12	527.922	532.743	515.653	525.675	482.195	519.877	465.054	471.93	564.415	550.954	503.388	570.558	526.564	554.427	486.312	548.371	589.314	583.809	563.193	581.326
UTP18	0.0416931	0.00380362	24	4	24.0518	0.184819	0.0806795	24	2	26.8226	N	N	A	897.329	886.909	858.064	831.704	862.46	848.498	845.589	819.676	841.252	829.466	829.065	809.108	819.112	773.571	819.266	776.582	811.5	786.367	796.409	810.872	820.478	782.389	798.916	738.373	968.193	1006.01	944.296	983.159	944.5	952.158	931.822	958.212	977.36	914.225	871.078	925.626
PID1	0.0416931	0.00380362	24	18	23.6611	1	1	24	15.5	3.34155	N	Y		163.464	159.893	145.944	152.598	164.234	176.533	144.421	179.476	153.16	163.181	157.72	182.454	180.926	195.616	183.804	185.427	198.157	192.965	196.682	197.444	208.41	179.687	216.618	218.759	248.059	254.038	245.047	296.288	239.506	288.505	240.032	266.037	213.613	278.46	279.369	283.511
OBSL1	0.0416931	0.00380362	24	18	21.5851	1	1	24	5.5	4.1103	N	N		202.609	207.362	209.043	204.253	207.38	195.515	222.186	208.192	233.129	221.627	204.622	185.438	209.598	218.547	250.874	229.232	237.888	234.284	261.393	279.713	245.266	261.576	247.564	232.524	238.77	248.967	276.509	249.38	229.036	260.852	230.474	246.863	220.054	266.611	265.111	268.186
STON2	0.0416931	0.00380362	24	16	18.7443	0.340741	0.174483	24	6.5	14.6477	N	Y		232.29	254.33	236.086	220.366	222.69	231.107	244.832	242.398	255.267	230.511	280.494	250.661	279.299	249.433	284.408	241.991	291.028	255.822	274.132	254.821	274.663	248.474	272.843	274.801	257.894	248.506	231.31	269.005	257.829	256.244	255.838	268.434	207.709	263.876	267.784	231.917
KLF3	0.0416931	0.00380362	24	17	18.6403	0.184819	0.0806795	24	23	10.6823	N	Y		268.425	295.803	249.392	284.817	233.825	252.936	279.869	301.941	283.731	283.814	319.119	303.948	302.038	296.699	297.568	336.405	291.028	343.733	305.723	316.839	311.08	310.709	316.864	311.179	381.376	386.36	323.48	356.12	319.778	330.444	329.722	331.707	308.612	298.057	285.607	320.802
CROCC	0.0416931	0.00380362	24	18	16.3872	0.652985	0.398806	24	11	5.80735	N	Y		100.229	97.9347	112.033	106.155	113.665	97.2831	132.03	100.084	131.926	108.008	132.89	106.147	115.674	126.823	132.016	131.84	134.588	134.504	143.18	142.599	148.739	151.611	139.908	130.764	78.6794	71.9238	95.7146	75.149	69.8014	81.1131	106.231	83.4061	71.92	77.0209	84.6572	82.2438
ADAMTSL1	0.0416931	0.00380362	24	5.5	15.5481	1	1	24	13.5	3.96902	N	Y		80.0112	74.95	73.4012	78.1944	62.6316	77.3519	64.9467	76.8578	63.2521	61.2514	54.7192	72.4701	70.6898	60.8374	64.098	56.989	48.1735	53.1864	40.2536	48.9392	60.1099	48.1974	49.6871	40.3107	142.606	161.367	131.608	180.453	112.118	139.644	134.168	142.845	115.394	186.855	136.788	148.652
SMAGP	0.0416931	0.00380362	24	6	13.3211	0.340741	0.174483	24	20.5	19.7482	N	Y		79.1508	77.948	71.6842	68.2424	57.9922	78.7755	52.9829	66.3004	55.5714	75.2785	63.4559	53.2869	53.8825	57.0936	46.2694	50.6097	51.1533	46.1535	41.2726	43.8765	42.5596	44.4539	45.7644	39.8191	155.173	190.414	140.027	143.597	124.77	170.983	129.757	127.506	151.891	124.874	118.074	140.479
CLP1	0.0416931	0.00380362	24	4	12.6327	1	1	24	5.5	0	N	N		274.447	274.317	282.015	281.5	258.877	289.002	247.823	275.759	243.069	259.5	256.123	267.287	237.775	248.497	255.543	231.784	232.425	237.8	241.012	250.181	248.776	248.474	231.001	237.44	332.202	325.501	309.3	346.068	322.395	318.461	350.674	317.327	436.35	356.848	322.143	321.824
SLC4A1AP	0.0416931	0.00380362	24	2.5	12.4416	0.0964854	0.0343842	24	4	6.0051	N	N		393.603	373.251	376.02	381.968	362.335	360.185	340.543	357.262	351.952	348.338	351.766	352.972	338.619	337.414	327.706	369.153	320.329	321.316	356.677	321.058	369.434	339.253	358.706	337.233	389.572	370.223	351.397	347.504	346.389	349.34	350.306	342.253	368.724	364.596	347.094	344.811
SERTAD4	0.0416931	0.00380362	24	16	11.7105	1	0.735861	24	17.5	9.77629	N	Y		176.799	200.366	173.845	193.827	150.78	192.668	191.849	211.148	184.786	183.287	196.805	201.211	214.047	207.315	239.837	209.669	221.002	209.229	198.211	200.819	216.308	204.956	199.62	225.15	97.8028	125.867	90.8403	127.801	95.1044	107.383	99.6149	108.332	70.3098	105.733	95.3507	91.9496
SLC7A10	0.0416931	0.00380362	24	18	9.39362	0.126438	0.0488609	24	14	1.6201	N	N		12.0447	17.4883	14.1651	23.6953	19.9493	23.253	21.3641	27.0269	22.1382	28.9892	24.8306	22.5936	22.2451	29.0148	34.8082	36.5751	33.2745	36.9228	34.6486	47.2516	39.4882	40.7104	33.5606	39.8191	8.19577	7.3768	8.41934	9.09446	11.779	10.1391	14.3357	11.0249	10.1976	6.83618	16.9314	16.3466
LGALS8	0.0416931	0.00380362	24	22	8.83583	0.0964854	0.0343842	24	3	15.1397	N	Y		444.363	416.223	410.789	411.35	413.368	408.589	402.072	386.401	398.94	382.938	403.727	378.976	417.218	427.266	401.568	384.889	415.683	404.392	437.184	402.905	445.778	415.995	470.72	415.397	445.303	426.471	445.339	448.501	399.177	408.331	424.558	405.526	413.271	394.675	389.423	413.773
PCDHB2	0.0416931	0.00380362	24	16	8.74627	0.267118	0.129367	24	14	5.9506	N	Y		132.492	128.914	114.609	118.002	157.275	125.282	141.003	141.047	149.546	150.089	148.983	133.004	157.198	150.222	152.816	154.806	163.889	170.108	159.486	142.599	146.107	157.226	151.24	158.293	98.8956	110.652	113.44	137.853	120.844	120.748	110.642	142.366	123.981	133.533	126.54	138.946
GID4	0.0416931	0.00380362	24	16	8.00699	0.209577	0.0947331	24	5	8.64104	N	Y		81.7318	76.449	90.1418	88.6203	80.2612	80.1992	90.5836	81.9254	85.3903	79.9542	93.3446	83.5538	107.271	95	95.0858	87.1847	93.8638	104.615	101.398	91.1282	100.914	87.0361	91.9647	83.0793	114.194	127.25	109.451	108.176	116.481	123.974	111.01	106.415	82.1176	103.454	112.728	119.535
CDKL1	0.0416931	0.00380362	24	5	6.4046	1	1	24	6.5	0.400258	N	N		49.8994	53.4644	51.0804	39.8081	48.2495	51.7261	47.4282	42.6519	34.7886	44.419	48.2817	43.4821	36.5808	45.862	39.4776	40.828	28.8048	40.8788	33.6296	32.9074	35.9782	38.3707	43.1493	41.7854	41.5252	54.4039	44.3123	47.3869	40.1358	46.5479	40.8017	36.4303	48.8412	39.6498	49.012	39.334
PRRG1	0.0416931	0.00380362	24	18	6.26614	0.110718	0.0410599	24	21	8.58561	N	Y		92.0559	117.921	90.5711	117.529	99.2826	95.3848	91.0109	103.04	106.173	118.762	114.037	122.347	117.652	112.315	115.461	111.426	126.145	120.439	129.423	124.457	119.781	117.452	131.627	122.898	147.524	166.9	130.721	146.947	130.005	153.47	144.092	151.473	165.845	133.078	143.472	134.859
ANKRD49	0.0416931	0.00380362	24	2	5.95154	1	1	24	7.5	1.74098	N	Y		214.223	211.359	227.501	204.727	218.051	213.074	193.986	192.145	197.889	211.341	207.841	199.932	194.273	190	194.417	192.657	194.681	194.724	204.835	195.757	214.114	196.065	197.005	201.062	169.379	144.77	163.513	162.743	151.818	154.852	154.017	168.73	152.964	150.396	156.393	152.739
LYN	0.0416931	0.00380362	24	6	4.67306	0.162817	0.0684872	24	1	7.6011	N	Y		121.307	135.41	110.746	117.055	110.881	128.603	104.257	127.111	111.143	115.957	105.3	112.542	110.731	109.975	108.245	109.3	104.293	105.933	103.436	103.785	86.4354	107.625	89.3496	108.642	116.38	124.483	108.565	113.441	85.0704	114.296	98.8797	107.853	88.5582	83.8571	90.4495	96.5471
SCUBE3	0.0416931	0.00380362	24	18	4.66703	1	1	24	14.5	0.592086	N	N		24.0894	11.992	19.7454	18.4823	19.9493	23.253	15.8094	15.2026	23.0418	21.0406	27.5895	20.8885	19.279	22.931	30.9878	29.3451	27.8115	21.5383	35.6677	29.5323	35.9782	25.2685	30.5096	24.0881	34.9686	32.2735	34.1205	18.6676	25.303	36.4087	22.4225	23.0086	30.0561	29.1677	28.5161	26.5632
DOPEY2	0.0416931	0.00380362	24	15	3.54844	0.0553194	0.0163087	24	15	3.95849	N	Y		44.3073	43.471	31.7643	47.3906	40.3626	43.6587	53.8374	45.1856	48.7944	50.0298	49.6612	44.3347	65.2522	51.4778	57.7307	52.7361	49.6634	50.549	63.1828	51.4705	54.406	52.4088	57.5324	49.1594	47.5355	43.7997	45.6417	46.9083	44.4984	47.9305	49.9912	39.7857	40.7904	49.2205	51.2399	54.6589
RPL13	0.0465394	0.00474194	24	18	859.955	0.977574	0.654469	24	15	184.099	N	N		7689.67	7087.77	8281.03	7367.81	8420.47	7815.86	8737.05	7731.81	8636.16	8457.84	8309.97	7822.09	8335.96	8165.78	9038.25	8650	9714.66	8738.83	9715.89	9640.18	9597.84	9393.34	9425.73	8904.23	8537.81	8788.53	9874.56	8782.86	9449.36	9917.46	9780.64	9259.04	9944.28	9448.51	10409.7	9626.61
HDLBP	0.0465394	0.00474194	24	17	531.302	0.236964	0.110879	24	13	106.688	N	Y		8396.01	8158.06	8451.44	8235.06	8642.23	8267.64	8399.92	8532.06	8882.4	8467.19	9033.73	8492.65	8865.4	8910.81	9187.24	8893.69	9438.53	8988.5	9106.48	8999.75	9391.18	9064.39	9380.4	9287.18	8111.08	8284.14	8367.5	8462.64	8538.45	8341.29	8504.76	8540.02	8402.83	8831.88	8737.51	8585.54
ITGB1	0.0465394	0.00474194	24	18	383.015	0.0305087	0.00727581	24	3	440.16	Y	Y		11368.9	11400.9	10918.8	11223.5	11051	11358.4	11284.9	10666.3	11659.2	10669.9	11559.1	11665.6	12017.8	11409.8	11765.2	11477.3	12359.2	11021.4	13457.4	12203.2	12738.5	11527.6	14171.3	12642.8	13472.8	13337.7	12688	13596.2	12815.1	12311.2	12562.5	12707.5	13644.9	12662.4	12711.5	12182.3
PSMB4	0.0465394	0.00474194	24	4.5	109.155	1	1	24	6.5	14.4121	N	N		2675.64	2592.27	2703.4	2575.68	2667.64	2596.75	2410.29	2461.14	2457.79	2392.08	2413.16	2365.94	2331.28	2280.93	2366.96	2310.18	2397.75	2316.02	2273.05	2275.25	2222.31	2473.98	2225.02	2342.44	2580.57	2550.07	2762.87	2717.33	2651.14	2759.23	2685.93	2695.36	2880.02	2853.42	2689.42	2670.63
SDC2	0.0465394	0.00474194	24	18	100.972	0.724874	0.45321	24	19	0	N	N		545.452	570.62	563.172	624.608	596.624	613.12	618.276	559.12	617.159	634.023	643.756	586.156	724.694	672.487	767.903	625.603	866.13	691.423	811.186	713.415	821.794	784.728	893.496	832.759	222.379	193.18	243.718	251.294	260.446	234.583	240.399	257.409	202.342	255.217	266.893	229.874
TCEB3	0.0465394	0.00474194	24	6	95.4821	0.0844948	0.0286919	24	1	59.2842	N	Y		1333.52	1352.6	1234.94	1280.02	1192.32	1253.76	1148.96	1298.56	1130.4	1271.32	1132.09	1213.66	1120.16	1165.27	1078.63	1179.33	1024.06	1125.7	1008.89	1086.79	1046	1080.46	1015.97	1119.36	1347.38	1495.18	1272.65	1420.17	1307.9	1334.22	1232.14	1260.68	1460.4	1281.56	1132.62	1252.56
SLC39A1	0.0465394	0.00474194	24	5	86.039	1	1	24	10.5	8.64154	N	Y		1740.89	1691.37	1693.38	1671.47	1630.74	1701.27	1544.19	1719.17	1543.8	1561.21	1591.46	1566.21	1557.15	1558.84	1509.06	1533.6	1474.51	1542.84	1322.76	1511.21	1373.75	1586.3	1354.19	1476.26	1729.85	1698.51	1807.5	1773.9	1844.94	1831.5	1805.93	1774.54	1736.28	1908.2	1731.46	1823.67
NIPAL3	0.0465394	0.00474194	24	5	83.1124	0.0642263	0.0197614	24	7	78.992	N	N		603.955	621.086	581.2	566.317	557.653	554.276	504.619	536.738	470.324	474.582	430.856	491.092	423.15	491.847	403.266	455.062	390.354	453.623	396.931	411.342	381.281	407.572	334.298	404.581	1008.63	1032.29	1040.45	1189.94	1050.51	1101.48	988.43	1044.97	861.966	1170.81	947.269	1140.18
MRPL3	0.0465394	0.00474194	24	5	81.6872	0.143413	0.0579452	24	1	23.9005	N	Y		1380.84	1290.14	1320.79	1241.16	1244.74	1242.38	1169.9	1238.59	1138.54	1224.56	1218.54	1243.08	1229.41	1193.35	1165.23	1149.99	1067.76	1136.69	1063.92	1123.07	1130.24	1162.35	1064.79	1093.8	1246.3	1360.1	1308.54	1286.63	1266.46	1248.5	1222.58	1232.4	1342.86	1233.7	1201.24	1181.55
SF3A3	0.0465394	0.00474194	24	6	68.8827	0.588623	0.349965	24	5.5	46.7538	N	N		1496.98	1320.12	1425.1	1322.2	1357.02	1329.69	1341.24	1318.41	1337.33	1232.51	1367.98	1328.76	1346.57	1270.57	1219.99	1211.65	1223.71	1218.89	1197.42	1202.39	1319.78	1170.31	1269.2	1205.39	1418.96	1427.87	1383.87	1444.58	1418.71	1388.14	1365.57	1410.23	1446.45	1373.16	1330.45	1338.89
CSTF2	0.0465394	0.00474194	24	4.5	63.6719	1	0.735861	24	3	23.3305	N	N		629.335	623.085	605.238	590.96	601.727	614.544	532.82	597.126	553.004	584.46	569.724	571.235	528.444	525.542	480.098	521.407	491.171	551.644	469.795	504.158	483.95	530.171	460.695	467.997	526.168	568.935	567.641	553.326	540.088	558.114	505.794	523.925	586.631	560.111	458.931	535.862
TMCO3	0.0465394	0.00474194	24	7.5	63.0827	0.0143845	0.00241479	24	13.5	64.3202	Y	N		1601.51	1756.33	1686.08	1821.22	1775.95	1805.67	1721.09	1858.52	1807.2	1821.18	1795.16	1769.98	1778.62	1792.36	1732.77	1662.46	1715.37	1726.58	1677.91	1698.95	1656.31	1748.68	1693.28	1725.98	1133.75	1130.49	1237.64	1258.86	1348.91	1272	1380.64	1357.51	1286.51	1421.47	1405.31	1341.44
C1RL	0.0465394	0.00474194	24	17	59.0731	0.0964854	0.0343842	24	15.5	21.6716	N	Y		129.05	109.427	147.232	126.059	161.45	121.011	192.277	142.314	201.051	144.011	180.711	141.104	199.217	194.68	226.678	193.508	245.834	206.152	245.598	230.774	254.919	211.507	261.947	227.116	157.359	139.698	176.806	123.015	176.685	172.365	177.91	185.507	159.941	175.006	214.762	186.453
DRG1	0.0465394	0.00474194	24	3.5	52.5736	0.143413	0.0579452	24	3	48.0136	N	Y		1331.37	1329.11	1413.94	1249.69	1387.64	1306.91	1247.66	1275.33	1289.89	1241.39	1231.87	1259.7	1278.84	1193.82	1189.42	1125.75	1231.65	1217.13	1200.98	1188.04	1198.69	1235.82	1167.21	1174.42	1338.1	1402.51	1333.8	1374.7	1358.07	1312.1	1296.83	1368.53	1423.37	1339.89	1264.07	1247.45
ANXA11	0.0465394	0.00474194	24	16	51.2431	1	1	24	17.5	2.325	N	Y		1142.09	1093.77	1171.84	1152.06	1079.58	1136.08	1173.74	1206.92	1245.16	1227.37	1224.52	1156.11	1155.75	1211.13	1284.51	1271.2	1217.25	1310.32	1218.31	1277.9	1311.89	1342.51	1204.69	1186.71	995.513	1055.8	1141.93	1039.64	1139.07	1177.52	1066.72	1025.8	965.552	986.232	1069.35	1082.45
ZNF532	0.0465394	0.00474194	24	16	50.1921	0.126438	0.0488609	24	17	44.5147	N	Y		932.173	842.938	923.739	896.629	927.875	854.193	973.346	968.746	978.148	946.358	1040.13	909.287	1017.34	985.098	1047.22	981.147	1058.82	1012.74	1077.67	956.002	1114.01	999.511	1068.27	998.426	686.259	677.743	675.763	727.557	721.136	701.905	715.684	693.613	676.799	731.927	703.1	677.362
PTRHD1	0.0465394	0.00474194	24	17.5	45.5692	0.0553194	0.0163087	24	13.5	10.1438	N	Y		297.676	253.331	322.794	294.769	317.797	301.34	325.161	309.965	358.278	323.09	347.628	346.152	325.272	348.177	343.837	347.038	392.837	356.481	385.211	404.17	406.729	402.425	382.242	403.598	267.728	277.552	303.096	287.672	291.857	308.322	315.386	306.781	320.42	322.668	335.955	308.031
PDE5A	0.0465394	0.00474194	24	17	43.8901	1	1	24	5.5	0.40744	N	N		171.637	203.864	186.293	191.932	213.411	175.109	226.032	199.746	239.454	220.692	215.658	199.08	248.156	229.31	269.127	256.025	277.122	228.13	279.227	261.15	261.939	266.255	275.458	295.448	117.473	115.262	126.733	103.39	121.716	109.226	122.405	108.332	97.6823	113.025	140.353	124.132
TEX10	0.0465394	0.00474194	24	7	41.3756	0.427453	0.232515	24	1	10.6649	N	N		567.821	610.593	630.564	565.843	612.398	624.035	564.438	591.636	595.021	597.085	625.363	576.351	565.024	553.62	531.037	542.672	566.659	513.402	552.85	510.487	551.958	494.608	512.126	509.291	626.703	640.398	602.205	628.475	582.405	592.218	589.97	596.306	695.584	606.141	552.945	588.988
BIRC2	0.0465394	0.00474194	24	6	35.0199	1	1	24	12.5	23.7157	N	Y		683.536	748.501	712.12	708.963	665.286	726.538	669.55	690.031	682.219	704.158	632.26	758.805	657.959	673.891	646.499	671.535	617.813	662.412	616.032	627.35	642.781	642.008	645.06	672.5	1149.59	1191.35	995.698	1087.98	948.863	1007.46	964.905	974.51	1422.83	968.458	998.955	1025.24
LETM1	0.0465394	0.00474194	24	4	34.0649	0.977574	0.654469	24	3	10.7415	N	Y		717.95	669.554	688.083	700.432	674.565	690.472	657.158	664.271	642.008	668.155	634.099	676.53	621.379	651.896	570.515	620.5	590.498	606.149	574.25	650.554	570.386	626.566	553.096	544.686	752.372	777.33	730.267	740.002	725.062	754.444	736.268	712.787	734.764	716.887	703.1	744.281
ATP6AP1	0.0465394	0.00474194	24	17	33.8896	0.977574	0.654469	24	17	29.3556	N	Y		726.553	738.508	712.55	734.554	706.113	741.724	700.741	746.619	720.622	769.617	721.466	770.741	750.894	822.241	758.14	820.812	774.252	858.015	769.913	832.388	730.533	858.194	762.304	877.003	808.649	797.616	829.084	823.288	793.991	876.114	811.99	797.152	846.938	906.933	838.106	901.617
LMAN2L	0.0465394	0.00474194	24	4.5	33.38	1	1	24	12.5	0	N	N		403.497	414.224	434.827	403.294	420.791	396.25	384.126	429.052	362.344	425.487	373.378	395.602	360.37	379.064	341.29	358.095	341.188	354.283	351.582	380.966	306.253	379.964	312.07	325.435	225.11	234.213	218.017	233.584	230.345	233.661	225.696	243.028	223.274	266.611	265.556	237.026
FAM69A	0.0465394	0.00474194	24	17	32.2674	1	1	24	6.5	1.36609	N	N		243.905	230.846	250.251	254.961	258.877	225.412	285.424	234.796	284.634	254.825	284.172	265.155	304.51	281.724	292.898	289.198	279.605	310.327	328.143	291.526	310.202	287.313	337.785	290.532	266.636	228.681	247.263	248.422	248.667	270.992	240.767	271.789	217.37	231.974	242.387	255.416
MRPS12	0.0465394	0.00474194	24	4	31.3567	1	1	24	10.5	7.54049	N	N		497.704	525.15	532.695	503.762	501.053	504.923	458.9	472.971	398.036	470.374	431.316	431.837	446.878	460.96	393.927	438.05	369.496	426.37	362.792	435.39	362.414	462.789	371.346	410.481	541.467	526.058	546.814	510.247	541.833	514.792	519.027	522.487	572.139	528.209	532.449	502.658
TTC1	0.0465394	0.00474194	24	3.5	29.9733	0.267118	0.129367	24	22.5	18.1911	N	N		513.62	508.661	530.12	495.705	503.372	531.972	465.309	507.177	461.288	484.401	451.089	477.024	448.856	495.591	438.923	462.292	451.937	458.018	407.631	453.11	448.85	479.166	405.778	501.425	496.117	479.953	488.765	503.067	451.528	484.374	482.636	476.949	465.333	492.205	460.713	456.172
MDFIC	0.0465394	0.00474194	24	4.5	29.2738	0.588623	0.349965	24	17	19.647	N	Y		548.033	630.08	571.327	628.399	529.817	605.053	553.756	578.123	534.932	591.941	503.509	583.172	538.33	542.389	505.143	533.315	487.198	514.281	476.419	524.831	493.603	541.87	531.303	555.992	192.327	192.258	195.861	209.651	206.35	204.626	210.257	201.804	220.59	226.05	225.901	202.8
MYEOV2	0.0465394	0.00474194	24	5.5	27.6657	0.652985	0.398806	24	6.5	9.67989	N	Y		477.056	480.68	475.176	527.931	523.785	495.906	535.383	495.353	491.559	502.636	469.482	453.578	479.01	443.177	442.743	515.028	452.434	464.172	449.923	468.719	469.033	442.667	460.259	425.228	579.168	552.799	627.906	575.344	545.323	552.122	591.441	590.074	585.557	577.429	552.499	552.719
DCAF10	0.0465394	0.00474194	24	17.5	27.5016	0.383165	0.201719	24	6	6.32493	N	Y		231.43	236.842	234.369	251.17	248.671	243.445	265.769	257.178	258.882	284.749	278.654	260.466	264.963	264.877	280.164	293.451	286.061	272.965	332.219	295.745	302.304	299.011	294.636	294.465	254.615	250.811	243.275	246.986	253.903	226.287	273.114	250.218	261.381	256.584	259.318	239.069
KLHL28	0.0465394	0.00474194	24	18	26.404	1	1	24	12.5	10.6365	N	Y		292.084	336.276	283.732	317.517	308.055	307.984	333.279	292.229	326.2	316.076	303.945	345.725	333.676	329.926	334.074	353.417	380.918	338.459	389.288	341.731	367.679	322.408	418.853	367.22	410.881	431.543	370.008	360.428	359.477	341.505	388.167	343.211	454.062	356.393	405.463	394.873
PRPF3	0.0465394	0.00474194	24	6.5	26.1416	1	0.735861	24	11.3333	14.3737	N	N		562.229	558.628	563.172	558.735	578.53	571.835	547.347	550.674	531.769	572.771	548.112	575.072	532.893	542.389	542.923	521.832	528.419	523.512	533.487	520.612	502.817	507.242	523.022	487.169	450.221	452.751	456.417	515.034	468.106	455.801	478.593	493.247	515.248	491.293	462.05	447.488
RABL5	0.0465394	0.00474194	24	6	26.0928	0.126438	0.0488609	24	5.5	25.739	N	N		336.391	314.29	337.817	314.673	368.366	332.661	310.633	336.992	321.682	292.698	327.856	297.128	302.038	304.655	322.188	288.347	284.571	311.646	283.813	284.354	277.734	304.626	281.124	290.04	342.037	360.541	361.589	355.163	341.154	353.948	346.263	355.674	291.437	353.658	320.361	344.3
GSTK1	0.0465394	0.00474194	24	16	25.718	0.126438	0.0488609	24	16	18.3314	N	Y		252.508	253.331	273.001	269.178	292.281	270.969	291.406	285.05	300.899	276.8	286.931	281.781	337.136	293.891	314.123	323.647	354.597	287.031	323.557	358.184	319.855	301.819	325.581	305.771	343.676	350.398	356.271	350.855	359.913	365.931	368.318	339.856	342.962	358.216	401.008	381.591
TXNL1	0.0465394	0.00474194	24	5	23.6026	1	1	24	13.5	7.18765	N	Y		493.832	494.171	520.247	485.753	476.928	482.619	487.101	465.792	490.203	499.83	464.424	474.893	453.799	481.084	453.78	446.131	432.568	448.787	435.656	454.797	479.124	443.135	453.721	437.518	417.984	440.303	420.081	486.314	420.99	439.67	417.574	418.469	487.338	448.453	430.86	445.445
PBX1	0.0465394	0.00474194	24	17	23.2984	0.340741	0.174483	24	16	8.24451	N	N		92.9162	85.443	95.722	104.733	91.8596	89.6902	98.2747	107.685	124.697	113.152	125.532	98.0478	112.708	131.97	117.159	128.438	113.729	131.867	132.48	147.661	128.556	138.041	124.218	156.327	73.2155	76.9953	77.5466	83.7648	72.8552	87.1044	100.718	76.2159	61.1856	91.149	85.1027	97.5688
BFAR	0.0465394	0.00474194	24	4	23.0226	1	1	24	11.5	4.11942	N	Y		749.352	698.534	689.8	699.485	717.247	687.625	679.377	679.052	649.237	668.623	672.725	655.215	646.095	673.891	681.731	643.466	643.141	624.61	611.956	685.571	655.066	646.219	660.751	595.811	914.648	864.468	833.072	933.379	848.523	913.444	809.05	827.35	851.769	902.375	814.045	882.716
SOD2	0.0465394	0.00474194	24	17.5	22.6656	1	1	24	5.5	4.84551	N	N		666.33	667.555	670.913	693.798	678.741	662.474	666.559	664.271	702.098	704.625	698.475	668.004	696.517	693.546	721.209	699.179	701.744	703.73	708.259	741.682	727.461	710.795	696.055	753.121	760.567	749.667	748.435	699.316	744.694	775.644	729.284	729.085	841.034	719.166	732.953	747.346
CD97	0.0465394	0.00474194	24	7	20.5422	0.00184834	7.67819e-05	24	12	36.2785	Y	N		249.497	214.357	262.699	229.844	272.331	221.616	265.342	258.867	220.479	223.498	240.029	226.363	209.104	235.394	207.151	232.634	206.103	226.811	208.911	186.053	201.39	199.809	200.928	182.873	286.852	243.895	299.995	288.629	320.65	322.148	309.137	326.434	316.663	341.353	311.895	386.699
SEC24D	0.0465394	0.00474194	24	16.5	19.61	0.110718	0.0410599	24	20.5	13.6124	N	N	A	126.899	117.921	124.052	125.111	118.768	124.332	143.994	128.8	145.48	122.035	138.407	130.02	150.772	153.965	167.249	143.748	157.433	149.889	191.587	151.037	162.341	148.804	174.341	175.499	180.853	173.816	160.411	160.828	130.005	178.357	128.286	146.68	148.67	160.422	169.76	155.293
POP5	0.0465394	0.00474194	24	4.5	19.1286	1	1	24	8.5	3.08019	N	N		319.184	331.779	353.27	326.521	332.179	339.779	321.315	336.147	293.218	309.998	323.257	315.885	281.771	280.788	296.294	303.233	295.497	310.327	269.036	300.807	255.357	304.158	273.715	298.397	325.645	306.598	348.295	323.093	332.429	359.018	332.662	340.815	311.295	345.455	324.816	326.932
MIA3	0.0465394	0.00474194	24	17	18.3537	1	1	24	11.5	4.70455	N	N		377.257	392.239	327.945	367.277	343.314	354.49	383.271	346.283	387.193	330.103	394.99	413.08	435.509	394.507	393.502	393.394	402.274	409.227	426.993	400.373	393.566	387.451	457.644	467.014	425.634	456.9	411.218	435.577	421.862	404.183	439.261	403.13	425.616	440.706	419.276	414.795
CCDC109B	0.0465394	0.00474194	24	5.5	17.6552	0.0642263	0.0197614	24	4	16.8639	N	Y		153.14	141.905	158.821	141.698	158.667	147.111	159.803	135.135	159.034	137.465	116.336	135.562	140.885	122.143	156.637	112.277	133.595	110.768	119.232	99.9879	125.046	115.112	133.371	103.235	152.441	151.685	165.728	197.685	143.965	184.348	159.163	161.06	134.179	152.219	137.234	116.47
SUPT7L	0.0465394	0.00474194	24	20.5	17.2463	1	1	24	11.5	5.4455	N	Y		415.972	397.735	396.624	409.928	399.45	372.523	385.408	372.887	359.633	403.511	383.494	382.813	393.985	403.867	392.229	398.923	414.689	409.667	400.497	428.64	388.301	415.527	424.084	417.854	384.108	380.366	379.314	389.147	374.31	357.174	403.238	348.005	406.294	375.534	372.492	363.712
RPF1	0.0465394	0.00474194	24	4.5	16.9444	0.529975	0.306247	24	7	7.91015	N	Y		462.86	476.183	488.054	470.114	433.318	467.908	420.445	444.255	433.728	444.19	431.316	442.92	434.026	434.753	429.16	414.234	415.186	405.271	418.841	418.515	432.616	383.707	397.932	426.703	467.159	471.193	488.765	478.177	476.394	477.922	478.593	484.139	576.97	490.382	440.217	480.181
GFOD2	0.0465394	0.00474194	24	7.5	16.261	0.383165	0.201719	24	16	19.2474	N	Y		290.793	319.287	316.355	304.721	316.405	307.984	323.452	317.144	311.742	340.39	314.521	300.964	290.669	325.714	296.294	302.807	291.524	298.459	276.17	296.588	286.07	315.857	287.662	286.107	391.211	399.269	384.188	346.547	390.888	401.879	377.875	389.708	393.413	413.817	401.008	460.77
TSC22D3	0.0465394	0.00474194	24	15.5	15.5602	1	1	24	16.5	1.53667	N	Y		101.089	86.4424	89.2833	88.6203	116.448	104.876	102.12	114.02	116.113	110.814	115.876	122.773	113.697	142.734	129.045	162.887	123.165	145.933	119.742	148.083	136.893	129.15	135.55	148.461	74.8547	65.9301	83.3072	59.3533	78.5266	84.3392	80.5006	85.3235	66.0161	81.5784	84.2116	84.2871
COQ10B	0.0465394	0.00474194	24	2.5	14.6219	1	1	24	13.5	6.12991	N	Y	A	303.698	302.798	278.581	308.039	305.735	273.816	291.406	277.448	280.568	245.473	252.904	268.566	264.469	280.32	257.666	247.52	276.625	260.218	295.532	262.837	274.224	273.742	302.481	269.885	379.191	400.191	392.164	411.165	387.834	364.087	392.946	418.948	467.48	434.781	427.296	420.925
HSF2BP	0.0465394	0.00474194	24	17	13.9291	0.588623	0.349965	24	18.5	8.61162	N	N		94.6369	82.445	89.7126	75.351	92.7875	83.0465	90.5836	88.2598	107.528	84.1623	100.242	99.753	112.708	97.8078	122.678	103.771	103.797	106.812	132.48	96.6127	118.903	112.773	149.933	100.285	114.194	94.5152	111.224	119.664	103.83	120.287	110.642	103.539	94.4621	116.215	134.115	114.426
GYG2	0.0465394	0.00474194	24	16	13.8932	0.236964	0.110879	24	17.5	9.44593	N	Y		82.162	76.449	79.4107	86.7247	82.1169	88.7411	96.5655	85.726	100.751	82.292	102.541	84.4064	121.112	90.3202	130.743	93.9894	119.192	106.373	128.404	98.7222	109.69	98.2665	118.116	102.251	28.412	29.9682	42.0967	44.0363	42.3171	33.1826	37.1259	35.9509	24.1522	35.5481	49.4576	42.399
GAMT	0.0465394	0.00474194	24	16	13.6543	0.0964854	0.0343842	24	17	16.2861	N	Y		116.145	118.421	132.208	125.585	134.542	128.129	112.802	144.425	138.703	139.803	136.568	142.383	134.459	140.394	167.674	153.105	159.42	150.768	143.18	164.537	148.739	158.63	128.14	175.007	95.0709	96.8205	133.823	93.3379	111.246	123.513	120.935	108.811	112.71	127.153	116.738	115.448
TMEM87B	0.0465394	0.00474194	24	17	13.6068	0.236964	0.110879	24	20	22.1552	N	N		172.067	168.887	157.534	163.497	163.77	167.517	181.167	157.516	177.558	173	188.069	178.618	171.534	178.3	181.257	191.381	194.681	188.13	181.396	182.256	219.379	206.828	240.154	211.385	343.676	301.988	262.772	320.221	277.461	270.531	263.924	281.376	276.946	305.805	320.806	283.511
PPAP2A	0.0465394	0.00474194	24	18	13.3712	1	1	24	16.5	0.334156	N	N		94.2067	97.435	82.4154	105.207	99.7466	96.8085	94.0019	99.2395	100.751	104.735	111.738	101.458	122.595	116.995	112.914	118.656	106.28	119.559	113.627	116.02	121.097	139.445	116.808	130.272	115.834	104.197	98.8165	93.3379	109.065	107.383	108.437	103.059	107.343	106.644	108.718	100.123
TMEM126A	0.0465394	0.00474194	24	4.5	10.7282	0.427453	0.232515	24	2	4.12446	N	Y		364.782	374.75	362.284	385.759	379.965	375.845	372.162	355.151	378.609	381.068	377.517	369.171	369.268	353.325	363.364	338.957	360.06	319.558	343.429	347.215	357.588	369.201	377.883	369.678	479.726	504.85	483.891	495.409	463.743	478.383	467.198	489.891	494.852	498.129	479.872	449.021
AACS	0.0465394	0.00474194	24	16.5	10.34	1	1	24	16.5	9.52214	N	Y		340.693	379.747	360.997	324.625	363.263	360.185	368.744	374.154	372.284	369.379	365.101	358.088	365.313	394.507	399.021	368.728	407.24	414.942	377.568	378.013	393.566	383.239	394.446	376.561	423.448	449.524	455.088	467.647	440.185	461.331	450.289	434.766	428.836	484.457	472.743	497.039
IGFBPL1	0.0465394	0.00474194	24	6.5	9.92763	0.0738391	0.0238555	24	5	5.99703	N	Y		179.81	174.883	177.279	182.928	196.246	183.651	173.476	188.766	190.208	192.171	182.551	175.207	187.353	168.941	186.351	142.473	183.258	167.911	161.524	148.927	173.31	166.585	172.597	159.276	135.503	136.932	163.069	153.17	164.906	164.991	161.369	154.349	152.427	143.104	148.818	150.184
E2F6	0.0465394	0.00474194	24	3	8.86206	1	1	24	5.5	0	N	Y		263.263	301.299	277.293	261.122	258.413	269.545	252.523	260.979	252.556	276.8	274.056	243.841	255.571	239.138	230.923	254.324	225.968	234.284	233.369	260.728	232.103	253.153	256.281	261.036	248.605	277.552	271.192	283.843	250.412	263.157	259.881	238.235	289.29	248.381	268.23	248.775
ACSL1	0.0465394	0.00474194	24	5	8.74406	1	1	24	17.5	4.00649	N	N		442.212	445.703	464.016	436.941	491.774	458.417	474.709	445.522	456.318	437.644	438.214	439.51	448.361	445.517	426.613	415.51	413.696	406.59	455.018	444.25	435.248	394.938	434.108	430.636	329.47	329.651	326.582	339.846	325.449	313.392	313.18	313.492	373.554	331.327	305.657	311.607
PLA2G6	0.0465394	0.00474194	24	17	8.32756	0.383165	0.201719	24	15	2.79295	N	Y		50.3296	44.97	50.6511	39.8081	52.4249	46.0315	59.3921	46.4525	57.3786	57.5109	51.9603	54.5658	56.3541	62.2414	67.9184	59.1155	67.0456	59.3402	64.2019	60.3302	69.3238	67.8507	63.6343	63.9072	45.8963	39.6503	36.7792	33.9846	41.0083	38.7131	52.5643	44.5791	31.1295	51.0435	47.2298	48.529
FOS	0.0465394	0.00474194	24	20.5	8.02992	0.0193628	0.00380362	24	13	12.6947	Y	N		47.3184	113.924	35.6275	127.481	26.9084	39.8623	34.6098	34.6283	31.1742	43.0163	23.4511	40.0717	53.3881	49.6059	41.6	42.9544	44.6971	46.593	56.5588	54.4238	60.1099	49.1333	86.2986	51.1257	21.309	21.2083	31.0186	24.8901	35.7732	27.1913	44.1099	35.9509	109.49	45.1188	41.883	34.7365
HCCS	0.0465394	0.00474194	24	4	7.45101	0.110718	0.0410599	24	6.5	9.17478	N	Y		196.156	173.884	203.892	188.614	188.823	170.839	189.713	177.364	195.178	178.611	197.725	172.223	168.074	171.749	173.617	152.254	160.413	151.208	159.486	160.318	170.677	176.88	173.469	141.579	166.101	197.79	189.657	210.13	205.042	209.696	194.084	185.027	232.935	198.705	176.443	201.778
ZNF337	0.0465394	0.00474194	24	16	6.70212	0.0193628	0.00380362	24	6	16.2794	Y	Y		225.838	195.869	199.6	215.153	203.669	192.193	223.468	215.371	230.418	215.081	246.466	219.116	229.866	220.887	224.555	224.129	254.277	240.438	231.331	218.117	223.767	201.212	217.49	205.486	255.162	256.344	262.772	222.096	272.225	253.939	271.276	256.45	257.087	251.116	259.318	238.047
MAOB	0.0465394	0.00474194	24	18	6.34398	0.383165	0.201719	24	20	1.52823	N	N		25.3799	16.489	16.3114	18.4823	18.5575	15.6602	14.9548	23.2263	11.7468	24.3135	19.7725	23.0199	20.7621	26.2069	22.498	36.5751	18.3755	25.4943	29.0437	33.7512	25.0092	35.0952	27.8945	27.5292	31.1439	29.0461	32.7911	19.1462	30.1018	38.2522	21.6874	32.5955	28.9827	30.0792	22.2782	28.0957
PRAF2	0.0465394	0.00474194	24	16	4.65635	0.427453	0.232515	24	20	2.29383	N	N		38.7151	32.978	36.486	27.4865	35.2593	29.8967	45.7191	37.5843	56.475	37.873	42.7638	38.3665	35.0978	44.4581	42.8735	45.9315	50.6567	48.3512	51.4634	40.0795	42.5596	52.4088	37.9191	42.277	48.0818	53.0207	57.1629	50.2589	45.8072	54.3827	53.6671	48.4139	44.0107	56.9681	47.6753	52.6156
RAE1	0.0465394	0.00474194	24	4.5	22.9656	0.340741	0.174483	24	6	13.5905	N	N		454.257	426.216	458.865	392.868	442.596	408.114	412.326	439.61	412.946	410.525	406.946	407.112	397.939	374.852	377.372	367.026	394.824	368.788	397.95	367.044	359.343	386.983	383.549	357.388	469.344	484.102	475.028	492.537	464.179	495.435	452.127	511.462	561.942	497.218	459.822	487.844
SOD2	0.0465394	0.00474194	24	17.5	22.6656	1	1	24	5.5	4.84551	N	N		666.33	667.555	670.913	693.798	678.741	662.474	666.559	664.271	702.098	704.625	698.475	668.004	696.517	693.546	721.209	699.179	701.744	703.73	708.259	741.682	727.461	710.795	696.055	753.121	760.567	749.667	748.435	699.316	744.694	775.644	729.284	729.085	841.034	719.166	732.953	747.346
ARL4C	0.0465394	0.00474194	24	18	20.8775	0.0479328	0.0134079	24	14	22.143	Y	Y		213.793	259.827	222.779	243.587	232.897	229.683	252.95	231.84	236.743	227.238	267.159	256.63	245.684	262.537	269.127	277.715	244.841	270.767	273.113	265.791	290.019	293.396	306.404	268.41	328.377	350.398	409.446	343.196	370.82	386.67	433.012	387.311	425.616	425.666	408.137	435.228
CD97	0.0465394	0.00474194	24	7	20.5422	0.00184834	7.67819e-05	24	12	36.2785	N	Y		249.497	214.357	262.699	229.844	272.331	221.616	265.342	258.867	220.479	223.498	240.029	226.363	209.104	235.394	207.151	232.634	206.103	226.811	208.911	186.053	201.39	199.809	200.928	182.873	286.852	243.895	299.995	288.629	320.65	322.148	309.137	326.434	316.663	341.353	311.895	386.699
SEC24D	0.0465394	0.00474194	24	16.5	19.61	0.110718	0.0410599	24	20.5	13.6124	N	N		126.899	117.921	124.052	125.111	118.768	124.332	143.994	128.8	145.48	122.035	138.407	130.02	150.772	153.965	167.249	143.748	157.433	149.889	191.587	151.037	162.341	148.804	174.341	175.499	180.853	173.816	160.411	160.828	130.005	178.357	128.286	146.68	148.67	160.422	169.76	155.293
POP5	0.0465394	0.00474194	24	4.5	19.1286	1	1	24	8.5	3.08019	N	N		319.184	331.779	353.27	326.521	332.179	339.779	321.315	336.147	293.218	309.998	323.257	315.885	281.771	280.788	296.294	303.233	295.497	310.327	269.036	300.807	255.357	304.158	273.715	298.397	325.645	306.598	348.295	323.093	332.429	359.018	332.662	340.815	311.295	345.455	324.816	326.932
MIA3	0.0465394	0.00474194	24	17	18.3537	1	1	24	11.5	4.70455	N	N		377.257	392.239	327.945	367.277	343.314	354.49	383.271	346.283	387.193	330.103	394.99	413.08	435.509	394.507	393.502	393.394	402.274	409.227	426.993	400.373	393.566	387.451	457.644	467.014	425.634	456.9	411.218	435.577	421.862	404.183	439.261	403.13	425.616	440.706	419.276	414.795
CCDC109B	0.0465394	0.00474194	24	5.5	17.6552	0.0642263	0.0197614	24	4	16.8639	Y	N		153.14	141.905	158.821	141.698	158.667	147.111	159.803	135.135	159.034	137.465	116.336	135.562	140.885	122.143	156.637	112.277	133.595	110.768	119.232	99.9879	125.046	115.112	133.371	103.235	152.441	151.685	165.728	197.685	143.965	184.348	159.163	161.06	134.179	152.219	137.234	116.47
SUPT7L	0.0465394	0.00474194	24	20.5	17.2463	1	1	24	11.5	5.4455	Y	N		415.972	397.735	396.624	409.928	399.45	372.523	385.408	372.887	359.633	403.511	383.494	382.813	393.985	403.867	392.229	398.923	414.689	409.667	400.497	428.64	388.301	415.527	424.084	417.854	384.108	380.366	379.314	389.147	374.31	357.174	403.238	348.005	406.294	375.534	372.492	363.712
RPF1	0.0465394	0.00474194	24	4.5	16.9444	0.529975	0.306247	24	7	7.91015	Y	N		462.86	476.183	488.054	470.114	433.318	467.908	420.445	444.255	433.728	444.19	431.316	442.92	434.026	434.753	429.16	414.234	415.186	405.271	418.841	418.515	432.616	383.707	397.932	426.703	467.159	471.193	488.765	478.177	476.394	477.922	478.593	484.139	576.97	490.382	440.217	480.181
GFOD2	0.0465394	0.00474194	24	7.5	16.261	0.383165	0.201719	24	16	19.2474	Y	N		290.793	319.287	316.355	304.721	316.405	307.984	323.452	317.144	311.742	340.39	314.521	300.964	290.669	325.714	296.294	302.807	291.524	298.459	276.17	296.588	286.07	315.857	287.662	286.107	391.211	399.269	384.188	346.547	390.888	401.879	377.875	389.708	393.413	413.817	401.008	460.77
TSC22D3	0.0465394	0.00474194	24	15.5	15.5602	1	1	24	16.5	1.53667	Y	N		101.089	86.4424	89.2833	88.6203	116.448	104.876	102.12	114.02	116.113	110.814	115.876	122.773	113.697	142.734	129.045	162.887	123.165	145.933	119.742	148.083	136.893	129.15	135.55	148.461	74.8547	65.9301	83.3072	59.3533	78.5266	84.3392	80.5006	85.3235	66.0161	81.5784	84.2116	84.2871
COQ10B	0.0465394	0.00474194	24	2.5	14.6219	1	1	24	13.5	6.12991	Y	N		303.698	302.798	278.581	308.039	305.735	273.816	291.406	277.448	280.568	245.473	252.904	268.566	264.469	280.32	257.666	247.52	276.625	260.218	295.532	262.837	274.224	273.742	302.481	269.885	379.191	400.191	392.164	411.165	387.834	364.087	392.946	418.948	467.48	434.781	427.296	420.925
HSF2BP	0.0465394	0.00474194	24	17	13.9291	0.588623	0.349965	24	18.5	8.61162	N	N		94.6369	82.445	89.7126	75.351	92.7875	83.0465	90.5836	88.2598	107.528	84.1623	100.242	99.753	112.708	97.8078	122.678	103.771	103.797	106.812	132.48	96.6127	118.903	112.773	149.933	100.285	114.194	94.5152	111.224	119.664	103.83	120.287	110.642	103.539	94.4621	116.215	134.115	114.426
GYG2	0.0465394	0.00474194	24	16	13.8932	0.236964	0.110879	24	17.5	9.44593	Y	N		82.162	76.449	79.4107	86.7247	82.1169	88.7411	96.5655	85.726	100.751	82.292	102.541	84.4064	121.112	90.3202	130.743	93.9894	119.192	106.373	128.404	98.7222	109.69	98.2665	118.116	102.251	28.412	29.9682	42.0967	44.0363	42.3171	33.1826	37.1259	35.9509	24.1522	35.5481	49.4576	42.399
GAMT	0.0465394	0.00474194	24	16	13.6543	0.0964854	0.0343842	24	17	16.2861	Y	N		116.145	118.421	132.208	125.585	134.542	128.129	112.802	144.425	138.703	139.803	136.568	142.383	134.459	140.394	167.674	153.105	159.42	150.768	143.18	164.537	148.739	158.63	128.14	175.007	95.0709	96.8205	133.823	93.3379	111.246	123.513	120.935	108.811	112.71	127.153	116.738	115.448
TMEM87B	0.0465394	0.00474194	24	17	13.6068	0.236964	0.110879	24	20	22.1552	N	N		172.067	168.887	157.534	163.497	163.77	167.517	181.167	157.516	177.558	173	188.069	178.618	171.534	178.3	181.257	191.381	194.681	188.13	181.396	182.256	219.379	206.828	240.154	211.385	343.676	301.988	262.772	320.221	277.461	270.531	263.924	281.376	276.946	305.805	320.806	283.511
PPAP2A	0.0465394	0.00474194	24	18	13.3712	1	1	24	16.5	0.334156	N	N		94.2067	97.435	82.4154	105.207	99.7466	96.8085	94.0019	99.2395	100.751	104.735	111.738	101.458	122.595	116.995	112.914	118.656	106.28	119.559	113.627	116.02	121.097	139.445	116.808	130.272	115.834	104.197	98.8165	93.3379	109.065	107.383	108.437	103.059	107.343	106.644	108.718	100.123
TMEM126A	0.0465394	0.00474194	24	4.5	10.7282	0.427453	0.232515	24	2	4.12446	Y	N		364.782	374.75	362.284	385.759	379.965	375.845	372.162	355.151	378.609	381.068	377.517	369.171	369.268	353.325	363.364	338.957	360.06	319.558	343.429	347.215	357.588	369.201	377.883	369.678	479.726	504.85	483.891	495.409	463.743	478.383	467.198	489.891	494.852	498.129	479.872	449.021
AACS	0.0465394	0.00474194	24	16.5	10.34	1	1	24	16.5	9.52214	Y	N		340.693	379.747	360.997	324.625	363.263	360.185	368.744	374.154	372.284	369.379	365.101	358.088	365.313	394.507	399.021	368.728	407.24	414.942	377.568	378.013	393.566	383.239	394.446	376.561	423.448	449.524	455.088	467.647	440.185	461.331	450.289	434.766	428.836	484.457	472.743	497.039
IGFBPL1	0.0465394	0.00474194	24	6.5	9.92763	0.0738391	0.0238555	24	5	5.99703	Y	N		179.81	174.883	177.279	182.928	196.246	183.651	173.476	188.766	190.208	192.171	182.551	175.207	187.353	168.941	186.351	142.473	183.258	167.911	161.524	148.927	173.31	166.585	172.597	159.276	135.503	136.932	163.069	153.17	164.906	164.991	161.369	154.349	152.427	143.104	148.818	150.184
E2F6	0.0465394	0.00474194	24	3	8.86206	1	1	24	5.5	0	Y	N		263.263	301.299	277.293	261.122	258.413	269.545	252.523	260.979	252.556	276.8	274.056	243.841	255.571	239.138	230.923	254.324	225.968	234.284	233.369	260.728	232.103	253.153	256.281	261.036	248.605	277.552	271.192	283.843	250.412	263.157	259.881	238.235	289.29	248.381	268.23	248.775
ACSL1	0.0465394	0.00474194	24	5	8.74406	1	1	24	17.5	4.00649	N	N		442.212	445.703	464.016	436.941	491.774	458.417	474.709	445.522	456.318	437.644	438.214	439.51	448.361	445.517	426.613	415.51	413.696	406.59	455.018	444.25	435.248	394.938	434.108	430.636	329.47	329.651	326.582	339.846	325.449	313.392	313.18	313.492	373.554	331.327	305.657	311.607
PLA2G6	0.0465394	0.00474194	24	17	8.32756	0.383165	0.201719	24	15	2.79295	Y	N		50.3296	44.97	50.6511	39.8081	52.4249	46.0315	59.3921	46.4525	57.3786	57.5109	51.9603	54.5658	56.3541	62.2414	67.9184	59.1155	67.0456	59.3402	64.2019	60.3302	69.3238	67.8507	63.6343	63.9072	45.8963	39.6503	36.7792	33.9846	41.0083	38.7131	52.5643	44.5791	31.1295	51.0435	47.2298	48.529
FOS	0.0465394	0.00474194	24	20.5	8.02992	0.0193628	0.00380362	24	13	12.6947	N	Y		47.3184	113.924	35.6275	127.481	26.9084	39.8623	34.6098	34.6283	31.1742	43.0163	23.4511	40.0717	53.3881	49.6059	41.6	42.9544	44.6971	46.593	56.5588	54.4238	60.1099	49.1333	86.2986	51.1257	21.309	21.2083	31.0186	24.8901	35.7732	27.1913	44.1099	35.9509	109.49	45.1188	41.883	34.7365
HCCS	0.0465394	0.00474194	24	4	7.45101	0.110718	0.0410599	24	6.5	9.17478	Y	N		196.156	173.884	203.892	188.614	188.823	170.839	189.713	177.364	195.178	178.611	197.725	172.223	168.074	171.749	173.617	152.254	160.413	151.208	159.486	160.318	170.677	176.88	173.469	141.579	166.101	197.79	189.657	210.13	205.042	209.696	194.084	185.027	232.935	198.705	176.443	201.778
ZNF337	0.0465394	0.00474194	24	16	6.70212	0.0193628	0.00380362	24	6	16.2794	Y	Y		225.838	195.869	199.6	215.153	203.669	192.193	223.468	215.371	230.418	215.081	246.466	219.116	229.866	220.887	224.555	224.129	254.277	240.438	231.331	218.117	223.767	201.212	217.49	205.486	255.162	256.344	262.772	222.096	272.225	253.939	271.276	256.45	257.087	251.116	259.318	238.047
MAOB	0.0465394	0.00474194	24	18	6.34398	0.383165	0.201719	24	20	1.52823	N	N		25.3799	16.489	16.3114	18.4823	18.5575	15.6602	14.9548	23.2263	11.7468	24.3135	19.7725	23.0199	20.7621	26.2069	22.498	36.5751	18.3755	25.4943	29.0437	33.7512	25.0092	35.0952	27.8945	27.5292	31.1439	29.0461	32.7911	19.1462	30.1018	38.2522	21.6874	32.5955	28.9827	30.0792	22.2782	28.0957
PRAF2	0.0465394	0.00474194	24	16	4.65635	0.427453	0.232515	24	20	2.29383	N	N		38.7151	32.978	36.486	27.4865	35.2593	29.8967	45.7191	37.5843	56.475	37.873	42.7638	38.3665	35.0978	44.4581	42.8735	45.9315	50.6567	48.3512	51.4634	40.0795	42.5596	52.4088	37.9191	42.277	48.0818	53.0207	57.1629	50.2589	45.8072	54.3827	53.6671	48.4139	44.0107	56.9681	47.6753	52.6156
[truncated: 12 more columns]
