# Supplementary material for: Ribosome profiling reveals an important role for translational control in circadian gene expression
Source: HighWire-hosted journal article supplement (doi:10.1101/gr.191296.115), 2015-09-03
Supplement: Supplemental_Table_S6.xlsx [file Supplemental_Table_S6.xlsx]

## Sheet: Table S6
Supplementary Table S6: NIH DAVID results for RNA and RPF Cyclers.
Lists of the top twelve (when available) enriched Gene Ontology (GO) terms for biological processes. These results are listed for all three gene groups (RPF-only cyclers, RNA-only cyclers, RNA and RPF cyclers), across all statistical cutoffs used in this paper. GO term id, number of genes, DAVID p-values, gene symbols, fold enrichment, Benjamini-corrected p-values, and FDR values are listed for e…
RNA-only Cyclers (RNA - BHQ < 0.05; RPF - ADJP > 0.2)
	Term	Count	PValue	Genes	Fold Enrichment	Benjamini	FDR
	GO:0006350~transcription	38	5.18806e-06	ZNF808, BCLAF1, COPS5, ZNF532, E2F6, POLR2K, ZBTB9, ZNF57, FOXO3, IVNS1ABP, GLI2, ZKSCAN5, GTF2H2C, MDFIC, ATF6B, SUPT7L, CHD6, GTF3C2, POLR3G, ZNF623, KLF7, ZNF45, IKZF2, BRF2, KLF11, ZNF337, DRG1, ZNF687, GTF2H1, MED6, MNAT1, DR1, TRPS1, PARP14, GTF2F2, TCEB3, SMARCA4, KLF3	2.22728	0.00646411	0.00842965
	GO:0051252~regulation of RNA metabolic process	36	8.45263e-06	ZNF808, E2F6, POLR2K, ZNF57, FOXO3, GLI2, ZKSCAN5, TSC22D3, TRAK2, MDFIC, ATF6B, CSDE1, LIMD1, CHD6, POLR3G, SATB1, KLF7, ZNF45, IKZF2, BRF2, KLF11, ZNF337, ELAVL1, ELAVL2, MBNL1, MECOM, TRIM22, SIRT3, GTF2H1, MED6, MNAT1, DR1, TRPS1, GTF2F2, TCEB3, SMARCA4	2.24604	0.00526898	0.0137336
	GO:0045449~regulation of transcription	46	3.04555e-05	ZNF808, BCLAF1, ZNF532, E2F6, POLR2K, ZBTB9, ATP6AP1, ZNF57, FOXO3, GLI2, ZKSCAN5, TSC22D3, GTF2H2C, TRAK2, MDFIC, ATF6B, CSDE1, SUPT7L, RNF10, LIMD1, CHD6, PSMD9, POLR3G, SATB1, ZNF623, KLF7, ZNF45, IKZF2, BRF2, KLF11, ZNF337, ELAVL2, ZNF687, MECOM, TRIM22, GTF2H1, SIRT3, MED6, MNAT1, DR1, TRPS1, PARP14, GTF2F2, TCEB3, SMARCA4, KLF3	1.87714	0.0126098	0.0494751
	GO:0006355~regulation of transcription, DNA-dependent	34	3.31862e-05	ZNF808, E2F6, POLR2K, ZNF57, FOXO3, GLI2, ZKSCAN5, TSC22D3, TRAK2, MDFIC, ATF6B, CSDE1, LIMD1, CHD6, POLR3G, SATB1, KLF7, ZNF45, IKZF2, BRF2, KLF11, ZNF337, ELAVL2, MECOM, TRIM22, SIRT3, GTF2H1, MED6, MNAT1, DR1, TRPS1, GTF2F2, TCEB3, SMARCA4	2.16924	0.0103173	0.0539099
	GO:0006368~RNA elongation from RNA polymerase II promoter	6	6.31818e-05	MNAT1, GTF2H2C, POLR2K, GTF2F2, TCEB3, GTF2H1	14.4413	0.0156718	0.102613
	GO:0006351~transcription, DNA-dependent	12	0.000122239	MNAT1, GTF2H2C, COPS5, BRF2, POLR2K, TRPS1, GTF2F2, KLF11, TCEB3, GTF3C2, IVNS1ABP, GTF2H1	4.30671	0.0251464	0.198438
	GO:0006354~RNA elongation	6	0.000125386	MNAT1, GTF2H2C, POLR2K, GTF2F2, TCEB3, GTF2H1	12.4929	0.0221429	0.203543
	GO:0032774~RNA biosynthetic process	12	0.000169051	MNAT1, GTF2H2C, COPS5, BRF2, POLR2K, TRPS1, GTF2F2, KLF11, TCEB3, GTF3C2, IVNS1ABP, GTF2H1	4.14783	0.0260705	0.274333
	GO:0006366~transcription from RNA polymerase II promoter	9	0.000749596	MNAT1, GTF2H2C, COPS5, POLR2K, TRPS1, GTF2F2, KLF11, TCEB3, GTF2H1	4.66631	0.0989095	1.21107
	GO:0006357~regulation of transcription from RNA polymerase II promoter	16	0.00190921	SATB1, KLF7, IKZF2, E2F6, KLF11, FOXO3, GLI2, MECOM, GTF2H1, MED6, MNAT1, TRAK2, DR1, GTF2F2, TCEB3, SMARCA4	2.50903	0.21249	3.05749
	GO:0010604~positive regulation of macromolecule metabolic process	17	0.00322311	ANAPC1, KLF7, IKZF2, LYN, FOXO3, GLI2, MECOM, GTF2H1, MED6, RNF8, MNAT1, MDFIC, GTF2F2, RNF10, PSMD6, SMARCA4, PSMD9	2.29068	0.30709	5.11042
	GO:0045935~positive regulation of nucleobase, nucleoside, nucleotide and nucleic acid metabolic process	14	0.00407385	MED6, RNF8, MNAT1, KLF7, IKZF2, MDFIC, GTF2F2, RNF10, FOXO3, GLI2, MECOM, SMARCA4, GTF2H1, PSMD9	2.51053	0.346378	6.41783
RPF-only Cyclers (RPF - BHQ < 0.2; RNA - ADJP > 0.2)
	Term	Count	PValue	Genes	Fold Enrichment	Benjamini	FDR
	GO:0006414~translational elongation	11	1.81436e-12	RPL18, RPL8, RPL3, RPL27, RPS15A, RPS9, RPL10A, RPL38, RPS5, RPS8, UBA52	31.684	7.45688e-10	2.54062e-09
	GO:0000398~nuclear mRNA splicing, via spliceosome	7	3.58379e-06	PRMT7, U2AF2, PCBP2, TRA2A, SF3A1, SF3B2, GEMIN5	16.8021	0.000736198	0.0050183
	GO:0000377~RNA splicing, via transesterification reactions with bulged adenosine as nucleophile	7	3.58379e-06	PRMT7, U2AF2, PCBP2, TRA2A, SF3A1, SF3B2, GEMIN5	16.8021	0.000736198	0.0050183
	GO:0000375~RNA splicing, via transesterification reactions	7	3.76757e-06	PRMT7, U2AF2, PCBP2, TRA2A, SF3A1, SF3B2, GEMIN5	16.656	0.000516025	0.00527564
	GO:0008380~RNA splicing	9	7.37232e-06	PRMT7, U2AF2, SRRM2, PCBP2, TRA2A, PABPC1, SF3A1, SF3B2, GEMIN5	8.7745	0.000757222	0.0103231
	GO:0006397~mRNA processing	9	4.11131e-05	PRMT7, U2AF2, SRRM2, PCBP2, TRA2A, PABPC1, SF3A1, SF3B2, GEMIN5	6.89835	0.00337386	0.0575558
	GO:0016071~mRNA metabolic process	10	4.37614e-05	PRMT7, U2AF2, SRRM2, PCBP2, TRA2A, PABPC3, PABPC1, SF3A1, SF3B2, GEMIN5	5.83442	0.00299323	0.0612622
	GO:0006396~RNA processing	10	0.00573227	PRMT7, U2AF2, SRRM2, PCBP2, TRA2A, PABPC1, RPL10A, SF3A1, SF3B2, GEMIN5	2.94653	0.286473	7.73456
	GO:0051603~proteolysis involved in cellular protein catabolic process	8	0.0108841	NCSTN, RNF123, OTUB1, USP5, PSMD3, USP51, UBA52, FBXL17	3.21765	0.430066	14.2082
	GO:0044257~cellular protein catabolic process	8	0.0113554	NCSTN, RNF123, OTUB1, USP5, PSMD3, USP51, UBA52, FBXL17	3.19107	0.406389	14.7789
	GO:0030163~protein catabolic process	8	0.0140041	NCSTN, RNF123, OTUB1, USP5, PSMD3, USP51, UBA52, FBXL17	3.06164	0.439897	17.9209
	GO:0019941~modification-dependent protein catabolic process	7	0.0261263	RNF123, OTUB1, USP5, PSMD3, USP51, UBA52, FBXL17	3.0212	0.628108	30.9758
RPF-only Cyclers (RPF - BHQ < 0.15; RNA - ADJP > 0.2)
	Term	Count	PValue	Genes	Fold Enrichment	Benjamini	FDR
	GO:0006414~translational elongation	7	6.94589e-08	RPL18, RPL3, RPL10A, RPL38, RPS5, RPS8, UBA52	32.0533	1.77813e-05	9.05704e-05
	GO:0008380~RNA splicing	8	2.6714e-06	PRMT7, U2AF2, SRRM2, PCBP2, TRA2A, PABPC1, SF3A1, SF3B2	12.3993	0.000341881	0.00348329
	GO:0000377~RNA splicing, via transesterification reactions with bulged adenosine as nucleophile	6	5.56638e-06	PRMT7, U2AF2, PCBP2, TRA2A, SF3A1, SF3B2	22.8952	0.000474887	0.007258
	GO:0000398~nuclear mRNA splicing, via spliceosome	6	5.56638e-06	PRMT7, U2AF2, PCBP2, TRA2A, SF3A1, SF3B2	22.8952	0.000474887	0.007258
	GO:0000375~RNA splicing, via transesterification reactions	6	5.80691e-06	PRMT7, U2AF2, PCBP2, TRA2A, SF3A1, SF3B2	22.6961	0.000371574	0.00757161
	GO:0016071~mRNA metabolic process	9	7.81481e-06	PRMT7, U2AF2, SRRM2, PCBP2, TRA2A, PABPC3, PABPC1, SF3A1, SF3B2	8.34771	0.00040004	0.0101896
	GO:0006397~mRNA processing	8	1.27925e-05	PRMT7, U2AF2, SRRM2, PCBP2, TRA2A, PABPC1, SF3A1, SF3B2	9.74809	0.000545666	0.0166793
	GO:0006396~RNA processing	9	0.00089121	PRMT7, U2AF2, SRRM2, PCBP2, TRA2A, PABPC1, RPL10A, SF3A1, SF3B2	4.2158	0.0320815	1.15587
	GO:0051603~proteolysis involved in cellular protein catabolic process	6	0.017246	NCSTN, RNF123, OTUB1, USP5, PSMD3, UBA52	3.83643	0.426896	20.2952
	GO:0044257~cellular protein catabolic process	6	0.0178131	NCSTN, RNF123, OTUB1, USP5, PSMD3, UBA52	3.80474	0.400256	20.8928
	GO:0030163~protein catabolic process	6	0.0209113	NCSTN, RNF123, OTUB1, USP5, PSMD3, UBA52	3.65042	0.417837	24.0855
	GO:0044265~cellular macromolecule catabolic process	6	0.0436491	NCSTN, RNF123, OTUB1, USP5, PSMD3, UBA52	2.99661	0.646076	44.1195
RPF-only Cyclers (RPF - BHQ < 0.1; RNA - ADJP > 0.2)
	Term	Count	PValue	Genes	Fold Enrichment	Benjamini	FDR
	GO:0008380~RNA splicing	4	0.000887805	PRMT7, SRRM2, PCBP2, SF3B2	18.5989	0.0784648	0.96565
	GO:0006397~mRNA processing	4	0.0017734	PRMT7, SRRM2, PCBP2, SF3B2	14.6221	0.0784043	1.92045
	GO:0000398~nuclear mRNA splicing, via spliceosome	3	0.00284203	PRMT7, PCBP2, SF3B2	34.3428	0.0835791	3.06144
	GO:0000377~RNA splicing, via transesterification reactions with bulged adenosine as nucleophile	3	0.00284203	PRMT7, PCBP2, SF3B2	34.3428	0.0835791	3.06144
	GO:0000375~RNA splicing, via transesterification reactions	3	0.00289104	PRMT7, PCBP2, SF3B2	34.0441	0.0644216	3.11349
	GO:0016071~mRNA metabolic process	4	0.00384679	PRMT7, SRRM2, PCBP2, SF3B2	11.1303	0.0684611	4.12324
	GO:0006396~RNA processing	4	0.0248385	PRMT7, SRRM2, PCBP2, SF3B2	5.62107	0.320003	24.0264
RNA and RPF Cyclers (RNA - BHQ < 0.05; RPF - BHQ < 0.2)
	Term	Count	PValue	Genes	Fold Enrichment	Benjamini	FDR
	GO:0048511~rhythmic process	10	1.33941e-09	AFP, CRY2, NR1D1, TEF, PER2, ARNTL, PER3, MMP14, NFIL3, CRY1	20.938	1.2778e-06	2.10353e-06
	GO:0007623~circadian rhythm	6	9.49554e-07	CRY2, NR1D1, PER2, ARNTL, PER3, CRY1	34.0783	0.000452835	0.00149125
	GO:0044093~positive regulation of molecular function	11	5.82931e-05	PSMB4, PLCE1, UACA, PLK1, BBC3, SERINC1, CDC20, EIF2AK3, CALM2, CDC25B, F2R	5.09896	0.018367	0.0915093
	GO:0043085~positive regulation of catalytic activity	10	0.000104744	PSMB4, PLCE1, UACA, PLK1, BBC3, SERINC1, CDC20, EIF2AK3, CDC25B, F2R	5.34779	0.0246732	0.164372
	GO:0019953~sexual reproduction	9	0.000163448	AFP, GMCL1, SPAG1, PTTG1, EIF5A2, PPAP2B, CDC25B, GLI1, SREBF2	5.79066	0.0307071	0.256385
	GO:0048609~reproductive process in a multicellular organism	9	0.000271184	AFP, GMCL1, PTTG1, MMP14, EIF5A2, PPAP2B, CDC25B, GLI1, SREBF2	5.37104	0.0422075	0.425043
	GO:0032504~multicellular organism reproduction	9	0.000273379	AFP, GMCL1, PTTG1, MMP14, EIF5A2, PPAP2B, CDC25B, GLI1, SREBF2	5.36456	0.036577	0.428476
	GO:0007276~gamete generation	8	0.000412803	AFP, GMCL1, PTTG1, EIF5A2, PPAP2B, CDC25B, GLI1, SREBF2	5.90895	0.0480444	0.646337
	GO:0010033~response to organic substance	11	0.000556734	AFP, FOS, SDC1, FADS1, PPP2CA, FOXO1, MMP14, EIF2AK3, HSPA8, F2R, SREBF2	3.84678	0.0573218	0.870774
	GO:0045449~regulation of transcription	25	0.00173875	ZNF281, PTPRK, ZNFX1, FADS1, HMBOX1, FOXO1, TCEAL8, ARNTL, SOX6, GRAMD4, SREBF2, GLI1, TSC22D1, FOS, GMCL1, CRY2, NCOA2, NR1D1, PPP2CA, PER2, TEF, PER3, CRY1, NFIL3, F2R	1.92151	0.152972	2.69605
	GO:0006470~protein amino acid dephosphorylation	6	0.00175471	PTPRK, DUSP3, NCEH1, SSH1, PPP2CA, CDC25B	6.92714	0.141282	2.72048
	GO:0010604~positive regulation of macromolecule metabolic process	12	0.00183331	FOS, PSMB4, NCOA2, PLK1, FOXO1, CDC20, SOX6, ARNTL, EIF5A2, F2R, GLI1, SREBF2	3.04552	0.13574	2.84071
RNA and RPF Cyclers (RNA - BHQ < 0.05; RPF - BHQ < 0.15)
	Term	Count	PValue	Genes	Fold Enrichment	Benjamini	FDR
	GO:0048511~rhythmic process	10	1.48137e-10	AFP, CRY2, NR1D1, TEF, PER2, ARNTL, PER3, MMP14, NFIL3, CRY1	26.6248	1.12288e-07	2.25779e-07
	GO:0007623~circadian rhythm	6	2.82271e-07	CRY2, NR1D1, PER2, ARNTL, PER3, CRY1	43.3342	0.000106975	0.000430216
	GO:0044093~positive regulation of molecular function	8	0.00146174	PSMB4, PLCE1, UACA, PLK1, CDC20, CALM2, CDC25B, F2R	4.71554	0.308992	2.20484
	GO:0048609~reproductive process in a multicellular organism	7	0.00197229	AFP, GMCL1, PTTG1, MMP14, PPAP2B, CDC25B, SREBF2	5.3121	0.312104	2.96416
	GO:0032504~multicellular organism reproduction	7	0.00198421	AFP, GMCL1, PTTG1, MMP14, PPAP2B, CDC25B, SREBF2	5.30569	0.26	2.98184
	GO:0043085~positive regulation of catalytic activity	7	0.00339008	PSMB4, PLCE1, UACA, PLK1, CDC20, CDC25B, F2R	4.76019	0.348845	5.04403
	GO:0006636~unsaturated fatty acid biosynthetic process	3	0.00407067	PTGIS, FADS1, FADS2	31.4173	0.357054	6.02757
	GO:0007276~gamete generation	6	0.00413342	AFP, GMCL1, PTTG1, PPAP2B, CDC25B, SREBF2	5.63539	0.324602	6.11777
	GO:0017038~protein import	5	0.00460146	CRY2, PRICKLE1, TIMM10, ARNTL, F2R	7.3923	0.321886	6.78802
	GO:0019953~sexual reproduction	6	0.00732556	AFP, GMCL1, PTTG1, PPAP2B, CDC25B, SREBF2	4.90895	0.427259	10.6011
	GO:0006633~fatty acid biosynthetic process	4	0.00810611	PTGIS, FADS1, SCD, FADS2	9.66686	0.429282	11.6665
	GO:0006606~protein import into nucleus	4	0.0085369	CRY2, PRICKLE1, ARNTL, F2R	9.48446	0.418162	12.2494
RNA and RPF Cyclers (RNA - BHQ < 0.05; RPF - BHQ < 0.1)
	Term	Count	PValue	Genes	Fold Enrichment	Benjamini	FDR
	GO:0048511~rhythmic process	9	1.1976e-10	AFP, CRY2, NR1D1, TEF, PER2, ARNTL, PER3, NFIL3, CRY1	36.6217	5.52093e-08	1.70489e-07
	GO:0007623~circadian rhythm	6	3.16846e-08	CRY2, NR1D1, PER2, ARNTL, PER3, CRY1	66.2277	7.30327e-06	4.51059e-05
	GO:0006350~transcription	12	0.00490955	TSC22D1, ZNF281, CRY2, NR1D1, TEF, PER2, SOX6, ARNTL, PER3, NFIL3, CRY1, SREBF2	2.57454	0.530597	6.7666
	GO:0051437~positive regulation of ubiquitin-protein ligase activity during mitotic cell cycle	3	0.00698752	PSMB4, PLK1, CDC20	23.614	0.554313	9.50024
	GO:0051443~positive regulation of ubiquitin-protein ligase activity	3	0.00789685	PSMB4, PLK1, CDC20	22.1608	0.518563	10.6729
	GO:0051439~regulation of ubiquitin-protein ligase activity during mitotic cell cycle	3	0.00801408	PSMB4, PLK1, CDC20	21.9916	0.461102	10.823
	GO:0051351~positive regulation of ligase activity	3	0.00885655	PSMB4, PLK1, CDC20	20.8761	0.443376	11.8952
	GO:0017038~protein import	4	0.00944107	CRY2, PRICKLE1, TIMM10, ARNTL	9.03814	0.4211	12.632
	GO:0051438~regulation of ubiquitin-protein ligase activity	3	0.0106547	PSMB4, PLK1, CDC20	18.9533	0.422291	14.1435
	GO:0045449~regulation of transcription	14	0.0110326	ZNF281, FADS1, ARNTL, SOX6, SREBF2, TSC22D1, CRY2, GMCL1, NR1D1, TEF, PER2, PER3, CRY1, NFIL3	2.09118	0.400363	14.6093
	GO:0051340~regulation of ligase activity	3	0.0117486	PSMB4, PLK1, CDC20	18.0057	0.390604	15.4851
	GO:0031398~positive regulation of protein ubiquitination	3	0.0118886	PSMB4, PLK1, CDC20	17.8938	0.368375	15.6554
RNA cyclers phase-shifted by the siARNTL treatment
	Term	Count	PValue	Genes	Fold Enrichment	Benjamini	FDR
	GO:0022403~cell cycle phase	7	6.88916e-05	PLK1, CKS2, CDC20, PTTG1, CDKN3, ITGB1, CDC25B	9.32112	0.032395	0.0985338
	GO:0051726~regulation of cell cycle	6	0.000112585	MAD2L1BP, BTG3, CKS2, CDKN3, ITGB1, HSPA8	11.8583	0.0265504	0.16098
	GO:0022402~cell cycle process	7	0.000282563	PLK1, CKS2, CDC20, PTTG1, CDKN3, ITGB1, CDC25B	7.19276	0.0440294	0.403568
	GO:0007049~cell cycle	8	0.000307382	PLK1, CKS2, CDC20, PTTG1, CDKN3, ITGB1, CALM2, CDC25B	5.66826	0.0360711	0.438943
	GO:0000278~mitotic cell cycle	6	0.000474857	PLK1, CDC20, PTTG1, CDKN3, ITGB1, CDC25B	8.68113	0.0443917	0.677344
	GO:0044093~positive regulation of molecular function	5	0.00262479	UACA, PLK1, CDC20, CALM2, CDC25B	8.23187	0.188916	3.69098
	GO:0000279~M phase	5	0.00294822	PLK1, CKS2, CDC20, PTTG1, CDC25B	7.97018	0.182594	4.13692
	GO:0051301~cell division	5	0.00332937	PLK1, CKS2, CDC20, PTTG1, CDC25B	7.70428	0.180664	4.65996
	GO:0007166~cell surface receptor linked signal transduction	6	0.00650266	CD97, FOS, ITGB1, CALM2, NMU, PLEKHA1	4.77344	0.292835	8.91275
	GO:0007126~meiosis	3	0.00809584	PLK1, CKS2, CDC25B	21.4029	0.321965	10.9807
	GO:0051327~M phase of meiotic cell cycle	3	0.00809584	PLK1, CKS2, CDC25B	21.4029	0.321965	10.9807
	GO:0051321~meiotic cell cycle	3	0.00867386	PLK1, CKS2, CDC25B	20.6475	0.315155	11.7201
RPF cyclers phase-shifted by the siARNTL treatment
	Term	Count	PValue	Genes	Fold Enrichment	Benjamini	FDR
	GO:0006414~translational elongation	3	0.00312667	RPL8, RPL3, EEF2	33.4842	0.550019	3.99874
	GO:0043085~positive regulation of catalytic activity	3	0.0295621	UACA, CDC20, CDC25B	10.3279	0.978203	32.365
	GO:0044093~positive regulation of molecular function	3	0.0384187	UACA, CDC20, CDC25B	8.95216	0.964206	39.9817
	GO:0009416~response to light stimulus	2	0.0897423	UACA, MAT2A	20.0063	0.997507	70.6334
Cycling genes phase-shifted by the siARNTL treatment
	Term	Count	PValue	Genes	Fold Enrichment	Benjamini	FDR
	GO:0022403~cell cycle phase	7	0.000538736	PLK1, CKS2, CDC20, PTTG1, CDKN3, ITGB1, CDC25B	6.59299	0.2577	0.78391
	GO:0007049~cell cycle	9	0.000591921	PLK1, DTYMK, CKS2, CDC20, PTTG1, CDKN3, ITGB1, CALM2, CDC25B	4.51041	0.151016	0.860988
	GO:0051726~regulation of cell cycle	6	0.000634245	MAD2L1BP, BTG3, CKS2, CDKN3, ITGB1, HSPA8	8.38761	0.11037	0.922286
	GO:0009416~response to light stimulus	4	0.0020116	FOS, UACA, MAT2A, NMU	15.6147	0.242994	2.89794
	GO:0022402~cell cycle process	7	0.00204348	PLK1, CKS2, CDC20, PTTG1, CDKN3, ITGB1, CDC25B	5.08756	0.202473	2.94323
	GO:0000278~mitotic cell cycle	6	0.00251181	PLK1, CDC20, PTTG1, CDKN3, ITGB1, CDC25B	6.14031	0.206893	3.60631
	GO:0009314~response to radiation	4	0.00762795	FOS, UACA, MAT2A, NMU	9.67927	0.453881	10.5802
	GO:0006952~defense response	4	0.00930947	CD97, FOS, CLIC1, ITGB1	8.9954	0.47614	12.7677
	GO:0044093~positive regulation of molecular function	5	0.00961473	UACA, PLK1, CDC20, CALM2, CDC25B	5.82254	0.447681	13.1594
	GO:0000279~M phase	5	0.0107305	PLK1, CKS2, CDC20, PTTG1, CDC25B	5.63745	0.449322	14.5773
	GO:0051301~cell division	5	0.0120339	PLK1, CKS2, CDC20, PTTG1, CDC25B	5.44937	0.455913	16.2063
	GO:0007126~meiosis	3	0.0160837	PLK1, CKS2, CDC25B	15.1386	0.526317	21.0852
