# Supplementary material for: Ribosome profiling reveals an important role for translational control in circadian gene expression
Source: HighWire-hosted journal article supplement (doi:10.1101/gr.191296.115), 2015-09-03
Supplement: Supplemental_Table_S7.xlsx [file Supplemental_Table_S7.xlsx]

## Sheet: Table_S7
Supplementary Table S7: Oscillations in Translational Efficiency.
Genes that oscillate in the translational efficiency (TE) data with a statistical cutoff of ADJP < 0.01. Gene symbol, JTK cycling statistics, circadian period, peak phase (LAG), amplitude, and TE values for both replicates are indicated. This table lists information from both the wild-type and siARNTL (labeled as KD) datasets.
Gene_Symbol	WT.FDR	WT.ADJP	WT.PER	WT.LAG	WT.AMP	KD.FDR	KD.ADJP	KD.PER	KD.LAG	KD.AMP	WT.CT00_rep1	WT.CT00_rep2	WT.CT02_rep1	WT.CT02_rep2	WT.CT04_rep1	WT.CT04_rep2	WT.CT06_rep1	WT.CT06_rep2	WT.CT08_rep1	WT.CT08_rep2	WT.CT10_rep1	WT.CT10_rep2	WT.CT12_rep1	WT.CT12_rep2	WT.CT14_rep1	WT.CT14_rep2	WT.CT16_rep1	WT.CT16_rep2	WT.CT18_rep1	WT.CT18_rep2	WT.CT20_rep1	WT.CT20_rep2	WT.CT22_rep1	WT.CT22_rep2	KD.CT00_rep1	KD.CT00_rep2	KD.CT02_rep1	KD.CT02_rep2	KD.CT04_rep1	KD.CT04_rep2	KD.CT06_rep1	KD.CT06_rep2	KD.CT08_rep1	KD.CT08_rep2	KD.CT10_rep1	KD.CT10_rep2	KD.CT12_rep1	KD.CT12_rep2	KD.CT14_rep1
SNRNP70	0.00786111	7.90697e-07	24	4.5	0.247183	1	1	24	5.5	0.0190435	3.22728	3.61544	3.32612	4.10597	3.70363	3.50003	3.41148	3.57449	3.53868	3.37539	3.36886	3.43599	3.21376	3.0468	2.94257	2.99738	2.96841	2.7274	3.15834	3.07416	3.14748	3.13576	3.27439	3.27028	3.74156	4.61105	3.81298	3.89696	4.05869	3.47849	4.06373	3.76978	4.39439	3.84716	4.46326	3.60794	3.87095	3.95582	3.36684
PGAP1	0.28102	5.65319e-05	24	20	0.37948	1	0.267231	24	13	0.215383	2.92682	2.85026	2.9497	1.70878	2.28062	2.23506	2.31725	2.39822	2.03369	2.36051	2.08964	2.45537	2.54786	2.90993	2.80188	2.58258	2.94708	2.96243	3.23827	2.99203	3.09746	3.23102	2.73257	2.68571	3.65657	3.31258	3.70337	3.47752	4.03151	3.98333	3.65965	4.81495	3.05062	4.96703	3.16933	4.77527	4.20564	4.58118	3.67523
UBAP2	0.460162	0.000185139	24	5	0.354316	1	0.825244	24	7	0.0799798	3.11645	3.2267	2.72382	3.35366	3.47613	3.21609	3.09853	2.67188	2.87014	3.01715	2.80896	2.90027	2.53377	2.96918	2.61578	2.44142	2.15754	2.19268	2.57639	2.38586	2.35657	2.96177	2.51607	2.67623	2.77086	2.72047	2.69287	2.64192	2.81789	2.95576	2.75873	3.1781	2.96472	3.37434	3.08219	2.32956	2.85407	2.70738	2.62014
TMEM258	0.788522	0.00055099	24	6	0.160169	1	1	24	14.5	0.0899522	2.74246	3.27026	2.60711	2.76024	2.85766	2.69913	3.1429	3.07187	2.70457	2.97047	2.87471	2.7457	2.73336	2.62831	2.3615	2.4947	2.54959	2.57094	2.25478	2.60605	2.64294	2.52384	2.51906	2.64791	2.31219	2.55675	2.17558	2.73381	2.14756	2.7731	2.46671	2.16282	2.30025	2.25087	2.10435	2.4115	2.27129	2.45998	2.0957
VIM	0.788522	0.00071381	24	4.5	0.683617	1	1	24	14.5	0.041706	6.13931	6.78083	5.54883	6.77793	6.33608	6.05574	5.45456	5.88764	5.7552	5.68815	5.26983	5.78425	5.65922	5.77363	4.65231	4.68307	4.84418	4.79683	4.6547	4.99489	4.59009	5.04786	5.09224	5.0356	5.11355	5.12287	4.86928	5.49369	4.93508	4.60959	4.90994	4.88012	5.22831	5.0789	4.84742	4.65778	5.01373	5.07618	4.97483
PLP2	0.788522	0.00071381	24	7.5	0.456621	1	0.150471	24	6	0.526155	5.98523	7.06913	5.69505	6.49093	7.14669	6.62279	6.8976	6.06207	7.1465	6.93073	6.41213	6.5603	5.97942	6.04194	5.32078	5.86674	5.97029	5.93086	5.80259	5.64467	5.45871	5.4622	6.38543	5.73674	5.58694	7.14602	5.98416	6.80819	5.67069	6.45837	6.32088	7.35525	6.29101	6.74236	6.2372	6.57688	5.83052	6.33925	5.71427
ACOX1	0.831452	0.000919932	24	3	0.173469	1	1	24	12.5	0.01813	4.73223	4.66586	4.76162	5.18853	4.89711	4.72516	4.61586	4.77535	4.23535	4.40456	4.48194	4.37262	4.42845	4.24	4.13624	4.29534	4.16509	4.54059	4.40459	4.47504	4.5622	4.7974	3.8276	4.59477	4.70596	5.17897	5.04712	4.97456	4.66729	5.11255	4.57858	4.69954	4.72305	4.5824	4.29914	4.84016	4.41406	4.56305	4.93607
C22orf29	0.902089	0.00117956	24	4	0.538417	1	0.580561	24	6.5	0.321388	4.27243	4.53631	3.76859	4.73162	4.06593	5.41354	4.01189	4.48305	4.32334	4.07991	4.15855	4.07193	3.54674	3.60506	3.27912	3.6001	3.10864	3.71133	3.21891	3.18546	4.19583	3.9332	3.86425	4.87727	4.39485	4.93498	4.8085	4.33775	4.41167	4.33731	4.89431	4.77271	4.67432	5.51246	4.76711	4.52309	4.30525	4.89509	3.72436
AATF	0.902089	0.00117956	24	5.5	0.0976788	1	0.306247	24	5	0.106917	1.70072	1.8129	1.79591	1.93066	1.87419	2.08493	1.8598	1.8424	1.86732	1.8414	1.83533	1.84351	1.80738	1.66747	1.56419	1.69332	1.72174	1.70544	1.68282	1.79641	1.63618	1.73531	1.59775	1.72918	2.28932	1.90839	1.9968	2.05572	2.13893	2.25832	2.1819	2.13089	2.17304	2.13059	2.0302	1.98076	2.05091	1.89224	2.07268
ZNF438	0.974162	0.00191087	24	16	0.174378	1	0.306247	24	13	0.0636033	0.64789	0.812481	0.989543	0.521157	0.784681	0.777878	0.96401	0.708617	0.865517	1.16724	1.05642	0.943446	1.60687	0.984538	1.11527	1.19095	1.23441	1.38676	1.11212	0.954748	0.963236	1.02134	1.24486	0.958746	1.10959	0.645777	0.699919	0.616498	1.02219	0.821683	0.868777	0.768339	1.10516	0.800882	0.911631	0.86483	1.2583	1.51526	0.888684
RABL3	0.974162	0.00241479	24	15	0.781037	1	1	24	12.5	0.0440557	4.59828	6.65952	7.14501	5.47857	6.4276	6.46856	7.17595	6.66252	5.86296	6.89787	7.10888	6.75675	8.11937	7.30301	7.49299	8.12316	9.20369	7.76562	6.79358	8.25681	7.76802	6.41806	5.79587	5.64996	10.666	5.15085	8.86224	6.11332	7.48857	7.79374	9.65495	7.40795	6.50796	6.64802	9.34318	8.86595	6.85104	6.82202	7.62238
ZNF140	0.974162	0.00241479	24	20.5	0.185345	1	1	24	16.5	0.0229857	1.20211	0.952496	0.874371	0.393269	0.703861	0.733819	0.885976	0.851146	0.700973	0.825117	0.668791	0.731654	0.795938	0.729672	0.790753	0.916108	0.888038	1.05944	1.17713	1.0326	1.21496	1.17756	1.051	0.771577	0.986224	0.572626	0.870224	0.698981	1.04278	1.04116	0.875257	0.795639	0.767856	0.829236	1.00115	0.868067	0.885475	0.960088	1.08192
A1BG	0.974162	0.00241479	24	15	0.180201	1	0.398806	24	15	0.0813913	0.709348	0.541536	0.611899	0.723293	0.809638	0.764591	0.73314	0.88291	0.881861	0.8333	1.11574	0.749441	0.926342	1.55318	1.18082	0.82765	1.01943	1.11705	1.06092	1.12816	0.991763	0.731545	1.03895	0.95868	0.259885	0.649406	0.297622	0.421952	0.344454	0.444173	0.275964	0.449216	0.630137	0.626157	0.641246	0.554951	0.335682	0.596356	0.671214
GRAMD1A	0.974162	0.00241479	24	6	0.132659	1	1	24	6.5	0.0622092	1.70803	1.92257	1.60002	2.1143	1.72181	1.71549	1.71683	1.92228	1.49298	1.66348	1.73075	1.57697	1.72936	1.56488	1.54167	1.65611	1.52121	1.26919	1.45722	1.50797	1.47096	1.58748	1.56136	1.49192	1.80704	2.18183	1.62314	2.24451	1.25856	1.55642	1.63082	1.89827	2.00487	1.98686	1.81758	2.00265	1.75964	1.68159	1.60605
MARC1	0.974162	0.00303752	24	1.5	0.280607	1	1	24	7.5	0	2.00718	1.95355	1.74605	1.87857	1.88137	1.68984	1.45393	1.91325	1.58117	1.64192	1.4563	1.85084	1.35484	1.20883	1.2894	1.39065	1.27671	1.77382	1.38133	1.78571	1.85314	1.62219	1.62066	1.63407	1.45468	2.12258	2.00899	1.89043	1.69467	1.95754	1.70058	1.70479	1.81349	1.70705	1.3394	1.86491	2.02703	1.86695	1.01859
CDC25B	0.974162	0.00303752	24	5	0.246228	0.701584	0.0134079	24	8	0.414149	3.90921	4.22148	4.59384	4.57343	4.62839	4.05841	4.42271	3.88868	4.35877	4.16433	4.1733	3.97004	3.81611	4.03397	3.92748	3.19649	3.87548	3.56628	4.71977	3.57044	3.87931	3.75118	3.95604	3.88036	3.41426	3.39209	3.61328	3.66029	3.40249	4.21764	4.01079	4.26685	3.21569	4.14214	3.62771	3.73066	3.67179	4.67275	3.27655
EXOSC2	0.974162	0.00303752	24	5	0.149346	1	1	24	5.5	0.0469314	2.20349	2.15258	2.48965	2.56729	2.42824	2.24763	2.28218	2.26368	2.36859	2.44346	2.21419	2.20807	1.88537	2.15086	2.09067	2.31859	1.97832	1.93847	1.90045	2.0354	2.32054	2.08222	2.12039	2.28859	2.46278	2.39605	2.26236	2.63037	2.56047	2.5579	2.48553	2.473	2.71341	2.13317	2.22715	2.40932	2.19956	2.18252	2.44
NELL2	0.974162	0.00303752	24	13	0.0812709	1	1	24	15.5	0.00648488	0.531047	0.792054	0.851434	0.464197	0.73964	0.880063	0.872784	0.895673	0.915612	0.722825	0.979681	0.999078	0.861167	1.10855	1.0482	1.0767	0.758863	0.961858	0.674436	0.935376	0.851272	1.03569	0.86327	0.720863	0.965187	0.727624	0.851946	0.748745	0.911242	0.948385	1.06822	0.667127	0.955957	0.814595	0.832624	1.00709	0.846306	0.84379	0.972056
GAPDH	0.974162	0.00303752	24	5.5	0.0425544	1	0.0684872	24	1.5	0.0322098	0.611701	0.698323	0.557846	0.663598	0.722836	0.627975	0.652211	0.589061	0.711355	0.603083	0.677272	0.583485	0.58365	0.63829	0.55082	0.537153	0.554994	0.568041	0.569825	0.543145	0.55196	0.54101	0.579422	0.573127	0.634641	0.747468	0.583289	0.690746	0.641182	0.67891	0.617455	0.648033	0.590871	0.602481	0.585599	0.5839	0.59931	0.635234	0.594549
CNIH	1	0.00380362	24	6	0.325835	1	0.398806	24	2.5	0.155691	5.77071	5.89614	6.11224	7.4381	6.20127	6.26176	5.82029	6.36241	6.0661	5.83035	5.95864	6.07505	5.54278	6.15495	5.46451	5.67943	5.70814	5.98969	4.36939	5.56118	5.23743	5.56902	4.59862	5.91853	5.96131	5.64536	6.35763	6.13518	5.85371	6.38912	5.62254	5.74671	5.66743	6.00343	5.35903	6.288	5.10649	5.56894	5.87154
RPL13	1	0.00380362	24	5	0.224848	0.941425	0.0488609	24	23	0.0225271	1.97638	2.05013	1.47317	2.19948	1.68595	1.78527	1.48094	1.61954	1.44009	1.70981	1.5143	1.66562	1.50123	1.71067	1.3159	1.34703	1.27528	1.32023	1.20275	1.33309	1.20339	1.38915	1.12216	1.44517	1.49471	1.61164	1.04965	1.43385	1.22654	1.0897	1.24887	1.25844	1.35711	1.21888	1.09685	1.10431	1.09287	1.17648	1.16898
MAT2A	1	0.00380362	24	5	0.160411	1	1	24	8.5	0.0452508	3.33756	3.63524	3.48147	4.172	3.91848	4.01927	3.20735	3.89172	3.33395	3.81852	3.25686	3.65234	3.25319	3.52267	3.15719	3.23331	3.52691	3.16745	3.10858	3.22659	3.22395	3.31934	3.48531	3.33984	4.0087	4.0155	4.52646	4.59463	4.42175	4.43389	4.19557	3.90597	4.69108	4.76296	4.59158	4.93074	4.13605	4.3423	4.39238
ACAD9	1	0.00380362	24	6	0.154617	1	1	24	12.5	0.0283161	1.94463	1.84991	2.01931	1.96003	1.99476	2.21018	1.92122	1.78884	1.98924	2.15505	2.07056	1.96826	1.85403	1.77451	1.7496	1.73635	1.85269	1.74468	1.52622	1.66536	2.19391	1.74428	1.84739	1.86645	2.05677	2.12673	2.04997	2.09876	1.8999	2.2231	1.82563	1.967	1.93707	1.58691	1.95239	1.94254	2.09618	1.78293	1.97352
UBA52	1	0.00588624	24	7	0.70952	1	0.110879	24	0	0.473805	7.20092	7.85461	6.03935	7.67922	7.97871	7.19163	7.33483	7.08932	7.54879	6.9444	7.72868	6.74161	6.81761	7.12439	6.33141	6.16415	6.57509	6.93608	6.04623	5.8904	5.94478	6.10767	6.27003	6.09991	6.13209	7.75521	6.0211	6.66619	6.37133	6.6862	5.8941	6.12551	5.82112	5.64061	5.05594	5.39191	5.4797	6.21301	5.53146
BIN1	1	0.00588624	24	5	0.123656	1	1	24	9.5	0.0164004	1.56594	1.47248	1.43837	1.55263	1.72374	1.56656	1.31938	1.41506	1.63911	1.30798	1.35393	1.51366	1.29985	1.34327	1.3073	1.39608	1.30969	1.19516	1.19562	1.38205	1.2248	1.2142	1.51958	1.25012	1.54545	1.61855	1.55253	1.45966	1.39446	1.4447	1.70635	1.52861	1.25408	1.37162	1.56175	1.2665	1.51574	1.54779	1.334
CCDC134	1	0.00727581	24	4.5	0.277379	1	0.306247	24	10	0.220879	3.23795	2.90587	2.86521	4.02004	3.14856	3.15717	3.36467	2.92234	3.0123	2.67905	3.11271	3.16846	2.58466	2.65637	2.51446	2.76585	2.18392	2.90243	2.59569	2.50222	2.98439	2.80682	2.5498	2.5418	3.01026	2.96518	3.5698	3.88121	3.1356	2.8134	3.38576	3.25616	3.14857	3.54394	3.44195	3.49929	3.4016	3.20598	4.01597
SOD2	1	0.00727581	24	7	0.250732	1	0.825244	24	2	0.0316087	3.95709	4.32806	4.11232	4.65034	4.07434	4.65261	4.36168	4.15299	4.17771	3.6735	4.13812	4.02777	3.87425	4.16174	3.68022	3.66724	4.17676	3.90291	3.58793	3.47062	3.42326	3.79453	3.50038	3.61587	4.16615	4.31885	4.43352	4.7363	4.07625	4.20925	4.60328	4.29795	4.42045	4.38807	4.01668	4.3079	3.94381	4.25325	4.03059
TBCEL	1	0.00727581	24	7	0.226477	1	0.825244	24	6	0.149582	1.89164	1.42018	2.19915	1.24005	1.64347	1.74937	2.19324	1.95097	1.9338	1.69596	1.73627	1.62398	1.5771	2.06771	1.38038	1.78725	1.68227	1.60833	1.33805	1.25487	1.57454	1.35888	1.31506	1.42908	1.86386	1.60542	1.86087	1.48549	2.31459	2.35746	2.06756	2.72177	1.87151	1.75525	1.79456	2.52454	1.51228	1.35181	1.51411
GNB2L1	1	0.00727581	24	6	0.208471	0.701584	0.0134079	24	0	0.0909286	1.31889	1.5944	1.02197	1.53581	1.22545	1.36754	1.12658	1.31944	1.1175	1.2287	1.09675	1.2305	1.0572	1.15988	0.885315	1.05842	0.939165	1.06258	0.808811	0.98623	0.858303	0.990285	0.845746	0.925175	1.27779	1.33816	1.20338	1.47165	1.22824	1.2397	1.17758	1.20553	1.26274	1.16172	1.05919	1.12363	1.10236	1.07789	1.14879
NANS	1	0.00727581	24	11	0.109719	0.901142	0.0410599	24	1	0.0381067	2.13494	1.84845	1.94973	1.77805	1.96207	1.97407	1.89042	1.93673	2.18348	1.95261	2.05142	2.25638	2.15694	2.09284	1.98722	2.00295	1.98311	2.12889	1.88452	1.89626	1.87945	1.86706	1.84727	2.06777	2.31177	2.28151	2.14599	2.1814	2.13265	2.03492	2.19368	1.95434	2.00085	2.20818	2.11179	2.13764	2.12278	1.91396	2.08674
RBPMS	1	0.00895623	24	14.5	5.5367	1	0.349965	24	2	5.17948	12.5569	26.12	13.8964	14.3262	20.8962	15.3279	14.1517	15.2881	25.064	21.4218	21.5211	12.2676	28.5447	33.4895	22.552	35.343	20.5119	21.868	32.8961	30.0439	15.792	21.405	18.1274	17.7856	14.6817	25.6922	23.6227	25.8313	14.9328	23.3483	26.6697	19.1762	15.7159	23.6081	22.0302	15.5408	14.5815	15.9251	13.0171
RPS23	1	0.00895623	24	6	1.04469	1	0.923131	24	19	0.2416	8.2769	7.69142	6.24574	7.89723	6.35352	6.90767	6.54816	7.18709	5.98769	6.86556	5.48602	6.89278	6.40847	5.81735	5.18134	5.49184	5.1904	5.86147	4.65933	5.45538	4.87847	5.4358	5.08627	4.82362	4.76425	4.01192	4.58993	5.00761	4.7528	4.06858	4.38924	4.14607	5.11411	4.10231	3.962	4.43052	4.33903	3.87421	4.70736
SLC25A22	1	0.00895623	24	1	0.853784	1	1	24	8.5	0.000736405	7.33793	5.6474	4.40515	5.98091	5.7083	5.19686	5.56923	4.13927	5.76667	3.85855	4.96466	3.54437	3.89672	4.21715	3.98942	4.25667	2.99895	4.35326	4.8423	4.29108	5.6684	4.87846	5.87977	3.9973	4.68108	6.32183	4.37161	4.76906	3.88136	3.20303	4.9769	5.01755	5.61825	4.78963	5.64471	5.48602	4.68733	5.20006	3.9576
ALG13	1	0.00895623	24	17	0.261936	1	0.129367	24	19	0.05889	2.51644	2.30102	1.6508	2.28757	2.07111	2.024	2.88355	2.35949	2.24664	1.88315	2.15726	2.41321	2.43067	2.67325	3.26144	2.11335	3.49547	2.69579	2.34946	2.85254	2.57347	2.67793	2.61707	2.53023	2.62463	2.50018	2.74626	2.06221	2.66559	2.58286	2.38036	1.95373	2.42223	2.54135	2.44081	2.69702	1.58483	2.65893	3.28566
SNRPA	1	0.00895623	24	6.5	0.221729	1	1	24	15.5	0.0365784	3.58345	3.73579	3.82985	3.62925	3.82378	3.63792	3.52229	3.29566	3.80533	3.66872	3.75009	3.55842	3.62303	3.43592	3.55898	3.19386	3.47795	3.29233	3.38868	3.09486	3.26403	3.17727	3.266	3.20355	3.69699	4.92063	3.51131	3.70648	3.68635	3.63297	3.62276	3.7147	4.00589	4.00896	3.46425	3.75084	3.73608	3.83945	3.88984
WSB1	1	0.00895623	24	6	0.161059	1	1	24	6.5	0.00825806	1.28055	1.23432	1.48101	1.6465	1.27479	1.30382	1.15016	1.61005	0.875716	1.11636	1.21257	1.36656	1.03411	1.00655	1.14346	1.13548	0.954635	1.07245	0.793063	1.04245	0.966319	1.0259	0.999083	1.09085	1.40868	1.16386	1.39234	1.49228	1.35765	1.51508	1.43058	1.29138	1.46047	1.42058	1.31871	1.52627	1.26687	1.36391	1.38135
C14orf37	1	0.00895623	24	20	0.147083	1	1	24	15.5	0.0482875	1.59817	1.34615	1.6908	1.3774	1.28287	1.46753	1.49296	1.40402	1.3156	1.21783	1.41204	1.62007	1.76892	1.11895	1.54039	1.37431	1.49773	1.78682	1.62325	1.66825	1.8278	1.78721	1.62287	1.54705	1.67312	1.59163	1.78494	1.53844	1.69553	1.89999	1.58798	1.82635	1.57843	1.64908	1.55891	1.80066	1.7788	1.99246	1.64501
MYO7A	1	0.00895623	24	13	0.110936	1	1	24	14.5	0.0397534	1.05198	1.02439	1.09779	0.928308	1.34041	1.30391	1.3742	1.39275	1.60881	1.26086	1.65772	1.33243	2.00329	1.47764	1.45735	1.37441	1.90416	1.22369	2.01834	1.32208	2.13372	1.31961	1.33447	1.18174	1.88565	1.75569	1.40157	1.36306	1.24754	1.47756	1.59975	1.44512	1.24863	1.21989	1.55927	1.45273	2.31523	1.43586	1.28428
KIF3C	1	0.00895623	24	15.5	0.0982083	1	1	24	13.5	0	0.73802	0.796488	0.580274	0.469658	0.657239	0.65582	0.484191	0.653309	1.02702	0.696459	0.931663	0.696799	0.727375	0.817059	0.831655	0.889322	0.968048	0.796127	0.901563	0.715385	0.710971	0.721972	0.79721	0.770626	0.712657	0.67697	0.810495	0.846506	0.865807	0.903572	0.658879	0.696171	0.827841	0.763411	0.94139	0.825429	0.759411	0.887342	0.862991
TUBA4A	1	0.00895623	24	5	0.0954831	1	0.0806795	24	4.5	0.136509	1.90236	2.4502	1.89836	2.26598	2.51196	2.39687	2.28487	2.30699	2.41025	2.22851	2.16055	2.30485	2.12322	2.21107	2.06579	2.08406	2.06358	2.18462	2.12107	2.12313	2.12416	2.09892	2.1704	2.25769	2.58665	2.27849	2.38866	2.37441	2.173	2.49656	2.3069	2.42986	2.42859	2.19161	2.43597	2.25238	2.33062	2.15069	2.2235
[truncated: 9 more columns]
