# Supplementary material for: Ribosome profiling reveals an important role for translational control in circadian gene expression
Source: HighWire-hosted journal article supplement (doi:10.1101/gr.191296.115), 2015-09-03
Supplement: Supplemental_Table_S8.xlsx [file Supplemental_Table_S8.xlsx]

## Sheet: Table S8
Supplementary Table S8: Expressed uORFs in RNA and RPF oscillators.
Annotation data for uORFs expressed in genes that oscillate in the RNA or RPF data. Gene symbol, start coordinate of the uORF relative to the transcriptional start site, nucleotide length of uORF, number of nucleotides between the end of the uORF and the start of the CDS, indicator column for whether or not uORF is in frame with the main CDS, JTK cycling statistics, circadian period, peak phase (…
Gene_Symbol	ORF_start	ORF_length	Dist_from_CDS_start	In.frame_w_CDS?	WT.FDR	WT.ADJP	WT.PER	WT.LAG	WT.AMP	KD.FDR	KD.ADJP	KD.PER	KD.LAG	KD.AMP	ORF_seq
TCF12	48	192	55	Y	0.570543	0.000919932	24	18.5	16.7762	1	0.232515	24	16	6.00407	ATGTCCGCCTGAAGAGACCCACAAGTTCTATTCGGGGGGACCGACAGCCCGCCCCGGGAGGAAGGGGCGGCCAGGCCCGAAAGCCGCCTCCCCCTCCCAGACCCGAGAGCTCGTGCGGGGCAAAGTGAACCGAGCCGCTGGGCGGTGCAAGGGGAAGCCCAAGCCCGTTCTCCCGGCCAAAGTGAACTTTAA
H2AFY2	5	267	188	N	0.570543	0.00191087	24	14	8.04324	1	1	24	16.5	1.38021	ATGTTAGCGAGTGGCCCTCGGCTCGTCTCGCAGATCGGCCAAGTACGCGGAGGCCGCGCGGTTTCACCATTAATACTCCTGAAGGACAATAGCTCATCAAGCCCCACCGAAAGCCCCGGACCCGTCGCGGAGCCTGGGCTGGCGGGGGATGAGGCTGAGCAACTCCTCCTAGAGGTGGTTATGTGGAGAAGGAGCAATCCCTTCTCCCTCCTCCTCCTCCCCCCGCTACTATCCGCGGCCCAGAGAACTGCCGCTTGCCGCCATTGA
SLC38A2	291	33	117	Y	0.570543	0.00380362	24	16	23.0462	1	1	24	16.5	1.69829	ATGATTTGTATTTGACTGAGAGAAACCCACTGA
LRRN1	520	183	59	Y	0.570543	0.00380362	24	17	14.6201	0.288892	0.00727581	24	17	6.9091	ATGCCACGGACCTGTGCACATGCCTGGAATTGAGAGACACAGTTAAAAGACTCCAAGTTGCTTTCTGCCTTTTGAAAACTCCTGAAAACCATCCCTTTGGACTCTGGAATTCTACACAGCTCAACCAAGACTTTGCTTGAATGTTTACATTTTCTGCTCGCTGTCCTACATATCACAATATAG
AVPI1	301	111	92	N	0.570543	0.00380362	24	7	8.76061	1	1	24	14.5	1.75183	ATGTCGCCTTAGGACCTCGGCCAGGATACCCTCTGCCATGCTCTTGTGCTGCCCGTGATCACCGACTGGCCCTTGTAAGCACCTTCGCAGAGCTGCGCCTGCCCTTTCTGA
TMEM19	451	96	37	Y	0.570543	0.00380362	24	4	8.26133	1	1	24	8.5	0.73398	ATGCTTGTTTGGTCGGTGGAATATGTTGGGATTTATGTTTGCCTCTGAACAAGTGTCTTGCTCACATCGTAAATGACTTTCTCTCCGAAACGCTAA
TRIM22	72	240	68	N	0.570543	0.00380362	24	15	4.90988	1	1	24	14.5	1.40922	ATGCTAGAACATAATGTAGCATTACTTTCCCCAGGGTTTATTGTTATGTAAGTTCTTGTTCAGCTTCCTTTGTTTTCTTTCACTTCTGAGAATTTAACTTTCGTTTCTCACTCAGCTCCTGTGGGGAAACTCATTTGTGGAGACCAGCCCTCTGGCTTGGTGAGTGAATCTGGTTTACACCGGCTCCTGCCCTGCCTTCACTCTTCTCCCCTGATTCAAGACTCCTCTGCTTTGGACTGA
SLC44A1	36	75	111	Y	0.798557	0.0134079	24	20	7.3827	1	1	24	16.5	0.992758	ATGTGGCCGGCGCCTGCCTCTAGCCGCGCCGCCTCTTGAGTACCAGCCGCCGCTGCAGCCGCCGCCGCCGCCTAG
CRY1	261	582	54	Y	0.952784	0.0197614	24	15	8.36655	1	1	24	15.5	2.89654	ATGAGGAGCCGGGGGCGGGGCCGAGGCCGCTGACGCGGCGGCGGCGGCAGAGTCACCCGGGCAGCCTCGGGACCGGTCACCGGCCGGCAACCGTCCAGCGGCCTCGACCACCGCCTCTAGCCTCCGTTCCCGGTCCTTTCTCCCGGGCCGAGAGACAGCGTCGCCGACAGGGGCTCATTCCCCTCCGGTTCTCCTCGGTGACTCACCTCGGGCGGGCCGTTTTGTCTTTAGGGGCCGCCTTGGTGGGGCGAGGTTTCCGTGACGAATCTCCTGGGGCCGTCCGTGCCGGCTCGGGCCGTCGTGGCGGCTCGAGCTCCTGGAACTTGCTCAGGCTCCGGAGGTCCGAGGCCCTCGAAGTTATGCGTCGCCTCCAGGCGGTTGCGGCGGGCGCGGGCTCCT…
LDLRAD4	155	228	84	Y	0.975906	0.0238555	24	18.5	11.1353	1	1	24	16.5	0.405688	ATGCTGGCAGCGGCGTGGCCAGGGGCGCCCGTGTTCTGAGGGCCTGAGGGCCAGCCCCTCCACCCGCGCCATGGCCTCCGCGCCCTGGCTGGACGGCTGACGGGAGCAGGGACCGCCGCCGCCCAGGTGCCACACCCAGGTACCGCCCGCCCGCGCGAGAGCCGGGCAGGTGGGCCGCGGATGCTCCCAGAGGCCGGCCCAGCAGAGCGATGGACTTGGACAGGCTAA
VEGFB	168	42	41	N	0.975906	0.0238555	24	18.5	7.42143	0.739258	0.0806795	24	18	4.74272	ATGGGGCTCTGGCTGTCGCCGCCCCCCGCGCCGCCGGGCTAG
SLC1A3	44	384	49	N	1	0.0343842	24	16.5	7.24299	1	0.249873	24	14	0.805302	ATGACAGTGAACTGACAAAGCGTGAAAGTGGTCTAAGGAGCAAAACAAAGCCAGCAAGCCTGCTTCTGGTGTGCCAAGATTAATCAATATTCCAGAAACCTCGGGGTTTCCCCCTCCTCCCTGTGCGGTTTCCATTCCCCACTCCTCCTTTCCCGGGCACAGACTCCTCCCCTTTTCTTAAGTTGCCCTGATAGTAACTTGCAGTTTCAGAGCACATGCACACTGTCAGGGCTAGCCTGCCTGCTTACGCGCGCTGCGGATTGTTGCTCCGTTGTACCTGCTGGGGAATTCACCTCGTTACTGCTTGATATCTTCCACCCCTTACAAAATCAGAAAAGTTGTGTTTTCTAATACCAAAGAGGAGGTTTGGCTTTCTGTGGGTGA
ZSCAN31	68	762	75	Y	1	0.0410599	24	13	3.42109	1	1	24	16.5	2.74644	ATGTAAAGTCTTTCCTGTTTGATTGGGAACTGACCCAGGTGCCAGGCTTGGGGGGACACCGGACAACCAAAGGCAATATGTGGACTCGGCAAGCCACTGGTCCCTAAACCTGAATAAGTTTCCGGGCAGAGCTGCATTTATTGACGGTTATGAAAGCTGATTTAGAAGCAGCAACGCAGCCTCTTGCCTGGAATTGGGATGATGCGGCTGAAACCACCTTCCTGGCAGCCAAACAGGCTATTCAGCAGGCACAAGCCCTATGGGTAGCTGATCGGGGCACCCATTTAAACTTGATGTGCATGTGACCAGATAGTTTTGACTGGGGCTTATGGCATCACACAGAGCTCTTTAGAATGCCAGTAGACTTTTGGTCCCAACTTTGGAAGGGAGCTGAGCTCC…
ITGB5	131	39	128	Y	1	0.0579452	24	16.5	20.0788	0.634265	0.0579452	24	17	16.0698	ATGGTGGCGGCGGGGCGCGGGCCAGCGCGGGCGCCGTGA
NR1D1	27	558	47	N	1	0.0579452	24	1	16.7348	1	1	24	16.5	0.430655	ATGGTACCTGCTCCAGTGCCGCGTGCGGCCCGGGAACCCTGGGCTGCTGGCGCCTGCGCAGAGCCCTCTGTCCCAGGGAAAGGCTCGGGCAAAAGGCGGCTGAGATTGGCAGAGTGAAATATTACTGCCGAGGGAACGTAGCAGGGCACACGTCTCGCCTCTTTGCGACTCGGTGCCCCGTTTCTCCCCATCACCTACTTACTTCCTGGTTGCAACCTCTCTTCCTCTGGGACTTTTGCACCGGGAGCTCCAGATTCGCCACCCCGCAGCGCTGCGGAGCCGGCAGGCAGAGGCACCCCGTACACTGCAGAGACCCGACCCTCCTTGCTACCTTCTAGCCAGAACTACTGCAGGCTGATTCCCCCTACACACTCTCTCTGCTCTTCCCATGCAAAGCAG…
CYHR1	63	42	91	N	1	0.0579452	24	15	8.3962	0.634265	0.0579452	24	14	2.49053	ATGGGGACCTGGAACCTGGGCTTACTAGAGTGCCGCGCGTAG
RNF150	324	225	106	Y	1	0.0579452	24	20	7.43192	1	1	24	16.5	0.73321	ATGAGAGAAGGCGAAGCCGGGCGAAGGAGCAGGACGCTCGGCAGCAGGACTCCTCCGCAAGCCCCGCGGGCCCTCTGTTCCCGCGCCCCCCGGGCGCCCAAGAAGCAAAATGCAACCACCGCGCTACAGCTGAGAGGGGAAGGGGCCAGCGCCATCCGCTCGCCCGGAATCCGGTCCCCGCGGCGGCTGCGCGTCCCGGCCGCGGCCCCTCCGGCCCGGGAGTGA
CSDE1	91	339	93	Y	1	0.0684872	24	18.5	91.204	0.214972	0.00191087	24	16	51.5981	ATGGCGGCGCTGGAGAGGGGGCGCTGAGCTGTTGGGTATGAAGTGTAACAGAACAGACTTTACCACCTGAAACTGCTGCTTCAAGTTCAGATCAGGCAAGGAACAAACCTCGTAACAACTAACAAGACCAAAGAAGAGTACACTTAAGTTGAAGACACAACACTTGATCTGAAACAAGAAGTTTGTGCCTACTCAACAGCTTTGAAAGAGCACTTCCCAACGCTGCTAGTAGTCTTTGTTTTCTTCAGTGCTGTACTGTGAGATTGCCCGGTACAGCAGCAGTTGTATTCTTTATTAGCTTGGTAGATCATTTTCTCTCGCTCTTTTTTTTAATACTAG
KIF3C	153	393	112	Y	1	0.0684872	24	19	11.7361	1	1	24	16.5	3.05672	ATGAATGATCCCCCAGCTTGGGGGGAGGACTCCAGGTGAGCCTCTGCCCTCGGGAGGCCCGGGACCCCCGGCCGCCCACGACCGGCAGCCCACGCTATGGATCCCTAGAGGAAGGAGGAGAAGACAGCTCGCCGCCCACCCCCATCCCATTTTCCTCTTCCTTTATCTCATTGTTGCCGAAGCTGTTTACGGCAGCGCTCCCTCTGCTCCTGCATGGGGCGGGCTCCGGGCACGGCTGCTCGGCAGGCGCTGCTCCCGCGGCGACTGGGGGATTCTGCCTAATTCACCTCCCAGCCGGTGCAGAGAGGACCGGAGAGCGGTGGAGGCCCGGACTGCAGCAGCGTTGGGGCCACCTCCCAGCGTCCCCACCCTAGGAGGCTGCATGCGGATTGA
GMCL1	54	60	94	Y	1	0.0684872	24	15	5.4953	1	0.267231	24	17	7.94822	ATGGAGACTGTGGCGTCCGCTGCAACGGTTGGGGCTGCGCGTGAGAAGGTGGCGGTGTAG
TUBA1A	4	591	311	N	1	0.0806795	24	16.5	48.8921	1	0.513638	24	18	17.6183	ATGGATGCTCGGCCGACTGCTTCTGCACGGTCTCTTTGTCTAAAGGATGCAAACAGTCTACGGATGCTAGAGAAAAAGGGGTGGGGGAGAGATTACCTCATCCCACGTCGCTTGCACCAATCACCAGTCTCCTGTCATGGCTTCTCTGGGCAGATTGGGGGTCTGGACCAACAGGAAAAGGCCCCGGCCCATCCCCATGGTGACCGAGTTGTATATAGGGAGCCGCATCCGCCTATGTGCCGCAGGTTCTCTTACATCGACCGCCTAAGAGTCGCGCTGTAAGAAGCAACAACCTCTCCTCTTCGTCTCCGCCATCAGCTCGGCAGTCGCGAAGCAGCAACCATGGTGAGAATCGGCTTCGGCTCTTTGTGGCCGTTGGGTGGAGTCAGCGCCCCCAGG…
SCD	36	315	140	N	1	0.0806795	24	16	30.1964	1	0.150471	24	14	7.06236	ATGACGAGCCGGAGTTTACAGAAGCCTCATTAGCATTTCCCCAGAGGCAGGGGCAGGGGCAGAGGCCGGGTGGTGTGGTGTCGGTGTCGGCAGCATCCCCGGCGCCCTGCTGCGGTCGCCGCGAGCCTCGGCCTCTGTCTCCTCCCCCTCCCGCCCTTACCTCCACGCGGGACCGCCCGCGCCAGTCAACTCCTCGCACTTTGCCCCTGCTTGGCAGCGGATAAAAGGGGGCTGAGGAAATACCGGACACGGTCACCCGTTGCCAGCTCTAGCCTTTAAATTCCCGGCTCGGGGACCTCCACGCACCGCGGCTAG
TRAM1	44	123	94	N	1	0.0947331	24	16	10.8523	0.634265	0.0579452	24	16	7.00711	ATGCTCGCCCCCGCTGCGGGCTAGCTGTTGTGTTTTTTTTTTTCCCCCGGGCGGCCCGGCGGCTGCGTACTGGCTGTGGGATGGGAAGTGAAGCCCCAGCGAGCGGCTGCAGCGGGGCCGTGA
TXNL1	153	360	87	Y	1	0.0947331	24	17	9.9125	1	1	24	8.5	0.570166	ATGCATATGCCAACTTTTGAGTCTCAGTCTGCGCCTGCGCACGTGACCTCTACACGTCTCCTCTGCGCCTGCGCCGCTCAAGTTAGCGCGAGGCTACTCAGTCGAGGGTGGGACTACGCTTCGCGTTTTGGGATTGGGCGCTGAAGGCCAAACCGGACGACGCGGAAATGACGTCACGCCGGGGGCCCTGCCGCGCGGTGGCTGCTGGGTGCCGCACGCCTTCCCATCCTCCTCCTCTCCCCTCCCCCATCCCTCCCCGCCCCCTCGGCCGCTCCGCTCCCTGGCGTGACTCGGCACTGAGAGTCCCGGGAGAAGACTCGGCGGTCGCCACCTCTTCTGTCCAGGCCTCGGCCTTCCTGA
ZNF638	12	534	94	Y	1	0.110879	24	16	9.58221	1	1	24	14.5	0.52446	ATGCGTGCAGCTCTTTGGAGGCGGTAGCGTTTTCGGCGTCGAGACTGGAGGCTGAGTGCTAAACTGTGTGGGGCGCGGATGGGATCCAGCTGTTAGTCGGTATTACAGCGTGAAATAAATTCCCAGTATTTTTCAAGATTATGTAAAAGGAGTTGTAATTACTGCTCAGCACCTAGGACAGCACCCAGTGCAACACAATGTACATGAACTCTGGCTTGAGGTTTGGGGCTTGTGTTCTGCATTCAGGAAAGAAAAGAAGAGAAAGTTTTTGGGAAATTTAAATCTTCGTAAGCCCTTACTCTAAAAGTATATGAAATGCAGAATGGTTTCATGGCTTTATTTCAAAATGTTTTACACTGGCTGTAGAACCCACTTCATGAAGTAGTTTGAGTTAAAATG…
TM4SF1	60	138	37	N	1	0.110879	24	10	3.13244	1	1	24	10.5	1.5786	ATGAAAGCAAAGTACCTCATCCCCTCAGTGACTAAGAATCGCAGTATTTAAGAGGTAGCAGGAATGGGCTGAGAGTGGTGTTTGCTTTCTCCACCAGAAGGGCACACTTTCATCTAATTTGGGGTATCACTGAGCTGA
SUPT7L	294	18	32	N	1	0.129367	24	4.5	9.02071	1	1	24	16.5	0.85304	ATGCCTGGCATTTGATAA
CCDC90B	3	237	123	Y	1	0.150471	24	18.5	9.39354	0.499126	0.0343842	24	16	4.9	ATGGCCGCTGGCTATCTTGGGGGAGCCAGCTGTTGGACTATGCCCCACTGCCAGGAAACAGGCGCCGGAAGGTTCTCTGACAAGATCTCGCTTTCCTAGGGCGGTGAAGGCGTTCAAAGGTCGGGAAGGGGCGCTGGGAGAAGCGGGGCAGCGCTGAGCCATGCTCGCGAACTGTGGGTCTGTCTGTGAAGAGACCCAGTTTCGTGGGACCACGGTGGCGCCTGCGCTGGGAGGTGA
GDPD5	254	168	116	Y	1	0.174483	24	7	9.569	1	0.267231	24	18.5	9.166	ATGGAAAGCACTTGGAACAATGCCTGGCTGTTCCCCTCTTTGGCCCTCTCAGGGCCCTAGGAGCCTTTGTGTGTCCTGCTCACATTGTCTCCAGGGCCTCGGACAGGGCCTGGTACAGAACATATGACTGAGTTTCTGGAGTCCCACAGGCCAGCGTTGGAGTCCTGA
LRP10	436	72	46	N	1	0.174483	24	15	7.21423	1	0.923131	24	20	8.42019	ATGGAGCCCCCCTGGGGAGGCGGCACCAGGGAGCCTGGGCGCCCGGGGCTCCGCCGCGACCCCATCGGGTAG
PER3	41	126	58	N	1	0.201719	24	11.5	14.735	1	0.349965	24	15.5	2.16809	ATGTTGGAGGGAAAAGCTCCTCGGAGATGAGCGTGACCCCCTGGCTCGTGGTGGCCGCCTGTTCTCACTAACGCCATGGCGGGGACCGGAGTGAGAAACCGGTGTCTGTCACTGACTGCAAAGTGA
TM7SF3	126	30	83	N	1	0.232515	24	19.5	15.0111	0.362914	0.0163087	24	17.5	27.5518	ATGGCGCCCGATGCGGGCGCCCCGGGATAG
PTPRK	153	60	155	N	1	0.267231	24	18.5	10.6117	1	1	24	14.5	1.19008	ATGGAGAGCTGCCGCCGCGGCCGGCCGGCGACGCTGGCGACGCTTTCGCCCCTGAGGTAG
C2CD5	64	93	72	Y	1	0.267231	24	13.5	2.58214	1	1	24	16.5	2.69752	ATGCTGACTGGGTTTTGCTTTTCGTCCCAGCCTTGTGGGGCCGGGACGGAAGAACCCATCAAAGCCCTTCCTCCCGCCGCCTCTCCGGAATGA
ASPHD2	224	39	135	Y	1	0.306247	24	17	3.81567	1	1	24	6.5	1.74901	ATGTGACAAAAACCAGCCTCTTCCACCCCACTGCAGTGA
HDLBP	56	42	136	Y	1	0.349965	24	9	15.5236	1	0.174483	24	16	14.899	ATGGCGGCTTGTCCCTGTTTCGCCACAGTTCCTACCTTATGA
KLF7	26	357	66	Y	1	0.349965	24	15	7.30482	1	1	24	15.5	1.51026	ATGCAACCTCCCAAAATAAAGAGCAAAGATTGCATTAGGAGCGAACAGCGCTGCAGAAATAGATGGCAGCTTCGTGTCAGTGAGTTTGCATCCCCCTTCCTGATCCACGAGCTGGAGTGATTAGAGCCCTGGAAGGGAATTGTTACTCCCGTGGAGAAGTCCCCTTTTCCTGGCAGTCGTCTGCACTGTACACGCTGGATGCCTCTCTCCATCCACCCCACTCACTCGCTCCTCTCTCACCTCCTCTCTCCCTCTCCTGCATTGATTTTTTTTTTTCCTTTTTAGTTGACTGAAACAAAACAAAACAAAAGGGCCACTGGATGTCTGCCTTCTTGGGGGGTGAGCCAGACAGACTGA
ARNTL	196	162	51	Y	1	0.349965	24	18	5.77085	1	0.780552	24	18	0.444516	ATGTGGAATCCTGGGCCTTCATTGGTTCCGATGTCATAGGAATCTACGCTAGAGGGCTTCCTGTGTGCCGGGCACTGTGGTTTTTGGAAGAAGCTGACCGCCTGAAAAGAAATTATAAAACATGAAAATCGCTTTGAGGTGACCAAGTCCAGAGGCCCCTAA
MBTPS1	103	339	61	Y	1	0.398806	24	19	20.5128	0.592475	0.0488609	24	16.5	30.3706	ATGGAGTGCCCAGGCGTGTTCGCCGCGGAGGCGCCGTTATCCCGGGCCCGCCGGCCCTGAGCTCCCGGCGGCGCAGATTGGCTCACAGTGGTTGATTGATCAACCCCATTGGACGTTGGTTCTGTGGTACAAATGGAGTACAGGACTCAGTCGTCACGGCCTGAGTGAGAGAAGCCTTATTTCCAAGATGGAGAAGAAGCGGAGAAAGAAATGAAAGCCTCTCTTCAGGCTGAACCACAAAAGGCCATGGGATTTAACTTTTATTTATGTTGGGCAAGACTGTAAGATGGCTGATTAGTAATGTTGCAGCTTTTAGCTGAAACAAAAATTCACTTTTAA
TBC1D9	42	90	141	Y	1	0.398806	24	22	4.80332	1	1	24	6.5	2.79207	ATGCTGCTTGCCGCGCCCGCGTCCTCACCGTCCTCCCGGGCCGCCTGCTGGGGCTTTGTTGTGGCCCGGACGCCGCGGGCCACCCCCTGA
NIPAL3	61	225	122	Y	1	0.398806	24	1	4.73383	1	1	24	13.5	4.9216	ATGAAGGAGGCTGTGCCTCCGGGTTGCACGAAGAGTCCGAGTCATTTCTCAGAAGGTTTTGATAGGTGGGCCTTAGAGGAGACGCCGCCGAGCACCGCAAGAACTGGAAAACACACCCCTCTCTGTCTGCCTGGGAGAGCCACGGAAATTGGCACTTCTCTGAGTGAAGCTGAGGAGAAGGCTGTAAATCTGCCAAAACAGCCTTGAAGTATTCTTTTGTCATGA
PLCE1	319	264	52	N	1	0.45321	24	19	4.19481	1	1	24	16.5	1.26109	ATGGATCAGAAGTTGCAGAGTGCAATCCCGAGTAAAAGTCTTCAAAAAATTTTGCTTCAGGTAACAGAGGAAGGAAAATTGATCTACCACCTTAAAACCCTGATCTAGAAAAAATATATATTCATGATAGGAAGTTATAACTAAGAAAATTTATTTGCCTCTTAATGCTCCTGAATGAAAGGAATTATCCCTTTGTTCTTTGGGAGGACTTGTGTATCTGAGATTGTTGTAATAATCAGTCATTTTATTAAAACCTTGACATGA
GEMIN7	174	15	49	N	1	0.45321	24	6.5	3.66733	1	0.923131	24	7	3.52297	ATGTTTGTCCACTGA
RNF10	26	309	149	Y	1	0.513638	24	17.5	34.9088	1	1	24	17.5	4.36857	ATGCTGTTTGGCGACTCGTCGCCATTCCCGGAGCAGGTCGGCCTCGGCCCAGGGGCGAGTATCCGTTGCTGTGTCGGAGACACTAGTCCCCGACACCGAGACAGCCAGCCCTCTCCCCTGCCTCGCGGCGGGAGAGCGTGTCCGGCCGGCCGGCCGGCGGGGCTCGCGCAACCTCCCTCGCCTCCCCTTCCCCCGCAGCCTCCGCCCCGCCAGGCCCGGCCCGGACTCCCGAGCCCCGGCCTCCTCGTCCTCGGTCGCCGCTGCCGCCGGGCTTAACAGCCCCGTCCGCCGCTTCTCTTCCTAGTTTGA
ITM2B	11	63	150	Y	1	0.513638	24	20	5.89948	1	1	24	13.5	0.17158	ATGTGCGAGCAGTCTCCGCCCTCGCGCGGGAGCTGGGAGGCTGCGAGATCCCTACCGCAGTAG
FLYWCH2	52	210	110	N	1	0.580561	24	18.5	9.63002	1	0.825244	24	17	4.26954	ATGCTCGCGCTGTGACCCCGGCTTGAGGTAACAGCGCGAGCTGAGGCTGGGGCCCTTGGCGCGGAGGCTGAGGGACCCGCCGCGGCGCTGTCGCCGGAGAGGGAGGGCACCGCTGTCGTCGGCCAGAAGCCAAGGAGTCCTCAGTGACGGTGGGATCCACAACATCTCCACATCGCTGTCCCCACCCAGCCAGGGCAGCGCCAGCACTAG
LSM10	25	57	69	Y	1	0.580561	24	9	8.92615	0.933936	0.129367	24	19	15.3973	ATGGTTTCTCCGTCCTGCTGCAGCCGGCGGGAGGCAGCCAGTCCAGGCGCCCGCTAG
NUDT21	40	36	72	Y	1	0.735861	24	4.5	8.72451	1	0.45321	24	13	3.33744	ATGGCGGGCAGTAGCCGCTGAGGGGATTGCAGATAA
CTDSP1	108	42	187	N	1	0.825244	24	15	18.8864	1	1	24	16.5	0.826708	ATGTTTGCATCCGCCTCGCGGGAAGGAAACTCCATGTTGTAA
TIMM21	31	231	37	Y	1	0.825244	24	3	16.8592	1	1	24	9.5	0.367827	ATGGCGGGGACACTGTGAATGTCAGCCCAGAAGGTGATCAGAGCCTGTTAATTAAAATGGAAAGAAGACAGAAGGGAAGGTAGACATCAGGTTCTCCCTGGAGACTTTTCGTTTTCATTTACGCTGCGGAAACTGACGTTTTTGCCTAACACCCCATGTAATGTAAACGTATAGGCTTGAGTACGTGTCCGGCCGCATGTGTAGTGAACCCTAAAGCTTTCCTAATTGTAG
TIAM2	47	1185	42	Y	1	0.825244	24	21	10.506	0.547015	0.0410599	24	14	14.9469	ATGGTAGGGATCATTTTGGAAGACCTCCTGTAGATATAAGAGAGAATCTTGTGAGGCCAGGTATAGATCATCTTGGTCGAAGAGACCACTTTGGCTTTAATCCAGAGAAGCCCTGGGGGCATAGAGGAGATTTTGATGAGAGAGAGCATCGGGTTCTACCGGTCTATGGTGGTCCAAAAGGCTTACATGAAGAAAGAGGTAGATTTCGGTCTGGAAACTATCGATTTGATCCTAGAAGTGGTCCTTGGAACCGAGGATTTGGACAAGAAGTTCACAGAGATTTTGATGACCGCAGAAGACCCTGGGAGAGGCAAAGGGATAGGGATGACAGAGATTTTGATTTCTGCAGAGAAATGAATGGAAATCGTCTTGGACGAGACAGAATTCAAAACACTTGGG…
COA4	6	48	52	N	1	0.825244	24	6.5	7.00679	1	1	24	7.5	0.710466	ATGTACAGAGGATCCCCAACCGCCTGCGAAACCCAAGCCGCCGCGTAG
BBC3	34	99	32	N	1	0.825244	24	16.5	2.03351	1	1	24	12.5	1.32259	ATGGAAAGTGTAGAGGAGACAGGAATCCACGGCTTTGGAAAAAGGAAGGACAAAACTCACCAAACCAGAGCAGGGCAGGAAGTAACAATGAGAAACTGA
TMEM59	28	60	163	N	1	0.825244	24	15	2.01329	1	1	24	5.5	1.0175	ATGGTTGAATTCCCCTCCTCACGCCAGCCTAGGAGAAGAAGTTCGTAGTCCCAGAGGTGA
TSHZ1	28	501	56	Y	1	0.923131	24	18	8.16497	0.382937	0.0197614	24	21.5	2.61161	ATGTGTCTGTCTATCAGTTGAGACTGTCTGAAAGCTCTGCGATCCGAATGTGTGTTATATTTCACTGAAAAGAGGAGAGAGCGAGAGTGCATCTCCCTCTCTCCCAGGAGTTTGAGGGGGGGGGGGACAGTCCACGCTCATCTCGCCCACCCAGTGAATGTCTGCTCTTCACCCCCTTTGCACACACTCTCCGGGTTGTTGTTGCCTTTTTTTTTTCTTGGAGGGGGGGGTGCTTTTTGTGTATTTTTCAAATTTTTTTCTGTTGGAAGATCAAGACCGGCCAAAAATCCATGATCAAAATGTGTTTGCATTAGATTTCGCATTGGAAGAAGCGGCGATCCTGGCGGCCAAGCCCCCCGGGTGGAAGCGCGGGGCACCAAGTGGCGCTCCGGCGGGGTG…
KIAA1432	67	87	38	N	1	0.923131	24	16.5	5.05789	1	1	24	16.5	0.139665	ATGCCCCGAGCTGCCGCCGCCGCCGCCGCCGACTCGGCCGGTGGCGGTGTGGGAGGTGGGCGACCAGCCCGGGGCCGCTGAGTGTGA
PBX1	49	333	82	N	1	0.923131	24	18.5	3.5661	1	0.695165	24	21	0.744792	ATGCATATTTGCAAAAGGATTAAGCCACAGATTTAAGCGCCGGGAGCCCATTTCTGCCTTGCAAAGGAGACCGGACTGAAAAACCTAAAGCCAGCTCTGATTTCTTTTCGCCAAGTGGGAAGGTGGTTTATTTTTCTTGCTTTTTGGAGTCAACACCCTTCCCCACCAGCCCTTATCCCCACCCTCACCCCGCAACCCCTTCACGCCCCCTCCCCCTCCCCCTCCTCATCCTCCCACCATCCTCTAAAGAGGCAAAGGGATTTTTTTTTTCTTTTGGTCTTCTTTTTTCCCCCTTCCCTGTTTATCCTGAAAAGGATTTGAAGACAAGCTTGA
SPRTN	10	264	175	Y	1	0.923131	24	8	0.792462	1	1	24	12.5	0.224509	ATGCCATCGGTTAAAGCGCATGCGCAAGATGAGCTATTGCGGAAGTGAGGGGAGGGAGAGGCCGAGAGAAATTTCGGTACTGCGCATGAACCGAGCGTGACGTTGAGGTTTGAAATAACCGGCAAAGAGTAAAGGCTGAAACTAGCTTCCTGAAAGCTTCGTAGGGCCCGAGCCCTGTGAGCCCAGGTTCTGCGCCCACTAGGAGGTGTCATGCTGACTGCTTTTTTTAAAGCCCTAGAATCTTGGCTTCGGCGTTTGGGGTAA
VCP	96	246	48	Y	1	1	24	16.5	25.1895	1	0.201719	24	18	20.4542	ATGATTCGGCTCTTCTCGGCTCAGTCTCAGCGAAGCGTCTGCGACCGTCGTTTGAGTCGTCGCTGCCGCTGCCGCTGCCACTGCCACTGCCACCTCGCGGATCAGGAGCCAGCGTTGTTCGCCCGACGCCTCGCTGCCGGTGGGAGGAAGCGAGAGGGAAGCCGCTTGCGGGTTTGTCGCCGCTGCTCGCCCACCGCCTGGAAGAGCCGAGCCCCGGCCCAGTCGGTCGCTTGCCACCGCTCGTAG
RPL8	6	33	73	N	1	1	24	15.5	8.90379	0.499126	0.0343842	24	16	15.0187	ATGGGCAGTATCCGCCGCCATCCTCTTCCGTGA
TMCO3	136	150	76	N	1	1	24	16.5	7.1572	0.547015	0.0410599	24	15	8.21697	ATGCAAGGAAGCCCTCCGGCGCTGCGCTCCGAGGCGGGAGACAGCGTCCCCCTCCGCCCCTCGGGTCCTGGCGCCTCAGAGCCCGGCCCAGGCCGCGGAACGGTGATGCTCGGGCCGGACGGGCGGGCGCGGATCCCTGCGTCCCGCTGA
DR1	197	474	55	N	1	1	24	10.5	4.80159	1	0.150471	24	18	6.77915	ATGTTGTGAGGCGGCGGCGCGGGTGTCTGAAGGATGGTTTGGCCGAGGCGGCGGCAACGGCTGCTGGCGGCGGCGGCAGCGGCAGCGGGGCCTCGGGCTCTATAGAGCCGAGCCCGCTGGGTACCCGCCCGGTACCGCGGCGAGGCCAGTGCCCCTGGATCTTGCCTCTGCTCCGACGCCGTTGGGGACCAGTTAGGCGACAGCGCCCGCCCCTCTGAGGAGACACGAAGGTGGTTCCCCAGCCGCTCAAATTTCCGGACCACCGCGCTTTCCCCTCCTCAGCCTGGGCTGTGCTCTCTCTAGAATCCTCGGGCCCCCACTTTCTTCCCAAACTCATCCTAAATCTCTCACACACGCGAGTGTTCCCAGCCCTCAAGCCAGCTGCTCCTCCGTTCATTT…
PABPC4	35	822	42	Y	1	1	24	7.5	4.33374	0.418246	0.0238555	24	16.5	12.3285	ATGGAGCGGTGGCTCCCTCGGCCGCCTCTCTCCGCCCCGGGTCGCTGCCGCCTCCGCCGCTTTCGGGCTTCGCAGCCTGAGGAAAAAAAGAGAAAAAGATAAAAAAAATCTGAAAACGCTTCAAAATCCTGAAAAAAAAAAAGGAAAAGAAAAAACGAATCCTCGGAGAACCCGCGGGGAAGTCACTTTCGTACGCTTCCGGCCTGCCCCGCGCCCGCCGCCGCAGCGCTTGGCGTCCGTCGGTCTCCGTCCGTCGGTCCGGGGGTGAGCCGCCCGCCCGGCCCGCCGTGCCCTCCCCCCGCTCGGGCCCCGAGCCCCGCGCCCCGCGCCTGCCCCGGCGCACCACGTGTCCGTGCTGCCCTTCGCCGCCCGCCCGGGGCTCGCCGAGTCGGCGCCCAC…
CLSTN1	126	549	85	N	1	1	24	16.5	3.86072	1	1	24	14.5	1.91664	ATGAGTCCTCGGGGTGGAGAAGGAGGAGCGGGTCCCCGGGTACCGCTCACCCGGCCTTAGGAGCCCGGGAGCGCGCGTAGGGACGCGGAGTTGAGGCTCTCCATCTGCGGCCAGGGAAAGGGATACAGTCCCCCGGGCCCCTCCCGGCCGCTCGGAACCCACCCCAGGCGCGTCCCCGCGGGCGCGCGCTCCAGGCGGGGCCGACGGGCTCGGAGGCGCGCGCCCGCTGCCGGGTCCGCCGCGCGCGCTCCCTCCGCTCCTCTCCCCCGCCCCTCCCGGGCCCGCGCGCTCCCAGGGTCCGCCGCGCGCGCGCCTCGCGTCGCTCCCCATCCCCGCCCCTCCCGCCGCCACCCCGCCCCCGGCCGGGTACCCTCGCCGGACCCGAGAGAGAGCGCCGCC…
DNAJC2	120	75	57	Y	1	1	24	8.5	3.39271	1	1	24	13.5	2.5183	ATGCGCCGGTTCCTGGGCGTCTTAGAGCCAAGGCGCGAGGCTCGGAGTGAGAGGTAGAGCTGGAGGGGACCCTAA
PPP2R5E	16	381	194	Y	1	1	24	9.5	3.12418	1	0.306247	24	15	20.5223	ATGGACTCAGCCGCCCGGTGATATTGACAATAGGAGAGAGAAAGGGGCATTGACTGGGACCCACCGCGGGTAGCGAAAGGTGGCTCTGGCAGCGGCGGCTCCAGCTCCTGCGGCTCCTCCTCCTTATTCTGTCCCCTTCTCTTGCTGCCGCTGCAGATCCAGTCTTCCTCCCTCCCTTCCCCCCCTCCCCACGTCGTCGCCGCCGCCGCCGGGTCCGGGGCAACGAGCTGAGGCGCCGCCCGCCAGGAATGTGAGCGAGGAGCCACCGGCGGAGCCGCAACGGGGTCGGTGCCGATTTGATGGGACGGGCCCGCGGGGGAGGATCGTGAGGCCGCCGCCGCCACCGGAACGCTGAGGTTCGGGTCCGGCCGTGAGGCCTAG
KIAA0355	158	666	36	Y	1	1	24	15.5	2.57668	1	1	24	15.5	2.51268	ATGTTACAAGGAAACCGCTACCTCAGCAAACAAAAGGAATGGAGGAGGAGACTTACAACAAACGCCATTTAAAAAAAAAAGAAAAACTTGTTTTCAGGAAACATTAGAGGAAATTTGGAGAATTTCAGCATTGCATAGAAGCAGCCTTACAGGTAAACGGATTTGACGGGCAGGCTCTGTCAAAATTCTGCAGAAGTTTGATCTTCCTTCTTAAGGACTTTGTGTGAAGTAATTCTTTACTGCTTTTAAATTGCTGTTGATCAGCTTCTGGGTTTTTGGGTTCTAACTTTTTTGGGTATATTGAAGACACAGTGTATTACATTATATTACATTTTTAAACGTTAAGTTATTTTTCTGCCATTGTAAATACAAGTATCAAAATATTCTTGCAAAGAAGTA…
RPTOR	25	639	142	Y	1	1	24	9.5	2.5225	1	0.267231	24	18	10.4646	ATGGCGTCCTCCTTGATGGGCTGATGAGATGAGTTTCACTGTAGCTCCAAACCAGAGGGCAAAGCTCCCATGACCCAATAAGCCCACATTGTCCCTTTCCTCCGTGGTTCCGTGTCGCCCGTTTCTCAGGACTCGTTCTCAGGCAGGAGAGAGCCTCGGGGCTGAAGGCCAGGACCAGCCAGGCCGCGCGGACCTGAGGTTGAGGAACCGGGTGCAGGCGAGCACGATGGGCCGGTCGTGGCTCTGGTTGCAGCAGCTCAGACGAGTGCGGGACCCGCAGGGCTGAGAGTGGCTGGAGGAGACCCAGGGCCCTTTGAACCCGATCCCTTGGCCGGAGACCTCAGCCCAGTCGGCCCAGTGGGCGAACCGGCACCAAGAGCGGCCTGCCTGTCTTCGGAA…
ATP11B	6	141	111	Y	1	1	24	15.5	2.49357	1	0.513638	24	14.5	2.78965	ATGAAGGTGGCTGCGGCGCGGCGGCAGGCTCAGCTGCGCCGGGCGGGGGCGGCGCCGGGGCCGCGCCTGTAGGACTCGGGGCCGACGCCGCGGGATGGGGACGCGGCGCGGGGAGTGAGGCAGTGGCGGCGGCGGCGGTAA
CDC25B	102	480	197	Y	1	1	24	13.5	2.34533	0.634265	0.0579452	24	13.5	8.01663	ATGAACTTCACGCCTCAGCGTCCAGGTCTGTAAAATGGGGTGTCTAACGCAGACCGTACAGCCCAGCTGGGTTTAGCAAACTTCCGGGAGCCAGTTGGAGCCTCTCCCCATCCCTAGCGGTGATCCCAGGTGACGACATGCCGCGGGGGGTCCTGCGGAGGCCACCCTAGGGCGTTGCTGCTGCCTTTGGGAGTGTGGAGCTCCAAACCATGTCGCGAGAGGCGGATTTTGGGAGGCCGGGATCCTCGCGCCAGGGGGATGTGCGAGGGTGTGGGATAAATCTTAATTCCTCCGGCCCACCCAAAGCCTGGAAATCCAGCCTCCGCGCCTCTTGCCCTGCGGGCCCCGCCCTCAGTCCCGCCCTCATCTAACCCGCTACCCCATTGGTGGCGTCCGGCG…
RTCA	5	129	85	N	1	1	24	6.5	2.33968	1	1	24	14.5	0.520024	ATGCGCACTGACTGCGGAACTGGGCGAACCCGGGGGTTCGTTTCTGCTGACTCCAGTGTCCCGAGAGGCGCCGCTTCTTCCGCTTTCTCGTCAGGCTCCTGCGCCCCAGGCATGAACCAAGGTTTCTGA
PC	95	507	38	Y	1	1	24	17.5	2.32878	1	1	24	8.5	1.62412	ATGGGGAGGAGGTGACGCCGGAAGATGTGCTCTCAGCAGCTATGTACCCCGATGTGTTTGCCCACTTCAAGGACTTCACTGCCACCTTTGGCCCCCTGGATAGCCTGAATACTCGCCTCTTCCTGCAGGGACCCAAGATCGCAGAGGAGTTTGAGGTGGAGCTGGAGCGGGGCAAGACGCTGCACATCAAAGCCCTGGCCGTGAGCGACCTGAACCGGGCCGGCCAGAGGCAGGTCTTCTTTGAGCTCAATGGGCAGCTGCGGTCCATCTTGGTCAAGGACACCCAGGCCATGAAGGAGATGCACTTCCACCCCAAGGCCCTAAAGGACGTGAAGGGCCAGATCGGGGCGCCCATGCCTGGGAAGGTGATAGACATCAAAGTGGTGGCAGGGGCCAAGG…
CCAR1	12	42	66	Y	1	1	24	7.5	2.32658	1	1	24	16.5	1.70294	ATGCGCCTAAAGCTGACGGGTTTGAAATGGCTTCGATGTTAG
TMEM2	425	66	50	N	1	1	24	14.5	2.16639	0.324594	0.0109801	24	17	9.36531	ATGGAGAGGAGATCTGGACCCGAGGACGCCAGGGACTCCTCTCCGTCTCCCTGGACCGCTGTGTAG
SCD5	92	138	91	N	1	1	24	13.5	1.95622	1	0.349965	24	17	6.62569	ATGGGGGATACGCCAGCAACAGACGCCGGCCGCCAAGATCTGCATCCCTAGGCCACGCTAAGACCCTGGGGAAGAGCGCAGGAGCCCGGGAGAAGGGCTGGAAGGAGGGGACTGGACGTGCGGAGAATTCCCCCCTAA
AGGF1	241	99	43	N	1	1	24	14.5	1.88245	1	0.398806	24	19	7.58208	ATGGCCAGGGGCCACCGCGGCCAGCCGGGTGTGAGGCTGCCTTTCGCTGCCCGCGCGCTCCAGTGGTCTCTGGGTCCGCCGGCGTCCGTTTCGGCCTGA
ZNF45	71	978	43	Y	1	1	24	10.5	1.82384	1	1	24	9.5	0.540922	ATGGTTTGGTCGTAGGATCAGCAGGGCTCGCACTTCGGTCAGCAGGAAAAGACGCTGCGGCGAGCAGCGGAGGGCGGAGTTGAATGGCTGGGCAGCTGATTGCCTTACTGTATCCGGAGCTGCTGCGTTCGGGGCGGTTCGGGAGTCCCCTGGTTGGAAGTGGACCTGAATGGGGAGGCGTCTGAGGATCTCCTGGGCTCTCAGCGGCCCGACCCGCCTTCCCCCACCTCCCACAGCTCTGTAGCTTCCTAGCGGTGTAACGTTGGGAAAGGAGGCTGTTCTTGGACTATGCCTGACCCGTTTTTTAAGAAAGAGTGCATCACTCAACAGGTGGCGTCTGGAGTTATCCTCTGTGGATTTTCCAGGATCTCAGACAAGATCGTGCAATCTCCCAGCCTC…
CANT1	179	267	50	Y	1	1	24	8.5	1.75791	0.861918	0.110879	24	15	10.705	ATGGAACTTCCTTCCTCACTCAGCTTCCCACGTTGCCAGCTGGGACAGGGGAGATGGAGTAATTTTGCTGTGGAAAGACTTCACGTCTTGCCGAATGAAAGTAAGCAAAGATACTGCTAGAGTCGGGAATCTAGAGTCGGGAATTCATTAAGCCAAGGGAGTAAGAATGGCCACAGAGTAGTGAAATACTGTTTCTTCTGGAAAAGTCAGCCTCCAGCGCCTGCAGCTTCCGGAACTAAGATGTGACTGGGCTTGCGGAGGCGCTGA
NUAK1	118	1152	111	Y	1	1	24	16.5	1.72616	1	0.174483	24	14	3.86051	ATGGCGGCCTTCGCTGGCAGGGTGGGCGCCTCTGGGGAGCCAGCTCCGTCCCGGCGCCTTTAGAGCCCCATCTCTTCCACGTCCCTGGCCTTCCTCCCCTTCCAGGCGGCTGTCCCCGCCGGGGTCCAGATGGTGTCGGAGGGCCGGCGGTTCGACGGCGGGCCCGGGGTTCAGCCTCCCGGCCTCCCTCCGTCCCTGACTCTCCTTTCTTCGGAGAGGGCGCGGGGGCCGGGGCCAAAGCGCCGCTCTTGGGGTTCTCCTGGACTCGGAGTTGCCCCAGGCGGGCGCAGCTCTGCCCCGCGGGGTGCCAGCCTCGGGCGGGCAAGGTCCGTGAGTCACCGCCTGTAACCGAACACCAGGCCTCCCTGCCCCCTCCCCCAGCTCCGGCCGCCAGGCTGC…
MAPKAPK3	316	285	42	Y	1	1	24	8.5	1.53632	1	0.201719	24	17	6.90065	ATGCGGACAGAAGACAGCCCCAGGGAACAAATGCTAGGAAATGGCAGGGTGAGAAAACTGAGGCATGGAGAGGTTACAATATAACTTAGATCTCCCAGCTGGCAAGTAATGGTTTAAGCCAGGAGCCTACACACTTCCTCCTACTTCCTCTATGGGTGCTGGTGATCTGCCGACTCCTAGACATCCAGCTTTAAGGTCCTCAGTGAAGCTTCTCTGCCCCCAGGCCTGTCCATGTCAGAGCACCATGGGTGTCCCTTTGAAAGTATCTCCTACAGGTGCCACTAG
TMEM126A	74	39	66	Y	1	1	24	16.5	1.50353	1	1	24	16.5	1.44655	ATGGCTGCGCCCAGGTAATTTGAGCAAAGGCCACAGTGA
OSER1	64	153	36	Y	1	1	24	7.5	1.31564	1	1	24	11.5	0.464161	ATGCCGGAGTGCGCAGGCGCAACGCGACTCCCGAGGCGCGGGCCGCCCCCTTGGCTGGTTTGGATCCGGGTCAGTCGGGTGCCGAGATTTGGGAGAGACGCTCTGAACTGACTGCCCCGCATCACCGGAGCGTCCCAGCTGCGAGGAGTGTAA
CHCHD7	101	36	35	N	1	1	24	16.5	1.30397	1	1	24	7.5	0	ATGCAAAGGAGGGGACTTTCGGAAATCCAAACTTAG
COMMD5	27	921	316	Y	1	1	24	16.5	1.2976	1	1	24	11.5	1.54342	ATGCCGTTCCTTCGCGCGTGAGGCTGCGGCTCTGACGCCCCATAGGCTCCTTCAATTTCCGTGATCCTCGGAGTCCCCAGGAGACCAGGTGATGGCAGCAGCCAGACTCCTGCCAGTGCCGGCAGGACCCCAGCCCCTGTCGTTCCAGGCCAAGCTGACCTTCGAGGATGTGGCTGTGCTCCTCTCCCAGGATGAATGGGACCGCCTGTGCCCTGCTCAGAGGGGTCTCTACAGAAATGTGATGATGGAAACCTATGGGAATGTAGTCTCATTGGGACTTCCAGGATCCAAGCCTGACATAATCTCCCAGCTGGAGCGAGGGGAAGATCCCTGGGTCCTGGACAGGAAGGGGGCTAAGAAGAGCCAGGGCCTGTGGAGTGACTACTCAGACAACCTCAA…
PRELID1	55	54	116	N	1	1	24	14.5	1.17749	1	1	24	14.5	6.35261	ATGGCGGCGGCGGCGGCGGCGGCAGCTGCTTGGGCGCGGTGCGGTGGTGACTGA
SAR1B	20	204	30	Y	1	1	24	14.5	1.00161	1	1	24	15.5	0.225249	ATGCGAACTGGGGCCACGGCAGCCATCGCGCTTTGCAGTTCGGTCTCCTGGTGTACGGCCAACGCCAAGTAGGGGATTGCGTTCCCTCCAGTCGCAGAGTTTCCCTCTTGTCGCCCAGGCTGGAGTGAAGTGGCACGATCTCGGCTTACTGCAAGCTCCGCCTCCCGGGTTCACGCCATTCTCCTGCCTCAGCCTCCCGAGTAG
NOP16	4	174	46	Y	1	1	24	13.5	0.9878	1	1	24	9.5	0.471923	ATGAAAGGGGCGGGGAAACGAATAAATTGAGCCTTGTACGCAGGCGCAAATGCTCGTTGCATCCTGGGAGTCGTAGTGCTCAGCACGGTAGTGCTACAAAAGGACTACATTTCCCCAAATGCCCGCAAAGCCTTGTGCACGCCTTCCGGAAGGAGTTTGTTACACGAGGTCTGA
AGPAT5	26	231	56	Y	1	1	24	15.5	0.852808	1	0.232515	24	13.5	4.49023	ATGTGGCGATGGGTGAGGGTCATGGGGTGTGAGCATCCCTGAGCCATCGATCCGGGAGGGCCGCGGGTTCCCTTGCTTTGCCGCCGGGAGCGGCGCACGCAGCCCCGCACTCGCCTACCCGGCCCCGGGCGGCGGCGCGGCCCATGCGGCTGGGGGCGGAGGCTGGGAGCGGGTGGCGGGCGCGGCGGCCCGGGCCCGGGCGGTGATTGGCCGCCTGCTGGCCGCGACTGA
MAGI1	289	66	172	Y	1	1	24	17.5	0.783441	1	1	24	17.5	0.385907	ATGCAAACAAAGCTCGCGGGCGCCTGTGCGGGGCTCGCGGGGAAGCCCAGAAAGTTTGTTTTATGA
JAKMIP2	163	339	40	Y	1	1	24	16.5	0.769559	1	0.735861	24	18	5.04463	ATGCTGCTGCTGCTGCTGCTGCCGCCGCCGCCGCCTCTATTGCTGATACTCTAGTGGGGCTGGAAGGGTGGTTCCTATTCGCACCATCGCCAACCAGAGACAGAGGGAAAAAAAAAACCGGCAGCCACTGCTGATGTTGGGTTCGGAGGCTGCATCCGACTCGGTCACAAGGAAAATGGATTCAGTTTGCATCTCTCCCTCCTTTAAACAGCTTCTCCGGGTCTCAGCATGGGCTTCCAGGGCAGCGATTGAGGAGACCTTACCAAGGAGCACCACACAGTAGATGCTGAGACATCGTACTCCAGGATAAGAAACAGTAACATGGCAGCACCTGCTTGA
ZNF395	77	915	80	Y	1	1	24	14.5	0.712314	1	1	24	7.5	3.28737	ATGAAACTGTGGCAACGTCAGCGCTTGAGGCTTGAAGAGGGAGACAAGCTAAAAGAGGTGTTGTTTTTCTTATGGAAGGATATCCAGTTGTTTCATGATGGCATTTGCACCTCCAAAAAACACAGATGGTCCCAAAATGCAGACAAAGATGAGCACCTGGACACCCCTAAACCATCAGCTATTGAATGACCGGGTATTTGAAGAAAGAAGAGCCCTGCTTGGCAAATGGTTTGACAAATGGACAGACTCTCAAAGAAGAAGAATCCTCACAGGCCTGTTGGAGCGCTGCTCGCTGTCCCAGCAAAAGTTCTGCTGTCGAAAGCTTCAAGAGAAAATTCCAGCAGAAGCCCTGGACTTTACAACCAAGCTTCCAAGGGTGTTATCTTTATACATCTTTTC…
ANAPC1	97	108	43	N	1	1	24	14.5	0.640098	1	1	24	9.5	1.67115	ATGAGAAGCTGCTGCGGCCCAAGAGTCACTGTGAAGGACCCCGCCGCTGCCCTCGGGCCTCCTCGGCCCCTGCGCCTCCGGGGAGCAGCCGGGGCTCGCCGCGCCTGA
LAMP2	26	69	86	N	1	1	24	15.5	0.634128	1	1	24	10.5	1.03983	ATGACTCGCACTGAAGCGCCGATTCCTGGCTTTTGCAAGGCTGTGGTCGGTGGTCATCAGTGCTCTTGA
MPG	141	132	46	Y	1	1	24	12.5	0.630094	0.592475	0.0488609	24	19	7.43273	ATGCCCGCGCGCAGCGGGGCCCAGGTCATGCAGCCTGGGCCCCCATGCCGTGCAGCTCGCACATATGTGGGGCAGAGCAGCCACCCTGCCCCCAGCAGCAGCCGTCCATCGTCAGACGTGATCATTTCCTGA
LSM1	241	33	137	N	1	1	24	7.5	0.271902	1	1	24	10.5	0	ATGGAGGAGCTTCCGGCAGCCCCCGGCGGCTGA
KIAA0319L	168	57	34	N	1	1	24	16.5	0.254709	0.499126	0.0343842	24	16	4.35325	ATGGACCAGGAGGAGGCGGAGGCCGCCGAGAGCCGGGGCCCCGCTATGTGGCCCTGA
EIF4G1	90	246	54	Y	1	1	24	11.5	0	1	0.349965	24	17	9.99553	ATGCCCAGAACCTGTAGGCCGCACCGTGGACTTGTTCTTAATCGAGGGGGTGAGTGAGGGGTCTGTTTCAGTAGGTCAGGGGTTGGTTGGAAGTGATGCGGGTTTGACAGCATGTTGGTGGGGACAGGCTGTATCTTTTCTGCTTCACCCTCTTGGCATCTCTGGGACTCCGTATGGGACCCAGCCCTTGCATCAACCCTTTCACCGCCCCATTTGCCTTAAGCTTGGGTCCCTTCCTCTTCCTGA
EXTL3	48	603	106	Y	1	1	24	15.5	0	1	1	24	10.5	7.00812	ATGGCTGCCGGCCGGCAGGGGGAGCGGCGGATCAGGCGCGGCCTGGAAGGCGGGCGGCCGGCAGCCAGAACGGCTTCTGGGACGCCGACTTTCGCGCAGGCGGCGGCGGCGGCGGCGGCGGGTCCCTGAGCTGGAAGCCGGAGAGCAAGCCCTGGAGGTTCACTCTTTCAAGAAGTCGTGTGCTGAGGTGTAATGCTACACAAGTCAGAGGAAGGAAGGGTCCTGAAACACATGGCCTGATTGTTGGCAAAGGCATCATAAGAAGCTGGCATTTATTTCTGTTCTAACCTATTACTGTATAACTGTGAATAGACACTATGCATATTTGTTGGTCAGCAAAACCAAGAAACAAGAGCTATGGCATTTGAAAAAGTCTGTCTGATTCCAGGGTGTTTTTCC…
HENMT1	209	177	36	Y	1	1	24	8.5	0	1	1	24	12.5	0.586232	ATGGCTTCTGGGCATGCGCCACAGCGGCCGTTACGAGACGCAAAACCGACGCCTTGGAACTGAGAGCCTAGAGGGACGGAGCTCGGCGCACCATGAGGCTCCCGGGGCCCAAGGCCGACCGTGAGAGCGCACGAGCTGAGTCAGTGCTGATTCTCTCAAATAGAGCTTGAAGGATAA
PKP4	45	174	42	Y	1	1	24	14.5	0	1	0.267231	24	15.5	5.6929	ATGGGCAAGGGGTAGAGGGGCAAGTTGGCCACCGCCGCCGCCGGGGGTGGTGGGAGAGCCGCTCCGGGGGCGGGGGCCGGTGGGGGAGGGAGGGGCGGGCAGCCGCGCCGCCGCGGCACTTTTTTAATTTTTTCGGGTGCCGCAGCGGCGACCCCTCGGCGCCGATGTCCCTGA
TRAK2	89	192	166	Y	1	1	24	10.5	0	1	0.306247	24	14.5	4.83292	ATGATGTTGTGAAGTCGCCCGCCTGTCCCTGCCACGCCCGGGCGGTTGCTGGCAGTGGGAGCAGCGGCAGCAGCTTCGGCTGCTGCTTTCAGGCTGCCGCTGCATTAGGGGCTTCCTGAGGAAGCGCGGGCGGACGACAGAGGATGCCGAACCACTCCAGTCATGACTGTCCAAAGTATGATAATCACATGA
