# Supplementary material for: Ribosome profiling reveals an important role for translational control in circadian gene expression
Source: HighWire-hosted journal article supplement (doi:10.1101/gr.191296.115), 2015-09-03
Supplement: Supplemental_Table_S9.xlsx [file Supplemental_Table_S9.xlsx]

## Sheet: Table S9
Supplementary Table S9: Primers used for ribosome profiling library generation, ARNTL siRNA targeting, and quantitative PCR.
Primer Name	Sequence
NI-NI-19	rArUrGrUrArCrArCrGrGrArGrUrCrGrArGrCrUrCrArArCrCrCrGrCrArArCrGrCrGrA[Phos]
NI-NI-21	rArUrGrUrArCrArCrGrGrArGrUrCrGrArCrCrCrArArCrGrCrGrA[Phos]
NI-NI-9	[Phos]AGATCGGAAGAGCGTCGTGTAGGGAAAGAGTGTAGATCTCGGTGGTCGC[Sp-C18]CACTCA[Sp-C18]TTCAGACGTGTGCTCTTCCGATCTATTGATGGTGCCTACAG
NI-NI-21	[BIOTEG]TCCCGGGGCTACGCCTGTCTGAG
NI-NI-23	[BIOTEG]GGGCCCAAGTCCTTCTGATCG
NI-NI-24	[BIOTEG]GCCGAGGGCGCACCACCGGCCCGTCTCG
NI-NI-2	AATGATACGGCGACCACCGAGATCTACAC
CJ-NI-4	CAAGCAGAAGACGGCATACGAGATTGGTCAGTGACTGGAGTTCAGACGTGTGCTCTTCCG
CJ-NI-6	CAAGCAGAAGACGGCATACGAGATATTGGCGTGACTGGAGTTCAGACGTGTGCTCTTCCG
CJ-NI-12	CAAGCAGAAGACGGCATACGAGATTACAAGGTGACTGGAGTTCAGACGTGTGCTCTTCCG
CJ-NI-23	CAAGCAGAAGACGGCATACGAGATCCACTCGTGACTGGAGTTCAGACGTGTGCTCTTCCG
siBMAL1-1	rCrArGrGrTrTrArTrCrCrArTrArTrTrCrTrGrArTrA
siBMAL1-2	rCrArGrArArGrCrArArArCrTrArCrArArArCrCrArA
siBMAL1-3	rCrArGrGrGrTrGrArArArTrCrTrArTrGrGrArArTrA
siBMAL1-4	rCrArArCrTrArArTrTrGrCrTrArTrArArArTrTrTrA
siBMAL1-5	rCrCrArGrGrArArArTrTrArGrArTrArArArCrTrTrA
Bmal1 qPCR F	CGGTCACATCCTACGACAAAC
Bmal1 qPCR R	ACAGAAGCAAACTACAAACCAAC
[Phos] represents an added phosphate group, [Sp-C18] represents a hexa-ethyleneglycol spacer, and [BIOTEG] indicates a 5' TEG-linked biotin molecule
